# Supplementary material for: Assessing Genomic Diversity and Signatures of Selection in Chinese Red Steppe Cattle Using High-Density SNP Array
Source: Animals (Basel). 2023 May 22;13(10):1717. doi: 10.3390/ani13101717 (PMC10215729; doi:10.3390/ani13101717)
Supplement: Supplementary file 1 [file animals-13-01717-s001.zip › Table S1-S9.xlsx]

## Sheet: Table S1
Table S1. Populations and number of samples used in the study.
Breed	Code	Number	Type
Chinese Red Steppe	CRS	61	100K
Angus	ANG	22	whole-genome sequencing (WGS)
Hereford	HER	20	whole-genome sequencing (WGS)
Holstein	HOL	20	whole-genome sequencing (WGS)
Charolais	CHA	23	whole-genome sequencing (WGS)
Limousin	LIM	20	whole-genome sequencing (WGS)
Simmental	SIM	27	whole-genome sequencing (WGS)
Shorthorn	SHO	20	whole-genome sequencing (WGS)
Mongolian	MON	27	whole-genome sequencing (WGS)
Tibetan	TIB	11	whole-genome sequencing (WGS)
Kazakh	KAZ	11	whole-genome sequencing (WGS)
Yanbian	YAN	11	whole-genome sequencing (WGS)
Luxi	LUX	7	whole-genome sequencing (WGS)
Lingnan	LIN	8	whole-genome sequencing (WGS)
Wenling	WEN	11	whole-genome sequencing (WGS)
Zhoushan	ZHO	7	whole-genome sequencing (WGS)

## Sheet: Table S2
Table S2. whole-genome sequencing (WGS) data used in this study.
No	Breed	Sample ID	Project
1	Angus	SRR1346376	PRJNA176557
2	Angus	SRR1348580	PRJNA176557
3	Angus	SRR1355237	PRJNA176557
4	Angus	SRR1355244	PRJNA176557
5	Angus	SRR1355255	PRJNA176557
6	Angus	SRR1365132	PRJNA176557
7	Angus	SRR1365144	PRJNA176557
8	Angus	SRR1425122	PRJNA176557
9	Angus	SRR1425124	PRJNA176557
10	Angus	SRR8587811	PRJNA343262
11	Angus	SRR8587857	PRJNA343262
12	Angus	SRR8587919	PRJNA343262
13	Angus	SRR8587920	PRJNA343262
14	Angus	SRR8587922	PRJNA343262
15	Angus	SRR8587923	PRJNA343262
16	Angus	SRR8587924	PRJNA343262
17	Angus	SRR8587992	PRJNA343262
18	Angus	SRR8588014	PRJNA343262
19	Angus	SRR8588042	PRJNA343262
20	Angus	SRR8588100	PRJNA343262
21	Angus	SRR8588211	PRJNA343262
22	Angus	SRR8588263	PRJNA343262
23	Charolais	SRR1343167	PRJNA176557
24	Charolais	SRR1343168	PRJNA176557
25	Charolais	SRR1343171	PRJNA176557
26	Charolais	SRR1343173	PRJNA176557
27	Charolais	SRR1355253	PRJNA176557
28	Charolais	SRR1355258	PRJNA176557
29	Charolais	SRR1365122	PRJNA176557
30	Charolais	SRR1365145	PRJNA176557
31	Charolais	SRR1348584	PRJNA176557
32	Charolais	SRR1343169	PRJNA176557
33	Charolais	SRR1355254	PRJNA176557
34	Charolais	SRR7363729	PRJNA474946
35	Charolais	SRR7363774	PRJNA474946
36	Charolais	SRR7363748	PRJNA474946
37	Charolais	SRR7363657	PRJNA474946
38	Charolais	SRR7363763	PRJNA474946
39	Charolais	SRR7363654	PRJNA474946
40	Charolais	SRR7363652	PRJNA474946
41	Charolais	SRR7363761	PRJNA474946
42	Charolais	SRR7363768	PRJNA474946
43	Charolais	SRR7363782	PRJNA474946
44	Charolais	SRR7363771	PRJNA474946
45	Charolais	SRR7363769	PRJNA474946
46	Hereford	SAMN05788507	PRJNA343262
47	Hereford	SAMN05788531	PRJNA343262
48	Hereford	SAMN05788534	PRJNA343262
49	Hereford	SAMN05788535	PRJNA343262
50	Hereford	SAMN05788536	PRJNA343262
51	Hereford	SAMN05788537	PRJNA343262
52	Hereford	SAMN05788538	PRJNA343262
53	Hereford	SAMN05788539	PRJNA343262
54	Hereford	SAMN05788540	PRJNA343262
55	Hereford	SAMN05788555	PRJNA343262
56	Hereford	SRR1348589	PRJNA176557
57	Hereford	SRR1348590	PRJNA176557
58	Hereford	SRR1365109	PRJNA176557
59	Hereford	SRR1365111	PRJNA176557
60	Hereford	SRR1365124	PRJNA176557
61	Hereford	SRR1365126	PRJNA176557
62	Hereford	SRR1365131	PRJNA176557
63	Hereford	SRR1365137	PRJNA176557
64	Hereford	SRR1365139	PRJNA176557
65	Hereford	SRR1365140	PRJNA176557
66	Holstein	SRR1425155	PRJNA176557
67	Holstein	SRR1425159	PRJNA176557
68	Holstein	SRR1425161	PRJNA176557
69	Holstein	SRR1425163	PRJNA176557
70	Holstein	SRR1425164	PRJNA176557
71	Holstein	SRR1425166	PRJNA176557
72	Holstein	SRR934405	PRJNA210521
73	Holstein	SRR934406	PRJNA210521
74	Holstein	SRR934407	PRJNA210521
75	Holstein	SRR934408	PRJNA210521
76	Holstein	SRR934409	PRJNA210521
77	Holstein	SRR934410	PRJNA210521
78	Holstein	SRR934411	PRJNA210521
79	Holstein	SRR934412	PRJNA210521
80	Holstein	SRR934413	PRJNA210521
81	Holstein	SRR934414	PRJNA210521
82	Holstein	SRR1365115	SRS631200
83	Holstein	SRR1425157	SRS641745
84	Holstein	SRR1425158	SRS641746
85	Holstein	SRR1425162	SRS641750
86	Kazakh	SRR5507252	PRJNA379859
87	Kazakh	SRR5507253	PRJNA379859
88	Kazakh	SRR5507254	PRJNA379859
89	Kazakh	SRR5507255	PRJNA379859
90	Kazakh	SRR5507256	PRJNA379859
91	Kazakh	SRR5507257	PRJNA379859
92	Kazakh	SRR5507258	PRJNA379859
93	Kazakh	SRR5507259	PRJNA379859
94	Kazakh	SRR5507260	PRJNA379859
95	Kazakh	SRR6234772	PRJNA396672
96	Kazakh	SRR6234773	PRJNA396672
97	Limousin	SAMN05216021	PRJNA324822
98	Limousin	SAMN05216022	PRJNA324822
99	Limousin	SAMN05216023	PRJNA324822
100	Limousin	SAMN05216024	PRJNA324822
101	Limousin	SAMN05216025	PRJNA324822
102	Limousin	SAMN05216026	PRJNA324822
103	Limousin	SAMN10940544	PRJNA343262
104	Limousin	SAMN10940545	PRJNA343262
105	Limousin	SRR1365134	PRJNA176557
106	Limousin	SRR1365136	PRJNA176557
107	Limousin	SRR7363689	PRJNA474946
108	Limousin	SRR7363705	PRJNA474946
109	Limousin	SRR7363712	PRJNA474946
110	Limousin	SRR7363713	PRJNA474946
111	Limousin	SRR7363717	PRJNA474946
112	Limousin	SRR7363718	PRJNA474946
113	Limousin	SRR7363720	PRJNA474946
114	Limousin	SRR7363770	PRJNA474946
115	Limousin	SRR7363783	PRJNA474946
116	Limousin	SRR7363784	PRJNA474946
117	Lingnan	SRR5507221	PRJNA379859
118	Lingnan	SRR5507217	PRJNA379859
119	Lingnan	SRR5507220	PRJNA379859
120	Lingnan	SRR5507218	PRJNA379859
121	Lingnan	SRR5507219	PRJNA379859
122	Lingnan	SRR5507215	PRJNA379859
123	Lingnan	SRR5507216	PRJNA379859
124	Lingnan	SRR5507222	PRJNA379859
125	Luxi	SRR5507238	PRJNA379859
126	Luxi	SRR5507239	PRJNA379859
127	Luxi	SRR5507240	PRJNA379859
128	Luxi	SRR5507241	PRJNA379859
129	Luxi	SRR5507242	PRJNA379859
130	Luxi	SRR6234786	PRJNA396672
131	Luxi	SRR6234787	PRJNA396672
132	Mongolian	SRR10809648	PRJNA598339
133	Mongolian	SRR10809649	PRJNA598339
134	Mongolian	SRR10809650	PRJNA598339
135	Mongolian	SRR10809651	PRJNA598339
136	Mongolian	SRR10809652	PRJNA598339
137	Mongolian	SRR10809654	PRJNA598339
138	Mongolian	SRR10809656	PRJNA598339
139	Mongolian	SRR10809657	PRJNA598339
140	Mongolian	SRR10809658	PRJNA598339
141	Mongolian	SRR10809659	PRJNA598339
142	Mongolian	SRR10809660	PRJNA598339
143	Mongolian	SRR10809661	PRJNA598339
144	Mongolian	SRR10809662	PRJNA598339
145	Mongolian	SRR10809663	PRJNA598339
146	Mongolian	SRR14879644	SRX11196814
147	Mongolian	SRR14879645	SRX11196813
148	Mongolian	SRR14879646	SRX11196812
149	Mongolian	SRR14879667	SRX11196791
150	Mongolian	SRR14879668	SRX11196790
151	Mongolian	SRR14879669	SRX11196789
152	Mongolian	SRR5507261	PRJNA379859
153	Mongolian	SRR5507262	PRJNA379859
154	Mongolian	SRR5507263	PRJNA379859
155	Mongolian	SRR5507264	PRJNA379859
156	Mongolian	SRR5507265	PRJNA379859
157	Mongolian	SRR5507266	PRJNA379859
158	Mongolian	SRR5507267	PRJNA379859
159	Shorthorn	SRR10752668	PRJNA343262
160	Shorthorn	SRR10752669	PRJNA343262
161	Shorthorn	SRR10752670	PRJNA343262
162	Shorthorn	SRR10752671	PRJNA343262
163	Shorthorn	SRR10752672	PRJNA343262
164	Shorthorn	SRR10752673	PRJNA343262
165	Shorthorn	SRR10752674	PRJNA343262
166	Shorthorn	SRR10752675	PRJNA343262
167	Shorthorn	SRR10752676	PRJNA343262
168	Shorthorn	SRR10752678	PRJNA343262
169	Shorthorn	SRR10752679	PRJNA343262
170	Shorthorn	SRR10752680	PRJNA343262
171	Shorthorn	SRR10752681	PRJNA343262
172	Shorthorn	SRR10752682	PRJNA343262
173	Shorthorn	SRR10752683	PRJNA343262
174	Shorthorn	SRR10752684	PRJNA343262
175	Shorthorn	SRR10752685	PRJNA343262
176	Shorthorn	SRR10752696	PRJNA343262
177	Shorthorn	SRR10752697	PRJNA343262
178	Shorthorn	SRR10752699	PRJNA343262
179	Simmental	SAMN05788541	PRJNA343262
180	Simmental	SAMN05788542	PRJNA343262
181	Simmental	SAMN05788543	PRJNA343262
182	Simmental	SAMN05788544	PRJNA343262
183	Simmental	SAMN05788545	PRJNA343262
184	Simmental	SAMN05788546	PRJNA343262
185	Simmental	SAMN10940558	PRJNA343262
186	Simmental	SAMN10940559	PRJNA343262
187	Simmental	SAMN10940560	PRJNA343262
188	Simmental	SAMN10940561	PRJNA343262
189	Simmental	SAMN10940562	PRJNA343262
190	Simmental	SRR1525617	PRJNA256210
191	Simmental	SRR1525618	PRJNA256210
192	Simmental	SRR1525619	PRJNA256210
193	Simmental	SRR1525620	PRJNA256210
194	Simmental	SRR1525621	PRJNA256210
195	Simmental	SRR1525700	PRJNA256210
196	Simmental	SRR1525701	PRJNA256210
197	Simmental	SRR1525702	PRJNA256210
198	Simmental	SRR1525703	PRJNA256210
199	Simmental	SRR1525704	PRJNA256210
200	Simmental	SRR1525706	PRJNA256210
201	Simmental	SRR1525707	PRJNA256210
202	Simmental	SRR1525708	PRJNA256210
203	Simmental	SRR1525709	PRJNA256210
204	Simmental	SRR1525710	PRJNA256210
205	Simmental	SRR1525711	PRJNA256210
206	Tibetan	SRR5507250	PRJNA379859
207	Tibetan	SRR5507246	PRJNA379859
208	Tibetan	SRR5507245	PRJNA379859
209	Tibetan	SRR5507251	PRJNA379859
210	Tibetan	SRR5507249	PRJNA379859
211	Tibetan	SRR5507244	PRJNA379859
212	Tibetan	SRR5507243	PRJNA379859
213	Tibetan	SRR5507247	PRJNA379859
214	Tibetan	SRR5507248	PRJNA379859
215	Tibetan	SRR6024572	PRJNA379859
216	Tibetan	SRR6024571	PRJNA379859
217	Wenling	DRR295117	PRJDB10918
218	Wenling	DRR295118	PRJDB10918
219	Wenling	DRR295119	PRJDB10918
220	Wenling	DRR295120	PRJDB10918
221	Wenling	DRR295121	PRJDB10918
222	Wenling	DRR295122	PRJDB10918
223	Wenling	DRR295123	PRJDB10918
224	Wenling	DRR295124	PRJDB10918
225	Wenling	DRR295125	PRJDB10918
226	Wenling	SRR6234762	PRJNA396672
227	Wenling	SRR6234763	PRJNA396672
228	Yanbian	SRR6234774	PRJNA396672
229	Yanbian	SRR6234775	PRJNA396672
230	Yanbian	SRR5507273	PRJNA379859
231	Yanbian	SRR14879666	SRX11196792
232	Yanbian	SRR14879665	SRX11196793
233	Yanbian	SRR14879664	SRX11196794
234	Yanbian	SRR14879663	SRX11196795
235	Yanbian	SRR14879662	SRX11196796
236	Yanbian	SRR14879661	SRX11196797
237	Yanbian	SRR14879660	SRX11196798
238	Yanbian	SRR14879658	SRX11196800
239	Zhoushan	DRR295128	PRJDB10918
240	Zhoushan	DRR295126	PRJDB10918
241	Zhoushan	DRR295127	PRJDB10918
242	Zhoushan	DRR295131	PRJDB10918
243	Zhoushan	DRR295129	PRJDB10918
244	Zhoushan	DRR295132	PRJDB10918
245	Zhoushan	DRR295130	PRJDB10918

## Sheet: Table S3
Table S3. Number of SNPs in each autosome for merge data in 306 individuals from 16 breeds
chr	Bos taurus ARS-UCD1.2 chr length (Mb)	SNP Num	average interval (kb)
1	158.53	4994	31.75
2	136.23	4276	31.86
3	121.01	4075	29.7
4	120	3650	32.88
5	120.09	3972	30.23
6	117.81	3851	30.59
7	110.68	3496	31.66
8	113.32	3442	32.92
9	105.45	3352	31.46
10	103.31	3311	31.2
11	106.98	3457	30.95
12	87.22	2725	32.01
13	83.47	2762	30.22
14	82.4	2709	30.42
15	85.01	2736	31.07
16	81.01	2513	32.24
17	73.17	2424	30.19
18	65.82	2290	28.74
19	63.45	2329	27.24
20	71.97	2463	29.22
21	69.86	2315	30.18
22	60.77	1975	30.77
23	52.5	1849	28.39
24	62.32	2036	30.61
25	42.35	1523	27.81
26	51.99	1598	32.53
27	45.61	1538	29.66
28	45.94	1551	29.62
29	51.1	1659	30.8

## Sheet: Table S4
Table S4. Genetic diversity of the 16 cattle breeds used in this study.
Breed	Code	Sample Size	pi	HO	HE	FHOM	FROH
Chinese Red Steppe	CRS	61	4.3e-05	0.387	0.375	-0.0312	0.088
Angus	ANG	22	4.5e-05	0.377	0.377	-0.0003	0.111
Hereford	HER	20	4.3e-05	0.355	0.361	0.0163	0.133
Holstein	HOL	20	4.5e-05	0.372	0.379	0.0186	0.096
Charolais	CHA	23	4.6e-05	0.394	0.394	0.0012	0.038
Limousin	LIM	20	4.6e-05	0.386	0.387	0.00351	0.028
Simmental	SIM	27	4.5e-05	0.386	0.385	-0.0017	0.053
Shorthorn	SHO	20	4.2e-05	0.373	0.355	-0.0504	0.093
Mongolian	MON	27	4.6e-05	0.379	0.399	0.0495	0.02
Tibetan	TIB	11	4.2e-05	0.329	0.323	-0.0215	0.06
Kazakh	KAZ	11	4.7e-05	0.387	0.395	0.0183	0.033
Yanbian	YAN	11	4.7e-05	0.401	0.384	-0.0435	0.007
Luxi	LUX	7	4.4e-05	0.371	0.309	-0.198	0.006
Lingnan	LIN	8	4.1e-05	0.282	0.308	0.0864	0.073
Wenling	WEN	11	3.4e-05	0.189	0.195	0.0318	0.061
Zhoushan	ZHO	7	3.9e-05	0.208	0.201	-0.0326	0.079

## Sheet: Table S5
Table S5. A summary of genes from iHS in CRS.
Chromosome	Starting position	Ending position	iHS	Gene
4	62594973	62694973	6.62	BMPER
7	89931895	90031895	5.8	CETN3，MBLAC2
6	99239456	99339456	5.52	NKX6-1
22	14418669	14518669	5.52	TRAK1
29	12962326	13062326	5.45	NOT_FOUND
5	82817739	82917739	5.4	TM7SF3，FGFR1OP2，INTS13
25	14240145	14340145	5.21	ABCC1，MYH11，CEP20
25	20040203	20140203	5.05	IGSF6，METTL9
1	45715244	45815244	4.9	IMPG2
10	76594020	76694020	4.84	AKAP5，HSPA2，PPP1R36，MTHFD1，ZBTB1，ZBTB25
26	18134951	18234951	4.82	LCOR
4	60694954	60794954	4.76	ANLN，AOAH
3	96372418	96472418	4.73	NOT_FOUND
6	113339597	113439597	4.67	KIAA0232，TBC1D14
10	53393788	53493788	4.53	NOT_FOUND
20	16953833	17053833	4.53	U6，DIMT1，KIF2A，IPO11
5	6116972	6216972	4.49	ZDHHC17
5	55717468	55817468	4.47	TSPAN31，AGAP2，OS9
17	55204781	55304781	4.45	ATXN2
8	106411571	106511571	4.39	ASTN2
1	73015517	73115517	4.37	ATP13A3
11	45591570	45691570	4.34	ST6GAL2
24	1337045	1437045	4.29	NOT_FOUND
7	105032046	105132046	4.27	NOT_FOUND
9	45916807	46016807	4.23	NOT_FOUND
16	48940142	49040142	4.23	NOT_FOUND
10	99294247	99394247	4.19	NOT_FOUND
18	28661288	28761288	4.16	NOT_FOUND
13	61899435	61999435	4.15	NOL4L
2	90170217	90270217	4.1	U6，ALS2，TMEM237，MPP4
6	96239426	96339426	4.1	RASGEF1B
13	31799134	31899134	4.09	ST8SIA6
14	23265970	23365970	4.09	U1，MOS，RPS20，PLAG1
19	52073182	52173182	4.06	ENDOV
7	90831904	90931904	4.04	ARRDC3
11	101992134	102092134	4.04	MED27
14	19265930	19365930	4.04	SPIDR
27	33515411	33615411	4.03	NSD3，LETM2，FGFR1
11	61191726	61291726	4.01	EHBP1
9	62716975	62816975	4	ZNF292，CGA
12	35792137	35892137	3.96	EEF1AKMT1，IL17D，IFT88
10	78394038	78494038	3.91	NOT_FOUND
19	42873090	42973090	3.9	U6，AOC3，G6PC1，SAO
3	27271727	27371727	3.89	SLC22A15
9	62516973	62616973	3.88	SMIM8，C9H6orf163
13	68399500	68499500	3.84	NOT_FOUND
9	42716775	42816775	3.82	PDSS2
3	109072545	109172545	3.77	GRIK3
14	27666014	27766014	3.77	NKAIN3
6	93439398	93539398	3.75	BMP2K
25	40440407	40540407	3.75	CARD11
6	69239156	69339156	3.73	NOT_FOUND
10	70893963	70993963	3.73	DACT1
24	33537367	33637367	3.73	RBBP8
24	20137233	20237233	3.71	NOT_FOUND
1	2014807	2114807	3.69	DNAJC28，IFNGR2，TMEM50B
7	99831994	99931994	3.69	NOT_FOUND
12	78292562	78392562	3.68	NOT_FOUND
18	63561637	63661637	3.68	NOT_FOUND
4	41894766	41994766	3.67	NOT_FOUND
10	71593970	71693970	3.66	U6，DAAM1
6	95839422	95939422	3.65	BMP3，PRKG2
11	98892103	98992103	3.63	TRUB2，COQ4，SLC27A4，URM1
12	35292132	35392132	3.6	FGF9
2	56669882	56769882	3.59	LRP1B
11	45791572	45891572	3.59	ECRG4
14	21765955	21865955	3.59	ATP6V1H
18	44761449	44861449	3.59	GARRE1，PDCD2L，UBA2，GPI
6	95739421	95839421	3.57	BMP3
6	100439468	100539468	3.57	NOT_FOUND
10	46193716	46293716	3.57	HERC1
19	53573197	53673197	3.55	U6，CYTH1
5	77017681	77117681	3.53	PKP2
7	40731403	40831403	3.53	OR2C3B，OR2C3，OR2B11，OR2W53
13	64999466	65099466	3.53	SCAND1，PHF20
21	44923336	45023336	3.51	U1，U3，EAPP，SNX6
29	35962556	36062556	3.5	TMEM45B
9	19716545	19816545	3.49	BCKDHB，TTK
11	58491699	58591699	3.49	LRRTM4
11	57391688	57491688	3.47	NOT_FOUND
22	2718552	2818552	3.46	CMC1，AZI2
5	113018041	113118041	3.44	SMDT1，MGC127055，PHETA2，CYP2D14，NAGA，NDUFA6，TCF20
13	62599442	62699442	3.44	BPIFA2B
7	27431270	27531270	3.43	GRAMD2B
10	44893703	44993703	3.43	NID2
14	25065988	25165988	3.43	TOX
6	93139395	93239395	3.42	FRAS1
3	9671551	9771551	3.41	SLAMF9，TAGLN2，IGSF9
3	9171546	9271546	3.39	SLAMF6，VANGL2
5	76417675	76517675	3.39	SYT10
12	22492004	22592004	3.39	NOT_FOUND
14	25765995	25865995	3.39	NOT_FOUND
17	56004789	56104789	3.39	CCDC60
20	29453958	29553958	3.39	HCN1
8	76011267	76111267	3.38	U6，CCL27，CCL21，CCL19，GALT，IL11RA
9	63516983	63616983	3.38	NOT_FOUND
3	32871783	32971783	3.36	KCNA10，PROK1，CYM
6	78439248	78539248	3.36	NOT_FOUND
13	57199388	57299388	3.36	ZNF831
4	9594443	9694443	3.34	ANKIB1
16	51040163	51140163	3.34	FNDC10，ANKRD65，MRPL20，TMEM88B，CCNL2，VWA1，TMEM240，ATAD3A，SSU72
1	126816055	126916055	3.33	TFDP2
6	98739451	98839451	3.33	NOT_FOUND
11	99092105	99192105	3.33	DYNC2I2，SPTAN1
14	22965967	23065967	3.33	TMEM68
21	49123378	49223378	3.33	PNN，TRAPPC6B，GEMIN2
8	15410661	15510661	3.32	NOT_FOUND
13	64499461	64599461	3.32	FAM83C，EIF6，UQCC1，MMP24
1	12714914	12814914	3.31	NOT_FOUND
7	65231648	65331648	3.3	U6，FAM114A2
12	63892418	63992418	3.3	NOT_FOUND
17	55904788	56004788	3.3	CCDC60
8	42510932	42610932	3.28	U6，SMARCA2
8	75811265	75911265	3.27	ENHO，FAM219A，DNAI1
11	63591750	63691750	3.27	SPRED2，ACTR2
7	38931385	39031385	3.26	PRR7，DOK3，DDX41，GRK6，FAM193B，DBN1
22	14818673	14918673	3.26	KLHL40，HHATL，CCDC13，ACKR2
3	20271657	20371657	3.25	CIART，C3H1orf54，MRPS21，PRPF3，RPRD2
19	52473186	52573186	3.25	EIF4A3，GAA，TBC1D16，CCDC40
3	39771852	39871852	3.24	RNPC3，AMY2B
10	47793732	47893732	3.24	NOT_FOUND
10	71093965	71193965	3.24	NOT_FOUND
16	13739790	13839790	3.24	NOT_FOUND
2	122070536	122170536	3.23	SNORA70，HCRTR1，PEF1，TINAGL1
3	16271617	16371617	3.23	CFAP141，C3H1orf43，NUP210L，TPM3，UBAP2L
5	57417485	57517485	3.23	ORMDL2，MMP19，GDF11，DNAJC14，SARNP
14	25465992	25565992	3.23	NOT_FOUND
14	65466392	65566392	3.23	STK3
6	96739431	96839431	3.22	NOT_FOUND
6	98839452	98939452	3.22	NOT_FOUND
7	99931995	100031995	3.22	NOT_FOUND
8	9510602	9610602	3.21	KIF13B
13	4398860	4498860	3.21	NOT_FOUND
21	6922956	7022956	3.21	MEF2A
1	12914916	13014916	3.2	NOT_FOUND
6	70139165	70239165	3.2	KIT
14	24565983	24665983	3.2	CYP7A1，UBXN2B
21	52923416	53023416	3.2	NOT_FOUND
5	53917450	54017450	3.19	NOT_FOUND
14	65966397	66066397	3.19	NIPAL2
2	50669822	50769822	3.18	NOT_FOUND
5	31917230	32017230	3.18	H1-7，ZNF641
7	41031406	41131406	3.18	OR6F1，OR14P2，OR6AA1
9	43016778	43116778	3.18	NOT_FOUND
14	11165849	11265849	3.18	NOT_FOUND
15	46692258	46792258	3.18	CNGA4，CAVIN3，CCKBR
1	84015627	84115627	3.17	MCCC1，ATP11B，DCUN1D1
2	124370559	124470559	3.17	TMEM200B，SRSF4，EPB41
8	60511112	60611112	3.17	SNORA70，GNE，RNF38
3	70572160	70672160	3.16	FPGT，LRRIQ3
6	95939423	96039423	3.16	PRKG2
9	42216770	42316770	3.16	SEC63，SCML4
28	27497052	27597052	3.16	SLC29A3，CDH23
15	35192143	35292143	3.15	NOT_FOUND
16	49140144	49240144	3.14	C16H1orf174，CEP104，DFFB
5	47617387	47717387	3.13	LLPH，IRAK3，TMBIM4
7	22231218	22331218	3.13	NOT_FOUND
11	98692101	98792101	3.13	BBLN，LCN2，NAIF1，PTGES2，SLC25A25
13	50199318	50299318	3.13	NOT_FOUND
14	22865966	22965966	3.13	XKR4
16	8039733	8139733	3.13	NOT_FOUND
28	25297030	25397030	3.13	U6，KIFBP
1	13514922	13614922	3.12	NOT_FOUND
3	21371668	21471668	3.12	ANKRD34A，POLR3GL，TXNIP，PEX11B，ITGA10，RBM8A
11	97392088	97492088	3.12	LMX1B
17	38704616	38804616	3.12	NOT_FOUND
7	53831534	53931534	3.11	ARHGAP26
8	75511262	75611262	3.11	DCAF12，UBAP1
10	72693981	72793981	3.11	SIX6
12	42292202	42392202	3.11	NOT_FOUND
20	70854372	70954372	3.11	NOT_FOUND
21	38923276	39023276	3.11	NOT_FOUND
3	71672171	71772171	3.1	NOT_FOUND
13	63299449	63399449	3.1	RALY
21	45523342	45623342	3.1	PRORP，PSMA6
10	85894113	85994113	3.09	LTBP2，FCF1，AREL1
19	2472686	2572686	3.09	NOT_FOUND
1	13214919	13314919	3.08	NOT_FOUND
2	95770273	95870273	3.08	CREB1
13	72299539	72399539	3.08	NOT_FOUND
14	24465982	24565982	3.08	NOT_FOUND
1	46115248	46215248	3.07	U6，NFKBIZ，NXPE3
3	26971724	27071724	3.07	NOT_FOUND
7	40631402	40731402	3.07	U6，OR2H10，NLRP3
15	64592437	64692437	3.07	CAPRIN1
1	83615623	83715623	3.06	SNORA63，MCF2L2
3	108872543	108972543	3.06	GRIK3
5	90417815	90517815	3.06	AEBP2
7	90531901	90631901	3.06	ADGRV1
24	47637508	47737508	3.06	ZBTB7C
4	75095098	75195098	3.05	NOT_FOUND
19	48273144	48373144	3.05	SNORD104，SNORA50C，TEX2，ERN1
2	51569831	51669831	3.04	NOT_FOUND
5	6516976	6616976	3.04	U6
10	45393708	45493708	3.04	ZNF609
10	93294187	93394187	3.04	NOT_FOUND
14	50666244	50766244	3.04	NOT_FOUND
1	84215629	84315629	3.03	NOT_FOUND
3	62972084	63072084	3.03	ADGRL2
6	81939283	82039283	3.03	NOT_FOUND
28	25597033	25697033	3.03	HK1，HKDC1
5	57317484	57417484	3	SUOX，CDK2，PMEL，RAB5B，PYM1，DGKA
10	72493979	72593979	3	PPM1A
16	40940062	41040062	3	NOT_FOUND
10	53993794	54093794	2.99	TEX9
22	34018865	34118865	2.99	SUCLG2
28	21196989	21296989	2.99	NOT_FOUND
1	93715724	93815724	2.98	NLGN1
2	77270088	77370088	2.98	NOT_FOUND
8	54111048	54211048	2.98	CEP78
9	3616384	3716384	2.98	NOT_FOUND
1	83815625	83915625	2.97	B3GNT5，MCF2L2
9	46316811	46416811	2.97	NOT_FOUND
13	62399440	62499440	2.97	BPIFB4
16	47440127	47540127	2.97	NPHP4
10	45693711	45793711	2.96	CSNK1G1
13	70799524	70899524	2.96	PTPRT
17	704236	804236	2.96	CPE
26	47735247	47835247	2.96	NOT_FOUND
2	97570291	97670291	2.95	UNC80
8	49911006	50011006	2.95	NOT_FOUND
11	36891483	36991483	2.95	ACYP2
3	66672121	66772121	2.94	U6，NEXN，FUBP1，DNAJB4
7	64231638	64331638	2.94	NOT_FOUND
10	72793982	72893982	2.94	SIX1，SIX4
13	48999306	49099306	2.94	NOT_FOUND
15	35792149	35892149	2.94	SOX6
20	45354117	45454117	2.94	U6
3	2871483	2971483	2.93	NOT_FOUND
8	83411341	83511341	2.93	ZNF782
22	13918664	14018664	2.93	ULK4
2	57169887	57269887	2.92	NOT_FOUND
3	109172546	109272546	2.92	NOT_FOUND
8	96311470	96411470	2.92	NOT_FOUND
8	107911586	108011586	2.92	NOT_FOUND
9	103817386	103917386	2.92	NOT_FOUND
11	18291297	18391297	2.92	NOT_FOUND
18	35861360	35961360	2.92	ZFP90
21	38223269	38323269	2.92	NOT_FOUND
1	148516272	148616272	2.91	MORC3，DOP1B
3	19371648	19471648	2.91	PSMB4，RFX5，SELENBP1
6	104939513	105039513	2.91	DRD5，SLC2A9
7	14731143	14831143	2.91	U6，ICAM4，ICAM5，S1PR2，MRPL4，ICAM1
7	34631342	34731342	2.91	DMXL1
11	94692061	94792061	2.91	DENND1A
29	35062547	35162547	2.91	NOT_FOUND
2	83370149	83470149	2.9	NOT_FOUND
10	70093955	70193955	2.9	NOT_FOUND
1	12814915	12914915	2.89	NOT_FOUND
10	51893773	51993773	2.89	NOT_FOUND
10	65993914	66093914	2.89	NOT_FOUND
10	71393968	71493968	2.89	DAAM1
13	65599472	65699472	2.89	MYL9，TGIF2，DLGAP4
2	124870564	124970564	2.88	SNORA73，TRNAU1AP，RCC1，PHACTR4
10	12693381	12793381	2.88	RAB11A，MEGF11
14	39966137	40066137	2.88	ZFHX4
16	2139674	2239674	2.88	PPP1R15B，PIK3C2B
1	115715944	115815944	2.87	NOT_FOUND
10	87194126	87294126	2.87	TTLL5，IFT43，TGFB3
13	8598902	8698902	2.87	NOT_FOUND
17	38204611	38304611	2.87	NOT_FOUND
24	35737389	35837389	2.87	ADCYAP1
26	38235152	38335152	2.87	RAB11FIP2
1	14914936	15014936	2.86	NOT_FOUND
4	76695114	76795114	2.86	PPIA，H2AZ2，ZMIZ2，OGDH
5	24417155	24517155	2.86	TMCC3
8	77811285	77911285	2.86	NOT_FOUND
8	81511322	81611322	2.86	AOPEP
10	71893973	71993973	2.86	RTN1
12	55092330	55192330	2.86	NOT_FOUND
13	67899495	67999495	2.86	NOT_FOUND
17	13104360	13204360	2.86	U6，ANAPC10，ABCE1，OTUD4
17	55104780	55204780	2.86	ATXN2，SH2B3
4	63194979	63294979	2.85	BBS9
5	6416975	6516975	2.85	U6，E2F7
7	66031656	66131656	2.85	CNOT8，MRPL22，GEMIN5
9	45616804	45716804	2.85	NOT_FOUND
13	51899335	51999335	2.85	ITPA，SLC4A11，DNAAF9
21	27623163	27723163	2.85	KLF13
8	30310810	30410810	2.84	NOT_FOUND
12	45992239	46092239	2.84	NOT_FOUND
13	65299469	65399469	2.84	AAR2，EPB41L1
7	90731903	90831903	2.83	NOT_FOUND
16	49340146	49440146	2.83	TPRG1L，MEGF6，WRAP73，TP73
17	31004539	31104539	2.83	NOT_FOUND
10	7293327	7393327	2.82	SV2C
13	30699123	30799123	2.82	NOT_FOUND
13	71599532	71699532	2.82	NOT_FOUND
18	52461526	52561526	2.82	CEACAM19，CEACAM16，BCL3，CBLC
29	42362620	42462620	2.82	FLRT1，MACROD1
3	9371548	9471548	2.81	PEX19，PEA15，COPA，DCAF8
3	64572100	64672100	2.81	U6
5	41117322	41217322	2.81	SLC2A13
7	106332059	106432059	2.81	NOT_FOUND
8	61911126	62011126	2.81	SHB，SLC25A51，DCAF10
13	67199488	67299488	2.81	BPI，LBP
24	61137643	61237643	2.81	PHLPP1
27	19315269	19415269	2.81	FGL1，PCM1
1	17714964	17814964	2.8	NOT_FOUND
3	108572540	108672540	2.8	NOT_FOUND
10	93794192	93894192	2.8	WDR36
13	74699563	74799563	2.8	NCOA5，MMP9，ZNF335，SLC12A5
16	47240125	47340125	2.8	NPHP4，KCNAB2
24	43037462	43137462	2.8	SPIRE1，PSMG2，CEP76，PTPN2
1	137516162	137616162	2.79	NOT_FOUND
6	50538969	50638969	2.79	NOT_FOUND
7	97731973	97831973	2.79	NOT_FOUND
8	64711154	64811154	2.79	NOT_FOUND
9	61016958	61116958	2.79	PNRC1，RNGTT
13	65699473	65799473	2.79	RAB5IF，SLA2，NDRG3
18	34761349	34861349	2.79	TMEM208，B3GNT9，FHOD1，FBXL8，NOL3，ELMO3，HSF4，EXOC3L1，TRADD，E2F4，KIAA0895L，PHAF1
1	130316090	130416090	2.78	PIK3CB
6	50838972	50938972	2.78	NOT_FOUND
11	58791702	58891702	2.78	NOT_FOUND
12	74992529	75092529	2.78	IPO5
10	94694201	94794201	2.77	NOT_FOUND
13	59599412	59699412	2.77	MC3R，SIRPB2，SIRPD
14	765745	865745	2.77	GRINA，PARP10，OPLAH，PLEC，SPATC1
14	50066238	50166238	2.77	NOT_FOUND
16	60040253	60140253	2.77	RALGPS2
3	80772262	80872262	2.76	CACHD1
4	2694374	2794374	2.76	NOT_FOUND
6	80239266	80339266	2.76	NOT_FOUND
7	99731993	99831993	2.76	FAM174A
9	15516503	15616503	2.76	MYO6，IMPG1
10	45593710	45693710	2.76	PCLAF，CSNK1G1，TRIP4
17	504234	604234	2.76	KLHL2，MSMO1，CPE
8	71611223	71711223	2.75	ADAMDEC1，ADAM7
9	38816736	38916736	2.75	TRAF3IP2
11	18091295	18191295	2.75	NOT_FOUND
16	54240195	54340195	2.75	NOT_FOUND
1	18014967	18114967	2.74	NOT_FOUND
1	31815105	31915105	2.74	NOT_FOUND
9	62916977	63016977	2.74	NOT_FOUND
16	50540158	50640158	2.74	FAAP20，SKI，PRKCZ
8	52311030	52411030	2.73	PCSK5
8	61511122	61611122	2.73	U6，POLR1E，GRHPR，ZBTB5
26	38335153	38435153	2.73	NOT_FOUND
4	26994617	27094617	2.72	HDAC9
11	57091685	57191685	2.72	NOT_FOUND
12	31592095	31692095	2.72	FLT1
18	35161353	35261353	2.71	C18H16orf86，PARD6A，ENKD1，ACD，CARMIL2，CTCF，GFOD2
21	46523352	46623352	2.71	NOT_FOUND
22	17718702	17818702	2.71	OXTR，CAV3
1	14214929	14314929	2.7	NOT_FOUND
8	15510662	15610662	2.7	NOT_FOUND
8	38810895	38910895	2.7	MLANA，ERMP1
9	32716675	32816675	2.7	SLC35F1
10	51293767	51393767	2.7	U7，RNF111，SLTM
10	70493959	70593959	2.7	ARID4A，PSMA3，ACTR10
11	17991294	18091294	2.7	NOT_FOUND
17	1804247	1904247	2.7	TLL1
19	2572687	2672687	2.7	NOT_FOUND
20	70754371	70854371	2.7	MRPL36，NDUFS6，IRX4
6	98539449	98639449	2.69	NOT_FOUND
10	8793342	8893342	2.69	TBCA
21	24823135	24923135	2.69	TM6SF1，HDGFL3
1	47215259	47315259	2.68	NOT_FOUND
3	26571720	26671720	2.68	IGSF3
3	55572010	55672010	2.68	NOT_FOUND
3	118372638	118472638	2.68	HDAC4
4	67195019	67295019	2.68	TRIL
6	9838562	9938562	2.68	NOT_FOUND
13	68099497	68199497	2.68	NOT_FOUND
13	68999506	69099506	2.68	NOT_FOUND
14	665744	765744	2.68	OPLAH，EXOSC4，CYC1，WDR97，HGH1，GPAA1，SHARPIN，MAF1，MROH1
15	56292354	56392354	2.68	ACER3
21	28023167	28123167	2.68	FAM189A1，APBA2
3	14871603	14971603	2.67	SYT11，GON4L
8	55311060	55411060	2.67	NOT_FOUND
11	13191246	13291246	2.67	ZNF638
13	71799534	71899534	2.67	NOT_FOUND
14	23665974	23765974	2.67	NOT_FOUND
21	32423211	32523211	2.67	PEAK1
1	119615983	119715983	2.66	NOT_FOUND
2	79270108	79370108	2.66	NOT_FOUND
5	24317154	24417154	2.66	CEP83，TMCC3
5	42917340	43017340	2.66	PTPRB
7	82031816	82131816	2.66	ATG10
8	61811125	61911125	2.66	DCAF10，EXOSC3，TRMT10B，FRMPD1
11	68191796	68291796	2.66	SNRNP27，MXD1，GMCL1
15	43092222	43192222	2.66	U6，IPO7，ZNF143
21	6222949	6322949	2.66	CERS3
29	35162548	35262548	2.66	NOT_FOUND
3	108972544	109072544	2.65	GRIK3
6	105339517	105439517	2.65	NOT_FOUND
12	51692296	51792296	2.65	NOT_FOUND
12	77292552	77392552	2.65	NOT_FOUND
13	61499431	61599431	2.65	XKR7，CCM2L，HCK
16	71640369	71740369	2.65	LPGAT1
19	39673058	39773058	2.65	RPL19，STAC2，CACNB1，FBXL20
1	14714934	14814934	2.64	NOT_FOUND
3	17271627	17371627	2.64	LELP1
10	59893853	59993853	2.64	HDC，GABPB1
10	71793972	71893972	2.64	RTN1
12	40592185	40692185	2.64	PCDH9
12	59792377	59892377	2.64	NOT_FOUND
14	25665994	25765994	2.64	NOT_FOUND
15	48692278	48792278	2.64	OR51F4，OR51F1，OR52R1，OR52R1FP
15	77492566	77592566	2.64	FNBP4，NUP160
16	13239785	13339785	2.64	NOT_FOUND
23	50699829	50799829	2.64	SERPINB9，SERPINB6
25	32640329	32740329	2.64	GTF2IRD2，RCC1L
29	35362550	35462550	2.64	NOT_FOUND
2	77070086	77170086	2.63	NOT_FOUND
2	114570461	114670461	2.63	NOT_FOUND
13	60599422	60699422	2.63	SOX12，TBC1D20，NRSN2，TRIB3，RBCK1
13	74599562	74699562	2.63	TNNC2，SPATA25，ZNF335，NEURL2，ZSWIM1，SNX21，CTSA，PLTP，PCIF1，ACOT8，ZSWIM3
16	55740210	55840210	2.63	GPR52
24	36837400	36937400	2.63	SNORA70，SMCHD1，METTL4，NDC80
1	58515372	58615372	2.62	U6，GRAMD1C
1	154116328	154216328	2.62	TBC1D5
3	16871623	16971623	2.62	S100A7
7	38831384	38931384	2.62	U6，PFN3，GRK6，F12，RGS14，SLC34A1，LMAN2
7	93331929	93431929	2.62	FAM172A
7	97631972	97731972	2.62	NOT_FOUND
8	30510812	30610812	2.62	NOT_FOUND
18	30961311	31061311	2.62	NOT_FOUND
8	59511102	59611102	2.61	UNC13B
8	65111158	65211158	2.61	ERP44，INVS
10	71493969	71593969	2.61	DAAM1
10	80294057	80394057	2.61	NOT_FOUND
17	62304852	62404852	2.61	BICDL1，ALDH2
1	105415841	105515841	2.6	NOT_FOUND
2	91170227	91270227	2.6	ICA1L，WDR12，CARF
4	28994637	29094637	2.6	ITGB8
7	107932075	108032075	2.6	FER
8	98611493	98711493	2.6	Metazoa_SRP，FRRS1L，TMEM245
11	83691951	83791951	2.6	NOT_FOUND
11	93492049	93592049	2.6	OR1J26，OR1J32，OR1J31，OR1J4E，OR1J33
19	44073102	44173102	2.6	ITGA2B，SLC25A39，GRN，SLC4A1，RUNDC3A，FAM171A2
22	49219017	49319017	2.6	DCAF1，RAD54L2
22	54919074	55019074	2.6	SLC6A11
24	18537217	18637217	2.6	NOT_FOUND
1	53015317	53115317	2.59	MYH15，HHLA2
1	148616273	148716273	2.59	MORC3，CHAF1B
3	89672351	89772351	2.59	PLPP3
5	31117222	31217222	2.59	KANSL2，LALBA
5	46117372	46217372	2.59	DYRK2
5	91217823	91317823	2.59	NOT_FOUND
7	63531631	63631631	2.59	NOT_FOUND
9	2116369	2216369	2.59	NOT_FOUND
10	46393718	46493718	2.59	FBXL22，USP3
10	58493839	58593839	2.59	TMOD2，TMOD3
11	52291637	52391637	2.59	NOT_FOUND
14	11665854	11765854	2.59	NOT_FOUND
18	15561157	15661157	2.59	ITFG1
20	20253866	20353866	2.59	PDE4D
23	14199464	14299464	2.59	NOT_FOUND
3	91672371	91772371	2.58	ACOT11
7	45931455	46031455	2.58	CDKN2AIPNL，CDKL3，UBE2B
7	97831974	97931974	2.58	NOT_FOUND
8	15610663	15710663	2.58	NOT_FOUND
8	86411371	86511371	2.58	AUH
10	30293557	30393557	2.58	ACTC1，AQR
20	4153705	4253705	2.58	SH3PXD2B
24	35337385	35437385	2.58	COLEC12
26	41635186	41735186	2.58	ATE1
1	14314930	14414930	2.57	NOT_FOUND
4	58894936	58994936	2.57	NOT_FOUND
4	75395101	75495101	2.57	NOT_FOUND
5	25717168	25817168	2.57	HNRNPA1，NFE2，COPZ1，CBX5
9	41516763	41616763	2.57	FOXO3
9	63016978	63116978	2.57	NOT_FOUND
11	3191146	3291146	2.57	TMEM131
11	57191686	57291686	2.57	NOT_FOUND
13	66899485	66999485	2.57	TTI1，RPRD1B
1	13714924	13814924	2.56	NOT_FOUND
1	132716114	132816114	2.56	STAG1
4	14094488	14194488	2.56	NOT_FOUND
6	78039244	78139244	2.56	NOT_FOUND
6	116939633	117039633	2.56	NOT_FOUND
9	103917387	104017387	2.56	DLL1，FAM120B
10	80094055	80194055	2.56	RAD51B
11	49791612	49891612	2.56	TCF7L1
14	67766415	67866415	2.56	NOT_FOUND
15	48792279	48892279	2.56	OR51H1，OR51A8B，OR51H8，OR51S1，OR51T5，OR51F2
26	19634966	19734966	2.56	HPSE2
2	69670012	69770012	2.55	INSIG2
2	112670442	112770442	2.55	CUL3
2	121770533	121870533	2.55	PTP4A2
5	91017821	91117821	2.55	NOT_FOUND
9	15416502	15516502	2.55	MYO6
11	62091735	62191735	2.55	NOT_FOUND
18	59861600	59961600	2.55	NOT_FOUND
20	32453988	32553988	2.55	NOT_FOUND
22	17118696	17218696	2.55	SETD5
6	33938803	34038803	2.54	CCSER1
6	101239476	101339476	2.54	MAPK10
7	53631532	53731532	2.54	FGF1
7	85731853	85831853	2.54	NOT_FOUND
9	37616724	37716724	2.54	NOT_FOUND
16	32339976	32439976	2.54	COX20，HNRNPU
16	60440257	60540257	2.54	TOR3A，ABL2
29	10562302	10662302	2.54	NOT_FOUND
3	83172286	83272286	2.53	U6，KANK4
6	49238956	49338956	2.53	NOT_FOUND
7	102332019	102432019	2.53	NOT_FOUND
11	56891683	56991683	2.53	U6
13	67599492	67699492	2.53	PPP1R16B
15	39192183	39292183	2.53	PTH，ARNTL，BTBD10
20	31453978	31553978	2.53	ZNF131，HMGCS1，NIM1K
23	47999802	48099802	2.53	SSR1，RREB1
1	14814935	14914935	2.52	NOT_FOUND
1	50015287	50115287	2.52	ALCAM
1	73615523	73715523	2.52	NOT_FOUND
2	13569451	13669451	2.52	NCKAP1
5	35617267	35717267	2.52	NELL2
6	96839432	96939432	2.52	NOT_FOUND
8	87011377	87111377	2.52	SYK
11	62891743	62991743	2.52	AFTPH
13	69299509	69399509	2.52	MAFB
14	64866386	64966386	2.52	VPS13B
16	47140124	47240124	2.52	RPL22，KCNAB2，CHD5
6	98439448	98539448	2.51	NOT_FOUND
7	74731743	74831743	2.51	NOT_FOUND
9	11416462	11516462	2.51	RIMS1
9	32816676	32916676	2.51	NOT_FOUND
10	95294207	95394207	2.51	NOT_FOUND
11	45691571	45791571	2.51	U5，UXS1
13	72799544	72899544	2.51	U6，TTPAL，HNF4A
15	40492196	40592196	2.51	MICAL2
24	4837080	4937080	2.51	NOT_FOUND
2	75770073	75870073	2.5	NOT_FOUND
3	19971654	20071654	2.5	HORMAD1，CTSS，GOLPH3L
5	6816979	6916979	2.5	NOT_FOUND
5	35017261	35117261	2.5	NOT_FOUND
6	92039384	92139384	2.5	NOT_FOUND
10	55093805	55193805	2.5	RAB27A，RSL24D1
17	1504244	1604244	2.5	TLL1
17	15404383	15504383	2.5	INPP4B
21	48223369	48323369	2.5	NOT_FOUND
2	54869864	54969864	2.49	NOT_FOUND
3	71472169	71572169	2.49	NOT_FOUND
4	56394911	56494911	2.49	DOCK4
4	72295070	72395070	2.49	ADAM22，STEAP4，SRI
5	32317234	32417234	2.49	TMEM106C，VDR
5	108617997	108717997	2.49	CACNA1C
8	39010897	39110897	2.49	PDCD1LG2，RIC1
8	62611133	62711133	2.49	TDRD7
10	61093865	61193865	2.49	SECISBP2L，COPS2
11	49991614	50091614	2.49	U6，KCMF1
11	86391978	86491978	2.49	ROCK2，E2F6
12	12691906	12791906	2.49	TNFSF11
14	26366001	26466001	2.49	CHD7
19	39973061	40073061	2.49	ERBB2，TCAP，PNMT，NEUROD2，PPP1R1B，PGAP3，STARD3
29	10162298	10262298	2.49	NOT_FOUND
1	2114808	2214808	2.48	IFNGR2，IFNAR1
3	98472439	98572439	2.48	TRABD2B
3	101972474	102072474	2.48	B4GALT2，CCDC24，SLC6A9
6	20938673	21038673	2.48	NOT_FOUND
6	96639430	96739430	2.48	NOT_FOUND
7	39131387	39231387	2.48	B4GALT7，N4BP3，RMND5B
8	6910576	7010576	2.48	GLRA3
9	62616974	62716974	2.48	ZNF292
10	81794072	81894072	2.48	SLC8A3
11	52891643	52991643	2.48	NOT_FOUND
12	30992089	31092089	2.48	MTUS2
13	48499301	48599301	2.48	NOT_FOUND
14	23165969	23265969	2.48	LYN
15	13491926	13591926	2.48	NOT_FOUND
18	36061362	36161362	2.48	TANGO6，CDH1
19	43473096	43573096	2.48	MEOX1
25	12540128	12640128	2.48	NOT_FOUND
25	12640129	12740129	2.48	NOT_FOUND
25	27140274	27240274	2.48	STX1B，VKORC1，PRSS36，PRSS8，BCKDK，PRSS53，STX4，ZNF668，ZNF646，KAT8
1	106915856	107015856	2.47	SCARNA7，KPNA4
1	132816115	132916115	2.47	STAG1
3	109272547	109372547	2.47	NOT_FOUND
7	108332079	108432079	2.47	NOT_FOUND
8	61711124	61811124	2.47	FRMPD1
10	36493619	36593619	2.47	INO80
10	56493819	56593819	2.47	WDR72
14	51866256	51966256	2.47	CSMD3
18	62961631	63061631	2.47	NOT_FOUND
21	7022957	7122957	2.47	MEF2A
22	54819073	54919073	2.47	U2，SLC6A11
4	80595153	80695153	2.46	SUGCT
5	108317994	108417994	2.46	DCP1B
6	101139475	101239475	2.46	MAPK10
7	86031856	86131856	2.46	NOT_FOUND
21	45423341	45523341	2.46	U6，PRORP
21	48023367	48123367	2.46	NOT_FOUND
6	102239486	102339486	2.45	NUDT9，HSD17B11
8	51511022	51611022	2.45	NOT_FOUND
9	68617034	68717034	2.45	NOT_FOUND
9	90617254	90717254	2.45	NOT_FOUND
10	94794202	94894202	2.45	NOT_FOUND
11	62791742	62891742	2.45	LGALSL
11	71591830	71691830	2.45	BABAM2
16	35740010	35840010	2.45	RGS7
22	42718952	42818952	2.45	FAM107A
26	22434994	22534994	2.45	NPM3，FGF8，FBXW4，OGA
5	31017221	31117221	2.44	SNORA2B，SNORA2C，KANSL2，TEX49，CCNT1
10	21693471	21793471	2.44	U6，C10H14orf119，CEBPE，ACIN1，SLC7A8
14	47466212	47566212	2.44	UTP23
21	29623183	29723183	2.44	CHRNA7
1	12114908	12214908	2.43	NOT_FOUND
1	137916166	138016166	2.43	NOT_FOUND
2	91770233	91870233	2.43	NOT_FOUND
5	25217163	25317163	2.43	MUCL1
6	37438838	37538838	2.43	LCORL
7	75331749	75431749	2.43	NOT_FOUND
11	40491519	40591519	2.43	NOT_FOUND
14	465742	565742	2.43	FOXH1，VPS28，SLC39A4，KIFC2，ADCK5，TONSL，CYHR1，CPSF1，
17	55804787	55904787	2.43	TMEM233，CCDC60
27	8315159	8415159	2.43	NEIL3
2	111470430	111570430	2.42	U6
3	98972444	99072444	2.42	CYP4X1，TAL1，STIL，PDZK1IP1
5	55917470	56017470	2.42	INHBE，DDIT3，MBD6，INHBC，ARHGAP9，GLI1，DCTN2，KIF5A，MARS1
9	9516443	9616443	2.42	FAM135A
9	55716905	55816905	2.42	U6
21	10122988	10222988	2.42	NOT_FOUND
26	12434894	12534894	2.42	ANKRD1，RPP30，HTR7
1	4114828	4214828	2.41	TIAM1
2	7969395	8069395	2.41	U6
6	33138795	33238795	2.41	NOT_FOUND
8	75211259	75311259	2.41	NOL6，UBE2R2
10	30093555	30193555	2.41	NOT_FOUND
10	44293697	44393697	2.41	FRMD6
12	71392493	71492493	2.41	NOT_FOUND
13	7998896	8098896	2.41	NOT_FOUND
14	11965857	12065857	2.41	NOT_FOUND
16	60340256	60440256	2.41	TOR3A，FAM20B
16	61140264	61240264	2.41	U6，TOR1AIP1，CEP350
20	70954373	71054373	2.41	LPCAT1
22	14018665	14118665	2.41	ULK4
22	14918674	15018674	2.41	CYP8B1，ACKR2
24	14137173	14237173	2.41	NOT_FOUND
3	93372388	93472388	2.4	ZYG11A，SCP2，ECHDC2
4	61594963	61694963	2.4	U6
5	29317204	29417204	2.4	DIP2B
5	49317404	49417404	2.4	C5H12orf56，XPOT
7	19731193	19831193	2.4	SH3GL1，EBI3，TMIGD2，SHD，MPND，FSD1，STAP2，YJU2，
13	49999316	50099316	2.4	NOT_FOUND
28	40697184	40797184	2.4	GRID1
3	9271547	9371547	2.39	COPA，VANGL2，NCSTN
6	82139285	82239285	2.39	NOT_FOUND
7	41831414	41931414	2.39	OR2T22
11	46691581	46791581	2.39	IL36A，IL1F10，IL36RN，IL36B
13	46799284	46899284	2.39	DIP2C，ZMYND11
16	8739740	8839740	2.39	NOT_FOUND
17	1404243	1504243	2.39	NOT_FOUND
17	38004609	38104609	2.39	NOT_FOUND
19	51673178	51773178	2.39	U1，CHMP6，RPTOR
22	19318718	19418718	2.39	GRM7
11	19891313	19991313	2.38	NOT_FOUND
11	87591990	87691990	2.38	TAF1B，GRHL1
13	66799484	66899484	2.38	TTI1，VSTM2L
14	14665884	14765884	2.38	NOT_FOUND
17	13204361	13304361	2.38	ANAPC10
18	44661448	44761448	2.38	U1，GARRE1
21	32723214	32823214	2.38	LINGO1
1	2414811	2514811	2.37	OLIG1
1	49815285	49915285	2.37	NOT_FOUND
1	103715824	103815824	2.37	NOT_FOUND
3	38671841	38771841	2.37	NOT_FOUND
3	84072295	84172295	2.37	NOT_FOUND
4	13894486	13994486	2.37	NOT_FOUND
7	77331769	77431769	2.37	NOT_FOUND
10	44993704	45093704	2.37	NOT_FOUND
12	25292032	25392032	2.37	SOHLH2
14	565743	665743	2.37	SCX，TMEM249，SLC52A2，FBXL6，ADCK5，SCRT1，DGAT1，MROH1，BOP1，HSF1
14	24365981	24465981	2.37	FAM110B
14	30166039	30266039	2.37	NOT_FOUND
14	65066388	65166388	2.37	VPS13B
16	18939842	19039842	2.37	USH2A
17	15104380	15204380	2.37	NOT_FOUND
22	4418569	4518569	2.37	RBMS3
26	2134791	2234791	2.37	NOT_FOUND
1	7114858	7214858	2.36	RWDD2B，CCT8，USP16，LTN1
2	62269938	62369938	2.36	ACMSD，CCNT2，MAP3K19
4	69895046	69995046	2.36	MIR148A
8	43810945	43910945	2.36	KANK1
8	54211049	54311049	2.36	PSAT1
9	41116759	41216759	2.36	U12，ARMC2，SESN1
13	38499201	38599201	2.36	SMIM26，RBBP9，POLR3F，SEC23B，DZANK1
13	73299549	73399549	2.36	PABPC1L，TOMM34，YWHAB，STK4
14	47666214	47766214	2.36	EIF3H
18	22461226	22561226	2.36	FTO
19	51073172	51173172	2.36	NPLOC4，ARL16，PDE6G，OXLD1，TSPAN10，MRPL12，CCDC137，SLC25A10，HGS
3	18371638	18471638	2.35	NOT_FOUND
4	61894966	61994966	2.35	DPY19L1，DPY19L2
5	118518096	118618096	2.35	NOT_FOUND
6	76239226	76339226	2.35	NOT_FOUND
7	91731913	91831913	2.35	NOT_FOUND
20	3953703	4053703	2.35	EFCAB9，STK10，UBTD2
27	16715243	16815243	2.35	NOT_FOUND
1	14414931	14514931	2.34	NOT_FOUND
1	106815855	106915855	2.34	ARL14
2	1969335	2069335	2.34	PLEKHB2
2	64369959	64469959	2.34	NCKAP5
3	76772222	76872222	2.34	DEPDC1，RPE65
4	14394491	14494491	2.34	DLX6，DLX5，SDHAF3
9	65116999	65216999	2.34	CEP162
10	69293947	69393947	2.34	NOT_FOUND
11	13891253	13991253	2.34	TGFA
13	40799224	40899224	2.34	NOT_FOUND
13	63899455	63999455	2.34	MAP1LC3A，DYNLRB1，PIGU
14	39566133	39666133	2.34	NOT_FOUND
17	1704246	1804246	2.34	TLL1
17	20404433	20504433	2.34	NOT_FOUND
17	54904778	55004778	2.34	CUX2
20	26853932	26953932	2.34	NOT_FOUND
26	23535005	23635005	2.34	CNNM2
1	70815495	70915495	2.33	TM4SF19，SLC51A，DYNLT2B，PCYT1A
1	126916056	127016056	2.33	TFDP2
7	47131467	47231467	2.33	NOT_FOUND
8	57811085	57911085	2.33	NOT_FOUND
8	73911246	74011246	2.33	ADRA1A
9	42916777	43016777	2.33	MTRES1，BEND3
10	69393948	69493948	2.33	NOT_FOUND
11	66691781	66791781	2.33	PLEK，CNRIP1
13	60999426	61099426	2.33	DEFB121，DEFB124，DEFB122A，DEFB122，REM1，DEFB123
21	32523212	32623212	2.33	PEAK1，HMG20A
24	8137113	8237113	2.33	CCDC102B
3	62772082	62872082	2.32	ADGRL2
5	32517236	32617236	2.32	ENDOU，RAPGEF3，RPAP3
8	52711034	52811034	2.32	PRUNE2
9	41416762	41516762	2.32	NOT_FOUND
14	52366261	52466261	2.32	NOT_FOUND
18	22361225	22461225	2.32	FTO
18	29761299	29861299	2.32	CDH8
26	44435214	44535214	2.32	ZRANB1
2	9169407	9269407	2.31	NOT_FOUND
3	108772542	108872542	2.31	GRIK3
4	57194919	57294919	2.31	LRRN3，IMMP2L
4	100995357	101095357	2.31	DGKI
6	39538859	39638859	2.31	NOT_FOUND
8	61411121	61511121	2.31	ZCCHC7
9	3716385	3816385	2.31	NOT_FOUND
13	39699213	39799213	2.31	CFAP61
13	46399280	46499280	2.31	LARP4B
13	68699503	68799503	2.31	NOT_FOUND
17	55504784	55604784	2.31	CIT
23	29399616	29499616	2.31	OR2H18，OR2G1，OR2B4，OR14J12，OR14J1，OR2B37，OR2H20
27	33315409	33415409	2.31	U6，STAR，LSM1，BAG4，DDHD2
1	75615543	75715543	2.3	NOT_FOUND
1	83215619	83315619	2.3	YEATS2，MAP6D1，PARL
2	10969425	11069425	2.3	NOT_FOUND
2	79470110	79570110	2.3	STAT4，GLS，STAT1
3	8671541	8771541	2.3	LY9，CD244
5	111718028	111818028	2.3	SGSM3，MRTFA
6	38938853	39038853	2.3	NOT_FOUND
6	76439228	76539228	2.3	NOT_FOUND
8	54411051	54511051	2.3	NOT_FOUND
8	78511292	78611292	2.3	NOT_FOUND
13	63799454	63899454	2.3	DYNLRB1，ITCH
18	24161243	24261243	2.3	U6，GNAO1，NUDT21，OGFOD1，AMFR
22	30118826	30218826	2.3	NOT_FOUND
23	14299465	14399465	2.3	U6，LRFN2
1	11814905	11914905	2.29	NOT_FOUND
3	17071625	17171625	2.29	S100A8，S100A12，S100A9，PGLYRP3，PGLYRP4
3	71772172	71872172	2.29	NOT_FOUND
5	46217373	46317373	2.29	NOT_FOUND
6	72739191	72839191	2.29	NOT_FOUND
7	18131177	18231177	2.29	MLLT1
8	69211199	69311199	2.29	DOK2，XPO7
9	31616664	31716664	2.29	MAN1A1
9	43216780	43316780	2.29	QRSL1
10	52593780	52693780	2.29	MYZAP
13	46599282	46699282	2.29	DIP2C
13	69799514	69899514	2.29	PLCG1，ZHX3
14	26666004	26766004	2.29	U6
15	48292274	48392274	2.29	U1，OR51B20P，HBE2，HBE4，HBB，HBE1
16	57240225	57340225	2.29	COP1
16	58440237	58540237	2.29	BRINP2
27	16815244	16915244	2.29	NOT_FOUND
28	29797075	29897075	2.29	PLAU，VCL
2	65669972	65769972	2.28	NOT_FOUND
5	82317734	82417734	2.28	U6，PPFIBP1
8	106511572	106611572	2.28	ASTN2
9	62816976	62916976	2.28	U6，HTR1E
12	41592195	41692195	2.28	NOT_FOUND
19	46873130	46973130	2.28	METTL2A，TLK2
1	133916126	134016126	2.27	NOT_FOUND
4	43994787	44094787	2.27	FGL2，FAM185A，CCDC146
6	78639250	78739250	2.27	NOT_FOUND
11	51491629	51591629	2.27	NOT_FOUND
13	30899125	30999125	2.27	C1QL3，PTER
14	19765935	19865935	2.27	CLXN
16	71140364	71240364	2.27	PACC1，PPP2R5A
22	15718682	15818682	2.27	NOT_FOUND
23	13799460	13899460	2.27	DAAM2，MOCS1
28	28797065	28897065	2.27	U6，MCU
29	36862565	36962565	2.27	SNX19
2	10769423	10869423	2.26	U1
4	44994797	45094797	2.26	RELN
6	103339497	103439497	2.26	EVC，CRMP1
9	10316451	10416451	2.26	OGFRL1
9	41816766	41916766	2.26	AFG1L，SNX3
9	75017098	75117098	2.26	IL22RA2，IFNGR1
11	49091605	49191605	2.26	ATOH8
12	50892288	50992288	2.26	LMO7
13	46899285	46999285	2.26	ZMYND11
13	69099507	69199507	2.26	U6
15	76792559	76892559	2.26	CSTPP1，LRP4
19	52273184	52373184	2.26	NOT_FOUND
22	45118976	45218976	2.26	ERC2
29	17762374	17862374	2.26	KCTD21，GAB2，USP35
1	50115288	50215288	2.25	ALCAM
4	54994897	55094897	2.25	NOT_FOUND
6	53639000	53739000	2.25	NOT_FOUND
6	92839392	92939392	2.25	NOT_FOUND
7	86131857	86231857	2.25	NOT_FOUND
9	42816776	42916776	2.25	BEND3，PDSS2
10	30193556	30293556	2.25	GJD2，ACTC1
10	61293867	61393867	2.25	EID1，SHC4
10	87094125	87194125	2.25	TTLL5
11	46791582	46891582	2.25	PSD4，IL1RN
12	4991829	5091829	2.25	NOT_FOUND
19	51473176	51573176	2.25	NDUFAF8，SLC38A10，TEPSIN，CEP131，AATK
28	25397031	25497031	2.25	SRGN
3	89872353	89972353	2.24	NOT_FOUND
6	87939343	88039343	2.24	NOT_FOUND
10	71693971	71793971	2.24	GPR135，RTN1，L3HYPDH，JKAMP
13	66599482	66699482	2.24	CTNNBL1
15	39492186	39592186	2.24	NOT_FOUND
18	1861020	1961020	2.24	GLG1，PDPR
20	65854322	65954322	2.24	NOT_FOUND
22	20918734	21018734	2.24	NOT_FOUND
3	78972244	79072244	2.23	PDE4B
3	99272447	99372447	2.23	CYP4A22，CYP4B1
4	16194509	16294509	2.23	ICA1
4	23994587	24094587	2.23	MEOX2
8	106311570	106411570	2.23	ASTN2
9	71717065	71817065	2.23	EYA4
10	66093915	66193915	2.23	U6
11	78491899	78591899	2.23	PUM2
15	32592117	32692117	2.23	NOT_FOUND
16	50440157	50540157	2.23	PEX10，RER1，SKI，MORN1
18	43961441	44061441	2.23	CHST8
21	7922966	8022966	2.23	IGF1R
23	45799780	45899780	2.23	NOT_FOUND
1	15614943	15714943	2.22	NOT_FOUND
2	47869794	47969794	2.22	PTMA
7	66731663	66831663	2.22	NOT_FOUND
8	108111588	108211588	2.22	NOT_FOUND
11	9391208	9491208	2.22	TACR1
12	78392563	78492563	2.22	NOT_FOUND
13	39299209	39399209	2.22	SLC24A3，RIN2
13	58599402	58699402	2.22	CTCFL，PCK1
18	47261474	47361474	2.22	ZNF383
19	38673048	38773048	2.22	TBX21，TBKBP1
20	14453808	14553808	2.22	CWC27
21	57023457	57123457	2.22	SLC24A4
23	13399456	13499456	2.22	KIF6
28	8896866	8996866	2.22	GPR137B，ERO1B
1	120015987	120115987	2.21	NOT_FOUND
2	35769673	35869673	2.21	RBMS1
3	14671601	14771601	2.21	LAMTOR2，MEX3A，SSR2，RAB25，UBQLN4
4	42194769	42294769	2.21	NOT_FOUND
6	98639450	98739450	2.21	U6
7	64331639	64431639	2.21	NOT_FOUND
9	18216530	18316530	2.21	NOT_FOUND
10	58193836	58293836	2.21	U6，GNB5
11	91092025	91192025	2.21	NOT_FOUND
15	1591807	1691807	2.21	AASDHPPT，KBTBD3
22	50319028	50419028	2.21	CAMKV，MON1A，MST1R，RBM6，TRAIP
25	38040383	38140383	2.21	ANKRD61，CYTH3，EIF2AK1，USP42
27	8415160	8515160	2.21	NEIL3
2	11169427	11269427	2.2	NOT_FOUND
7	36931365	37031365	2.2	NOT_FOUND
7	67731673	67831673	2.2	SGCD
9	38316731	38416731	2.2	FAM229B，LAMA4，CCN6，TUBE1
10	53093785	53193785	2.2	NOT_FOUND
11	59591710	59691710	2.2	NOT_FOUND
12	23992019	24092019	2.2	TRPC4
12	65892438	65992438	2.2	GPC5
13	57499391	57599391	2.2	GNAS
13	68599502	68699502	2.2	NOT_FOUND
16	79140444	79240444	2.2	U6，KIF14
18	37861380	37961380	2.2	NOT_FOUND
24	8637118	8737118	2.2	NOT_FOUND
3	21571670	21671670	2.19	RNF115
3	71572170	71672170	2.19	NOT_FOUND
9	54016888	54116888	2.19	NOT_FOUND
10	54593800	54693800	2.19	PRTG
10	63493889	63593889	2.19	NOT_FOUND
10	73593990	73693990	2.19	PRKCH
13	69199508	69299508	2.19	NOT_FOUND
14	10265840	10365840	2.19	ASAP1
19	43773099	43873099	2.19	PPY，PYY2，PYY，TMEM101，NAGS，MPP2
19	48773149	48873149	2.19	SMURF2
21	27223159	27323159	2.19	NOT_FOUND
26	16234932	16334932	2.19	NOT_FOUND
28	23897016	23997016	2.19	CTNNA3
1	97215759	97315759	2.18	U6，GPR160，PHC3
2	47469790	47569790	2.18	U6，EPC2
7	63631632	63731632	2.18	NMUR2
8	105911566	106011566	2.18	ASTN2
9	53816886	53916886	2.18	NOT_FOUND
13	70899525	70999525	2.18	PTPRT
14	17165909	17265909	2.18	NOT_FOUND
14	24265980	24365980	2.18	FAM110B
15	39292184	39392184	2.18	ARNTL
24	38137413	38237413	2.18	NOT_FOUND
26	38135151	38235151	2.18	NOT_FOUND
29	13162328	13262328	2.18	NOT_FOUND
1	13414921	13514921	2.17	NOT_FOUND
1	129416081	129516081	2.17	NOT_FOUND
1	141216199	141316199	2.17	NOT_FOUND
2	119770513	119870513	2.17	DIS3L2
3	31571770	31671770	2.17	INKA2，RAP1A
3	83272287	83372287	2.17	KANK4
3	99072445	99172445	2.17	CYP4X1
11	38091495	38191495	2.17	CCDC88A
11	39291507	39391507	2.17	NOT_FOUND
11	56991684	57091684	2.17	NOT_FOUND
12	22292002	22392002	2.17	NOT_FOUND
18	6561067	6661067	2.17	NOT_FOUND
19	40373065	40473065	2.17	NR1D1，MSL1，RAPGEFL1，THRA，CASC3
20	30853972	30953972	2.17	NOT_FOUND
26	50835278	50935278	2.17	NKX6-2
29	7062267	7162267	2.17	GRM5
2	25369569	25469569	2.16	TLK1
7	6931065	7031065	2.16	OR2Z11，OR1AB2
9	12916477	13016477	2.16	EEF1A1，MTO1，CGAS
9	57616924	57716924	2.16	NOT_FOUND
9	76117109	76217109	2.16	HEBP2，NHSL1，ARFGEF3
10	79094045	79194045	2.16	GPHN，GARIN2，PALS1
14	4665784	4765784	2.16	NOT_FOUND
18	20961211	21061211	2.16	TOX3
19	27572937	27672937	2.16	TRAPPC1，RNF227，KCNAB3，GUCY2D，CNTROB，CHD3
19	53973201	54073201	2.16	SYNGR2，AFMID，TMC8，TK1，TNRC6C，TMC6
20	15053814	15153814	2.16	RNF180
20	51854182	51954182	2.16	NOT_FOUND
23	1799340	1899340	2.16	NOT_FOUND
27	4515121	4615121	2.16	NOT_FOUND
1	84515632	84615632	2.15	NOT_FOUND
4	9394441	9494441	2.15	LRRD1，CYP51A1，AKAP9
5	13617047	13717047	2.15	NOT_FOUND
5	42017331	42117331	2.15	NOT_FOUND
6	82839292	82939292	2.15	NOT_FOUND
9	3216380	3316380	2.15	NOT_FOUND
14	32366061	32466061	2.15	C14H8orf34
18	55561557	55661557	2.15	TRPM4，LHB，KCNA7，NTF4，LIN7B，SNRNP70，HRC，RUVBL2，PPFIA3
1	58715374	58815374	2.14	CCDC191，DRD3，QTRT2
2	6369379	6469379	2.14	PMS1
2	80170117	80270117	2.14	NABP1
3	92172376	92272376	2.14	TCEANC2，HSPB11，LDLRAD1，LRRC42，TMEM59
6	102639490	102739490	2.14	PPP2R2C
7	65431650	65531650	2.14	GALNT10
8	60711114	60811114	2.14	RNF38，MELK
8	78211289	78311289	2.14	NTRK2
9	45116799	45216799	2.14	HACE1
9	62416972	62516972	2.14	RARS2，SLC35A1，CFAP206
11	24891363	24991363	2.14	U6，MTA3
12	58092360	58192360	2.14	NOT_FOUND
13	12198938	12298938	2.14	NUDT5，SEC61A2，DHTKD1
14	28266020	28366020	2.14	NOT_FOUND
14	32066058	32166058	2.14	PREX2
14	64066378	64166378	2.14	RNF19A
16	48740140	48840140	2.14	NOT_FOUND
2	9569411	9669411	2.13	ITGAV，FAM171B
4	16594513	16694513	2.13	NOT_FOUND
4	29794645	29894645	2.13	NOT_FOUND
4	78295130	78395130	2.13	NOT_FOUND
6	103939503	104039503	2.13	STK32B
7	69631692	69731692	2.13	NOT_FOUND
8	58311090	58411090	2.13	NOT_FOUND
9	51416862	51516862	2.13	NOT_FOUND
10	99594250	99694250	2.13	GALC
13	61799434	61899434	2.13	NOL4L，ASXL1
14	23865976	23965976	2.13	BPNT2
14	31266050	31366050	2.13	CSPP1，ARFGEF1
18	53361535	53461535	2.13	NANOS2，FOXA3，MYPOP，NOVA2，SYMPK
21	13423021	13523021	2.13	NOT_FOUND
1	56715354	56815354	2.12	PHLDB2，ABHD10，TAGLN3
3	47071925	47171925	2.12	NOT_FOUND
8	43310940	43410940	2.12	NOT_FOUND
8	89211399	89311399	2.12	NOT_FOUND
16	66640319	66740319	2.12	HMCN1
17	61504844	61604844	2.12	NOT_FOUND
18	58161583	58261583	2.12	NOT_FOUND
29	26562462	26662462	2.12	U6，SNORA71，OR10S1，OR8D4，OR8B72，OR10G6，OR4D5，OR10G9G，
2	11769433	11869433	2.11	NOT_FOUND
3	79372248	79472248	2.11	PDE4B，MGC137454
4	94295290	94395290	2.11	COPG2
5	9217003	9317003	2.11	PPP1R12A，PAWR
7	4631042	4731042	2.11	FKBP8，ELL
7	91331909	91431909	2.11	NOT_FOUND
8	7210579	7310579	2.11	NOT_FOUND
8	83611343	83711343	2.11	U6
10	60993864	61093864	2.11	COPS2，GALK2
13	50099317	50199317	2.11	NOT_FOUND
13	51499331	51599331	2.11	GFRA4，SIGLEC1，ADAM33，ATRN
13	73199548	73299548	2.11	YWHAB，RIMS4
14	25565993	25665993	2.11	NOT_FOUND
15	40292194	40392194	2.11	MICAL2，PARVA
15	53492326	53592326	2.11	PPME1，C2CD3
19	2972691	3072691	2.11	NOT_FOUND
21	41223299	41323299	2.11	G2E3，SCFD1
22	24018765	24118765	2.11	NOT_FOUND
1	9714884	9814884	2.1	NOT_FOUND
1	84915636	85015636	2.1	NOT_FOUND
2	93470250	93570250	2.1	PARD3B
4	97495322	97595322	2.1	EXOC4
5	100517916	100617916	2.1	KLRB1
6	71239176	71339176	2.1	EXOC1，EXOC1L
7	22831224	22931224	2.1	RAPGEF6
7	70031696	70131696	2.1	NOT_FOUND
10	50793762	50893762	2.1	FAM81A
10	77894033	77994033	2.1	NOT_FOUND
11	36191476	36291476	2.1	NOT_FOUND
11	41491529	41591529	2.1	NOT_FOUND
14	18965927	19065927	2.1	NOT_FOUND
15	12291914	12391914	2.1	NOT_FOUND
15	83092622	83192622	2.1	OOSP2，MS4A7，MS4A2，MS4A3
20	31353977	31453977	2.1	HMGCS1，CCL28
29	31562512	31662512	2.1	NOT_FOUND
1	66715454	66815454	2.09	CSTA，MIX23，CASR
3	91572370	91672370	2.09	U6，MROH7
4	107895426	107995426	2.09	TPK1
5	76217673	76317673	2.09	SYT10
7	97531971	97631971	2.09	NOT_FOUND
8	86911376	87011376	2.09	SYK
10	95494209	95594209	2.09	NOT_FOUND
11	36991484	37091484	2.09	ACYP2，C11H2orf73
12	51792297	51892297	2.09	NOT_FOUND
15	1891810	1991810	2.09	GRIA4
18	45261454	45361454	2.09	NOT_FOUND
27	34115417	34215417	2.09	TM2D2，PLEKHA2，HTRA4，ADAM9
2	77670092	77770092	2.08	NOT_FOUND
2	96770283	96870283	2.08	NOT_FOUND
3	75672211	75772211	2.08	NOT_FOUND
3	97972434	98072434	2.08	SKINT1，SLC5A9
7	78031776	78131776	2.08	U6
7	103832034	103932034	2.08	U6
8	40710914	40810914	2.08	NOT_FOUND
8	87911386	88011386	2.08	NOT_FOUND
10	35293607	35393607	2.08	FSIP1
10	51393768	51493768	2.08	U6，MINDY2
10	67393928	67493928	2.08	GCH1，WDHD1
11	38191496	38291496	2.08	PPP4R3B，CFAP36
16	24939902	25039902	2.08	NOT_FOUND
16	61240265	61340265	2.08	CEP350
18	35961361	36061361	2.08	CDH1，CDH3
20	20453868	20553868	2.08	RAB3C
21	29323180	29423180	2.08	NOT_FOUND
23	13299455	13399455	2.08	KIF6
27	8215158	8315158	2.08	NOT_FOUND
29	24862445	24962445	2.08	NAV2
29	37162568	37262568	2.08	TMEM132A，TMEM109，PTGDR2，CCDC86，PRPF19
2	13669452	13769452	2.07	U6，FRZB
2	111070426	111170426	2.07	ACSL3
2	123670552	123770552	2.07	NOT_FOUND
2	131770633	131870633	2.07	HP1BP3，EIF4G3
4	51994867	52094867	2.07	NOT_FOUND
4	61494962	61594962	2.07	NOT_FOUND
5	81217723	81317723	2.07	CCDC91
6	22538689	22638689	2.07	SLC39A8
6	75939223	76039223	2.07	NOT_FOUND
6	100239466	100339466	2.07	NOT_FOUND
9	92517273	92617273	2.07	NOT_FOUND
12	11191891	11291891	2.07	SNORA70，WBP4，MTRF1，ELF1
16	48540138	48640138	2.07	AJAP1
17	53704766	53804766	2.07	RNF34，KDM2B
21	7422961	7522961	2.07	TTC23
22	12318648	12418648	2.07	WDR48
25	18440187	18540187	2.07	THUMPD1，ACSM4，ACSM3
25	18740190	18840190	2.07	DNAH3
1	52715314	52815314	2.06	CD47
3	31271767	31371767	2.06	KCND3
8	32310830	32410830	2.06	NOT_FOUND
8	78411291	78511291	2.06	NOT_FOUND
10	72193976	72293976	2.06	LRRC9
13	56599382	56699382	2.06	PPP1R3D，PHACTR3，FAM217B，SYCP2
13	65899475	65999475	2.06	TLDC2，SAMHD1
14	16165899	16265899	2.06	KLHL38，ANXA13
15	2591817	2691817	2.06	NOT_FOUND
15	52692318	52792318	2.06	P2RY6，P2RY2
18	1961021	2061021	2.06	GLG1
19	37173033	37273033	2.06	PHB1，ZNF652
22	31518840	31618840	2.06	MITF
28	25097028	25197028	2.06	DDX50，STOX1
1	12614913	12714913	2.05	NOT_FOUND
1	15114938	15214938	2.05	NOT_FOUND
1	130716094	130816094	2.05	NME9，MRAS
2	31369629	31469629	2.05	U6，COBLL1
3	79772252	79872252	2.05	LEPR
5	1416925	1516925	2.05	TBC1D15
5	80717718	80817718	2.05	NOT_FOUND
6	11138575	11238575	2.05	NOT_FOUND
6	98339447	98439447	2.05	GPAT3
7	86231858	86331858	2.05	NOT_FOUND
7	107832074	107932074	2.05	FER
9	1416362	1516362	2.05	NOT_FOUND
9	17316521	17416521	2.05	MEI4
10	81594070	81694070	2.05	U6，SMOC1
15	32392115	32492115	2.05	NOT_FOUND
16	25039903	25139903	2.05	NOT_FOUND
17	51204741	51304741	2.05	NCOR2
21	48423371	48523371	2.05	NOT_FOUND
29	36662563	36762563	2.05	NOT_FOUND
1	135416141	135516141	2.04	SLCO2A1，RAB6B
2	90670222	90770222	2.04	SUMO1，KIAA2012
4	12294470	12394470	2.04	PPP1R9A
4	88495232	88595232	2.04	NOT_FOUND
6	50438968	50538968	2.04	NOT_FOUND
6	76039224	76139224	2.04	NOT_FOUND
8	14910656	15010656	2.04	NOT_FOUND
8	57711084	57811084	2.04	NOT_FOUND
8	71311220	71411220	2.04	NOT_FOUND
8	98111488	98211488	2.04	NOT_FOUND
8	103211539	103311539	2.04	KIF12，ZNF618
10	8693341	8793341	2.04	OTP
10	57893833	57993833	2.04	MYO5A
11	61491729	61591729	2.04	OTX1，EHBP1
11	96092075	96192075	2.04	HSPA5，RABEPK，GAPVD1
12	59492374	59592374	2.04	NOT_FOUND
12	77992559	78092559	2.04	ITGBL1
13	8498901	8598901	2.04	NOT_FOUND
13	15498971	15598971	2.04	NOT_FOUND
13	21699033	21799033	2.04	PLXDC2
13	69499511	69599511	2.04	NOT_FOUND
14	52666264	52766264	2.04	NOT_FOUND
15	44892240	44992240	2.04	OR5P1C，OR5P4，OR5P5，OR5P76B，OR10AB2，OR5P90P
17	29804527	29904527	2.04	SLC25A31，HSPA4L
18	50061502	50161502	2.04	CYP2F1
19	47273134	47373134	2.04	NOT_FOUND
20	59154255	59254255	2.04	U6，DNAH5

## Sheet: Table S6
Table S6. A summary of genes from CLR in CRS.
Chromosome	Starting position	Ending position	CLR	Gene
3	28383126	28483126	43.7807	SYCP1，U6
3	28483975	28583975	35.0565	CSDE1，SIKE1，SYCP1
3	28282277	28382277	32.3433	SYCP1，TSHB，TSPAN2
16	49039209	49139209	23.2839	NOT_FOUND
3	26971239	27071239	16.24	NOT_FOUND
3	29189918	29289918	16.1186	SYT6
6	95347923	95447923	15.5279	CFAP299
14	570458	670458	15.2931	ADCK5，BOP1，DGAT1，FBXL6，HSF1，MROH1，SCRT1，SCX，SLC52A2，TMEM249
3	27475484	27575484	15.0292	CASQ2，NHLH2
21	31954712	32054712	14.0717	RCN2，SCAPER
14	22878513	22978513	14.0095	XKR4
16	43090519	43190519	13.8707	CENPS，CORT，DFFA，PEX14，PGD
3	26870390	26970390	13.3705	ATP1A1
14	41870506	41970506	12.5278	IL7，ZC2HC1A
9	61114031	61214031	12.3803	RNGTT
3	27273786	27373786	11.9919	SLC22A15
17	39348504	39448504	11.9211	NOT_FOUND
2	134986806	135086806	11.724	ARHGEF10L
21	31652178	31752178	11.5951	NOT_FOUND
9	61214442	61314442	11.4957	RNGTT
16	43493820	43593820	11.4894	NMNAT1，RBP7，UBE4B
1	106934868	107034868	11.2207	KPNA4，SCARNA7，TRIM59
16	43292169	43392169	10.956	U6，UBE4B
21	32055556	32155556	10.9559	PSTPIP1，RCN2
16	43796295	43896295	10.9238	PIK3CD，TMEM201，U6
6	95448572	95548572	10.677	CFAP299
7	40147130	40247130	10.5917	OR2O2，OR2T26，OR2T61，OR2V1
3	19810955	19910955	10.5318	ARNT，SETDB1
6	91321965	91421965	10.3403	SHROOM3
7	66072468	66172468	10.3107	GEMIN5，MRPL22
12	11518812	11618812	10.304	NAA16，RGCC
6	96153114	96253114	10.2882	RASGEF1B，SNORA70
10	70730724	70830724	9.83365	KIAA0586
16	42485567	42585567	9.75801	EXOSC10，MASP2，MTOR，SRM
12	56430406	56530406	9.74807	NOT_FOUND
17	31227250	31327250	9.39049	NOT_FOUND
7	40247616	40347616	9.33548	OR2V2，OR2V2D，TRIM7
17	56192587	56292587	9.30693	SRRM4
10	54894029	54994029	9.22485	CCPG1，DNAAF4，PIERCE2，PIGB
19	52804827	52904827	9.21743	NOT_FOUND
3	19911804	20011804	9.17084	ARNT，CTSK，CTSS
10	44870804	44970804	9.16343	NID2
7	66172954	66272954	9.15637	U6
18	57212393	57312393	9.13663	NOT_FOUND
22	20407248	20507248	9.13498	NOT_FOUND
6	100481019	100581019	9.06397	NOT_FOUND
20	4956287	5056287	9.05736	STC2
25	17866211	17966211	8.97843	NOT_FOUND
3	27878880	27978880	8.87937	NGF
11	56798596	56898596	8.56712	NOT_FOUND
1	13947314	14047314	8.48696	NOT_FOUND
17	38145355	38245355	8.41842	NOT_FOUND
19	52503045	52603045	8.38169	CCDC40，TBC1D16
18	52164522	52264522	8.18563	ZNF112，ZNF227，ZNF235
29	548949	648949	8.16339	PANX1
10	64315860	64415860	8.0877	NOT_FOUND
21	31853867	31953867	8.08252	SCAPER
21	45165357	45265357	8.0663	BAZ1A
19	44757301	44857301	8.02294	ACBD4，HEXIM1，HEXIM2，NMT1，PLCD3
21	45064512	45164512	8.00109	BAZ1A，CFL2
10	71031421	71131421	7.98329	NOT_FOUND
10	12094858	12194858	7.96361	CLPX，PARP16
3	15071049	15171049	7.9602	ASH1L，DAP3
3	14667653	14767653	7.91805	LAMTOR2，LMNA，MEX3A，RAB25，SSR2，UBQLN4
15	22539513	22639513	7.86439	BCO2，PTS
4	64437042	64537042	7.77942	NOT_FOUND
1	82938080	83038080	7.73131	ABCF3，AP2M1，DVL3，EIF2B5，VWA5B2
6	94844678	94944678	7.67281	PRDM8
17	56092325	56192325	7.65796	HSPB8，SRRM4
13	44053774	44153774	7.65118	NOT_FOUND
16	57811006	57911006	7.56635	PAPPA2
10	95287626	95387626	7.51778	NOT_FOUND
25	17966853	18066853	7.51773	GP2，PDILT，UMOD
21	2911462	3011462	7.4919	ATP10A，U6
12	51818947	51918947	7.47842	NOT_FOUND
6	95649870	95749870	7.27612	CFAP299
19	495906	595906	7.25684	CA10，U6
9	14422949	14522949	7.24274	NOT_FOUND
5	102854954	102954954	7.21771	NOT_FOUND
16	42586392	42686392	7.21514	MASP2，TARDBP
14	34032540	34132540	7.17994	NCOA2，U6
1	148729274	148829274	7.12939	CLDN14
10	53591010	53691010	7.11557	NOT_FOUND
7	16733938	16833938	7.05911	CCL25，ELAVL1，FBN3
1	82838093	82938093	7.05157	ALG3，CAMK2N2，CLCN2，ECE2，EIF4G1，FAM131A，PSMD2，SNORD66，VWA5B2
24	50594580	50694580	7.04988	MEX3C
1	82738107	82838107	7.04512	CHRD，CLCN2，POLR2H，THPO
16	17985029	18085029	7.01452	NOT_FOUND
1	106734895	106834895	6.99466	NOT_FOUND
3	119147282	119247282	6.96876	OR9S35P，OR9S43，OR9S43B
21	45871269	45971269	6.96737	RALGAPA1
16	48938384	49038384	6.9663	NOT_FOUND
23	42586637	42686637	6.87926	CD83
10	71231886	71331886	6.82103	NOT_FOUND
3	28584824	28684824	6.81346	AMPD1，CSDE1，DENND2C，NRAS
25	16960441	17060441	6.81317	TMC5，TMC7
5	56301716	56401716	6.80281	LRP1，MYO1A，NAB2，NEMP1，SNORA62，STAT6
1	99835818	99935818	6.80275	WDR49
3	18399068	18499068	6.80206	NOT_FOUND
1	107134841	107234841	6.7941	IFT80
22	45015137	45115137	6.76349	ERC2
3	36350202	36450202	6.75972	NOT_FOUND
27	38216525	38316525	6.67059	CSGALNACT1，SH2D4A
10	52789152	52889152	6.6548	CGNL1
19	596500	696500	6.63775	CA10
18	65288988	65388988	6.60537	ZNF814
1	148829261	148929261	6.58064	NOT_FOUND
9	14322538	14422538	6.53216	NOT_FOUND
10	99497380	99597380	6.48571	NOT_FOUND
3	102406337	102506337	6.48214	PTPRF
9	31291985	31391985	6.47791	NOT_FOUND
2	17710388	17810388	6.44794	CCDC141，SESTD1
27	39026670	39126670	6.41409	NOT_FOUND
10	71432350	71532350	6.40389	DAAM1
14	21974132	22074132	6.39932	LYPLA1，MRPL15，TCEA1
9	14021305	14121305	6.39517	NOT_FOUND
21	6945247	7045247	6.39173	MEF2A
6	78740845	78840845	6.38693	NOT_FOUND
6	36266987	36366987	6.37564	HERC5，HERC6
4	32671872	32771872	6.37317	RUNDC3B
14	21873645	21973645	6.36024	ATP6V1H，RGS20，TCEA1
1	99935805	100035805	6.34251	SERPINI2，WDR49
6	91221316	91321316	6.26307	CCDC158，SHROOM3，STBD1，U6
9	15427058	15527058	6.26122	MYO6
5	103255412	103355412	6.24279	C1RL，RBP5
9	1168706	1268706	6.22195	NOT_FOUND
19	39124032	39224032	6.20833	ARHGAP23，SRCIN1
15	1993773	2093773	6.20321	GRIA4
10	60607267	60707267	6.19287	DTWD1
19	52704233	52804233	6.16167	CBX2，CBX4，CBX8，ENPP7
20	31172771	31272771	6.15894	NNT，PAIP1
3	120357471	120457471	6.15432	HDLBP，PASK，PPP1R7
3	31811994	31911994	6.12675	ATP5PB，C3H1orf162，OVGP1，TMIGD3，WDR77
10	94185071	94285071	6.11635	NOT_FOUND
3	24954257	25054257	6.10331	SPAG17
15	35393251	35493251	6.08916	PIK3C2A，PLEKHA7，RPS13，SNORD14，U6
21	32660624	32760624	6.07331	NOT_FOUND
21	6844402	6944402	6.05286	MEF2A
1	25845722	25945722	6.04467	NOT_FOUND
10	70931189	71031189	6.04145	NOT_FOUND
17	54488126	54588126	6.01447	HVCN1，PPP1CC，TCTN1
13	60778302	60878302	5.98379	DEFB127
5	9748477	9848477	5.98163	OTOGL
15	81342836	81442836	5.97362	OR9Q6
24	32918929	33018929	5.96094	ANKRD29，LAMA3，U6
10	102303883	102403883	5.93407	TTC7B
17	56292850	56392850	5.9319	SRRM4，U6
21	38509612	38609612	5.92928	NOT_FOUND
1	107034855	107134855	5.92722	IFT80，SMC4，TRIM59
6	81760314	81860314	5.8983	NOT_FOUND
21	48190695	48290695	5.87126	NOT_FOUND
10	54593332	54693332	5.86887	PRTG
10	64215628	64315628	5.84135	NOT_FOUND
6	5367759	5467759	5.83977	NOT_FOUND
21	31551333	31651333	5.83045	ISL2
6	96555710	96655710	5.82208	NOT_FOUND
3	54301335	54401335	5.80545	NOT_FOUND
11	64163770	64263770	5.79062	NOT_FOUND
28	34789287	34889287	5.77352	ZMIZ1
27	40545692	40645692	5.75269	NOT_FOUND
16	55895326	55995326	5.74271	NOT_FOUND
5	35277672	35377672	5.74086	DBX2
3	113701432	113801432	5.73524	SPP2
11	55991453	56091453	5.72372	U6
16	8507455	8607455	5.7164	NOT_FOUND
23	2117144	2217144	5.71516	NOT_FOUND
11	56899489	56999489	5.71285	U6
5	35177558	35277558	5.71163	NOT_FOUND
10	71332118	71432118	5.71098	NOT_FOUND
4	35486508	35586508	5.69333	SEMA3D，U6
17	42055589	42155589	5.69141	GLRB
25	32559823	32659823	5.6527	NOT_FOUND
18	4108785	4208785	5.6419	NOT_FOUND
1	12847461	12947461	5.63031	NOT_FOUND
29	33346037	33446037	5.62649	NOT_FOUND
10	71632815	71732815	5.61146	DAAM1，U6
11	50745028	50845028	5.61128	NOT_FOUND
10	80052324	80152324	5.61095	RAD51B
2	3789446	3889446	5.60696	NOT_FOUND
19	294718	394718	5.60399	NOT_FOUND
16	42989693	43089693	5.58768	PEX14
21	30038664	30138664	5.57566	OTUD7A
10	52287990	52387990	5.57533	ALDH1A2，U6
3	26769541	26869541	5.56536	CD58
8	24212752	24312752	5.55413	NOT_FOUND
4	44634072	44734072	5.53169	RELN
19	52000074	52100074	5.48569	ENDOV，NPTX1，RPTOR
5	102754840	102854840	5.47714	WC1
29	36635714	36735714	5.46292	NOT_FOUND
3	32215390	32315390	5.44435	CEPT1，DENND2D，DRAM2
11	89891433	89991433	5.42757	RNF144A
16	47526830	47626830	5.40706	NOT_FOUND
12	11418563	11518563	5.3935	MTRF1，NAA16
6	79847984	79947984	5.38989	TECRL
1	20246471	20346471	5.3735	NOT_FOUND
10	100098774	100198774	5.36965	PTPN21，SPATA7
10	97192038	97292038	5.3682	FLRT2
11	67291447	67391447	5.36665	ANTXR1，GKN1，GKN2
23	15438772	15538772	5.35667	MDFI，TFEB
27	40849497	40949497	5.35258	NOT_FOUND
5	78126675	78226675	5.33223	AMN1
26	30764246	30864246	5.3212	MXI1
11	18257547	18357547	5.3175	NOT_FOUND
4	1811407	1911407	5.295	NOT_FOUND
10	81154878	81254878	5.27641	ERH，PLEKHD1，SLC39A9，U2
10	53691242	53791242	5.25222	NOT_FOUND
20	22366462	22466462	5.23233	MAP3K1
21	35786807	35886807	5.22648	NOT_FOUND
2	45852722	45952722	5.22398	NOT_FOUND
29	6031745	6131745	5.21848	NOX4
6	13419675	13519675	5.20501	NOT_FOUND
11	18156655	18256655	5.19644	NOT_FOUND
12	78384957	78484957	5.19137	NOT_FOUND
21	37803700	37903700	5.18027	NOT_FOUND
1	148529301	148629301	5.17449	DOP1B，MORC3
2	46754078	46854078	5.16922	NOT_FOUND
25	18570700	18670700	5.16873	DCUN1D3，REXO5
2	68486770	68586770	5.16687	NOT_FOUND
22	44407535	44507535	5.16675	CCDC66
12	25052439	25152439	5.16657	CCNA1
22	12508420	12608420	5.15515	CX3CR1，XIRP1
16	71724892	71824892	5.14075	NEK2
14	469971	569971	5.12805	ADCK5，CPSF1，CYHR1，FOXH1，KIFC2，SLC39A4，TONSL，VPS28
14	22778026	22878026	5.11374	XKR4
6	36770232	36870232	5.09304	MEPE
15	35292041	35392041	5.09108	PIK3C2A
29	50392547	50492547	5.08732	AP2A2
7	4876613	4976613	5.0841	CIST1，IQCN，JUND，LSM4
6	95247274	95347274	5.06949	CFAP299
1	58241386	58341386	5.06446	SIDT1，U6
6	19056016	19156016	5.05297	TBCK
10	52688919	52788919	5.04706	CGNL1，MYZAP
21	31753023	31853023	5.04223	SCAPER
8	6881621	6981621	5.03436	GLRA3
10	65819344	65919344	5.01657	NOT_FOUND
19	56627402	56727402	4.99129	NAT9，RAB37，SLC9A3R1，TMEM104，U6
11	56092346	56192346	4.98039	NOT_FOUND
3	14970200	15070200	4.97449	DAP3，GON4L，MSTO1
18	9358572	9458572	4.97177	CDH13
10	96690877	96790877	4.97054	NOT_FOUND
6	103097892	103197892	4.95659	JAKMIP1
12	26455927	26555927	4.95412	NOT_FOUND
1	13547368	13647368	4.92401	NOT_FOUND
8	10187559	10287559	4.92332	FBXO16，FZD3，U6
11	103411068	103511068	4.92092	CAMSAP1，UBAC1
10	54994261	55094261	4.92082	PIGB，RAB27A
9	44244995	44344995	4.91516	NOT_FOUND
9	21050070	21150070	4.91314	NOT_FOUND
6	11607994	11707994	4.91313	ARSJ
6	79244090	79344090	4.91132	NOT_FOUND
11	70520016	70620016	4.90876	ALK
6	89510283	89610283	4.90754	NOT_FOUND
1	91836889	91936889	4.9004	NAALADL2
27	28494783	28594783	4.90018	NRG1
3	35543409	35643409	4.89486	VAV3
19	41638884	41738884	4.88779	KRT15，KRT19，KRT32，KRT35，KRT36
1	53342041	53442041	4.88195	DZIP3
3	15272747	15372747	4.87948	ASH1L，CLK2，FDPS，HCN3，PKLR，RUSC1
1	68340034	68440034	4.87885	ROPN1，U4
12	51117204	51217204	4.87528	NOT_FOUND
25	18771982	18871982	4.86539	DNAH3
1	158427976	158527976	4.84738	NOT_FOUND
21	32458935	32558935	4.84407	HMG20A，PEAK1
12	10416072	10516072	4.84378	NOT_FOUND
2	114756373	114856373	4.82475	NOT_FOUND
5	77525988	77625988	4.8067	BICD1
16	42384742	42484742	4.78681	ANGPTL7，MTOR，UBIAD1
5	108561481	108661481	4.76123	CACNA1C
20	2324517	2424517	4.75624	KCNIP1
27	2165064	2265064	4.74532	CSMD1
16	41578140	41678140	4.73839	MIIP，TNFRSF8
14	31118425	31218425	4.72549	COPS5，CSPP1，PPP1R42，TCF24
1	131231616	131331616	4.72053	NOT_FOUND
13	11906627	12006627	4.71931	CAMK1D
23	42687558	42787558	4.7179	RNF182
16	1752163	1852163	4.6837	NOT_FOUND
21	7046091	7146091	4.66572	NOT_FOUND
28	4897712	4997712	4.659	NOT_FOUND
6	79747335	79847335	4.65049	TECRL
2	135287258	135387258	4.63803	PADI1，PADI3，PADI4
1	44843179	44943179	4.62275	NOT_FOUND
5	34376642	34476642	4.61732	ARID2
29	31053231	31153231	4.59131	NOT_FOUND
21	20760959	20860959	4.58386	FANCI，POLG
15	17276565	17376565	4.58206	U6
2	20815058	20915058	4.57977	EVX2，HOXD13，LNPK
2	52162213	52262213	4.57703	ZEB2
16	49140034	49240034	4.5594	C16H1orf174，CEP104，DFFB
6	94442082	94542082	4.54758	NOT_FOUND
22	20204714	20304714	4.54218	NOT_FOUND
22	43394864	43494864	4.54204	SLMAP
24	3191698	3291698	4.51814	NOT_FOUND
8	84621259	84721259	4.50339	WNK2
5	102654725	102754725	4.5014	WC1.3
9	36312532	36412532	4.50096	HS3ST5
2	61275923	61375923	4.49439	NOT_FOUND
2	116659236	116759236	4.4686	NOT_FOUND
26	38332876	38432876	4.45699	NOT_FOUND
13	6598842	6698842	4.45617	SPTLC3
11	78490547	78590547	4.45195	PUM2
4	77203423	77303423	4.45116	AEBP1，BLVRA，POLM，U6
29	33046975	33146975	4.45099	IGSF9B
1	66140328	66240328	4.44664	GOLGB1，HCLS1
25	19879035	19979035	4.43206	EEF2K，POLR3E
6	88906390	89006390	4.43165	CXCL2
7	73307446	73407446	4.41559	GABRA6
6	60422736	60522736	4.40471	LIMCH1
25	34472005	34572005	4.40029	DTX2，UPK3B，UPK3BL1
12	17433508	17533508	4.39337	NOT_FOUND
20	2830627	2930627	4.38703	RANBP17
12	35578594	35678594	4.38107	LATS2，MRPL57，SAP18，SKA3，ZDHHC20
12	84800899	84900899	4.36093	COL4A1
26	51754581	51854581	4.35602	DPYSL4，JAKMIP3
2	118762400	118862400	4.3556	C2H2orf72，SPATA3
16	26454351	26554351	4.35528	DISP1
23	8777958	8877958	4.34209	SNRPC，U7，UHRF1BP1
15	64339465	64439465	4.33286	CD59，FBXO3
7	78934651	79034651	4.32862	NOT_FOUND
14	59355197	59455197	4.32491	NOT_FOUND
1	88437344	88537344	4.32149	NOT_FOUND
11	56697703	56797703	4.31895	REG3A
14	23179973	23279973	4.29824	LYN，RPS20
14	43277320	43377320	4.29242	TPD52
28	44212733	44312733	4.29228	MARCHF8，ZFAND4
1	158327989	158427989	4.28709	ASMT，KHDRBS1
8	14294937	14394937	4.28675	NOT_FOUND
8	30924808	31024808	4.28622	NOT_FOUND
16	47627655	47727655	4.27218	NOT_FOUND
2	61075622	61175622	4.27137	NOT_FOUND
12	53723680	53823680	4.26601	OBI1，POU4F1
3	54603882	54703882	4.26297	NOT_FOUND
5	57002517	57102517	4.26172	ANKRD52，CNPY2，COQ10A，CS，IL23A，NABP2，PAN2，SLC39A5，STAT2
9	18138153	18238153	4.26014	NOT_FOUND
23	13723108	13823108	4.26013	DAAM2
21	38610457	38710457	4.25083	NOT_FOUND
25	34874569	34974569	4.2314	CUX1
8	33128767	33228767	4.231	NOT_FOUND
21	37702855	37802855	4.22836	U6
3	119046433	119146433	4.22454	OR9S30，OR9S32
9	2474048	2574048	4.22086	NOT_FOUND
20	2020851	2120851	4.21477	U6
8	101651850	101751850	4.21334	HSDL2，PTBP3
10	19311580	19411580	4.20965	ARIH1，TMEM202
7	66273439	66373439	4.20425	U2
22	36609973	36709973	4.20148	NOT_FOUND
10	90075549	90175549	4.19776	NRXN3
9	40128147	40228147	4.19589	GPR6
1	19146618	19246618	4.1952	C1H21orf91
17	35839320	35939320	4.19133	NOT_FOUND
15	22640723	22740723	4.19024	C15H11orf34
13	71193577	71293577	4.1878	PTPRT，U6
8	6981801	7081801	4.18718	GLRA3
15	58469254	58569254	4.18563	NOT_FOUND
16	43695470	43795470	4.17528	CLSTN1，PIK3CD
25	34572646	34672646	4.16762	ALKBH4，LRWD1，ORAI2，POLR2J，PRKRIP1，U6
13	49962439	50062439	4.16492	NOT_FOUND
14	58450817	58550817	4.16369	NOT_FOUND
10	99296916	99396916	4.16369	NOT_FOUND
2	106443869	106543869	4.16268	CNOT9，USP37，VIL1
16	61440715	61540715	4.15982	ACBD6，LHX4
4	67251677	67351677	4.15509	CREB5
24	26290560	26390560	4.15421	NOT_FOUND
15	16871722	16971722	4.134	ALKBH8
12	69462788	69562788	4.13384	NOT_FOUND
5	57102632	57202632	4.13269	ESYT1，MYL6，MYL6B，NABP2，RNF41，SMARCC2，ZC3H10
1	55041814	55141814	4.13126	NOT_FOUND
15	66869729	66969729	4.12777	PRR5L，TRAF6
11	64365556	64465556	4.12259	NOT_FOUND
7	71800159	71900159	4.11782	CCNJL，FABP6
3	27778031	27878031	4.11128	NOT_FOUND
6	79042792	79142792	4.10778	NOT_FOUND
21	35685963	35785963	4.10678	NOT_FOUND
10	79150233	79250233	4.10082	ATP6V1D，PALS1
12	85302145	85402145	4.09774	ANKRD10
29	5932058	6032058	4.09644	FOLH1B
7	107975048	108075048	4.09554	FER
19	50289975	50389975	4.09464	SECTM1，SECTM1A
6	101789456	101889456	4.08095	AFF1，U6
20	48178058	48278058	4.07852	NOT_FOUND
8	105759227	105859227	4.0768	ASTN2
4	80219104	80319104	4.07646	SUGCT
18	33689312	33789312	4.07382	NOT_FOUND
18	48328140	48428140	4.07167	ACTN4，EIF3K，MAP4K1，RYR1
13	79105180	79205180	4.06124	NOT_FOUND
18	24300271	24400271	4.06081	GNAO1
6	93938837	94038837	4.05971	NAA11
4	74589833	74689833	4.04812	NOT_FOUND
6	81860963	81960963	4.04579	NOT_FOUND
7	97825982	97925982	4.04112	NOT_FOUND
29	449262	549262	4.03895	NOT_FOUND
29	50492234	50592234	4.0386	CD151，CEND1，CHID1，CRACR2B，GATD1，PIDD1，PNPLA2，POLR2L，RPLP2，SLC25A22，SNORA52，TALDO1，TSPAN4
11	67190554	67290554	4.03729	BMP10，GKN2
15	24361302	24461302	4.03454	HTR3B，USP28
9	3578569	3678569	4.03288	NOT_FOUND
5	103355527	103455527	4.03255	C1R，C1S，LPCAT3
17	36741682	36841682	4.02819	FSTL5
1	37044223	37144223	4.02275	EPHA3
8	107061567	107161567	4.0195	TLR4
12	69563037	69663037	4.01751	NOT_FOUND
29	48797552	48897552	4.01597	KCNQ1
4	102334095	102434095	4.00556	ATP6V0A4，SVOPL，Y_RNA
2	127375356	127475356	4.00468	MAN1C1
5	62508814	62608814	4.00042	NOT_FOUND
16	41074013	41174013	3.99311	AADACL4，DHRS3
18	51760692	51860692	3.98943	CADM4，IRGQ，PINLYP，SRRM5，XRCC1，ZNF428，ZNF576
9	12615552	12715552	3.98634	KCNQ5
17	37242994	37342994	3.98182	NOT_FOUND
7	29395149	29495149	3.98087	NOT_FOUND
2	120965714	121065714	3.97386	RBBP4，SYNC，ZBTB8A，ZBTB8OS
6	78539547	78639547	3.96207	NOT_FOUND
21	42745086	42845086	3.95857	AKAP6，U6
4	65743837	65843837	3.9571	GARS1，GGCT，NOD1
29	7925802	8025802	3.95279	NOT_FOUND
24	54310484	54410484	3.95092	CCDC68
1	146129622	146229622	3.9476	DIP2A
8	84320719	84420719	3.9462	FGD3
26	47011572	47111572	3.92069	NPS
18	1887722	1987722	3.90908	GLG1，PDPR
5	70017401	70117401	3.90773	RFX4，RIC8B
11	101998569	102098569	3.90565	MED27
2	134786505	134886505	3.90531	ACTL8
1	91636916	91736916	3.90125	NAALADL2
2	124671288	124771288	3.89945	GMEB1，OPRD1，U6，YTHDF2
15	779247	879247	3.89924	NOT_FOUND
10	95187393	95287393	3.87973	NOT_FOUND
14	33932053	34032053	3.87624	NCOA2
12	11719310	11819310	3.87313	VWA8
1	61940890	62040890	3.87002	NOT_FOUND
18	24098356	24198356	3.86991	BBS2，NUDT21，OGFOD1，U6
3	27677182	27777182	3.85955	VANGL1
2	127675808	127775808	3.85344	RSRP1，SYF2，TMEM50A
14	1876785	1976785	3.85291	TSNARE1
24	33119789	33219789	3.85163	RIOK3，RMC1，TMEM241
1	48642670	48742670	3.84894	NOT_FOUND
21	36391875	36491875	3.84736	NOT_FOUND
4	102434618	102534618	3.8449	ATP6V0A4，KIAA1549，TMEM213
19	51295916	51395916	3.84429	BAHCC1
9	96257857	96357857	3.8405	IGF2R，SLC22A1
11	36317358	36417358	3.83438	ASB3
1	133031375	133131375	3.83301	MSL2，PPP2R3A
27	35077212	35177212	3.83279	IDO2
8	4878022	4978022	3.82892	NOT_FOUND
20	29856886	29956886	3.81573	NOT_FOUND
3	28685673	28785673	3.81224	BCAS2，DENND2C
13	71494017	71594017	3.80882	PTPRT
8	13994397	14094397	3.80455	NOT_FOUND
17	40651915	40751915	3.80221	TMEM144
26	36617320	36717320	3.80193	GFRA1
8	113072363	113172363	3.7965	NOT_FOUND
1	2648826	2748826	3.79512	NOT_FOUND
19	45662647	45762647	3.79406	U6
6	94643380	94743380	3.78363	ANTXR2
24	56419511	56519511	3.78348	NOT_FOUND
6	84075240	84175240	3.77374	YTHDC1
9	60812798	60912798	3.77152	GABRR1，U6，UBE2J1
26	24911172	25011172	3.77148	CFAP58
16	7801678	7901678	3.76889	NOT_FOUND
4	50162820	50262820	3.76783	NOT_FOUND
8	43647661	43747661	3.76036	DMRT1
5	25266223	25366223	3.75409	NOT_FOUND
9	16330757	16430757	3.75405	NOT_FOUND
11	15432549	15532549	3.75292	LTBP1，U6
9	36212121	36312121	3.75239	HS3ST5
11	65374484	65474484	3.75178	NOT_FOUND
3	75883034	75983034	3.75042	NOT_FOUND
9	15627880	15727880	3.74445	IMPG1
9	18238564	18338564	3.74261	NOT_FOUND
12	19839486	19939486	3.7418	NOT_FOUND
21	31450489	31550489	3.73978	ETFA，TMEM266
1	44943165	45043165	3.73015	TMEM45A
2	121666769	121766769	3.7295	NOT_FOUND
24	55113923	55213923	3.72101	NOT_FOUND
8	111068764	111168764	3.71849	EIPR1，TRAPPC12
10	17206703	17306703	3.71416	NOT_FOUND
10	34546882	34646882	3.70873	NOT_FOUND
1	53741988	53841988	3.70483	NOT_FOUND
2	132282738	132382738	3.70115	VWA5B1
17	40351128	40451128	3.70027	RXFP1
7	22662600	22762600	3.69896	FNIP1
9	22656645	22756645	3.69105	U2
15	10191827	10291827	3.68865	NOT_FOUND
4	87959351	88059351	3.66981	LMOD2，WASL
26	20369994	20469994	3.66862	CNNM1，GOT1
4	41517869	41617869	3.66773	NOT_FOUND
1	53941961	54041961	3.66709	U6
9	20849248	20949248	3.6629	NOT_FOUND
16	49240859	49340859	3.65368	CCDC27，CEP104，LRRC47，SMIM1，TP73
20	13560153	13660153	3.65028	ERBIN
26	36819150	36919150	3.64734	PNLIPRP3
21	16525485	16625485	3.64501	AKAP13，KLHL25
14	25390681	25490681	3.64186	NOT_FOUND
17	33633547	33733547	3.64161	NOT_FOUND
16	53979646	54079646	3.63738	PDPN
7	88279831	88379831	3.63483	MEF2C
19	46869776	46969776	3.63324	METTL2A，TLK2
28	24048585	24148585	3.62913	CTNNA3
22	60103925	60203925	3.62486	NOT_FOUND
5	39682710	39782710	3.62085	CNTN1
23	28154872	28254872	3.6186	DDR1，GTF2H4，VARS2
14	23280460	23380460	3.61649	CHCHD7，MOS，PLAG1，U1
18	61553563	61653563	3.61162	CACNG7，CACNG8，MYADM，PRKCG
26	40048432	40148432	3.60722	NOT_FOUND
5	102955069	103055069	3.60522	CD163L1
26	35507254	35607254	3.59344	ATRNL1
1	108034721	108134721	3.58961	NOT_FOUND
2	95427297	95527297	3.58674	KLF7
3	40686711	40786711	3.58513	NOT_FOUND
6	54283150	54383150	3.58381	NOT_FOUND
25	3071959	3171959	3.58309	CREBBP
6	95951816	96051816	3.58187	PRKG2
8	68191748	68291748	3.58173	NOT_FOUND
19	22928386	23028386	3.57948	RPA1，RTN4RL1
6	12916430	13016430	3.57455	LARP7，ZGRF1
27	26469420	26569420	3.5727	RBPMS
9	35107600	35207600	3.57146	NOT_FOUND
10	12495787	12595787	3.56281	DENND4A，INTS14，SLC24A1
25	17765570	17865570	3.55788	NOT_FOUND
18	21574421	21674421	3.55476	CHD9
13	74498424	74598424	3.55187	DNTTIP1，TNNC2，U5，UBE2C，WFDC3
25	656571	756571	3.54109	CHTF18，GNG13，LMF1，RPUSD1
2	68987524	69087524	3.536	NOT_FOUND
15	35595672	35695672	3.53549	C15H11orf58，PLEKHA7
3	23744069	23844069	3.52688	HAO2
11	50240564	50340564	3.52125	DNAH6
16	50249112	50349112	3.52099	HES5，MMEL1，PANK4，PRXL2B
20	13458931	13558931	3.51708	ERBIN，SREK1
18	878148	978148	3.51548	NOT_FOUND
10	44770572	44870572	3.51306	GNG2，NID2，RTRAF
22	23343992	23443992	3.51289	CNTN4
6	91825209	91925209	3.51252	CCNI，SEPTIN11
8	64284730	64384730	3.50782	NOT_FOUND
11	8975410	9075410	3.50502	POU3F3
1	129331870	129431870	3.5042	NOT_FOUND
7	103855130	103955130	3.50122	U6
21	32156401	32256401	3.49587	PEAK1，PSTPIP1，TSPAN3
28	37626454	37726454	3.48709	NRG3
8	10387919	10487919	3.48504	PNOC
22	60205192	60305192	3.48347	CHCHD6，PLXNA1
1	52842108	52942108	3.48082	IFT57
10	50684274	50784274	3.47747	NOT_FOUND
8	81014781	81114781	3.47734	FBP1，FBP2
29	12212351	12312351	3.47732	DLG2
20	28541001	28641001	3.47664	SNORD28
26	42066734	42166734	3.47163	BTBD16，TACC2
13	12106920	12206920	3.46933	CDC123，NUDT5
3	118945584	119045584	3.46775	OR9S29，OR9S3，OR9S33，OR9S41
3	91716337	91816337	3.4633	ACOT11
18	26824207	26924207	3.46276	NOT_FOUND
1	138130693	138230693	3.46227	CPNE4
11	55285204	55385204	3.46147	CTNNA2
4	11662631	11762631	3.46076	NOT_FOUND
21	19248290	19348290	3.4577	NTRK3
2	20214154	20314154	3.45721	U6
25	18671341	18771341	3.44599	DCUN1D3，DNAH3，LYRM1
20	13762597	13862597	3.44323	NLN，SGTB
19	37615121	37715121	3.44009	ATP5MC1，CALCOCO2
15	27195197	27295197	3.42941	NOT_FOUND
12	78585455	78685455	3.42813	NOT_FOUND
7	108075534	108175534	3.42572	FER
10	99697845	99797845	3.4229	GALC，GPR65
18	62765052	62865052	3.41728	TTYH1
2	103639651	103739651	3.416	NOT_FOUND
9	55390608	55490608	3.41327	NOT_FOUND
16	65372901	65472901	3.41291	C16H1orf21
8	107863006	107963006	3.41119	NOT_FOUND
1	15747073	15847073	3.41001	NOT_FOUND
8	30824628	30924628	3.40101	NOT_FOUND
12	36480836	36580836	3.39863	CENPJ，RNF17
26	590640	690640	3.39714	UBE2D1
28	26176460	26276460	3.39633	COL13A1
23	25934601	26034601	3.39317	NOT_FOUND
24	35027956	35127956	3.3918	ROCK1
2	40244285	40344285	3.39112	NOT_FOUND
2	132382889	132482889	3.38818	PLA2G2C，UBXN10
16	57911831	58011831	3.38537	PAPPA2
7	89184203	89284203	3.3811	NOT_FOUND
5	97548886	97648886	3.37966	LRP6
17	59501246	59601246	3.3769	NOT_FOUND
16	8809931	8909931	3.37525	NOT_FOUND
3	27576333	27676333	3.37399	CASQ2，VANGL1
9	1670761	1770761	3.36982	NOT_FOUND
15	35190830	35290830	3.36005	NOT_FOUND
10	50383578	50483578	3.35673	NOT_FOUND
7	16633452	16733452	3.35333	ELAVL1，EVI5L，LRRC8E，MAP2K7，SNAPC2，TIMM44
11	82223581	82323581	3.34709	NOT_FOUND
5	63209616	63309616	3.3411	NOT_FOUND
22	57774783	57874783	3.33629	SLC6A6
26	34094443	34194443	3.33425	CASP7，NRAP
9	42035955	42135955	3.33348	OSTM1
12	35979591	36079591	3.33339	CRYL1，GJB6
16	48635908	48735908	3.33338	AJAP1
29	5533309	5633309	3.33336	U6
8	78610462	78710462	3.33264	NOT_FOUND
25	857853	957853	3.32986	C1QTNF8，CACNA1H，SSTR5，TEKT4
11	70318231	70418231	3.32913	ALK
23	45008751	45108751	3.32408	NEDD9
19	38922844	39022844	3.32324	GPR179，MRPL45，NPEPPS，SOCS7
18	23997399	24097399	3.32106	MT1A，MT1E，MT2A，MT3，MT4
5	45889808	45989808	3.32081	NOT_FOUND
16	43594645	43694645	3.31216	CTNNBIP1，LZIC，NMNAT1
12	25754183	25854183	3.30961	NBEA
15	66970939	67070939	3.30909	IFTAP，RAG1，RAG2，U6
29	6729556	6829556	3.30772	NOT_FOUND
26	31672482	31772482	3.30503	NOT_FOUND
7	28591263	28691263	3.3038	NOT_FOUND
8	40642263	40742263	3.30196	NOT_FOUND
3	30803503	30903503	3.29954	CTTNBP2NL，ST7L，WNT2B
20	37246088	37346088	3.29276	NIPBL
9	37919106	38019106	3.29053	NOT_FOUND
5	56201601	56301601	3.28094	LRP1，NDUFA4L2，NXPH4，SHMT2
9	39525681	39625681	3.28049	CDK19
25	32861746	32961746	3.27881	GTF2I，GTF2IRD1
7	60043320	60143320	3.27805	HTR4
13	41449955	41549955	3.27786	FOXA2
3	53191995	53291995	3.27639	ZNF326
5	107860679	107960679	3.27486	ERC1
1	95636380	95736380	3.27401	TMEM212
1	24345922	24445922	3.27311	NOT_FOUND
16	71624067	71724067	3.26993	LPGAT1
5	75323469	75423469	3.26825	CSF2RB，TEX33
9	34906779	35006779	3.26604	NOT_FOUND
16	67591056	67691056	3.26247	NOT_FOUND
4	68256904	68356904	3.25936	JAZF1，TAX1BP1
3	27374635	27474635	3.25821	NOT_FOUND
3	44115579	44215579	3.25216	U6
5	3241035	3341035	3.25031	NOT_FOUND
2	116058332	116158332	3.24915	SPHKAP
22	13318556	13418556	3.24792	ZNF621
1	40743727	40843727	3.24733	NOT_FOUND
18	48429097	48529097	3.24551	ACTN4，CAPN12
9	38019517	38119517	3.23345	NOT_FOUND
9	39023627	39123627	3.2331	REV3L
1	16247006	16347006	3.22884	NOT_FOUND
5	70317745	70417745	3.22764	CRY1
29	9720171	9820171	3.21833	SYTL2
17	67221451	67321451	3.21428	MN1，PITPNB
22	53319033	53419033	3.20861	CCR9，CXCR6，FYCO1，XCR1
11	46406638	46506638	3.20856	CKAP2L，IL1A
12	9413581	9513581	3.20273	NOT_FOUND
1	132331469	132431469	3.2017	SLC35G2
29	50292860	50392860	3.20163	NOT_FOUND
10	50784507	50884507	3.19763	FAM81A
18	18545698	18645698	3.1948	TENT4B
15	22438302	22538302	3.19238	BCO2，IL18，TEX12
10	45071268	45171268	3.1915	PTGDR
29	648637	748637	3.19111	HEPHL1，PANX1
12	37082331	37182331	3.18999	NOT_FOUND
9	3377747	3477747	3.1895	NOT_FOUND
1	80738374	80838374	3.18828	NOT_FOUND
27	25051666	25151666	3.18621	ERI1
19	8141056	8241056	3.18305	MSI2
22	31344088	31444088	3.18025	MDFIC2
18	35809418	35909418	3.17874	ZFP90
8	70796426	70896426	3.17871	NKX2-6
13	39947752	40047752	3.17666	RALGAPA2
28	34890615	34990615	3.17649	PPIF，ZCCHC24，ZMIZ1
18	33588355	33688355	3.17614	NOT_FOUND
14	22476566	22576566	3.17273	NOT_FOUND
17	17290777	17390777	3.16974	CLGN，SCOC
17	41754802	41854802	3.16908	GRIA2
6	93838188	93938188	3.16144	NOT_FOUND
12	84700650	84800650	3.15288	NOT_FOUND
1	70339766	70439766	3.14933	FYTTD1，RUBCN
2	18611743	18711743	3.14832	OSBPL6
12	72971506	73071506	3.14726	CLDN10，DZIP1
6	102393349	102493349	3.14683	SPARCL1
18	64582286	64682286	3.14644	ZNF548
16	13952019	14052019	3.14494	NOT_FOUND
20	30464218	30564218	3.14417	FGF10
22	13217289	13317289	3.14173	ENTPD3，RPL14，ZNF619
18	60644946	60744946	3.14024	ZNF331
2	36538711	36638711	3.13783	CD302，LY75，MARCHF7
7	78834165	78934165	3.13757	NOT_FOUND
2	68386620	68486620	3.13741	NOT_FOUND
7	17537824	17637824	3.13641	ADGRE1
27	15836264	15936264	3.13384	SORBS2
1	140830331	140930331	3.13375	NOT_FOUND
6	78640196	78740196	3.13321	NOT_FOUND
15	48955463	49055463	3.12876	OR52E1B，OR52E2，OR52E3，OR52S2
10	15402522	15502522	3.12505	CORO2B
8	110367505	110467505	3.11918	C5
3	14869351	14969351	3.11847	GON4L，SYT11
22	25875668	25975668	3.11351	NOT_FOUND
20	20240801	20340801	3.11017	PDE4D
21	32559780	32659780	3.10348	HMG20A
3	54402184	54502184	3.10099	GBP2，GBP4，U2
22	20305981	20405981	3.09985	NOT_FOUND
1	96736233	96836233	3.09711	NOT_FOUND
4	33275009	33375009	3.09342	DMTF1
21	41736640	41836640	3.09219	HEATR5A，HECTD1
11	88579827	88679827	3.0916	ID2，KIDINS220
24	36032254	36132254	3.0822	NOT_FOUND
20	56579480	56679480	3.07991	RETREG1
9	31693629	31793629	3.0783	MAN1A1
22	2685518	2785518	3.07624	AZI2，CMC1
1	23646016	23746016	3.07032	NOT_FOUND
20	25099455	25199455	3.06893	NOT_FOUND
2	124470987	124570987	3.06857	EPB41
2	58371554	58471554	3.06767	NXPH2
1	41043687	41143687	3.06732	NOT_FOUND
14	76035995	76135995	3.06631	CNGB3，CPNE3
20	22062796	22162796	3.06583	GPBP1
14	7102095	7202095	3.06582	ZFAT
28	29418936	29518936	3.06369	PPP3CB，USP54
29	36735401	36835401	3.06264	NOT_FOUND
19	13170760	13270760	3.06216	NOT_FOUND
19	39023438	39123438	3.06176	ARHGAP23，SOCS7
29	35638842	35738842	3.05384	NOT_FOUND
8	40141363	40241363	3.05221	NOT_FOUND
1	137630760	137730760	3.05109	NOT_FOUND
20	1008632	1108632	3.05109	SLIT3
10	95788787	95888787	3.05023	Y_RNA
20	28642223	28742223	3.04988	EMB
15	5536142	5636142	3.04863	NOT_FOUND
10	54793797	54893797	3.04727	DNAAF4，PYGO1
15	72942361	73042361	3.04635	NOT_FOUND
20	20342023	20442023	3.04475	RAB3C
12	12621552	12721552	3.04101	TNFSF11
10	54693564	54793564	3.04025	PRTG
1	15447113	15547113	3.03937	NCAM2
24	31312052	31412052	3.03622	ZNF521
6	98669338	98769338	3.03375	NOT_FOUND
3	52586901	52686901	3.03316	NOT_FOUND
28	6924259	7024259	3.03188	SLC35F3
17	52783666	52883666	3.02564	HCAR1，KNTC1
15	27093987	27193987	3.02331	NOT_FOUND
12	62244853	62344853	3.02277	SLITRK5
2	1385831	1485831	3.02214	AMER3
6	84880432	84980432	3.01433	NOT_FOUND
5	92142704	92242704	3.01312	NOT_FOUND
4	14175698	14275698	3.01203	NOT_FOUND
8	108864806	108964806	3.01125	NOT_FOUND
8	21808433	21908433	3.00944	NOT_FOUND
12	85001397	85101397	3.0079	COL4A2
1	54941827	55041827	3.00472	NOT_FOUND
9	31794040	31894040	3.00367	MAN1A1
22	14635028	14735028	3.00362	SEC22C，SS18L2，VIPR1
3	80421242	80521242	3.00341	JAK1
11	27842363	27942363	3.00185	SRBD1
14	63776614	63876614	2.99771	ANKRD46，SNX31
2	7595171	7695171	2.99727	NOT_FOUND
6	18955367	19055367	2.99495	TBCK
17	6963749	7063749	2.9946	LRBA
18	63269839	63369839	2.9926	NDUFA3，OSCAR，PRPF31，TARM1，TFPT
5	54199311	54299311	2.99061	NOT_FOUND
10	53290313	53390313	2.98808	U6
5	102454497	102554497	2.98555	NOT_FOUND
24	24583253	24683253	2.98475	NOT_FOUND
29	36536027	36636027	2.98446	ADAMTS15
23	50155744	50255744	2.97812	PXDC1
2	83872	183872	2.97642	NOT_FOUND
10	46374288	46474288	2.97432	FBXL22，USP3
3	40283315	40383315	2.97333	COL11A1
13	42150983	42250983	2.97057	CST3
18	24199314	24299314	2.96912	AMFR，GNAO1，NUDT21
12	44901760	45001760	2.96903	NOT_FOUND
16	46316927	46416927	2.96592	NOT_FOUND
21	995414	1095414	2.96522	NOT_FOUND
5	103555756	103655756	2.9649	CD4，CDCA3，GNB3，GPR162，P3H3，SPSB2，TPI1，USP5
15	52599043	52699043	2.9642	FCHSD2
27	24140252	24240252	2.96168	NOT_FOUND
22	19394578	19494578	2.96084	GRM7
20	28034891	28134891	2.95819	NOT_FOUND
10	101502025	101602025	2.9565	EFCAB11
10	102203651	102303651	2.95608	TTC7B
4	1509839	1609839	2.95607	NOT_FOUND
13	63482267	63582267	2.95579	EIF2S2
10	78147911	78247911	2.95527	NOT_FOUND
16	48434257	48534257	2.94994	NOT_FOUND
3	31610296	31710296	2.94418	RAP1A
2	135387409	135487409	2.94033	PADI1，PADI2
19	15786206	15886206	2.93576	CCL1，CCL11，CCL8
6	95750518	95850518	2.93469	BMP3
16	52265617	52365617	2.93466	TMEM51
19	12969572	13069572	2.93279	NOT_FOUND
16	55996152	56096152	2.93022	NOT_FOUND
5	108461366	108561366	2.92925	CACNA1C
26	12902279	13002279	2.9292	NOT_FOUND
26	38231961	38331961	2.92889	RAB11FIP2
1	136330934	136430934	2.92748	NOT_FOUND
2	58872307	58972307	2.92632	NOT_FOUND
19	53710174	53810174	2.92496	DNAH17，PGS1
9	61314853	61414853	2.92451	RNGTT
11	72537872	72637872	2.91752	AGBL5，EMILIN1，KHK，MAPRE3，SNORA62，TMEM214
17	67321713	67421713	2.91518	PITPNB，TTC28
8	104857608	104957608	2.91452	NOT_FOUND
16	42888868	42988868	2.9137	CASZ1，PEX14
5	36479046	36579046	2.91291	TMEM117
11	73546800	73646800	2.91111	ASXL2
2	12803005	12903005	2.91106	NOT_FOUND
14	16447362	16547362	2.91075	ATAD2，ZHX1
3	102507187	102607187	2.90909	HYI，SZT2
3	11541332	11641332	2.90883	CD1B5，CD1E，OR10T1，OR10T2
5	37371	137371	2.90429	NOT_FOUND
15	35696883	35796883	2.90227	C15H11orf58
9	61716497	61816497	2.90224	CNR1
17	16989989	17089989	2.90196	TBC1D9
8	68091568	68191568	2.89963	NOT_FOUND
8	86825218	86925218	2.89915	NOT_FOUND
14	44784621	44884621	2.89725	CCN3
5	78727362	78827362	2.89622	CAPRIN2
9	95956624	96056624	2.89621	ACAT2，MRPL18，SNORA20，SNORA29，SOD2，TCP1，WTAP
22	30432684	30532684	2.89556	FOXP1
11	41462891	41562891	2.89381	NOT_FOUND
11	99072678	99172678	2.89275	DYNC2I2，GLE1，SPTAN1
11	50845921	50945921	2.89229	NOT_FOUND
19	43650766	43750766	2.89199	CD300LG，CFAP97D1，DUSP3，MPP3
13	17715145	17815145	2.88993	ACBD5，MASTL，YME1L1
8	63383110	63483110	2.88476	GABBR2
5	74122095	74222095	2.88117	RBFOX2
14	35238381	35338381	2.87947	NOT_FOUND
22	2280450	2380450	2.87815	NOT_FOUND
4	64235996	64335996	2.87776	NOT_FOUND
15	52396622	52496622	2.87641	FCHSD2
10	100199006	100299006	2.87627	PTPN21，ZC3H14
4	81827467	81927467	2.8759	NOT_FOUND
6	6273599	6373599	2.87185	SYNPO2
5	82531713	82631713	2.87087	ARNTL2，STK38L
9	55290197	55390197	2.8698	NOT_FOUND
9	64327181	64427181	2.86809	NOT_FOUND
22	38837848	38937848	2.86633	CADPS，FEZF2
12	82294672	82394672	2.86384	ARGLU1
6	6978142	7078142	2.86377	NDST3
8	43747841	43847841	2.86351	KANK1
24	42761053	42861053	2.86253	AFG3L2，CIDEA，IMPA2，PRELID3A，TUBB6
2	106043266	106143266	2.86239	TNS1
10	54392868	54492868	2.86184	NEDD4
8	111168944	111268944	2.86007	NOT_FOUND
20	62349130	62449130	2.85986	NOT_FOUND
3	31912843	32012843	2.85884	NOT_FOUND
6	33247519	33347519	2.85846	NOT_FOUND
9	16531578	16631578	2.85797	NOT_FOUND
15	35494462	35594462	2.85345	PLEKHA7
17	63411480	63511480	2.84847	FAM222A，TRPV4
1	48542684	48642684	2.84145	U7
3	44216428	44316428	2.84051	PLPPR5
4	75293492	75393492	2.83927	NOT_FOUND
8	33028587	33128587	2.83659	U6
1	92136849	92236849	2.83337	NAALADL2
29	15202967	15302967	2.8309	NOT_FOUND
17	41454015	41554015	2.83074	NOT_FOUND
19	37212745	37312745	2.83062	ZNF652
11	93120003	93220003	2.82881	MRRF，RBM18
8	45050180	45150180	2.82852	PIP5K1B
19	18502246	18602246	2.82743	RAB11FIP4
19	28159278	28259278	2.82675	CCDC42，MYH10，U6
26	2810772	2910772	2.82625	ZWINT
12	3799631	3899631	2.82252	NOT_FOUND
13	68890199	68990199	2.82206	NOT_FOUND
22	9369142	9469142	2.82061	NOT_FOUND
6	74010345	74110345	2.82057	NOT_FOUND
6	54182501	54282501	2.8193	NOT_FOUND
6	94039486	94139486	2.81763	GK2
19	28259872	28359872	2.81698	CCDC42，MFSD6L，PIK3R5，PIK3R6
14	65183428	65283428	2.81664	VPS13B
11	47920030	48020030	2.81301	FABP1，KRCC1，SMYD1
8	105057968	105157968	2.81184	NOT_FOUND
10	52087526	52187526	2.80456	AQP9
20	24795789	24895789	2.80455	NOT_FOUND
13	37744520	37844520	2.80213	PCSK2
10	46274055	46374055	2.79777	NOT_FOUND
17	54588389	54688389	2.7956	CCDC63，U6
22	1166512	1266512	2.79549	U1
7	107673591	107773591	2.79535	NOT_FOUND
23	45715201	45815201	2.79343	NOT_FOUND
5	99451062	99551062	2.79128	NKG2A
3	99179167	99279167	2.78755	CYP4A11
1	47542817	47642817	2.7875	NOT_FOUND
27	40950765	41050765	2.78676	NOT_FOUND
1	131431589	131531589	2.78602	NOT_FOUND
28	18678235	18778235	2.78593	NOT_FOUND
23	26035522	26135522	2.78039	NOT_FOUND
6	26202092	26302092	2.78009	RAP1GDS1
9	53683622	53783622	2.7791	NOT_FOUND
10	90175781	90275781	2.77886	NOT_FOUND
3	110272564	110372564	2.77744	KIAA0319L，ZMYM4
5	40683855	40783855	2.77252	NOT_FOUND
9	23660754	23760754	2.7723	C9H6orf58
25	22193782	22293782	2.77147	RBBP6
3	36955296	37055296	2.77099	NOT_FOUND
4	45739822	45839822	2.7691	LHFPL3
16	35831100	35931100	2.76816	RGS7
8	72699845	72799845	2.7678	DOCK5，GNRH1，KCTD9
3	25055107	25155107	2.76397	SPAG17
11	105832495	105932495	2.76134	AJM1，CCDC183，LCN10，LCN15，LCN8，RABL6，TMEM141
7	83657484	83757484	2.75706	NOT_FOUND
12	71768517	71868517	2.75676	NOT_FOUND
10	18309258	18409258	2.75578	THSD4
16	1248037	1348037	2.7548	OPTC，PRELP，U6
4	29053056	29153056	2.75074	ITGB8
14	23079486	23179486	2.75021	LYN，TGS1
9	35710066	35810066	2.74636	NOT_FOUND
16	77572757	77672757	2.74606	PTPRC，U6
12	45904251	46004251	2.74531	NOT_FOUND
5	11350309	11450309	2.74529	NOT_FOUND
14	14136167	14236167	2.74226	NOT_FOUND
17	50978942	51078942	2.74199	SCARB1
8	19504294	19604294	2.7381	NOT_FOUND
1	61840904	61940904	2.73698	NOT_FOUND
10	37654082	37754082	2.73693	CAPN3，GANC
1	55141800	55241800	2.7363	U6
10	52187758	52287758	2.73415	ALDH1A2
15	66768518	66868518	2.73143	PRR5L
17	54788914	54888914	2.73017	CUX2
8	8083781	8183781	2.73007	Metazoa_SRP，XKR6
19	24236109	24336109	2.72661	SHPK，TRPV1，TRPV3
4	68457949	68557949	2.72639	HIBADH
28	26277788	26377788	2.72395	AIFM2，MACROH2A2，TYSND1
19	39928785	40028785	2.71669	CDK12，NEUROD2，PPP1R1B，STARD3
4	303567	403567	2.71642	NOT_FOUND
3	42300296	42400296	2.71575	SLC30A7，U6
7	99634727	99734727	2.71169	NOT_FOUND
4	58707248	58807248	2.70898	NOT_FOUND
10	63413770	63513770	2.70626	NOT_FOUND
16	47325179	47425179	2.70469	NPHP4
8	101551670	101651670	2.70367	PTBP3，SUSD1，U6
4	64537564	64637564	2.70194	PDE1C
5	8146645	8246645	2.70098	NOT_FOUND
21	10979031	11079031	2.69962	NOT_FOUND
26	23801106	23901106	2.69772	INA，NT5C2
19	44656707	44756707	2.69691	C1QL1，DCAKD，NMT1
18	58322925	58422925	2.69483	NOT_FOUND
16	59827511	59927511	2.6948	RASAL2，TEX35
16	42082266	42182266	2.694	DISP3
18	62260265	62360265	2.69329	EPS8L1，PPP1R12C，RDH13，TNNI3，TNNT1
15	59987412	60087412	2.69236	NOT_FOUND
18	61452605	61552605	2.69221	NOT_FOUND
21	33870760	33970760	2.69215	CSK，CYP1A1，CYP1A2
29	40623202	40723202	2.69048	INCENP，SCGB1D，SCGB2A2
3	80622940	80722940	2.69033	RAVER2
5	118673044	118773044	2.68671	NOT_FOUND
2	73294002	73394002	2.68655	CLASP1，NIFK
28	19488854	19588854	2.68347	JMJD1C，MIR1296
12	69362539	69462539	2.68322	NOT_FOUND
4	4123429	4223429	2.67976	NOT_FOUND
4	55993136	56093136	2.67585	ZNF277
10	44570107	44670107	2.67227	GNG2
11	91001254	91101254	2.67088	NOT_FOUND
8	97744832	97844832	2.67014	NOT_FOUND
4	22116990	22216990	2.66981	ETV1
4	107360229	107460229	2.66679	NOT_FOUND
5	98049459	98149459	2.66509	ETV6
21	894570	994570	2.66473	NOT_FOUND
3	18298219	18398219	2.66279	NOT_FOUND
1	88537331	88637331	2.66239	NOT_FOUND
20	28844667	28944667	2.66146	NOT_FOUND
2	106844472	106944472	2.66133	CDK5R2，CRYBA2，FEV，WNT10A
25	2770036	2870036	2.66095	NAA60，OR2C1，ZNF174，ZNF597
24	39446869	39546869	2.66053	NOT_FOUND
28	44516715	44616715	2.66043	DEPP1，RASSF4，ZNF22
12	58736135	58836135	2.65939	SLITRK1
4	66045405	66145405	2.65915	ZNRF2
7	60143805	60243805	2.65791	ADRB2
17	55691275	55791275	2.65539	CIT，PRKAB1
25	29138023	29238023	2.65487	GALNT17
7	18442196	18542196	2.65466	CAPS，DUS3L，FUT6，NDUFA11，NRTN，RANBP3，VMAC
23	6557687	6657687	2.65281	LRRC1
3	24349163	24449163	2.6525	U6
6	72399961	72499961	2.64841	IGFBP7，POLR2B
6	24390411	24490411	2.64717	NOT_FOUND
2	3088392	3188392	2.64406	NOT_FOUND
24	41756755	41856755	2.64387	RAB31
19	39526409	39626409	2.64315	FBXO47，PLXDC1
7	23667458	23767458	2.64261	NOT_FOUND
12	18135252	18235252	2.64172	LPAR6，RB1
6	92630401	92730401	2.64138	MRPL1
21	38005389	38105389	2.64054	NOT_FOUND
11	28649506	28749506	2.64053	EPAS1
21	45972114	46072114	2.63787	BRMS1L，RALGAPA1，U6
21	40425660	40525660	2.63672	PRKD1
11	3022735	3122735	2.63569	TMEM131，ZAP70
14	20466831	20566831	2.63189	SNTG1
14	771431	871431	2.63149	GRINA，OPLAH，PARP10，PLEC，SPATC1
4	66346973	66446973	2.62788	SCRN1，WIPF3
19	55420273	55520273	2.62677	QRICH2，RNF157，UBALD2
21	40627349	40727349	2.62649	NOT_FOUND
16	48131781	48231781	2.6264	NOT_FOUND
21	1297948	1397948	2.62218	NOT_FOUND
26	37626471	37726471	2.62053	PDZD8
1	86137652	86237652	2.62049	NOT_FOUND
21	67452017	67552017	2.61986	TRAF3
5	88438468	88538468	2.61933	KCNJ8
13	74298130	74398130	2.61534	PTI，WFDC2
8	36835425	36935425	2.61416	NOT_FOUND
12	80490188	80590188	2.61405	NOT_FOUND
9	83606080	83706080	2.61235	GRM1
5	101653581	101753581	2.6113	CLEC4D，CLEC4E，CLEC6A
4	26640511	26740511	2.60693	NOT_FOUND
11	47314673	47414673	2.60625	RPIA
10	94986929	95086929	2.60487	NOT_FOUND
12	14927281	15027281	2.60296	NOT_FOUND
4	3821861	3921861	2.60051	NOT_FOUND
16	9515708	9615708	2.59544	NOT_FOUND
10	54092171	54192171	2.59348	TEX9
16	49543335	49643335	2.59261	ARHGEF16，PRDM16
10	57099138	57199138	2.59211	NOT_FOUND
12	59237380	59337380	2.59195	NOT_FOUND
29	2841755	2941755	2.5911	NOT_FOUND
10	42164533	42264533	2.58829	NOT_FOUND
18	59231542	59331542	2.5868	NOT_FOUND
15	69399992	69499992	2.58663	NOT_FOUND
10	48579397	48679397	2.58608	NOT_FOUND
5	38281107	38381107	2.5821	PPHLN1，ZCRB1
12	59437879	59537879	2.58209	NOT_FOUND
21	44963667	45063667	2.58167	SNX6，U1，U3
5	53498510	53598510	2.57761	NOT_FOUND
3	38468032	38568032	2.57593	NOT_FOUND
14	24084354	24184354	2.57513	NOT_FOUND
3	21525389	21625389	2.57346	POLR3C，RNF115
20	13863819	13963819	2.57327	SGTB，SHLD3，TRAPPC13，TRIM23
27	24241520	24341520	2.57294	LONRF1
5	29070574	29170574	2.57206	ATF1，TMPRSS12
5	57803433	57903433	2.57051	OR6C22，OR6C38，OR6C4C
4	63431815	63531815	2.56896	BBS9
21	21769405	21869405	2.5663	BLM，FES，FURIN
5	99350947	99450947	2.56568	KLRJ1
3	50065674	50165674	2.56297	DR1
3	51074165	51174165	2.56279	C3H1orf146，GLMN，RPAP2
18	54183670	54283670	2.56	BBC3，CCDC9，INAFM1，SAE1
6	40796190	40896190	2.55884	KCNIP4
11	73445907	73545907	2.55764	ASXL2，KIF3C
28	4492402	4592402	2.55584	DISC1
16	18892457	18992457	2.55447	USH2A
2	23619276	23719276	2.55347	RAPGEF4
4	98715278	98815278	2.55254	AGBL3，CYREN，TMEM140，U6
2	60975471	61075471	2.54735	NOT_FOUND
1	71739579	71839579	2.54548	DLG1，U6
20	20443245	20543245	2.53932	RAB3C
13	75600039	75700039	2.53818	EYA2
18	52265479	52365479	2.5368	ZNF112，ZNF180
4	16688765	16788765	2.52909	NOT_FOUND
16	42283917	42383917	2.52765	UBIAD1
23	43091244	43191244	2.52398	GFOD1
19	50390569	50490569	2.52305	NOT_FOUND
10	53490777	53590777	2.52227	NOT_FOUND
1	78938615	79038615	2.52219	LPP
13	75199452	75299452	2.52203	OCSTAMP，SLC13A3
9	11812265	11912265	2.52199	NOT_FOUND
19	36910963	37010963	2.52187	FAM117A，SLC35B1，SNORA70，SPOP
14	29611124	29711124	2.52131	NOT_FOUND
14	50512365	50612365	2.52116	NOT_FOUND
13	5196786	5296786	2.52053	NOT_FOUND
9	55089375	55189375	2.51856	NOT_FOUND
5	100452207	100552207	2.51824	KLRB1，U6
14	55436215	55536215	2.51767	NOT_FOUND
3	18600767	18700767	2.51673	TCHH，TCHHL1
21	51216034	51316034	2.51627	NOT_FOUND
5	39983053	40083053	2.514	CNTN1
3	54099637	54199637	2.51279	GBP5
1	125632365	125732365	2.51151	SLC9A9
15	33166619	33266619	2.51129	NOT_FOUND
12	39388060	39488060	2.50842	NOT_FOUND
7	56727288	56827288	2.50586	NOT_FOUND
3	12953219	13053219	2.50552	NOT_FOUND
10	52588687	52688687	2.50495	MYZAP，POLR2M
1	154928444	155028444	2.50495	NOT_FOUND
8	15196557	15296557	2.49993	MIR873
1	125732352	125832352	2.49968	NOT_FOUND
23	29164087	29264087	2.49935	OR11A1，OR11A12，OR12D2，OR12D2F，OR12D2G，OR1O5P，OR1O8，OR1O9
3	44539	144539	2.49883	NOT_FOUND
1	75439084	75539084	2.49832	NOT_FOUND
29	37134150	37234150	2.49651	CCDC86，MS4A10，PRPF19，PTGDR2
15	60797096	60897096	2.49594	NOT_FOUND
14	68599977	68699977	2.49446	NOT_FOUND
13	74798864	74898864	2.49407	CD40，CDH22，NCOA5
5	40083168	40183168	2.49319	NOT_FOUND
6	93636890	93736890	2.49205	BMP2K，PAQR3
12	35478345	35578345	2.49156	MICU2，ZDHHC20
9	17636099	17736099	2.4906	NOT_FOUND
21	44761978	44861978	2.48813	NOT_FOUND
14	670944	770944	2.48792	CYC1，EXOSC4，GPAA1，HGH1，MAF1，MROH1，OPLAH，SHARPIN，WDR97
7	53712714	53812714	2.48742	ARHGAP26，FGF1
3	19306710	19406710	2.48646	POGZ，PSMB4
15	68792729	68892729	2.48561	NOT_FOUND
5	93644421	93744421	2.48496	SLC15A5
6	102695296	102795296	2.48169	PPP2R2C
4	118920338	119020338	2.48103	PTPRN2
27	22216157	22316157	2.47637	NOT_FOUND
12	77783463	77883463	2.47622	NALCN
7	89385175	89485175	2.47409	NOT_FOUND
3	18499917	18599917	2.47007	RPTN
11	8067375	8167375	2.4687	NOT_FOUND
7	40348102	40448102	2.46722	RACK1，SNORD96，TRIM41，TRIM52
2	17610237	17710237	2.46708	SESTD1
19	40532349	40632349	2.46649	CDC6，RARA，TOP2A
15	10293037	10393037	2.46609	NOT_FOUND
29	1346447	1446447	2.46608	DEUP1，SMCO4
14	59757144	59857144	2.46436	NOT_FOUND
14	10317671	10417671	2.46318	ASAP1
16	46720228	46820228	2.45858	DNAJC11，KLHL21，PHF13，THAP3，ZBTB48
20	14876038	14976038	2.45789	RGS7BP
16	45510325	45610325	2.45742	UTS2
4	116206226	116306226	2.45531	DPP6
10	95488090	95588090	2.45403	NOT_FOUND
7	72302588	72402588	2.44926	ATP10B
19	25242050	25342050	2.44839	KIAA0753，PITPNM3
15	66566097	66666097	2.44833	LDLRAD3
10	15001593	15101593	2.44523	CALML4，CLN6，PIAS1
26	25819408	25919408	2.44389	SORCS3
10	1670704	1770704	2.44342	EPB41L4A
13	40448486	40548486	2.44034	KIZ
3	12852370	12952370	2.4387	FCRL5
21	62308942	62408942	2.43323	NOT_FOUND
17	63812529	63912529	2.43312	ACACB，FOXN4
20	7689280	7789280	2.43167	ARHGEF28
9	45148693	45248693	2.43131	HACE1
21	3113151	3213151	2.42943	NOT_FOUND
15	23754039	23854039	2.42913	NCAM1
8	69894807	69994807	2.42767	BIN3，C8H8orf58，CCAR2，PDLIM2
21	26408258	26508258	2.42522	ARNT2
2	54665980	54765980	2.42414	NOT_FOUND
24	53607476	53707476	2.42085	MBD2，POLI
19	28662248	28762248	2.42003	STX8
8	47254139	47354139	2.41945	NOT_FOUND
18	33790270	33890270	2.41848	U6
2	136188613	136288613	2.41845	NOT_FOUND
15	63934623	64034623	2.4183	HIPK3，KIAA1549L
7	100539099	100639099	2.41762	NOT_FOUND
10	70830957	70930957	2.41754	DACT1，KIAA0586，U6
16	43392994	43492994	2.4167	UBE4B
20	42205963	42305963	2.41579	CDH6
24	34224517	34324517	2.41556	NOT_FOUND
14	27802363	27902363	2.41551	NKAIN3
8	93937994	94037994	2.41534	NOT_FOUND
6	17747580	17847580	2.41257	NOT_FOUND
27	1658723	1758723	2.41045	NOT_FOUND
11	74051264	74151264	2.41026	DNMT3A，EFR3B，POMC
25	35780340	35880340	2.40944	EPHB4，EPO，SLC12A9，SRRT，TRIP6，ZAN
6	94945327	95045327	2.40848	CFAP299，FGF5
3	72958411	73058411	2.40847	NEGR1
1	2848800	2948800	2.40525	CFAP298，SYNJ1
11	55486989	55586989	2.40515	CTNNA2
4	55792091	55892091	2.40476	IFRD1，LSMEM1
6	90416124	90516124	2.40446	CDKL2，G3BP2
5	57903547	58003547	2.40369	OR6C281，OR6C2F，U6
15	23247986	23347986	2.40352	NOT_FOUND
16	39763285	39863285	2.40268	DNM3
17	23206258	23306258	2.40209	NOT_FOUND
7	82853597	82953597	2.40099	SCARNA18，TMEM167A
12	77683214	77783214	2.39942	NALCN
3	24550861	24650861	2.39862	NOT_FOUND
15	52194201	52294201	2.39849	ARAP1，PDE2A
12	14325786	14425786	2.39816	NOT_FOUND
1	82338160	82438160	2.39743	VPS8
29	9520797	9620797	2.39705	PICALM
16	62448968	62548968	2.39678	CACNA1E
15	5738563	5838563	2.39658	MMP1，MMP12，MMP3
2	134586203	134686203	2.39602	NOT_FOUND
24	24482823	24582823	2.39544	KLHL14
9	100776348	100876348	2.39462	U6
16	30487361	30587361	2.39108	AHCTF1
5	37480191	37580191	2.3903	NOT_FOUND
22	48660750	48760750	2.38921	ALAS1，POC1A，TLR9，TWF2
14	22376079	22476079	2.38745	NOT_FOUND
7	80140481	80240481	2.38585	TENM2
22	58787453	58887453	2.38566	IQSEC1
23	42788480	42888480	2.38549	MCUR1，RNF182
19	14176701	14276701	2.38463	CCL3
17	30024101	30124101	2.38462	NOT_FOUND
24	57122520	57222520	2.3839	NOT_FOUND
1	120033115	120133115	2.38375	NOT_FOUND
5	95346368	95446368	2.38325	ATF7IP，PLBD1，U6
5	7946416	8046416	2.38142	NOT_FOUND
5	106158733	106258733	2.38038	CRACR2A
3	15171898	15271898	2.38001	ASH1L
23	2318986	2418986	2.37932	NOT_FOUND
1	73639325	73739325	2.37757	NOT_FOUND
2	112052306	112152306	2.37395	MRPL44，SERPINE2，U6，WDFY1
27	45102759	45202759	2.37091	NOT_FOUND
6	78942143	79042143	2.37067	NOT_FOUND
7	57933118	58033118	2.37012	PPP2R2B
15	82152520	82252520	2.37011	FAM111B，GLYATL2
22	31850423	31950423	2.36957	NOT_FOUND
22	44306268	44406268	2.36941	ARHGEF3，CCDC66，TASOR
19	40331161	40431161	2.36876	CSF3，MED24，MSL1，NR1D1，SNORD124，THRA
21	67754551	67854551	2.36773	EXOC3L4，TNFAIP2
11	40655748	40755748	2.36678	VRK2
5	48392671	48492671	2.36572	MSRB3
28	39754329	39854329	2.36542	NOT_FOUND
10	6582084	6682084	2.36433	ANKRD31
13	24725427	24825427	2.36421	NOT_FOUND
1	52742122	52842122	2.3632	CD47
5	70618088	70718088	2.36003	BTBD11
5	12451568	12551568	2.35886	TMTC2，U6
27	31735363	31835363	2.35874	NOT_FOUND
27	10165248	10265248	2.35832	NOT_FOUND
10	99898309	99998309	2.35739	KCNK10
10	42364998	42464998	2.35509	NOT_FOUND
2	67685565	67785565	2.35458	DPP10
12	86705632	86805632	2.3534	ATP4B，GRK1，TFDP1，TMEM255B
2	61776676	61876676	2.35265	R3HDM1，U6，ZRANB3
8	110267325	110367325	2.3521	C5，TRAF1
22	44508802	44608802	2.35184	ERC2
11	105025353	105125353	2.34795	RXRA
6	117390043	117490043	2.34732	CPLX1，DGKQ，GAK，TMEM175
2	125372343	125472343	2.3472	EYA3，RPA2，SMPDL3B，XKR8
26	37222811	37322811	2.34496	ENO4，HSPA12A，SHTN1
9	66636632	66736632	2.34449	NOT_FOUND
17	49976318	50076318	2.34449	NOT_FOUND
15	80027099	80127099	2.34403	NOT_FOUND
1	36944236	37044236	2.34363	NOT_FOUND
11	17954869	18054869	2.34157	NOT_FOUND
7	74111332	74211332	2.34149	NOT_FOUND
9	58302525	58402525	2.3412	NOT_FOUND
5	1939546	2039546	2.34078	TRHDE
25	33364952	33464952	2.33984	TMEM270
1	136430920	136530920	2.33922	NOT_FOUND
29	36835088	36935088	2.33889	NOT_FOUND
6	76627217	76727217	2.33886	NOT_FOUND
28	36511853	36611853	2.33721	NOT_FOUND
1	59841171	59941171	2.3366	NOT_FOUND
2	97931063	98031063	2.33628	ACADL，KANSL1L
1	59741185	59841185	2.33555	NOT_FOUND
1	87137518	87237518	2.33245	PEX5L
13	78804739	78904739	2.33204	ADNP，BCAS4，DPM1，MOCS3
15	68995150	69095150	2.33079	U6
15	20211670	20311670	2.33039	RDX，ZC3H12C
9	54486910	54586910	2.32993	NOT_FOUND
21	43249309	43349309	2.32983	NOT_FOUND
6	102594647	102694647	2.32814	NOT_FOUND
23	30274222	30374222	2.32711	ZSCAN12
4	14376743	14476743	2.32451	DLX5，DLX6
11	100081606	100181606	2.32364	PRRX2，PTGES
3	79916997	80016997	2.32342	DNAJC6，LEPROT
1	27945440	28045440	2.32041	NOT_FOUND
1	37344183	37444183	2.32039	EPHA3
17	42456639	42556639	2.32009	PDGFC
16	47123529	47223529	2.3187	CHD5，RNF207，RPL22
14	32525239	32625239	2.3179	C14H8orf34
10	85865794	85965794	2.31735	AREL1，LTBP2
1	62840770	62940770	2.31337	NOT_FOUND
4	68658995	68758995	2.31227	NOT_FOUND
17	70329585	70429585	2.3116	DEPDC5，PRR14L，U4
4	23323262	23423262	2.30991	NOT_FOUND
10	54192403	54292403	2.30937	RFX7

## Sheet: Table S7
Table S7. 106 overlapping genomic regions
Chromosome	Position start site(bp)	Position end site (bp)	Gene
1	52742122	52815314	CD47
1	106934868	107015856	KPNA4，SCARNA7
1	148529301	148616272	DOP1B，MORC3
1	148616273	148629301	MORC3
3	14671601	14767653	LAMTOR2，MEX3A，RAB25，SSR2，UBQLN4
3	14871603	14969351	GON4L，SYT11
3	14970200	14971603	GON4L
3	19371648	19406710	PSMB4
3	19971654	20011804	CTSS
3	21571670	21625389	RNF115
3	27273786	27371727	SLC22A15
3	31610296	31671770	RAP1A
3	91716337	91772371	ACOT11
4	14394491	14476743	DLX5，DLX6
4	29053056	29094637	ITGB8
5	100517916	100552207	KLRB1
5	108617997	108661481	CACNA1C
6	95750518	95839421	BMP3
6	95839422	95850518	BMP3
6	95951816	96039423	PRKG2
6	96239426	96253114	RASGEF1B
6	102695296	102739490	PPP2R2C
7	53712714	53731532	FGF1
7	66072468	66131656	GEMIN5，MRPL22
7	103855130	103932034	U6
7	107975048	108032075	FER
8	6910576	6981621	GLRA3
8	6981801	7010576	GLRA3
8	43810945	43847841	KANK1
9	15427058	15516502	MYO6
9	15516503	15527058	MYO6
9	31693629	31716664	MAN1A1
9	45148693	45216799	HACE1
9	61114031	61116958	RNGTT
10	44893703	44970804	NID2
10	46393718	46474288	FBXL22，USP3
10	50793762	50884507	FAM81A
10	52593780	52688687	MYZAP
10	52688919	52693780	MYZAP
10	54092171	54093794	TEX9
10	54593800	54693332	PRTG
10	54693564	54693800	PRTG
10	55093805	55094261	RAB27A
10	70893963	70930957	DACT1
10	71432350	71493968	DAAM1
10	71493969	71532350	DAAM1
10	71632815	71693970	DAAM1，U6
10	79150233	79194045	PALS1
10	80094055	80152324	RAD51B
10	85894113	85965794	AREL1，LTBP2
11	56899489	56991683	U6
11	78491899	78590547	PUM2
11	99092105	99172678	DYNC2I2，SPTAN1
11	101998569	102092134	MED27
12	12691906	12721552	TNFSF11
13	12198938	12206920	NUDT5
13	74798864	74799563	NCOA5
14	469971	565742	ADCK5，CPSF1，CYHR1，FOXH1，KIFC2，SLC39A4，TONSL，VPS28
14	565743	569971	ADCK5
14	570458	665743	ADCK5，BOP1，DGAT1，FBXL6，HSF1，MROH1，SCRT1，SCX，SLC52A2，TMEM249
14	665744	670458	MROH1
14	670944	765744	CYC1，EXOSC4，GPAA1，HGH1，MAF1，MROH1，OPLAH，SHARPIN，WDR97
14	765745	770944	OPLAH
14	771431	865745	GRINA，OPLAH，PARP10，PLEC，SPATC1
14	10317671	10365840	ASAP1
14	22865966	22878026	XKR4
14	22878513	22965966	XKR4
14	23165969	23179486	LYN
14	23179973	23265969	LYN
14	23265970	23279973	RPS20
14	23280460	23365970	MOS，PLAG1，U1
16	18939842	18992457	USH2A
16	35831100	35840010	RGS7
16	47140124	47223529	CHD5，RPL22
16	47325179	47340125	NPHP4
16	48635908	48640138	AJAP1
16	49140144	49240034	C16H1orf174，CEP104，DFFB
16	49340146	49340859	TP73
16	71640369	71724067	LPGAT1
18	1887722	1961020	GLG1，PDPR
18	1961021	1987722	GLG1
18	24161243	24198356	NUDT21，OGFOD1，U6
18	24199314	24261243	AMFR，GNAO1，NUDT21
18	35861360	35909418	ZFP90
19	37212745	37273033	ZNF652
19	39973061	40028785	NEUROD2，PPP1R1B，STARD3
19	40373065	40431161	MSL1，NR1D1，THRA
19	46873130	46969776	METTL2A，TLK2
19	52073182	52100074	ENDOV
19	52503045	52573186	CCDC40，TBC1D16
20	20253866	20340801	PDE4D
20	20453868	20543245	RAB3C
21	6922956	6944402	MEF2A
21	6945247	7022956	MEF2A
21	7022957	7045247	MEF2A
21	32458935	32523211	PEAK1
21	32523212	32558935	HMG20A，PEAK1
21	32559780	32623212	HMG20A
21	44963667	45023336	SNX6，U1，U3
22	2718552	2785518	AZI2，CMC1
22	19394578	19418718	GRM7
23	13799460	13823108	DAAM2
25	18740190	18771341	DNAH3
25	18771982	18840190	DNAH3
26	38235152	38331961	RAB11FIP2
29	37162568	37234150	CCDC86，PRPF19，PTGDR2

## Sheet: Table S8
Table S8. GO and KEGG enrichment analysis of CRS candidate genes by iHS and CLR methods.
Term	Database	ID	Input number	Background number	p-Value	Corrected p-Value	Input	Hyperlink
mRNA surveillance pathway	KEGG PATHWAY	bta03015	4	95	0.00112712	0.0574238	NUDT21|CPSF1|PPP2R2C|RNGTT	http://www.genome.jp/kegg-bin/show_pathway?bta03015/bta:511408%09red/bta:518859%09red/bta:782110%09red/bta:282703%09red
Long-term depression	KEGG PATHWAY	bta04730	3	60	0.00304405	0.089292	GNAO1|LYN|PRKG2	http://www.genome.jp/kegg-bin/show_pathway?bta04730/bta:281792%09red/bta:534996%09red/bta:533330%09red
Dopaminergic synapse	KEGG PATHWAY	bta04728	4	132	0.00358556	0.0964118	GNAO1|PPP1R1B|PPP2R2C|CACNA1C	http://www.genome.jp/kegg-bin/show_pathway?bta04728/bta:281792%09red/bta:408015%09red/bta:782110%09red/bta:282459%09red
Protein processing in endoplasmic reticulum	KEGG PATHWAY	bta04141	4	165	0.00768685	0.144858	SSR2|AMFR|UBQLN4|MAN1A1	http://www.genome.jp/kegg-bin/show_pathway?bta04141/bta:506530%09red/bta:533021%09red/bta:530027%09red/bta:507541%09red
Circadian entrainment	KEGG PATHWAY	bta04713	3	100	0.0118775	0.153386	GNAO1|CACNA1C|PRKG2	http://www.genome.jp/kegg-bin/show_pathway?bta04713/bta:281792%09red/bta:533330%09red/bta:408015%09red
Parathyroid hormone synthesis, secretion and action	KEGG PATHWAY	bta04928	3	104	0.0131562	0.153386	TNFSF11|PDE4D|MEF2A	http://www.genome.jp/kegg-bin/show_pathway?bta04928/bta:539556%09red/bta:407231%09red/bta:513836%09red
Glutamatergic synapse	KEGG PATHWAY	bta04724	3	113	0.0163106	0.153386	GNAO1|CACNA1C|GRM7	http://www.genome.jp/kegg-bin/show_pathway?bta04724/bta:535362%09red/bta:281792%09red/bta:408015%09red
Platelet activation	KEGG PATHWAY	bta04611	3	121	0.0194404	0.153386	LYN|RAP1A|PRKG2	http://www.genome.jp/kegg-bin/show_pathway?bta04611/bta:282031%09red/bta:534996%09red/bta:533330%09red
cAMP signaling pathway	KEGG PATHWAY	bta04024	4	228	0.0221621	0.153386	CACNA1C|PPP1R1B|PDE4D|RAP1A	http://www.genome.jp/kegg-bin/show_pathway?bta04024/bta:282031%09red/bta:539556%09red/bta:408015%09red/bta:282459%09red
Endocytosis	KEGG PATHWAY	bta04144	4	246	0.02814	0.153386	RAB11FIP2|VPS28|ASAP1|SNX6	http://www.genome.jp/kegg-bin/show_pathway?bta04144/bta:540709%09red/bta:532685%09red/bta:618785%09red/bta:327705%09red
Apoptosis	KEGG PATHWAY	bta04210	3	142	0.0291261	0.153386	SPTAN1|CTSS|DFFB	http://www.genome.jp/kegg-bin/show_pathway?bta04210/bta:540108%09red/bta:327711%09red/bta:512730%09red
Hippo signaling pathway	KEGG PATHWAY	bta04390	3	151	0.0339267	0.153386	TP73|PPP2R2C|FGF1	http://www.genome.jp/kegg-bin/show_pathway?bta04390/bta:515105%09red/bta:782110%09red/bta:281160%09red
Ribosome	KEGG PATHWAY	bta03010	3	160	0.0391123	0.153386	MRPL22|RPS20|RPL22	http://www.genome.jp/kegg-bin/show_pathway?bta03010/bta:513222%09red/bta:614639%09red/bta:616065%09red
Amphetamine addiction	KEGG PATHWAY	bta05031	2	67	0.0399452	0.153386	CACNA1C|PPP1R1B	http://www.genome.jp/kegg-bin/show_pathway?bta05031/bta:408015%09red/bta:282459%09red
Long-term potentiation	KEGG PATHWAY	bta04720	2	69	0.0420642	0.153386	CACNA1C|RAP1A	http://www.genome.jp/kegg-bin/show_pathway?bta04720/bta:282031%09red/bta:408015%09red
cGMP-PKG signaling pathway	KEGG PATHWAY	bta04022	3	169	0.0446769	0.153386	MEF2A|CACNA1C|PRKG2	http://www.genome.jp/kegg-bin/show_pathway?bta04022/bta:407231%09red/bta:533330%09red/bta:408015%09red
Renin secretion	KEGG PATHWAY	bta04924	2	72	0.0453199	0.153386	CACNA1C|PRKG2	http://www.genome.jp/kegg-bin/show_pathway?bta04924/bta:533330%09red/bta:408015%09red
Arrhythmogenic right ventricular cardiomyopathy (ARVC)	KEGG PATHWAY	bta05412	2	76	0.0498001	0.153386	ITGB8|CACNA1C	http://www.genome.jp/kegg-bin/show_pathway?bta05412/bta:536286%09red/bta:408015%09red
ECM-receptor interaction	KEGG PATHWAY	bta04512	2	87	0.0628873	0.163203	ITGB8|CD47	http://www.genome.jp/kegg-bin/show_pathway?bta04512/bta:536286%09red/bta:282661%09red
Cardiac muscle contraction	KEGG PATHWAY	bta04260	2	90	0.0666383	0.164137	CACNA1C|CYC1	http://www.genome.jp/kegg-bin/show_pathway?bta04260/bta:512500%09red/bta:408015%09red
GABAergic synapse	KEGG PATHWAY	bta04727	2	90	0.0666383	0.164137	GNAO1|CACNA1C	http://www.genome.jp/kegg-bin/show_pathway?bta04727/bta:281792%09red/bta:408015%09red
Morphine addiction	KEGG PATHWAY	bta05032	2	92	0.0691795	0.166277	GNAO1|PDE4D	http://www.genome.jp/kegg-bin/show_pathway?bta05032/bta:281792%09red/bta:539556%09red
Hypertrophic cardiomyopathy (HCM)	KEGG PATHWAY	bta05410	2	92	0.0691795	0.166277	ITGB8|CACNA1C	http://www.genome.jp/kegg-bin/show_pathway?bta05410/bta:536286%09red/bta:408015%09red
Fc gamma R-mediated phagocytosis	KEGG PATHWAY	bta04666	2	94	0.0717522	0.168175	LYN|ASAP1	http://www.genome.jp/kegg-bin/show_pathway?bta04666/bta:327705%09red/bta:534996%09red
Regulation of actin cytoskeleton	KEGG PATHWAY	bta04810	3	212	0.0762367	0.173976	MOS|ITGB8|FGF1	http://www.genome.jp/kegg-bin/show_pathway?bta04810/bta:536286%09red/bta:444869%09red/bta:281160%09red
Dilated cardiomyopathy (DCM)	KEGG PATHWAY	bta05414	2	99	0.0783169	0.173976	ITGB8|CACNA1C	http://www.genome.jp/kegg-bin/show_pathway?bta05414/bta:536286%09red/bta:408015%09red
Rap1 signaling pathway	KEGG PATHWAY	bta04015	3	216	0.0795659	0.174253	GNAO1|RAP1A|FGF1	http://www.genome.jp/kegg-bin/show_pathway?bta04015/bta:282031%09red/bta:281792%09red/bta:281160%09red
NF-kappa B signaling pathway	KEGG PATHWAY	bta04064	2	102	0.082343	0.175662	TNFSF11|LYN	http://www.genome.jp/kegg-bin/show_pathway?bta04064/bta:513836%09red/bta:534996%09red
Cholinergic synapse	KEGG PATHWAY	bta04725	2	114	0.0990477	0.188973	GNAO1|CACNA1C	http://www.genome.jp/kegg-bin/show_pathway?bta04725/bta:281792%09red/bta:408015%09red
Serotonergic synapse	KEGG PATHWAY	bta04726	2	116	0.101918	0.191196	GNAO1|CACNA1C	http://www.genome.jp/kegg-bin/show_pathway?bta04726/bta:281792%09red/bta:408015%09red
Chagas disease (American trypanosomiasis)	KEGG PATHWAY	bta05142	2	116	0.101918	0.191196	GNAO1|PPP2R2C	http://www.genome.jp/kegg-bin/show_pathway?bta05142/bta:281792%09red/bta:782110%09red
Thyroid hormone signaling pathway	KEGG PATHWAY	bta04919	2	118	0.104812	0.193622	MED27|THRA	http://www.genome.jp/kegg-bin/show_pathway?bta04919/bta:525389%09red/bta:532621%09red
Neurotrophin signaling pathway	KEGG PATHWAY	bta04722	2	122	0.110665	0.199486	TP73|RAP1A	http://www.genome.jp/kegg-bin/show_pathway?bta04722/bta:282031%09red/bta:515105%09red
Glycosylphosphatidylinositol (GPI)-anchor biosynthesis	KEGG PATHWAY	bta00563	1	26	0.116519	0.206198	GPAA1	http://www.genome.jp/kegg-bin/show_pathway?bta00563/bta:513395%09red
Purine metabolism	KEGG PATHWAY	bta00230	2	135	0.130243	0.217914	PDE4D|NUDT5	http://www.genome.jp/kegg-bin/show_pathway?bta00230/bta:614149%09red/bta:539556%09red
Circadian rhythm	KEGG PATHWAY	bta04710	1	31	0.136568	0.221437	NR1D1	http://www.genome.jp/kegg-bin/show_pathway?bta04710/bta:768225%09red
MAPK signaling pathway	KEGG PATHWAY	bta04010	3	292	0.153372	0.238851	CACNA1C|RAP1A|FGF1	http://www.genome.jp/kegg-bin/show_pathway?bta04010/bta:282031%09red/bta:408015%09red/bta:281160%09red
Adrenergic signaling in cardiomyocytes	KEGG PATHWAY	bta04261	2	150	0.153723	0.238851	CACNA1C|PPP2R2C	http://www.genome.jp/kegg-bin/show_pathway?bta04261/bta:782110%09red/bta:408015%09red
Breast cancer	KEGG PATHWAY	bta05224	2	150	0.153723	0.238851	TNFSF11|FGF1	http://www.genome.jp/kegg-bin/show_pathway?bta05224/bta:513836%09red/bta:281160%09red
Oxytocin signaling pathway	KEGG PATHWAY	bta04921	2	152	0.156914	0.2411	GNAO1|CACNA1C	http://www.genome.jp/kegg-bin/show_pathway?bta04921/bta:281792%09red/bta:408015%09red
Retrograde endocannabinoid signaling	KEGG PATHWAY	bta04723	2	152	0.156914	0.2411	GNAO1|CACNA1C	http://www.genome.jp/kegg-bin/show_pathway?bta04723/bta:281792%09red/bta:408015%09red
Cushing syndrome	KEGG PATHWAY	bta04934	2	156	0.163334	0.245947	CACNA1C|RAP1A	http://www.genome.jp/kegg-bin/show_pathway?bta04934/bta:282031%09red/bta:408015%09red
Cell adhesion molecules (CAMs)	KEGG PATHWAY	bta04514	2	159	0.16818	0.249308	ITGB8|GLG1	http://www.genome.jp/kegg-bin/show_pathway?bta04514/bta:536286%09red/bta:281196%09red
Wnt signaling pathway	KEGG PATHWAY	bta04310	2	161	0.171424	0.251569	DAAM1|DAAM2	http://www.genome.jp/kegg-bin/show_pathway?bta04310/bta:513742%09red/bta:783665%09red
Homologous recombination	KEGG PATHWAY	bta03440	1	42	0.1791	0.258373	RAD51B	http://www.genome.jp/kegg-bin/show_pathway?bta03440/bta:617007%09red
Type II diabetes mellitus	KEGG PATHWAY	bta04930	1	46	0.194045	0.270267	CACNA1C	http://www.genome.jp/kegg-bin/show_pathway?bta04930/bta:408015%09red
Proteasome	KEGG PATHWAY	bta03050	1	46	0.194045	0.270267	PSMB4	http://www.genome.jp/kegg-bin/show_pathway?bta03050/bta:506203%09red
Mineral absorption	KEGG PATHWAY	bta04978	1	47	0.197739	0.273835	SLC39A4	http://www.genome.jp/kegg-bin/show_pathway?bta04978/bta:510951%09red
Tight junction	KEGG PATHWAY	bta04530	2	178	0.199378	0.275712	RAP1A|PPP2R2C	http://www.genome.jp/kegg-bin/show_pathway?bta04530/bta:282031%09red/bta:782110%09red
Cocaine addiction	KEGG PATHWAY	bta05030	1	48	0.201416	0.27734	PPP1R1B	http://www.genome.jp/kegg-bin/show_pathway?bta05030/bta:282459%09red
Fat digestion and absorption	KEGG PATHWAY	bta04975	1	48	0.201416	0.27734	DGAT1	http://www.genome.jp/kegg-bin/show_pathway?bta04975/bta:282609%09red
Alzheimer disease	KEGG PATHWAY	bta05010	2	180	0.202704	0.278718	CACNA1C|CYC1	http://www.genome.jp/kegg-bin/show_pathway?bta05010/bta:512500%09red/bta:408015%09red
Cholesterol metabolism	KEGG PATHWAY	bta04979	1	50	0.20872	0.283367	STARD3	http://www.genome.jp/kegg-bin/show_pathway?bta04979/bta:511267%09red
N-Glycan biosynthesis	KEGG PATHWAY	bta00510	1	51	0.212347	0.287083	MAN1A1	http://www.genome.jp/kegg-bin/show_pathway?bta00510/bta:530027%09red
Chemokine signaling pathway	KEGG PATHWAY	bta04062	2	189	0.217745	0.291935	LYN|RAP1A	http://www.genome.jp/kegg-bin/show_pathway?bta04062/bta:282031%09red/bta:534996%09red
Legionellosis	KEGG PATHWAY	bta05134	1	56	0.230236	0.300767	HSF1	http://www.genome.jp/kegg-bin/show_pathway?bta05134/bta:506235%09red
Focal adhesion	KEGG PATHWAY	bta04510	2	198	0.232882	0.301713	ITGB8|RAP1A	http://www.genome.jp/kegg-bin/show_pathway?bta04510/bta:282031%09red/bta:536286%09red
Neuroactive ligand-receptor interaction	KEGG PATHWAY	bta04080	3	363	0.235371	0.303382	GLRA3|GRM7|THRA	http://www.genome.jp/kegg-bin/show_pathway?bta04080/bta:535362%09red/bta:532621%09red/bta:541160%09red
Regulation of lipolysis in adipocytes	KEGG PATHWAY	bta04923	1	58	0.237278	0.304219	PRKG2	http://www.genome.jp/kegg-bin/show_pathway?bta04923/bta:533330%09red
Malaria	KEGG PATHWAY	bta05144	1	59	0.240776	0.307481	KLRB1	http://www.genome.jp/kegg-bin/show_pathway?bta05144/bta:407181%09red
Glutathione metabolism	KEGG PATHWAY	bta00480	1	60	0.244257	0.310697	OPLAH	http://www.genome.jp/kegg-bin/show_pathway?bta00480/bta:408006%09red
PI3K-Akt signaling pathway	KEGG PATHWAY	bta04151	3	373	0.24753	0.313049	ITGB8|PPP2R2C|FGF1	http://www.genome.jp/kegg-bin/show_pathway?bta04151/bta:536286%09red/bta:782110%09red/bta:281160%09red
Retinol metabolism	KEGG PATHWAY	bta00830	1	64	0.258024	0.321865	DGAT1	http://www.genome.jp/kegg-bin/show_pathway?bta00830/bta:282609%09red
Cortisol synthesis and secretion	KEGG PATHWAY	bta04927	1	65	0.261427	0.324264	CACNA1C	http://www.genome.jp/kegg-bin/show_pathway?bta04927/bta:408015%09red
Glycerolipid metabolism	KEGG PATHWAY	bta00561	1	67	0.268186	0.329865	DGAT1	http://www.genome.jp/kegg-bin/show_pathway?bta00561/bta:282609%09red
Alcoholism	KEGG PATHWAY	bta05034	2	224	0.276863	0.337962	GNAO1|PPP1R1B	http://www.genome.jp/kegg-bin/show_pathway?bta05034/bta:281792%09red/bta:282459%09red
Fc epsilon RI signaling pathway	KEGG PATHWAY	bta04664	1	70	0.27821	0.338751	LYN	http://www.genome.jp/kegg-bin/show_pathway?bta04664/bta:534996%09red
Renal cell carcinoma	KEGG PATHWAY	bta05211	1	71	0.28152	0.342352	RAP1A	http://www.genome.jp/kegg-bin/show_pathway?bta05211/bta:282031%09red
Melanoma	KEGG PATHWAY	bta05218	1	73	0.288097	0.348162	FGF1	http://www.genome.jp/kegg-bin/show_pathway?bta05218/bta:281160%09red
p53 signaling pathway	KEGG PATHWAY	bta04115	1	77	0.301071	0.358471	TP73	http://www.genome.jp/kegg-bin/show_pathway?bta04115/bta:515105%09red
Thermogenesis	KEGG PATHWAY	bta04714	2	239	0.302218	0.359394	CYC1|PRKG2	http://www.genome.jp/kegg-bin/show_pathway?bta04714/bta:512500%09red/bta:533330%09red
Ras signaling pathway	KEGG PATHWAY	bta04014	2	242	0.307274	0.362523	RAP1A|FGF1	http://www.genome.jp/kegg-bin/show_pathway?bta04014/bta:282031%09red/bta:281160%09red
RNA degradation	KEGG PATHWAY	bta03018	1	79	0.30747	0.362523	EXOSC4	http://www.genome.jp/kegg-bin/show_pathway?bta03018/bta:618292%09red
Taste transduction	KEGG PATHWAY	bta04742	1	79	0.30747	0.362523	CACNA1C	http://www.genome.jp/kegg-bin/show_pathway?bta04742/bta:408015%09red
Prolactin signaling pathway	KEGG PATHWAY	bta04917	1	83	0.320094	0.373147	TNFSF11	http://www.genome.jp/kegg-bin/show_pathway?bta04917/bta:513836%09red
Antigen processing and presentation	KEGG PATHWAY	bta04612	1	85	0.32632	0.377393	CTSS	http://www.genome.jp/kegg-bin/show_pathway?bta04612/bta:327711%09red
Insulin secretion	KEGG PATHWAY	bta04911	1	85	0.32632	0.377393	CACNA1C	http://www.genome.jp/kegg-bin/show_pathway?bta04911/bta:408015%09red
B cell receptor signaling pathway	KEGG PATHWAY	bta04662	1	86	0.329412	0.380061	LYN	http://www.genome.jp/kegg-bin/show_pathway?bta04662/bta:534996%09red
Progesterone-mediated oocyte maturation	KEGG PATHWAY	bta04914	1	88	0.335553	0.385107	MOS	http://www.genome.jp/kegg-bin/show_pathway?bta04914/bta:444869%09red
Gap junction	KEGG PATHWAY	bta04540	1	90	0.341639	0.390444	PRKG2	http://www.genome.jp/kegg-bin/show_pathway?bta04540/bta:533330%09red
GnRH signaling pathway	KEGG PATHWAY	bta04912	1	93	0.350664	0.398875	CACNA1C	http://www.genome.jp/kegg-bin/show_pathway?bta04912/bta:408015%09red
Salivary secretion	KEGG PATHWAY	bta04970	1	93	0.350664	0.398875	PRKG2	http://www.genome.jp/kegg-bin/show_pathway?bta04970/bta:533330%09red
Aldosterone synthesis and secretion	KEGG PATHWAY	bta04925	1	96	0.359566	0.408042	CACNA1C	http://www.genome.jp/kegg-bin/show_pathway?bta04925/bta:408015%09red
Pancreatic secretion	KEGG PATHWAY	bta04972	1	97	0.362506	0.410416	RAP1A	http://www.genome.jp/kegg-bin/show_pathway?bta04972/bta:282031%09red
Rheumatoid arthritis	KEGG PATHWAY	bta05323	1	102	0.377008	0.422878	TNFSF11	http://www.genome.jp/kegg-bin/show_pathway?bta05323/bta:513836%09red
Melanogenesis	KEGG PATHWAY	bta04916	1	102	0.377008	0.422878	GNAO1	http://www.genome.jp/kegg-bin/show_pathway?bta04916/bta:281792%09red
RIG-I-like receptor signaling pathway	KEGG PATHWAY	bta04622	1	102	0.377008	0.422878	AZI2	http://www.genome.jp/kegg-bin/show_pathway?bta04622/bta:767932%09red
Glycerophospholipid metabolism	KEGG PATHWAY	bta00564	1	103	0.379868	0.425593	LPGAT1	http://www.genome.jp/kegg-bin/show_pathway?bta00564/bta:541208%09red
Leukocyte transendothelial migration	KEGG PATHWAY	bta04670	1	113	0.407769	0.45008	RAP1A	http://www.genome.jp/kegg-bin/show_pathway?bta04670/bta:282031%09red
Toxoplasmosis	KEGG PATHWAY	bta05145	1	113	0.407769	0.45008	GNAO1	http://www.genome.jp/kegg-bin/show_pathway?bta05145/bta:281792%09red
Oocyte meiosis	KEGG PATHWAY	bta04114	1	119	0.423908	0.464189	MOS	http://www.genome.jp/kegg-bin/show_pathway?bta04114/bta:444869%09red
Sphingolipid signaling pathway	KEGG PATHWAY	bta04071	1	120	0.426555	0.466559	PPP2R2C	http://www.genome.jp/kegg-bin/show_pathway?bta04071/bta:782110%09red
Lysosome	KEGG PATHWAY	bta04142	1	123	0.434424	0.473561	CTSS	http://www.genome.jp/kegg-bin/show_pathway?bta04142/bta:327711%09red
AMPK signaling pathway	KEGG PATHWAY	bta04152	1	123	0.434424	0.473561	PPP2R2C	http://www.genome.jp/kegg-bin/show_pathway?bta04152/bta:782110%09red
Cytokine-cytokine receptor interaction	KEGG PATHWAY	bta04060	2	323	0.439148	0.477065	TNFSF11|BMP3	http://www.genome.jp/kegg-bin/show_pathway?bta04060/bta:539527%09red/bta:513836%09red
Relaxin signaling pathway	KEGG PATHWAY	bta04926	1	132	0.457393	0.491405	GNAO1	http://www.genome.jp/kegg-bin/show_pathway?bta04926/bta:281792%09red
Vascular smooth muscle contraction	KEGG PATHWAY	bta04270	1	133	0.459887	0.492445	CACNA1C	http://www.genome.jp/kegg-bin/show_pathway?bta04270/bta:408015%09red
Osteoclast differentiation	KEGG PATHWAY	bta04380	1	133	0.459887	0.492445	TNFSF11	http://www.genome.jp/kegg-bin/show_pathway?bta04380/bta:513836%09red
Spliceosome	KEGG PATHWAY	bta03040	1	133	0.459887	0.492445	PRPF19	http://www.genome.jp/kegg-bin/show_pathway?bta03040/bta:513868%09red
Estrogen signaling pathway	KEGG PATHWAY	bta04915	1	138	0.472189	0.503931	GNAO1	http://www.genome.jp/kegg-bin/show_pathway?bta04915/bta:281792%09red
Human papillomavirus infection	KEGG PATHWAY	bta05165	2	345	0.472696	0.503931	ITGB8|PPP2R2C	http://www.genome.jp/kegg-bin/show_pathway?bta05165/bta:536286%09red/bta:782110%09red
Signaling pathways regulating pluripotency of stem cells	KEGG PATHWAY	bta04550	1	139	0.474616	0.504866	DLX5	http://www.genome.jp/kegg-bin/show_pathway?bta04550/bta:507415%09red
Apelin signaling pathway	KEGG PATHWAY	bta04371	1	140	0.477031	0.505215	MEF2A	http://www.genome.jp/kegg-bin/show_pathway?bta04371/bta:407231%09red
Ubiquitin mediated proteolysis	KEGG PATHWAY	bta04120	1	140	0.477031	0.505215	PRPF19	http://www.genome.jp/kegg-bin/show_pathway?bta04120/bta:513868%09red
Oxidative phosphorylation	KEGG PATHWAY	bta00190	1	140	0.477031	0.505215	CYC1	http://www.genome.jp/kegg-bin/show_pathway?bta00190/bta:512500%09red
Fluid shear stress and atherosclerosis	KEGG PATHWAY	bta05418	1	145	0.488945	0.516702	MEF2A	http://www.genome.jp/kegg-bin/show_pathway?bta05418/bta:407231%09red
Parkinson disease	KEGG PATHWAY	bta05012	1	150	0.50059	0.527855	CYC1	http://www.genome.jp/kegg-bin/show_pathway?bta05012/bta:512500%09red
Measles	KEGG PATHWAY	bta05162	1	152	0.505174	0.531531	TP73	http://www.genome.jp/kegg-bin/show_pathway?bta05162/bta:515105%09red
Phospholipase D signaling pathway	KEGG PATHWAY	bta04072	1	152	0.505174	0.531531	GRM7	http://www.genome.jp/kegg-bin/show_pathway?bta04072/bta:535362%09red
Gastric cancer	KEGG PATHWAY	bta05226	1	153	0.50745	0.533346	FGF1	http://www.genome.jp/kegg-bin/show_pathway?bta05226/bta:281160%09red
mTOR signaling pathway	KEGG PATHWAY	bta04150	1	154	0.509716	0.535146	LAMTOR2	http://www.genome.jp/kegg-bin/show_pathway?bta04150/bta:616375%09red
Metabolic pathways	KEGG PATHWAY	bta01100	7	1468	0.515565	0.539531	DGAT1|CYC1|NUDT5|MAN1A1|GPAA1|PDE4D|OPLAH	http://www.genome.jp/kegg-bin/show_pathway?bta01100/bta:530027%09red/bta:539556%09red/bta:512500%09red/bta:513395%09red/bta:614149%09red/bta:282609%09red/bta:408006%09red
Non-alcoholic fatty liver disease (NAFLD)	KEGG PATHWAY	bta04932	1	158	0.518676	0.542201	CYC1	http://www.genome.jp/kegg-bin/show_pathway?bta04932/bta:512500%09red
Hepatitis C	KEGG PATHWAY	bta05160	1	164	0.531813	0.553542	PPP2R2C	http://www.genome.jp/kegg-bin/show_pathway?bta05160/bta:782110%09red
RNA transport	KEGG PATHWAY	bta03013	1	164	0.531813	0.553542	GEMIN5	http://www.genome.jp/kegg-bin/show_pathway?bta03013/bta:533444%09red
Phagosome	KEGG PATHWAY	bta04145	1	170	0.544593	0.564418	CTSS	http://www.genome.jp/kegg-bin/show_pathway?bta04145/bta:327711%09red
Tuberculosis	KEGG PATHWAY	bta05152	1	198	0.599805	0.615054	CTSS	http://www.genome.jp/kegg-bin/show_pathway?bta05152/bta:327711%09red
Huntington disease	KEGG PATHWAY	bta05016	1	198	0.599805	0.615054	CYC1	http://www.genome.jp/kegg-bin/show_pathway?bta05016/bta:512500%09red
Calcium signaling pathway	KEGG PATHWAY	bta04020	1	203	0.60894	0.623761	CACNA1C	http://www.genome.jp/kegg-bin/show_pathway?bta04020/bta:408015%09red
Kaposi sarcoma-associated herpesvirus infection	KEGG PATHWAY	bta05167	1	206	0.614321	0.628608	LYN	http://www.genome.jp/kegg-bin/show_pathway?bta05167/bta:534996%09red
Epstein-Barr virus infection	KEGG PATHWAY	bta05169	1	228	0.651603	0.659782	LYN	http://www.genome.jp/kegg-bin/show_pathway?bta05169/bta:534996%09red
Human immunodeficiency virus 1 infection	KEGG PATHWAY	bta05170	1	234	0.661134	0.668733	GNAO1	http://www.genome.jp/kegg-bin/show_pathway?bta05170/bta:281792%09red
Viral carcinogenesis	KEGG PATHWAY	bta05203	1	241	0.671928	0.678941	LYN	http://www.genome.jp/kegg-bin/show_pathway?bta05203/bta:534996%09red
Human cytomegalovirus infection	KEGG PATHWAY	bta05163	1	245	0.677941	0.684304	GNAO1	http://www.genome.jp/kegg-bin/show_pathway?bta05163/bta:281792%09red
Herpes simplex virus 1 infection	KEGG PATHWAY	bta05168	1	405	0.84667	0.85195	ZFP90	http://www.genome.jp/kegg-bin/show_pathway?bta05168/bta:100139934%09red
Pathways in cancer	KEGG PATHWAY	bta05200	1	539	0.917907	0.920761	FGF1	http://www.genome.jp/kegg-bin/show_pathway?bta05200/bta:281160%09red
Olfactory transduction	KEGG PATHWAY	bta04740	1	1161	0.995656	0.995656	PRKG2	http://www.genome.jp/kegg-bin/show_pathway?bta04740/bta:533330%09red
--------------------
Term	Database	ID	Input number	Background number	p-Value	Corrected p-Value	Input	Hyperlink
cytosol	Gene Ontology	GO:0005829	30	2482	8.65767e-07	0.000838062	SNX6|MED27|PUM2|NPHP4|FBXL6|OPLAH|EXOSC4|CHD5|RGS7|UBQLN4|THRA|RNF115|PLAG1|AREL1|DAAM1|PPP2R2C|AMFR|PLEC|OGFOD1|MAN1A1|FGF1|MEX3A|PDE4D|CYC1|MYO6|PARP10|GEMIN5|FER|TBC1D16|FBXL22	http://amigo.geneontology.org/amigo/term/GO:0005829
perinuclear region of cytoplasm	Gene Ontology	GO:0048471	11	411	4.10161e-06	0.00198518	HSF1|TLK2|MYO6|RAP1A|PUM2|AMFR|RAB3C|PLEC|CYHR1|PDE4D|LYN	http://amigo.geneontology.org/amigo/term/GO:0048471
nucleus	Gene Ontology	GO:0005634	31	2955	1.00788e-05	0.00325211	HSF1|USP3|CCDC86|SCRT1|GON4L|NR1D1|NUDT21|RNGTT|CPSF1|HACE1|PRPF19|THRA|SCX|DLX5|DLX6|PLAG1|HMG20A|NUDT5|KIFC2|LYN|FGF1|NEUROD2|MAF1|MYO6|PARP10|FBXL6|MEF2A|KPNA4|PSMB4|PDE4D|FBXL22	http://amigo.geneontology.org/amigo/term/GO:0005634
cytoplasm	Gene Ontology	GO:0005737	29	2867	4.07524e-05	0.00986209	HSF1|USH2A|USP3|RAP1A|PUM2|NR1D1|NUDT21|DACT1|PPP1R1B|OGFOD1|PRPF19|VPS28|AZI2|PDPR|DLX5|AREL1|TONSL|DFFB|HACE1|PLEC|ENDOV|FGF1|MOS|MAF1|PARP10|KPNA4|KANK1|PSMB4|ASAP1	http://amigo.geneontology.org/amigo/term/GO:0005737
cell population proliferation	Gene Ontology	GO:0008283	5	91	8.14431e-05	0.0157674	DLX5|FER|BOP1|OGFOD1|KANK1	http://amigo.geneontology.org/amigo/term/GO:0008283
identical protein binding	Gene Ontology	GO:0042802	13	813	0.000111581	0.0180018	HSF1|TNFSF11|USH2A|PEAK1|PRPF19|DAAM1|TP73|AMFR|SYT11|UBQLN4|NUDT21|HMG20A|PRTG	http://amigo.geneontology.org/amigo/term/GO:0042802
mRNA 3'-UTR AU-rich region binding	Gene Ontology	GO:0035925	3	21	0.000176689	0.0244336	NUDT21|EXOSC4|CPSF1	http://amigo.geneontology.org/amigo/term/GO:0035925
positive regulation of transcription by RNA polymerase II	Gene Ontology	GO:0045944	13	872	0.000219199	0.0265231	NEUROD2|HSF1|TNFSF11|MYO6|TP73|THRA|MEF2A|SCX|DLX5|DLX6|FOXH1|PLAG1|FGF1	http://amigo.geneontology.org/amigo/term/GO:0045944
protein-containing complex binding	Gene Ontology	GO:0044877	5	126	0.000349039	0.0346779	VPS28|LYN|AJAP1|RAP1A|THRA	http://amigo.geneontology.org/amigo/term/GO:0044877
proteasomal protein catabolic process	Gene Ontology	GO:0010498	3	28	0.00038332	0.0346779	PRPF19|NR1D1|PSMB4	http://amigo.geneontology.org/amigo/term/GO:0010498
positive regulation of cell population proliferation	Gene Ontology	GO:0008284	7	286	0.000415276	0.0346779	HSF1|RAB25|CD47|FER|SCX|RAD51B|FGF1	http://amigo.geneontology.org/amigo/term/GO:0008284
negative regulation of microglial cell activation	Gene Ontology	GO:1903979	2	5	0.000429892	0.0346779	NR1D1|SYT11	http://amigo.geneontology.org/amigo/term/GO:1903979
nuclear body	Gene Ontology	GO:0016604	6	226	0.000715322	0.0501806	HACE1|TONSL|CYC1|GEMIN5|SCRT1|NPHP4	http://amigo.geneontology.org/amigo/term/GO:0016604
late endosome	Gene Ontology	GO:0005770	4	84	0.000725753	0.0501806	RASGEF1B|CTSS|RAP1A|LAMTOR2	http://amigo.geneontology.org/amigo/term/GO:0005770
dendritic cell differentiation	Gene Ontology	GO:0097028	2	8	0.000912935	0.0507492	AZI2|LYN	http://amigo.geneontology.org/amigo/term/GO:0097028
anatomical structure formation involved in morphogenesis	Gene Ontology	GO:0048646	2	8	0.000912935	0.0507492	DLX5|DLX6	http://amigo.geneontology.org/amigo/term/GO:0048646
ubiquitin-ubiquitin ligase activity	Gene Ontology	GO:0034450	2	8	0.000912935	0.0507492	PRPF19|AMFR	http://amigo.geneontology.org/amigo/term/GO:0034450
positive regulation of epithelial cell proliferation	Gene Ontology	GO:0050679	3	39	0.000943684	0.0507492	DLX5|DLX6|FGF1	http://amigo.geneontology.org/amigo/term/GO:0050679
E-box binding	Gene Ontology	GO:0070888	3	44	0.00131089	0.0613509	NEUROD2|NR1D1|SCX	http://amigo.geneontology.org/amigo/term/GO:0070888
positive regulation of T cell activation	Gene Ontology	GO:0050870	2	10	0.00133096	0.0613509	TNFSF11|CD47	http://amigo.geneontology.org/amigo/term/GO:0050870
myosin V binding	Gene Ontology	GO:0031489	2	11	0.00156824	0.0690027	RAB3C|RAB25	http://amigo.geneontology.org/amigo/term/GO:0031489
protein K48-linked ubiquitination	Gene Ontology	GO:0070936	3	49	0.00175716	0.0735737	RNF115|AMFR|HACE1	http://amigo.geneontology.org/amigo/term/GO:0070936
embryo development	Gene Ontology	GO:0009790	2	12	0.00182414	0.0735737	DLX5|DLX6	http://amigo.geneontology.org/amigo/term/GO:0009790
DNA replication factor A complex	Gene Ontology	GO:0005662	2	13	0.00209848	0.080681	PRPF19|TONSL	http://amigo.geneontology.org/amigo/term/GO:0005662
mRNA cleavage and polyadenylation specificity factor complex	Gene Ontology	GO:0005847	2	14	0.00239109	0.080681	NUDT21|CPSF1	http://amigo.geneontology.org/amigo/term/GO:0005847
stress granule assembly	Gene Ontology	GO:0034063	2	14	0.00239109	0.080681	PUM2|OGFOD1	http://amigo.geneontology.org/amigo/term/GO:0034063
posttranscriptional regulation of gene expression	Gene Ontology	GO:0010608	2	14	0.00239109	0.080681	PUM2|NUDT21	http://amigo.geneontology.org/amigo/term/GO:0010608
ubiquitin-dependent protein catabolic process	Gene Ontology	GO:0006511	5	197	0.0024171	0.080681	AMFR|HACE1|USP3|AREL1|UBQLN4	http://amigo.geneontology.org/amigo/term/GO:0006511
cellular response to calcium ion	Gene Ontology	GO:0071277	3	57	0.0026494	0.0843658	NEUROD2|MEF2A|SYT11	http://amigo.geneontology.org/amigo/term/GO:0071277
ubiquitin-dependent protein catabolic process via the multivesicular body sorting pathway	Gene Ontology	GO:0043162	2	15	0.0027018	0.0843658	VPS28|RNF115	http://amigo.geneontology.org/amigo/term/GO:0043162
sequence-specific DNA binding	Gene Ontology	GO:0043565	5	208	0.00303598	0.089292	HSF1|DLX5|DLX6|FOXH1|SCX	http://amigo.geneontology.org/amigo/term/GO:0043565
ubiquitin protein ligase activity	Gene Ontology	GO:0061630	5	211	0.00322294	0.091759	PRPF19|RNF115|AMFR|HACE1|AREL1	http://amigo.geneontology.org/amigo/term/GO:0061630
cell differentiation	Gene Ontology	GO:0030154	6	312	0.00351432	0.0964118	THRA|SCX|DLX5|LYN|DLX6|FGF1	http://amigo.geneontology.org/amigo/term/GO:0030154
bHLH transcription factor binding	Gene Ontology	GO:0043425	2	19	0.00412227	0.104197	FOXH1|SCX	http://amigo.geneontology.org/amigo/term/GO:0043425
GTP binding	Gene Ontology	GO:0005525	6	326	0.00433108	0.104197	RAB27A|RAB25|GNAO1|RAP1A|RAB3C|RNGTT	http://amigo.geneontology.org/amigo/term/GO:0005525
beta-catenin binding	Gene Ontology	GO:0008013	3	69	0.00443726	0.104197	DACT1|AJAP1|KANK1	http://amigo.geneontology.org/amigo/term/GO:0008013
cellular response to gamma radiation	Gene Ontology	GO:0071480	2	20	0.00452096	0.104197	HSF1|TLK2	http://amigo.geneontology.org/amigo/term/GO:0071480
voltage-gated calcium channel complex	Gene Ontology	GO:0005891	2	20	0.00452096	0.104197	CACNA1C|PDE4D	http://amigo.geneontology.org/amigo/term/GO:0005891
phagocytic cup	Gene Ontology	GO:0001891	2	20	0.00452096	0.104197	RAB11FIP2|SYT11	http://amigo.geneontology.org/amigo/term/GO:0001891
ion channel binding	Gene Ontology	GO:0044325	3	72	0.00497423	0.111978	GRINA|PDE4D|LYN	http://amigo.geneontology.org/amigo/term/GO:0044325
Rho GTPase binding	Gene Ontology	GO:0017048	2	22	0.00536948	0.118129	DAAM1|DAAM2	http://amigo.geneontology.org/amigo/term/GO:0017048
negative regulation of insulin receptor signaling pathway	Gene Ontology	GO:0046627	2	23	0.005819	0.125173	KANK1|NCOA5	http://amigo.geneontology.org/amigo/term/GO:0046627
entrainment of circadian clock by photoperiod	Gene Ontology	GO:0043153	2	24	0.00628512	0.129447	FBXL22|FBXL6	http://amigo.geneontology.org/amigo/term/GO:0043153
mRNA polyadenylation	Gene Ontology	GO:0006378	2	24	0.00628512	0.129447	NUDT21|CPSF1	http://amigo.geneontology.org/amigo/term/GO:0006378
regulation of cell cycle	Gene Ontology	GO:0051726	3	81	0.00681319	0.137399	BOP1|FBXL22|FBXL6	http://amigo.geneontology.org/amigo/term/GO:0051726
endochondral ossification	Gene Ontology	GO:0001958	2	26	0.0072666	0.143552	DLX5|SCX	http://amigo.geneontology.org/amigo/term/GO:0001958
positive regulation of canonical Wnt signaling pathway	Gene Ontology	GO:0090263	3	84	0.00750433	0.144858	DLX5|DACT1|KANK1	http://amigo.geneontology.org/amigo/term/GO:0090263
face morphogenesis	Gene Ontology	GO:0060325	2	27	0.00778163	0.144858	DLX5|SCX	http://amigo.geneontology.org/amigo/term/GO:0060325
endosome	Gene Ontology	GO:0005768	4	168	0.00816685	0.149161	RAB11FIP2|RAB3C|RAB25|SNX6	http://amigo.geneontology.org/amigo/term/GO:0005768
histone deacetylase binding	Gene Ontology	GO:0042826	3	89	0.00874538	0.153386	NUDT21|DACT1|MEF2A	http://amigo.geneontology.org/amigo/term/GO:0042826
cellular response to heat	Gene Ontology	GO:0034605	2	29	0.00885949	0.153386	HSF1|FGF1	http://amigo.geneontology.org/amigo/term/GO:0034605
DNA-binding transcription activator activity, RNA polymerase II-specific	Gene Ontology	GO:0001228	6	385	0.00937005	0.153386	NEUROD2|TP73|SCX|DLX5|FOXH1|PLAG1	http://amigo.geneontology.org/amigo/term/GO:0001228
embryonic limb morphogenesis	Gene Ontology	GO:0030326	2	31	0.0100001	0.153386	DLX5|DLX6	http://amigo.geneontology.org/amigo/term/GO:0030326
DNA binding	Gene Ontology	GO:0003677	7	517	0.0105775	0.153386	HSF1|DFFB|ENDOV|SCRT1|SCX|PLAG1|HMG20A	http://amigo.geneontology.org/amigo/term/GO:0003677
protein K63-linked ubiquitination	Gene Ontology	GO:0070534	2	32	0.0105935	0.153386	PRPF19|RNF115	http://amigo.geneontology.org/amigo/term/GO:0070534
non-membrane spanning protein tyrosine kinase activity	Gene Ontology	GO:0004715	2	32	0.0105935	0.153386	LYN|PEAK1	http://amigo.geneontology.org/amigo/term/GO:0004715
nuclear chromatin	Gene Ontology	GO:0000790	5	285	0.0109035	0.153386	DLX5|FOXH1|USP3|FER|DFFB	http://amigo.geneontology.org/amigo/term/GO:0000790
cell junction	Gene Ontology	GO:0030054	3	97	0.0109677	0.153386	FER|TP73|RAP1A	http://amigo.geneontology.org/amigo/term/GO:0030054
G2/M transition of mitotic cell cycle	Gene Ontology	GO:0000086	2	33	0.0112022	0.153386	FBXL22|FBXL6	http://amigo.geneontology.org/amigo/term/GO:0000086
negative regulation of gene expression	Gene Ontology	GO:0010629	3	99	0.0115695	0.153386	ITGB8|PLAG1|PARP10	http://amigo.geneontology.org/amigo/term/GO:0010629
negative regulation of nucleic acid-templated transcription	Gene Ontology	GO:1903507	2	34	0.0118259	0.153386	NEUROD2|PARP10	http://amigo.geneontology.org/amigo/term/GO:1903507
erythrocyte differentiation	Gene Ontology	GO:0030218	2	35	0.0124645	0.153386	LYN|THRA	http://amigo.geneontology.org/amigo/term/GO:0030218
photoreceptor cell maintenance	Gene Ontology	GO:0045494	2	35	0.0124645	0.153386	USH2A|NPHP4	http://amigo.geneontology.org/amigo/term/GO:0045494
sensory perception of sound	Gene Ontology	GO:0007605	3	102	0.0125074	0.153386	GRM7|MYO6|USH2A	http://amigo.geneontology.org/amigo/term/GO:0007605
signaling receptor activity	Gene Ontology	GO:0038023	3	102	0.0125074	0.153386	ITGB8|AMFR|PRTG	http://amigo.geneontology.org/amigo/term/GO:0038023
cartilage development	Gene Ontology	GO:0051216	2	36	0.013118	0.153386	ITGB8|BMP3	http://amigo.geneontology.org/amigo/term/GO:0051216
heparin binding	Gene Ontology	GO:0008201	3	104	0.0131562	0.153386	LTBP2|FGF1|RPL22	http://amigo.geneontology.org/amigo/term/GO:0008201
neuron projection	Gene Ontology	GO:0043005	4	202	0.0150211	0.153386	GLRA3|PTGDR2|SYT11|RAP1A	http://amigo.geneontology.org/amigo/term/GO:0043005
SCF-dependent proteasomal ubiquitin-dependent protein catabolic process	Gene Ontology	GO:0031146	2	39	0.0151655	0.153386	FBXL22|FBXL6	http://amigo.geneontology.org/amigo/term/GO:0031146
protein ubiquitination	Gene Ontology	GO:0016567	5	311	0.0153058	0.153386	NEUROD2|AMFR|HACE1|AREL1|FBXL22	http://amigo.geneontology.org/amigo/term/GO:0016567
actin cytoskeleton organization	Gene Ontology	GO:0030036	3	114	0.016685	0.153386	DAAM1|DAAM2|KANK1	http://amigo.geneontology.org/amigo/term/GO:0030036
wound healing	Gene Ontology	GO:0042060	2	42	0.0173408	0.153386	PLEC|FGF1	http://amigo.geneontology.org/amigo/term/GO:0042060
inner ear morphogenesis	Gene Ontology	GO:0042472	2	42	0.0173408	0.153386	DLX5|DLX6	http://amigo.geneontology.org/amigo/term/GO:0042472
phosphatidylserine binding	Gene Ontology	GO:0001786	2	42	0.0173408	0.153386	SYT11|ASAP1	http://amigo.geneontology.org/amigo/term/GO:0001786
extrinsic component of cytoplasmic side of plasma membrane	Gene Ontology	GO:0031234	2	43	0.0180936	0.153386	LYN|MYZAP	http://amigo.geneontology.org/amigo/term/GO:0031234
cellular protein localization	Gene Ontology	GO:0034613	2	44	0.0188601	0.153386	PRPF19|LAMTOR2	http://amigo.geneontology.org/amigo/term/GO:0034613
collagen binding	Gene Ontology	GO:0005518	2	45	0.01964	0.153386	CTSS|USH2A	http://amigo.geneontology.org/amigo/term/GO:0005518
microtubule motor activity	Gene Ontology	GO:0003777	2	45	0.01964	0.153386	DNAH3|KIFC2	http://amigo.geneontology.org/amigo/term/GO:0003777
ossification	Gene Ontology	GO:0001503	2	45	0.01964	0.153386	TNFSF11|THRA	http://amigo.geneontology.org/amigo/term/GO:0001503
positive regulation of GTPase activity	Gene Ontology	GO:0043547	4	222	0.0203601	0.153386	RAB11FIP2|RGS7|ASAP1|RAP1A	http://amigo.geneontology.org/amigo/term/GO:0043547
DNA repair	Gene Ontology	GO:0006281	3	124	0.0206936	0.153386	HSF1|USP3|ENDOV	http://amigo.geneontology.org/amigo/term/GO:0006281
epithelial cell differentiation	Gene Ontology	GO:0030855	2	47	0.0212399	0.153386	DLX5|DLX6	http://amigo.geneontology.org/amigo/term/GO:0030855
flagellated sperm motility	Gene Ontology	GO:0030317	2	49	0.0228921	0.153386	NPHP4|CCDC40	http://amigo.geneontology.org/amigo/term/GO:0030317
substrate adhesion-dependent cell spreading	Gene Ontology	GO:0034446	2	49	0.0228921	0.153386	FER|PEAK1	http://amigo.geneontology.org/amigo/term/GO:0034446
proteasome-mediated ubiquitin-dependent protein catabolic process	Gene Ontology	GO:0043161	3	130	0.0233306	0.153386	HACE1|PSMB4|AREL1	http://amigo.geneontology.org/amigo/term/GO:0043161
mRNA 3'-UTR binding	Gene Ontology	GO:0003730	2	51	0.0245956	0.153386	PUM2|GEMIN5	http://amigo.geneontology.org/amigo/term/GO:0003730
positive regulation of protein catabolic process	Gene Ontology	GO:0045732	2	51	0.0245956	0.153386	HACE1|AREL1	http://amigo.geneontology.org/amigo/term/GO:0045732
intermediate filament	Gene Ontology	GO:0005882	2	52	0.0254662	0.153386	PLEC|TLK2	http://amigo.geneontology.org/amigo/term/GO:0005882
positive regulation of neuron projection development	Gene Ontology	GO:0010976	2	53	0.0263493	0.153386	LYN|RAP1A	http://amigo.geneontology.org/amigo/term/GO:0010976
SCF ubiquitin ligase complex	Gene Ontology	GO:0019005	2	53	0.0263493	0.153386	FBXL22|FBXL6	http://amigo.geneontology.org/amigo/term/GO:0019005
negative regulation of transcription by RNA polymerase II	Gene Ontology	GO:0000122	7	625	0.0265133	0.153386	HSF1|THRA|MEF2A|SCRT1|FOXH1|DACT1|HMG20A	http://amigo.geneontology.org/amigo/term/GO:0000122
nuclear stress granule	Gene Ontology	GO:0097165	1	5	0.0271449	0.153386	HSF1	http://amigo.geneontology.org/amigo/term/GO:0097165
regulation of type B pancreatic cell proliferation	Gene Ontology	GO:0061469	1	5	0.0271449	0.153386	NR1D1	http://amigo.geneontology.org/amigo/term/GO:0061469
regulation of cilium beat frequency	Gene Ontology	GO:0003356	1	5	0.0271449	0.153386	CCDC40	http://amigo.geneontology.org/amigo/term/GO:0003356
supramolecular fiber organization	Gene Ontology	GO:0097435	1	5	0.0271449	0.153386	LTBP2	http://amigo.geneontology.org/amigo/term/GO:0097435
regulation of chromosome segregation	Gene Ontology	GO:0051983	1	5	0.0271449	0.153386	PUM2	http://amigo.geneontology.org/amigo/term/GO:0051983
GPI-anchor transamidase complex	Gene Ontology	GO:0042765	1	5	0.0271449	0.153386	GPAA1	http://amigo.geneontology.org/amigo/term/GO:0042765
production of miRNAs involved in gene silencing by miRNA	Gene Ontology	GO:0035196	1	5	0.0271449	0.153386	PUM2	http://amigo.geneontology.org/amigo/term/GO:0035196
regulation of B cell receptor signaling pathway	Gene Ontology	GO:0050855	1	5	0.0271449	0.153386	LYN	http://amigo.geneontology.org/amigo/term/GO:0050855
attachment of GPI anchor to protein	Gene Ontology	GO:0016255	1	5	0.0271449	0.153386	GPAA1	http://amigo.geneontology.org/amigo/term/GO:0016255
periciliary membrane compartment	Gene Ontology	GO:1990075	1	5	0.0271449	0.153386	USH2A	http://amigo.geneontology.org/amigo/term/GO:1990075
negative regulation of toll-like receptor 4 signaling pathway	Gene Ontology	GO:0034144	1	5	0.0271449	0.153386	LYN	http://amigo.geneontology.org/amigo/term/GO:0034144
zinc ion import across plasma membrane	Gene Ontology	GO:0071578	1	5	0.0271449	0.153386	SLC39A4	http://amigo.geneontology.org/amigo/term/GO:0071578
hemidesmosome assembly	Gene Ontology	GO:0031581	1	5	0.0271449	0.153386	PLEC	http://amigo.geneontology.org/amigo/term/GO:0031581
tooth eruption	Gene Ontology	GO:0044691	1	5	0.0271449	0.153386	TNFSF11	http://amigo.geneontology.org/amigo/term/GO:0044691
alpha-beta T cell differentiation	Gene Ontology	GO:0046632	1	5	0.0271449	0.153386	RPL22	http://amigo.geneontology.org/amigo/term/GO:0046632
contractile fiber	Gene Ontology	GO:0043292	1	5	0.0271449	0.153386	PLEC	http://amigo.geneontology.org/amigo/term/GO:0043292
regulation of cardiac muscle cell contraction	Gene Ontology	GO:0086004	1	5	0.0271449	0.153386	PDE4D	http://amigo.geneontology.org/amigo/term/GO:0086004
ribosome assembly	Gene Ontology	GO:0042255	1	5	0.0271449	0.153386	MRPL22	http://amigo.geneontology.org/amigo/term/GO:0042255
cellular response to epinephrine stimulus	Gene Ontology	GO:0071872	1	5	0.0271449	0.153386	PDE4D	http://amigo.geneontology.org/amigo/term/GO:0071872
negative regulation of synaptic vesicle exocytosis	Gene Ontology	GO:2000301	1	5	0.0271449	0.153386	RAP1A	http://amigo.geneontology.org/amigo/term/GO:2000301
blastocyst growth	Gene Ontology	GO:0001832	1	5	0.0271449	0.153386	RAD51B	http://amigo.geneontology.org/amigo/term/GO:0001832
extracellularly glycine-gated chloride channel activity	Gene Ontology	GO:0016934	1	5	0.0271449	0.153386	GLRA3	http://amigo.geneontology.org/amigo/term/GO:0016934
mRNA alternative polyadenylation	Gene Ontology	GO:0110104	1	5	0.0271449	0.153386	NUDT21	http://amigo.geneontology.org/amigo/term/GO:0110104
maintenance of animal organ identity	Gene Ontology	GO:0048496	1	5	0.0271449	0.153386	USH2A	http://amigo.geneontology.org/amigo/term/GO:0048496
mRNA cleavage factor complex	Gene Ontology	GO:0005849	1	5	0.0271449	0.153386	NUDT21	http://amigo.geneontology.org/amigo/term/GO:0005849
type I pneumocyte differentiation	Gene Ontology	GO:0060509	1	5	0.0271449	0.153386	THRA	http://amigo.geneontology.org/amigo/term/GO:0060509
elastic fiber	Gene Ontology	GO:0071953	1	5	0.0271449	0.153386	LTBP2	http://amigo.geneontology.org/amigo/term/GO:0071953
Sertoli cell differentiation	Gene Ontology	GO:0060008	1	5	0.0271449	0.153386	SCX	http://amigo.geneontology.org/amigo/term/GO:0060008
antigen processing and presentation of exogenous peptide antigen via MHC class II	Gene Ontology	GO:0019886	1	5	0.0271449	0.153386	CTSS	http://amigo.geneontology.org/amigo/term/GO:0019886
deoxyribonuclease activity	Gene Ontology	GO:0004536	1	5	0.0271449	0.153386	DFFB	http://amigo.geneontology.org/amigo/term/GO:0004536
regulation of transcription involved in cell fate commitment	Gene Ontology	GO:0060850	1	5	0.0271449	0.153386	CHD5	http://amigo.geneontology.org/amigo/term/GO:0060850
cellular response to sodium arsenite	Gene Ontology	GO:1903936	1	5	0.0271449	0.153386	HSF1	http://amigo.geneontology.org/amigo/term/GO:1903936
spanning component of plasma membrane	Gene Ontology	GO:0044214	1	5	0.0271449	0.153386	AJAP1	http://amigo.geneontology.org/amigo/term/GO:0044214
histone H3-K27 trimethylation	Gene Ontology	GO:0098532	1	5	0.0271449	0.153386	CHD5	http://amigo.geneontology.org/amigo/term/GO:0098532
ruffle membrane	Gene Ontology	GO:0032587	2	54	0.0272446	0.153386	MYO6|KANK1	http://amigo.geneontology.org/amigo/term/GO:0032587
cytoplasmic stress granule	Gene Ontology	GO:0010494	2	54	0.0272446	0.153386	PUM2|OGFOD1	http://amigo.geneontology.org/amigo/term/GO:0010494
chromatin DNA binding	Gene Ontology	GO:0031490	2	54	0.0272446	0.153386	HSF1|THRA	http://amigo.geneontology.org/amigo/term/GO:0031490
lung development	Gene Ontology	GO:0030324	2	54	0.0272446	0.153386	FGF1|CCDC40	http://amigo.geneontology.org/amigo/term/GO:0030324
regulation of protein stability	Gene Ontology	GO:0031647	2	56	0.0290717	0.153386	USP3|DACT1	http://amigo.geneontology.org/amigo/term/GO:0031647
positive regulation of protein binding	Gene Ontology	GO:0032092	2	56	0.0290717	0.153386	AMFR|DACT1	http://amigo.geneontology.org/amigo/term/GO:0032092
osteoblast differentiation	Gene Ontology	GO:0001649	2	56	0.0290717	0.153386	DLX5|BMP3	http://amigo.geneontology.org/amigo/term/GO:0001649
roof of mouth development	Gene Ontology	GO:0060021	2	56	0.0290717	0.153386	DLX5|DLX6	http://amigo.geneontology.org/amigo/term/GO:0060021
cellular response to DNA damage stimulus	Gene Ontology	GO:0006974	3	143	0.0296403	0.153386	LYN|UBQLN4|TLK2	http://amigo.geneontology.org/amigo/term/GO:0006974
BMP signaling pathway	Gene Ontology	GO:0030509	2	57	0.0300031	0.153386	DLX5|SCX	http://amigo.geneontology.org/amigo/term/GO:0030509
calcium-mediated signaling	Gene Ontology	GO:0019722	2	57	0.0300031	0.153386	TNFSF11|PTGDR2	http://amigo.geneontology.org/amigo/term/GO:0019722
positive regulation of cell migration	Gene Ontology	GO:0030335	3	144	0.0301594	0.153386	LYN|FER|FGF1	http://amigo.geneontology.org/amigo/term/GO:0030335
centrosome	Gene Ontology	GO:0005813	5	375	0.0308123	0.153386	SPATC1|HSF1|PLAG1|PDE4D|NPHP4	http://amigo.geneontology.org/amigo/term/GO:0005813
protein autoubiquitination	Gene Ontology	GO:0051865	2	58	0.0309464	0.153386	AMFR|RNF115	http://amigo.geneontology.org/amigo/term/GO:0051865
MAPK cascade	Gene Ontology	GO:0000165	2	58	0.0309464	0.153386	HSF1|MEF2A	http://amigo.geneontology.org/amigo/term/GO:0000165
synapse	Gene Ontology	GO:0045202	4	254	0.0310766	0.153386	GLRA3|SYT11|GRM7|RPS20	http://amigo.geneontology.org/amigo/term/GO:0045202
GTPase activity	Gene Ontology	GO:0003924	4	255	0.031456	0.153386	RAB27A|RAB3C|RAB25|RAP1A	http://amigo.geneontology.org/amigo/term/GO:0003924
Ragulator complex	Gene Ontology	GO:0071986	1	6	0.0315974	0.153386	LAMTOR2	http://amigo.geneontology.org/amigo/term/GO:0071986
thyroid hormone binding	Gene Ontology	GO:0070324	1	6	0.0315974	0.153386	THRA	http://amigo.geneontology.org/amigo/term/GO:0070324
positive regulation of transcription from RNA polymerase II promoter involved in cellular response to chemical stimulus	Gene Ontology	GO:1901522	1	6	0.0315974	0.153386	DLX5	http://amigo.geneontology.org/amigo/term/GO:1901522
positive regulation of interleukin-5 production	Gene Ontology	GO:0032754	1	6	0.0315974	0.153386	PDE4D	http://amigo.geneontology.org/amigo/term/GO:0032754
regulation of ryanodine-sensitive calcium-release channel activity	Gene Ontology	GO:0060314	1	6	0.0315974	0.153386	PDE4D	http://amigo.geneontology.org/amigo/term/GO:0060314
mitochondrial genome maintenance	Gene Ontology	GO:0000002	1	6	0.0315974	0.153386	MEF2A	http://amigo.geneontology.org/amigo/term/GO:0000002
positive regulation of gastrulation	Gene Ontology	GO:2000543	1	6	0.0315974	0.153386	SCX	http://amigo.geneontology.org/amigo/term/GO:2000543
regulation of tumor necrosis factor production	Gene Ontology	GO:0032680	1	6	0.0315974	0.153386	CD47	http://amigo.geneontology.org/amigo/term/GO:0032680
positive regulation of RIG-I signaling pathway	Gene Ontology	GO:1900246	1	6	0.0315974	0.153386	PUM2	http://amigo.geneontology.org/amigo/term/GO:1900246
very-low-density lipoprotein particle assembly	Gene Ontology	GO:0034379	1	6	0.0315974	0.153386	DGAT1	http://amigo.geneontology.org/amigo/term/GO:0034379
regulation of translational termination	Gene Ontology	GO:0006449	1	6	0.0315974	0.153386	OGFOD1	http://amigo.geneontology.org/amigo/term/GO:0006449
cellular response to electrical stimulus	Gene Ontology	GO:0071257	1	6	0.0315974	0.153386	NEUROD2	http://amigo.geneontology.org/amigo/term/GO:0071257
positive regulation of synaptic plasticity	Gene Ontology	GO:0031915	1	6	0.0315974	0.153386	NEUROD2	http://amigo.geneontology.org/amigo/term/GO:0031915
regulation of mast cell degranulation	Gene Ontology	GO:0043304	1	6	0.0315974	0.153386	LYN	http://amigo.geneontology.org/amigo/term/GO:0043304
2-acylglycerol O-acyltransferase activity	Gene Ontology	GO:0003846	1	6	0.0315974	0.153386	DGAT1	http://amigo.geneontology.org/amigo/term/GO:0003846
regulation of cell junction assembly	Gene Ontology	GO:1901888	1	6	0.0315974	0.153386	RAP1A	http://amigo.geneontology.org/amigo/term/GO:1901888
negative regulation of double-strand break repair via nonhomologous end joining	Gene Ontology	GO:2001033	1	6	0.0315974	0.153386	HSF1	http://amigo.geneontology.org/amigo/term/GO:2001033
7-methylguanosine mRNA capping	Gene Ontology	GO:0006370	1	6	0.0315974	0.153386	RNGTT	http://amigo.geneontology.org/amigo/term/GO:0006370
paraspeckles	Gene Ontology	GO:0042382	1	6	0.0315974	0.153386	NUDT21	http://amigo.geneontology.org/amigo/term/GO:0042382
mitochondrion distribution	Gene Ontology	GO:0048311	1	6	0.0315974	0.153386	MEF2A	http://amigo.geneontology.org/amigo/term/GO:0048311
negative regulation of inflammatory response to antigenic stimulus	Gene Ontology	GO:0002862	1	6	0.0315974	0.153386	PSMB4	http://amigo.geneontology.org/amigo/term/GO:0002862
prostate gland growth	Gene Ontology	GO:0060736	1	6	0.0315974	0.153386	PLAG1	http://amigo.geneontology.org/amigo/term/GO:0060736
negative regulation of ruffle assembly	Gene Ontology	GO:1900028	1	6	0.0315974	0.153386	KANK1	http://amigo.geneontology.org/amigo/term/GO:1900028
negative regulation of cardiac muscle cell proliferation	Gene Ontology	GO:0060044	1	6	0.0315974	0.153386	TP73	http://amigo.geneontology.org/amigo/term/GO:0060044
determination of digestive tract left/right asymmetry	Gene Ontology	GO:0071907	1	6	0.0315974	0.153386	CCDC40	http://amigo.geneontology.org/amigo/term/GO:0071907
gland morphogenesis	Gene Ontology	GO:0022612	1	6	0.0315974	0.153386	PLAG1	http://amigo.geneontology.org/amigo/term/GO:0022612
positive regulation of glial cell proliferation	Gene Ontology	GO:0060252	1	6	0.0315974	0.153386	PLAG1	http://amigo.geneontology.org/amigo/term/GO:0060252
U4 snRNA binding	Gene Ontology	GO:0030621	1	6	0.0315974	0.153386	GEMIN5	http://amigo.geneontology.org/amigo/term/GO:0030621
large ribosomal subunit	Gene Ontology	GO:0015934	1	6	0.0315974	0.153386	MRPL22	http://amigo.geneontology.org/amigo/term/GO:0015934
dorsal spinal cord development	Gene Ontology	GO:0021516	1	6	0.0315974	0.153386	DAAM2	http://amigo.geneontology.org/amigo/term/GO:0021516
ADP-ribose diphosphatase activity	Gene Ontology	GO:0047631	1	6	0.0315974	0.153386	NUDT5	http://amigo.geneontology.org/amigo/term/GO:0047631
synaptic transmission, glycinergic	Gene Ontology	GO:0060012	1	6	0.0315974	0.153386	GLRA3	http://amigo.geneontology.org/amigo/term/GO:0060012
nuclear membrane	Gene Ontology	GO:0031965	3	147	0.0317453	0.153386	PUM2|KPNA4|MYO6	http://amigo.geneontology.org/amigo/term/GO:0031965
transcription corepressor activity	Gene Ontology	GO:0003714	3	148	0.0322835	0.153386	NEUROD2|GON4L|PARP10	http://amigo.geneontology.org/amigo/term/GO:0003714
DNA-binding transcription factor activity	Gene Ontology	GO:0003700	4	258	0.0326102	0.153386	DLX5|DLX6|PLAG1|SCRT1	http://amigo.geneontology.org/amigo/term/GO:0003700
microtubule-based movement	Gene Ontology	GO:0007018	2	61	0.0338455	0.153386	DNAH3|KIFC2	http://amigo.geneontology.org/amigo/term/GO:0007018
late endosome membrane	Gene Ontology	GO:0031902	2	61	0.0338455	0.153386	STARD3|VPS28	http://amigo.geneontology.org/amigo/term/GO:0031902
ATP binding	Gene Ontology	GO:0005524	11	1275	0.0341919	0.153386	DNAH3|CHD5|PEAK1|MOS|TLK2|MYO6|RAD51B|FER|PRKG2|LYN|OPLAH	http://amigo.geneontology.org/amigo/term/GO:0005524
negative regulation of epidermal growth factor receptor signaling pathway	Gene Ontology	GO:0042059	1	7	0.0360297	0.153386	RNF115	http://amigo.geneontology.org/amigo/term/GO:0042059
negative regulation of protein sumoylation	Gene Ontology	GO:0033234	1	7	0.0360297	0.153386	HMG20A	http://amigo.geneontology.org/amigo/term/GO:0033234
meiotic spindle organization	Gene Ontology	GO:0000212	1	7	0.0360297	0.153386	MOS	http://amigo.geneontology.org/amigo/term/GO:0000212
positive regulation of stem cell differentiation	Gene Ontology	GO:2000738	1	7	0.0360297	0.153386	NUDT21	http://amigo.geneontology.org/amigo/term/GO:2000738
negative regulation of intracellular estrogen receptor signaling pathway	Gene Ontology	GO:0033147	1	7	0.0360297	0.153386	FOXH1	http://amigo.geneontology.org/amigo/term/GO:0033147
beta-catenin destruction complex	Gene Ontology	GO:0030877	1	7	0.0360297	0.153386	DACT1	http://amigo.geneontology.org/amigo/term/GO:0030877
positive regulation of aspartic-type endopeptidase activity involved in amyloid precursor protein catabolic process	Gene Ontology	GO:1902961	1	7	0.0360297	0.153386	LYN	http://amigo.geneontology.org/amigo/term/GO:1902961
regulation of chondrocyte differentiation	Gene Ontology	GO:0032330	1	7	0.0360297	0.153386	GLG1	http://amigo.geneontology.org/amigo/term/GO:0032330
insulin secretion involved in cellular response to glucose stimulus	Gene Ontology	GO:0035773	1	7	0.0360297	0.153386	RAB11FIP2	http://amigo.geneontology.org/amigo/term/GO:0035773
nuclear mRNA surveillance	Gene Ontology	GO:0071028	1	7	0.0360297	0.153386	EXOSC4	http://amigo.geneontology.org/amigo/term/GO:0071028
MDM2/MDM4 family protein binding	Gene Ontology	GO:0097371	1	7	0.0360297	0.153386	TP73	http://amigo.geneontology.org/amigo/term/GO:0097371
chaperone complex	Gene Ontology	GO:0101031	1	7	0.0360297	0.153386	HSF1	http://amigo.geneontology.org/amigo/term/GO:0101031
RNA polymerase II, holoenzyme	Gene Ontology	GO:0016591	1	7	0.0360297	0.153386	MYO6	http://amigo.geneontology.org/amigo/term/GO:0016591
regulation of platelet aggregation	Gene Ontology	GO:0090330	1	7	0.0360297	0.153386	LYN	http://amigo.geneontology.org/amigo/term/GO:0090330
protein poly-ADP-ribosylation	Gene Ontology	GO:0070212	1	7	0.0360297	0.153386	PARP10	http://amigo.geneontology.org/amigo/term/GO:0070212
polyadenylation-dependent snoRNA 3'-end processing	Gene Ontology	GO:0071051	1	7	0.0360297	0.153386	EXOSC4	http://amigo.geneontology.org/amigo/term/GO:0071051
regulation of signal transduction by p53 class mediator	Gene Ontology	GO:1901796	1	7	0.0360297	0.153386	BOP1	http://amigo.geneontology.org/amigo/term/GO:1901796
long-chain fatty-acyl-CoA metabolic process	Gene Ontology	GO:0035336	1	7	0.0360297	0.153386	DGAT1	http://amigo.geneontology.org/amigo/term/GO:0035336
regulation of neurotransmitter receptor localization to postsynaptic specialization membrane	Gene Ontology	GO:0098696	1	7	0.0360297	0.153386	RAP1A	http://amigo.geneontology.org/amigo/term/GO:0098696
tyrosine phosphorylation of STAT protein	Gene Ontology	GO:0007260	1	7	0.0360297	0.153386	FER	http://amigo.geneontology.org/amigo/term/GO:0007260
U4 snRNA 3'-end processing	Gene Ontology	GO:0034475	1	7	0.0360297	0.153386	EXOSC4	http://amigo.geneontology.org/amigo/term/GO:0034475
sensory perception of light stimulus	Gene Ontology	GO:0050953	1	7	0.0360297	0.153386	USH2A	http://amigo.geneontology.org/amigo/term/GO:0050953
regulation of lamellipodium assembly	Gene Ontology	GO:0010591	1	7	0.0360297	0.153386	FER	http://amigo.geneontology.org/amigo/term/GO:0010591
negative regulation of cAMP-mediated signaling	Gene Ontology	GO:0043951	1	7	0.0360297	0.153386	PDE4D	http://amigo.geneontology.org/amigo/term/GO:0043951
negative regulation of protein processing	Gene Ontology	GO:0010955	1	7	0.0360297	0.153386	GLG1	http://amigo.geneontology.org/amigo/term/GO:0010955
adenylate cyclase-inhibiting G protein-coupled glutamate receptor signaling pathway	Gene Ontology	GO:0007196	1	7	0.0360297	0.153386	GRM7	http://amigo.geneontology.org/amigo/term/GO:0007196
intracellular signal transduction	Gene Ontology	GO:0035556	4	267	0.0362209	0.153386	LYN|PPP1R1B|RGS7|MYZAP	http://amigo.geneontology.org/amigo/term/GO:0035556
structural constituent of ribosome	Gene Ontology	GO:0003735	3	156	0.0367604	0.153386	MRPL22|RPS20|RPL22	http://amigo.geneontology.org/amigo/term/GO:0003735
cell-matrix adhesion	Gene Ontology	GO:0007160	2	64	0.0368462	0.153386	ITGB8|NID2	http://amigo.geneontology.org/amigo/term/GO:0007160
PML body	Gene Ontology	GO:0016605	2	64	0.0368462	0.153386	HSF1|MORC3	http://amigo.geneontology.org/amigo/term/GO:0016605
actin binding	Gene Ontology	GO:0003779	3	158	0.0379269	0.153386	DAAM1|DAAM2|PLEC	http://amigo.geneontology.org/amigo/term/GO:0003779
activation of MAPK activity	Gene Ontology	GO:0000187	2	66	0.0389014	0.153386	MOS|FGF1	http://amigo.geneontology.org/amigo/term/GO:0000187
interleukin-6-mediated signaling pathway	Gene Ontology	GO:0070102	1	8	0.0404418	0.153386	FER	http://amigo.geneontology.org/amigo/term/GO:0070102
positive regulation of vasculogenesis	Gene Ontology	GO:2001214	1	8	0.0404418	0.153386	RAP1A	http://amigo.geneontology.org/amigo/term/GO:2001214
regulation of release of sequestered calcium ion into cytosol by sarcoplasmic reticulum	Gene Ontology	GO:0010880	1	8	0.0404418	0.153386	PDE4D	http://amigo.geneontology.org/amigo/term/GO:0010880
I band	Gene Ontology	GO:0031674	1	8	0.0404418	0.153386	MYZAP	http://amigo.geneontology.org/amigo/term/GO:0031674
cellular response to thyroid hormone stimulus	Gene Ontology	GO:0097067	1	8	0.0404418	0.153386	CTSS	http://amigo.geneontology.org/amigo/term/GO:0097067
positive regulation of synapse maturation	Gene Ontology	GO:0090129	1	8	0.0404418	0.153386	NEUROD2	http://amigo.geneontology.org/amigo/term/GO:0090129
nuclear-transcribed mRNA catabolic process, exonucleolytic, 3'-5'	Gene Ontology	GO:0034427	1	8	0.0404418	0.153386	EXOSC4	http://amigo.geneontology.org/amigo/term/GO:0034427
K48-linked polyubiquitin modification-dependent protein binding	Gene Ontology	GO:0036435	1	8	0.0404418	0.153386	UBQLN4	http://amigo.geneontology.org/amigo/term/GO:0036435
head development	Gene Ontology	GO:0060322	1	8	0.0404418	0.153386	DLX6	http://amigo.geneontology.org/amigo/term/GO:0060322
mammary gland epithelial cell proliferation	Gene Ontology	GO:0033598	1	8	0.0404418	0.153386	TNFSF11	http://amigo.geneontology.org/amigo/term/GO:0033598
cell-cell adhesion mediated by cadherin	Gene Ontology	GO:0044331	1	8	0.0404418	0.153386	FER	http://amigo.geneontology.org/amigo/term/GO:0044331
response to amino acid	Gene Ontology	GO:0043200	1	8	0.0404418	0.153386	GLRA3	http://amigo.geneontology.org/amigo/term/GO:0043200
U1 snRNA binding	Gene Ontology	GO:0030619	1	8	0.0404418	0.153386	GEMIN5	http://amigo.geneontology.org/amigo/term/GO:0030619
exosome (RNase complex)	Gene Ontology	GO:0000178	1	8	0.0404418	0.153386	EXOSC4	http://amigo.geneontology.org/amigo/term/GO:0000178
co-SMAD binding	Gene Ontology	GO:0070410	1	8	0.0404418	0.153386	FOXH1	http://amigo.geneontology.org/amigo/term/GO:0070410
transcription corepressor binding	Gene Ontology	GO:0001222	1	8	0.0404418	0.153386	NR1D1	http://amigo.geneontology.org/amigo/term/GO:0001222
negative regulation of endocytosis	Gene Ontology	GO:0045806	1	8	0.0404418	0.153386	SYT11	http://amigo.geneontology.org/amigo/term/GO:0045806
hemidesmosome	Gene Ontology	GO:0030056	1	8	0.0404418	0.153386	PLEC	http://amigo.geneontology.org/amigo/term/GO:0030056
apoptotic DNA fragmentation	Gene Ontology	GO:0006309	1	8	0.0404418	0.153386	DFFB	http://amigo.geneontology.org/amigo/term/GO:0006309
protein localization to cell junction	Gene Ontology	GO:1902414	1	8	0.0404418	0.153386	LAMTOR2	http://amigo.geneontology.org/amigo/term/GO:1902414
Derlin-1 retrotranslocation complex	Gene Ontology	GO:0036513	1	8	0.0404418	0.153386	AMFR	http://amigo.geneontology.org/amigo/term/GO:0036513
cellular response to nerve growth factor stimulus	Gene Ontology	GO:1990090	1	8	0.0404418	0.153386	RAP1A	http://amigo.geneontology.org/amigo/term/GO:1990090
cholesterol transport	Gene Ontology	GO:0030301	1	8	0.0404418	0.153386	STARD3	http://amigo.geneontology.org/amigo/term/GO:0030301
regulation of epidermal growth factor receptor signaling pathway	Gene Ontology	GO:0042058	1	8	0.0404418	0.153386	FER	http://amigo.geneontology.org/amigo/term/GO:0042058
positive regulation of calcium-mediated signaling	Gene Ontology	GO:0050850	1	8	0.0404418	0.153386	NEUROD2	http://amigo.geneontology.org/amigo/term/GO:0050850
regulation of cell migration	Gene Ontology	GO:0030334	2	69	0.0420642	0.153386	HACE1|FGF1	http://amigo.geneontology.org/amigo/term/GO:0030334
mitotic cell cycle	Gene Ontology	GO:0000278	2	69	0.0420642	0.153386	AZI2|USP3	http://amigo.geneontology.org/amigo/term/GO:0000278
lysosome	Gene Ontology	GO:0005764	3	165	0.0421574	0.153386	CTSS|SYT11|SNX6	http://amigo.geneontology.org/amigo/term/GO:0005764
transcription, DNA-templated	Gene Ontology	GO:0006351	2	70	0.0431392	0.153386	PLAG1|SCX	http://amigo.geneontology.org/amigo/term/GO:0006351
nucleolus	Gene Ontology	GO:0005730	6	551	0.0433097	0.153386	PARP10|MED27|CCDC86|DFFB|ENDOV|EXOSC4	http://amigo.geneontology.org/amigo/term/GO:0005730
response to acidic pH	Gene Ontology	GO:0010447	1	9	0.0448339	0.153386	CTSS	http://amigo.geneontology.org/amigo/term/GO:0010447
3',5'-cyclic-AMP phosphodiesterase activity	Gene Ontology	GO:0004115	1	9	0.0448339	0.153386	PDE4D	http://amigo.geneontology.org/amigo/term/GO:0004115
early phagosome	Gene Ontology	GO:0032009	1	9	0.0448339	0.153386	SYT11	http://amigo.geneontology.org/amigo/term/GO:0032009
interleukin-6 production	Gene Ontology	GO:0032635	1	9	0.0448339	0.153386	AZI2	http://amigo.geneontology.org/amigo/term/GO:0032635
regulation of cytokine secretion	Gene Ontology	GO:0050707	1	9	0.0448339	0.153386	LYN	http://amigo.geneontology.org/amigo/term/GO:0050707
mitochondrial respiratory chain complex III	Gene Ontology	GO:0005750	1	9	0.0448339	0.153386	CYC1	http://amigo.geneontology.org/amigo/term/GO:0005750
positive regulation of cellular protein catabolic process	Gene Ontology	GO:1903364	1	9	0.0448339	0.153386	DACT1	http://amigo.geneontology.org/amigo/term/GO:1903364
glycine binding	Gene Ontology	GO:0016594	1	9	0.0448339	0.153386	GLRA3	http://amigo.geneontology.org/amigo/term/GO:0016594
3',5'-cyclic-nucleotide phosphodiesterase activity	Gene Ontology	GO:0004114	1	9	0.0448339	0.153386	PDE4D	http://amigo.geneontology.org/amigo/term/GO:0004114
microfibril	Gene Ontology	GO:0001527	1	9	0.0448339	0.153386	LTBP2	http://amigo.geneontology.org/amigo/term/GO:0001527
negative regulation of wound healing	Gene Ontology	GO:0061045	1	9	0.0448339	0.153386	AJAP1	http://amigo.geneontology.org/amigo/term/GO:0061045
guanyl-nucleotide exchange factor complex	Gene Ontology	GO:0032045	1	9	0.0448339	0.153386	RAP1A	http://amigo.geneontology.org/amigo/term/GO:0032045
exonuclease activity	Gene Ontology	GO:0004527	1	9	0.0448339	0.153386	EXOSC4	http://amigo.geneontology.org/amigo/term/GO:0004527
spliceosomal tri-snRNP complex assembly	Gene Ontology	GO:0000244	1	9	0.0448339	0.153386	PRPF19	http://amigo.geneontology.org/amigo/term/GO:0000244
clathrin-coated endocytic vesicle	Gene Ontology	GO:0045334	1	9	0.0448339	0.153386	MYO6	http://amigo.geneontology.org/amigo/term/GO:0045334
regulation of fibroblast migration	Gene Ontology	GO:0010762	1	9	0.0448339	0.153386	FER	http://amigo.geneontology.org/amigo/term/GO:0010762
positive regulation of cartilage development	Gene Ontology	GO:0061036	1	9	0.0448339	0.153386	SCX	http://amigo.geneontology.org/amigo/term/GO:0061036
type I transforming growth factor beta receptor binding	Gene Ontology	GO:0034713	1	9	0.0448339	0.153386	SNX6	http://amigo.geneontology.org/amigo/term/GO:0034713
peptidyl-serine dephosphorylation	Gene Ontology	GO:0070262	1	9	0.0448339	0.153386	PPP2R2C	http://amigo.geneontology.org/amigo/term/GO:0070262
pseudopodium	Gene Ontology	GO:0031143	1	9	0.0448339	0.153386	RAB25	http://amigo.geneontology.org/amigo/term/GO:0031143
hydrolase activity	Gene Ontology	GO:0016787	2	74	0.0475404	0.153386	NUDT21|OPLAH	http://amigo.geneontology.org/amigo/term/GO:0016787
rRNA catabolic process	Gene Ontology	GO:0016075	1	10	0.0492061	0.153386	EXOSC4	http://amigo.geneontology.org/amigo/term/GO:0016075
secondary heart field specification	Gene Ontology	GO:0003139	1	10	0.0492061	0.153386	FOXH1	http://amigo.geneontology.org/amigo/term/GO:0003139
regulation of proteasomal ubiquitin-dependent protein catabolic process	Gene Ontology	GO:0032434	1	10	0.0492061	0.153386	UBQLN4	http://amigo.geneontology.org/amigo/term/GO:0032434
positive regulation of gene silencing by miRNA	Gene Ontology	GO:2000637	1	10	0.0492061	0.153386	PUM2	http://amigo.geneontology.org/amigo/term/GO:2000637
cardiac right ventricle morphogenesis	Gene Ontology	GO:0003215	1	10	0.0492061	0.153386	FOXH1	http://amigo.geneontology.org/amigo/term/GO:0003215
photoreceptor cell outer segment organization	Gene Ontology	GO:0035845	1	10	0.0492061	0.153386	NPHP4	http://amigo.geneontology.org/amigo/term/GO:0035845
histone deubiquitination	Gene Ontology	GO:0016578	1	10	0.0492061	0.153386	USP3	http://amigo.geneontology.org/amigo/term/GO:0016578
mitochondrial ATP synthesis coupled proton transport	Gene Ontology	GO:0042776	1	10	0.0492061	0.153386	CYC1	http://amigo.geneontology.org/amigo/term/GO:0042776
pre-mRNA cleavage required for polyadenylation	Gene Ontology	GO:0098789	1	10	0.0492061	0.153386	NUDT21	http://amigo.geneontology.org/amigo/term/GO:0098789
S100 protein binding	Gene Ontology	GO:0044548	1	10	0.0492061	0.153386	FGF1	http://amigo.geneontology.org/amigo/term/GO:0044548
proteasome core complex, beta-subunit complex	Gene Ontology	GO:0019774	1	10	0.0492061	0.153386	PSMB4	http://amigo.geneontology.org/amigo/term/GO:0019774
ESCRT I complex	Gene Ontology	GO:0000813	1	10	0.0492061	0.153386	VPS28	http://amigo.geneontology.org/amigo/term/GO:0000813
cytoplasmic exosome (RNase complex)	Gene Ontology	GO:0000177	1	10	0.0492061	0.153386	EXOSC4	http://amigo.geneontology.org/amigo/term/GO:0000177
diacylglycerol metabolic process	Gene Ontology	GO:0046339	1	10	0.0492061	0.153386	DGAT1	http://amigo.geneontology.org/amigo/term/GO:0046339
dynactin binding	Gene Ontology	GO:0034452	1	10	0.0492061	0.153386	SNX6	http://amigo.geneontology.org/amigo/term/GO:0034452
positive regulation of podosome assembly	Gene Ontology	GO:0071803	1	10	0.0492061	0.153386	ASAP1	http://amigo.geneontology.org/amigo/term/GO:0071803
triglyceride biosynthetic process	Gene Ontology	GO:0019432	1	10	0.0492061	0.153386	DGAT1	http://amigo.geneontology.org/amigo/term/GO:0019432
SMN complex	Gene Ontology	GO:0032797	1	10	0.0492061	0.153386	GEMIN5	http://amigo.geneontology.org/amigo/term/GO:0032797
Rap protein signal transduction	Gene Ontology	GO:0032486	1	10	0.0492061	0.153386	RAP1A	http://amigo.geneontology.org/amigo/term/GO:0032486
aging	Gene Ontology	GO:0007568	1	10	0.0492061	0.153386	PDE4D	http://amigo.geneontology.org/amigo/term/GO:0007568
MCM complex	Gene Ontology	GO:0042555	1	10	0.0492061	0.153386	TONSL	http://amigo.geneontology.org/amigo/term/GO:0042555
regulation of release of sequestered calcium ion into cytosol	Gene Ontology	GO:0051279	1	10	0.0492061	0.153386	LYN	http://amigo.geneontology.org/amigo/term/GO:0051279
negative regulation of substrate adhesion-dependent cell spreading	Gene Ontology	GO:1900025	1	10	0.0492061	0.153386	KANK1	http://amigo.geneontology.org/amigo/term/GO:1900025
proteoglycan binding	Gene Ontology	GO:0043394	1	10	0.0492061	0.153386	CTSS	http://amigo.geneontology.org/amigo/term/GO:0043394
nerve growth factor signaling pathway	Gene Ontology	GO:0038180	1	10	0.0492061	0.153386	RAP1A	http://amigo.geneontology.org/amigo/term/GO:0038180
regulation of cell adhesion mediated by integrin	Gene Ontology	GO:0033628	1	10	0.0492061	0.153386	LYN	http://amigo.geneontology.org/amigo/term/GO:0033628
nucleoplasm	Gene Ontology	GO:0005654	14	1867	0.0493159	0.153386	HSF1|RAB11FIP2|OGFOD1|TP73|NCOA5|USP3|CCDC86|DFFB|KPNA4|BOP1|UBQLN4|STARD3|DACT1|FGF1	http://amigo.geneontology.org/amigo/term/GO:0005654
nuclear speck	Gene Ontology	GO:0016607	4	299	0.0508619	0.153386	PRPF19|PLAG1|CHD5|MSL1	http://amigo.geneontology.org/amigo/term/GO:0016607
dendritic spine	Gene Ontology	GO:0043197	2	78	0.0520979	0.153386	NR1D1|ASAP1	http://amigo.geneontology.org/amigo/term/GO:0043197
plasma membrane repair	Gene Ontology	GO:0001778	1	11	0.0535584	0.153386	SYT11	http://amigo.geneontology.org/amigo/term/GO:0001778
fibroblast migration	Gene Ontology	GO:0010761	1	11	0.0535584	0.153386	LAMTOR2	http://amigo.geneontology.org/amigo/term/GO:0010761
organ induction	Gene Ontology	GO:0001759	1	11	0.0535584	0.153386	FGF1	http://amigo.geneontology.org/amigo/term/GO:0001759
cellular response to copper ion	Gene Ontology	GO:0071280	1	11	0.0535584	0.153386	HSF1	http://amigo.geneontology.org/amigo/term/GO:0071280
regulation of heart contraction	Gene Ontology	GO:0008016	1	11	0.0535584	0.153386	THRA	http://amigo.geneontology.org/amigo/term/GO:0008016
cell projection membrane	Gene Ontology	GO:0031253	1	11	0.0535584	0.153386	ASAP1	http://amigo.geneontology.org/amigo/term/GO:0031253
toll-like receptor 4 signaling pathway	Gene Ontology	GO:0034142	1	11	0.0535584	0.153386	LYN	http://amigo.geneontology.org/amigo/term/GO:0034142
regulation of insulin secretion involved in cellular response to glucose stimulus	Gene Ontology	GO:0061178	1	11	0.0535584	0.153386	NR1D1	http://amigo.geneontology.org/amigo/term/GO:0061178
HMG box domain binding	Gene Ontology	GO:0071837	1	11	0.0535584	0.153386	DLX5	http://amigo.geneontology.org/amigo/term/GO:0071837
NLS-bearing protein import into nucleus	Gene Ontology	GO:0006607	1	11	0.0535584	0.153386	KPNA4	http://amigo.geneontology.org/amigo/term/GO:0006607
regulation of fat cell differentiation	Gene Ontology	GO:0045598	1	11	0.0535584	0.153386	NR1D1	http://amigo.geneontology.org/amigo/term/GO:0045598
cellular protein-containing complex assembly	Gene Ontology	GO:0034622	1	11	0.0535584	0.153386	HSF1	http://amigo.geneontology.org/amigo/term/GO:0034622
nuclear replication fork	Gene Ontology	GO:0043596	1	11	0.0535584	0.153386	TONSL	http://amigo.geneontology.org/amigo/term/GO:0043596
protein heterotetramerization	Gene Ontology	GO:0051290	1	11	0.0535584	0.153386	NUDT21	http://amigo.geneontology.org/amigo/term/GO:0051290
small ribosomal subunit	Gene Ontology	GO:0015935	1	11	0.0535584	0.153386	RPS20	http://amigo.geneontology.org/amigo/term/GO:0015935
calcium ion homeostasis	Gene Ontology	GO:0055074	1	11	0.0535584	0.153386	TNFSF11	http://amigo.geneontology.org/amigo/term/GO:0055074
DNA damage response, signal transduction by p53 class mediator	Gene Ontology	GO:0030330	1	11	0.0535584	0.153386	MYO6	http://amigo.geneontology.org/amigo/term/GO:0030330
maturation of 5.8S rRNA	Gene Ontology	GO:0000460	1	11	0.0535584	0.153386	EXOSC4	http://amigo.geneontology.org/amigo/term/GO:0000460
histone mRNA catabolic process	Gene Ontology	GO:0071044	1	11	0.0535584	0.153386	EXOSC4	http://amigo.geneontology.org/amigo/term/GO:0071044
inner dynein arm assembly	Gene Ontology	GO:0036159	1	11	0.0535584	0.153386	CCDC40	http://amigo.geneontology.org/amigo/term/GO:0036159
fatty acid homeostasis	Gene Ontology	GO:0055089	1	11	0.0535584	0.153386	DGAT1	http://amigo.geneontology.org/amigo/term/GO:0055089
negative regulation of phagocytosis	Gene Ontology	GO:0050765	1	11	0.0535584	0.153386	SYT11	http://amigo.geneontology.org/amigo/term/GO:0050765
mitochondrial electron transport, ubiquinol to cytochrome c	Gene Ontology	GO:0006122	1	11	0.0535584	0.153386	CYC1	http://amigo.geneontology.org/amigo/term/GO:0006122
protein mono-ADP-ribosylation	Gene Ontology	GO:0140289	1	11	0.0535584	0.153386	PARP10	http://amigo.geneontology.org/amigo/term/GO:0140289
smooth muscle contraction	Gene Ontology	GO:0006939	1	11	0.0535584	0.153386	PDE4D	http://amigo.geneontology.org/amigo/term/GO:0006939
ATP-dependent microtubule motor activity, minus-end-directed	Gene Ontology	GO:0008569	1	11	0.0535584	0.153386	DNAH3	http://amigo.geneontology.org/amigo/term/GO:0008569
BMP receptor binding	Gene Ontology	GO:0070700	1	11	0.0535584	0.153386	BMP3	http://amigo.geneontology.org/amigo/term/GO:0070700
multicellular organism growth	Gene Ontology	GO:0035264	2	80	0.054433	0.155431	PDE4D|PLAG1	http://amigo.geneontology.org/amigo/term/GO:0035264
microtubule cytoskeleton	Gene Ontology	GO:0015630	2	81	0.0556143	0.157718	SPTAN1|FER	http://amigo.geneontology.org/amigo/term/GO:0015630
Ras guanyl-nucleotide exchange factor activity	Gene Ontology	GO:0005088	1	12	0.0578909	0.157718	RASGEF1B	http://amigo.geneontology.org/amigo/term/GO:0005088
Prp19 complex	Gene Ontology	GO:0000974	1	12	0.0578909	0.157718	PRPF19	http://amigo.geneontology.org/amigo/term/GO:0000974
negative regulation of B cell proliferation	Gene Ontology	GO:0030889	1	12	0.0578909	0.157718	LYN	http://amigo.geneontology.org/amigo/term/GO:0030889
negative regulation of androgen receptor signaling pathway	Gene Ontology	GO:0060766	1	12	0.0578909	0.157718	FOXH1	http://amigo.geneontology.org/amigo/term/GO:0060766
RNA 7-methylguanosine cap binding	Gene Ontology	GO:0000340	1	12	0.0578909	0.157718	GEMIN5	http://amigo.geneontology.org/amigo/term/GO:0000340
regulation of calcium ion-dependent exocytosis	Gene Ontology	GO:0017158	1	12	0.0578909	0.157718	SYT11	http://amigo.geneontology.org/amigo/term/GO:0017158
cartilage condensation	Gene Ontology	GO:0001502	1	12	0.0578909	0.157718	THRA	http://amigo.geneontology.org/amigo/term/GO:0001502
aorta morphogenesis	Gene Ontology	GO:0035909	1	12	0.0578909	0.157718	FOXH1	http://amigo.geneontology.org/amigo/term/GO:0035909
positive regulation of exocytosis	Gene Ontology	GO:0045921	1	12	0.0578909	0.157718	RAB27A	http://amigo.geneontology.org/amigo/term/GO:0045921
positive regulation of sprouting angiogenesis	Gene Ontology	GO:1903672	1	12	0.0578909	0.157718	FGF1	http://amigo.geneontology.org/amigo/term/GO:1903672
maturation of LSU-rRNA from tricistronic rRNA transcript (SSU-rRNA, 5.8S rRNA, LSU-rRNA)	Gene Ontology	GO:0000463	1	12	0.0578909	0.157718	BOP1	http://amigo.geneontology.org/amigo/term/GO:0000463
inner cell mass cell proliferation	Gene Ontology	GO:0001833	1	12	0.0578909	0.157718	PRPF19	http://amigo.geneontology.org/amigo/term/GO:0001833
translation regulator activity	Gene Ontology	GO:0045182	1	12	0.0578909	0.157718	RPL22	http://amigo.geneontology.org/amigo/term/GO:0045182
recycling endosome	Gene Ontology	GO:0055037	2	83	0.0580037	0.157718	SYT11|RAB25	http://amigo.geneontology.org/amigo/term/GO:0055037
mRNA processing	Gene Ontology	GO:0006397	2	83	0.0580037	0.157718	HSF1|NUDT21	http://amigo.geneontology.org/amigo/term/GO:0006397
neuropeptide signaling pathway	Gene Ontology	GO:0007218	2	83	0.0580037	0.157718	GLRA3|PTGDR2	http://amigo.geneontology.org/amigo/term/GO:0007218
cell cortex	Gene Ontology	GO:0005938	2	86	0.0616536	0.1623	GRM7|FGF1	http://amigo.geneontology.org/amigo/term/GO:0005938
melanosome transport	Gene Ontology	GO:0032402	1	13	0.0622037	0.1623	RAB27A	http://amigo.geneontology.org/amigo/term/GO:0032402
positive regulation of collagen biosynthetic process	Gene Ontology	GO:0032967	1	13	0.0622037	0.1623	SCX	http://amigo.geneontology.org/amigo/term/GO:0032967
translation initiation factor binding	Gene Ontology	GO:0031369	1	13	0.0622037	0.1623	SYT11	http://amigo.geneontology.org/amigo/term/GO:0031369
positive regulation of fatty acid biosynthetic process	Gene Ontology	GO:0045723	1	13	0.0622037	0.1623	LPGAT1	http://amigo.geneontology.org/amigo/term/GO:0045723
negative regulation of endoplasmic reticulum stress-induced intrinsic apoptotic signaling pathway	Gene Ontology	GO:1902236	1	13	0.0622037	0.1623	GRINA	http://amigo.geneontology.org/amigo/term/GO:1902236
O-acyltransferase activity	Gene Ontology	GO:0008374	1	13	0.0622037	0.1623	DGAT1	http://amigo.geneontology.org/amigo/term/GO:0008374
maintenance of protein location in nucleus	Gene Ontology	GO:0051457	1	13	0.0622037	0.1623	MORC3	http://amigo.geneontology.org/amigo/term/GO:0051457
interferon-gamma production	Gene Ontology	GO:0032609	1	13	0.0622037	0.1623	AZI2	http://amigo.geneontology.org/amigo/term/GO:0032609
lipid biosynthetic process	Gene Ontology	GO:0008610	1	13	0.0622037	0.1623	PRPF19	http://amigo.geneontology.org/amigo/term/GO:0008610
endoplasmic reticulum calcium ion homeostasis	Gene Ontology	GO:0032469	1	13	0.0622037	0.1623	GRINA	http://amigo.geneontology.org/amigo/term/GO:0032469
ventricular trabecula myocardium morphogenesis	Gene Ontology	GO:0003222	1	13	0.0622037	0.1623	FOXH1	http://amigo.geneontology.org/amigo/term/GO:0003222
cell aging	Gene Ontology	GO:0007569	1	13	0.0622037	0.1623	MORC3	http://amigo.geneontology.org/amigo/term/GO:0007569
protein phosphatase type 2A complex	Gene Ontology	GO:0000159	1	13	0.0622037	0.1623	PPP2R2C	http://amigo.geneontology.org/amigo/term/GO:0000159
nuclear exosome (RNase complex)	Gene Ontology	GO:0000176	1	13	0.0622037	0.1623	EXOSC4	http://amigo.geneontology.org/amigo/term/GO:0000176
positive regulation of gene expression	Gene Ontology	GO:0010628	3	195	0.0628109	0.163203	ITGB8|SCX|FGF1	http://amigo.geneontology.org/amigo/term/GO:0010628
integrin binding	Gene Ontology	GO:0005178	2	88	0.0641293	0.164137	ITGB8|FGF1	http://amigo.geneontology.org/amigo/term/GO:0005178
focal adhesion assembly	Gene Ontology	GO:0048041	1	14	0.0664969	0.164137	PEAK1	http://amigo.geneontology.org/amigo/term/GO:0048041
glycogen biosynthetic process	Gene Ontology	GO:0005978	1	14	0.0664969	0.164137	NR1D1	http://amigo.geneontology.org/amigo/term/GO:0005978
response to hydrogen peroxide	Gene Ontology	GO:0042542	1	14	0.0664969	0.164137	KPNA4	http://amigo.geneontology.org/amigo/term/GO:0042542
spliceosomal complex assembly	Gene Ontology	GO:0000245	1	14	0.0664969	0.164137	PRPF19	http://amigo.geneontology.org/amigo/term/GO:0000245
Flemming body	Gene Ontology	GO:0090543	1	14	0.0664969	0.164137	USP3	http://amigo.geneontology.org/amigo/term/GO:0090543
dendrite cytoplasm	Gene Ontology	GO:0032839	1	14	0.0664969	0.164137	PPP1R1B	http://amigo.geneontology.org/amigo/term/GO:0032839
protein kinase A binding	Gene Ontology	GO:0051018	1	14	0.0664969	0.164137	DACT1	http://amigo.geneontology.org/amigo/term/GO:0051018
high voltage-gated calcium channel activity	Gene Ontology	GO:0008331	1	14	0.0664969	0.164137	CACNA1C	http://amigo.geneontology.org/amigo/term/GO:0008331
regulated exocytosis	Gene Ontology	GO:0045055	1	14	0.0664969	0.164137	RAB11FIP2	http://amigo.geneontology.org/amigo/term/GO:0045055
epithelial cell morphogenesis	Gene Ontology	GO:0003382	1	14	0.0664969	0.164137	RAB25	http://amigo.geneontology.org/amigo/term/GO:0003382
cGMP binding	Gene Ontology	GO:0030553	1	14	0.0664969	0.164137	PRKG2	http://amigo.geneontology.org/amigo/term/GO:0030553
mammary gland alveolus development	Gene Ontology	GO:0060749	1	14	0.0664969	0.164137	TNFSF11	http://amigo.geneontology.org/amigo/term/GO:0060749
protein ADP-ribosylase activity	Gene Ontology	GO:1990404	1	14	0.0664969	0.164137	PARP10	http://amigo.geneontology.org/amigo/term/GO:1990404
negative regulation of cell-matrix adhesion	Gene Ontology	GO:0001953	1	14	0.0664969	0.164137	AJAP1	http://amigo.geneontology.org/amigo/term/GO:0001953
protein tetramerization	Gene Ontology	GO:0051262	1	14	0.0664969	0.164137	TP73	http://amigo.geneontology.org/amigo/term/GO:0051262
structural constituent of muscle	Gene Ontology	GO:0008307	1	14	0.0664969	0.164137	PLEC	http://amigo.geneontology.org/amigo/term/GO:0008307
ubiquitin-specific protease binding	Gene Ontology	GO:1990381	1	14	0.0664969	0.164137	AMFR	http://amigo.geneontology.org/amigo/term/GO:1990381
dendrite	Gene Ontology	GO:0030425	3	201	0.067413	0.165624	NR1D1|SYT11|GRM7	http://amigo.geneontology.org/amigo/term/GO:0030425
intermediate filament cytoskeleton organization	Gene Ontology	GO:0045104	1	15	0.0707706	0.166277	PLEC	http://amigo.geneontology.org/amigo/term/GO:0045104
nucleotidyltransferase activity	Gene Ontology	GO:0016779	1	15	0.0707706	0.166277	NUDT5	http://amigo.geneontology.org/amigo/term/GO:0016779
somite development	Gene Ontology	GO:0061053	1	15	0.0707706	0.166277	RAD51B	http://amigo.geneontology.org/amigo/term/GO:0061053
positive regulation of interleukin-2 production	Gene Ontology	GO:0032743	1	15	0.0707706	0.166277	PDE4D	http://amigo.geneontology.org/amigo/term/GO:0032743
GTP-dependent protein binding	Gene Ontology	GO:0030742	1	15	0.0707706	0.166277	RAB3C	http://amigo.geneontology.org/amigo/term/GO:0030742
cholesterol transfer activity	Gene Ontology	GO:0120020	1	15	0.0707706	0.166277	STARD3	http://amigo.geneontology.org/amigo/term/GO:0120020
regulation of neuron migration	Gene Ontology	GO:2001222	1	15	0.0707706	0.166277	SCRT1	http://amigo.geneontology.org/amigo/term/GO:2001222
positive regulation of G protein-coupled receptor signaling pathway	Gene Ontology	GO:0045745	1	15	0.0707706	0.166277	PTGDR2	http://amigo.geneontology.org/amigo/term/GO:0045745
positive regulation of bone resorption	Gene Ontology	GO:0045780	1	15	0.0707706	0.166277	TNFSF11	http://amigo.geneontology.org/amigo/term/GO:0045780
negative regulation of actin filament polymerization	Gene Ontology	GO:0030837	1	15	0.0707706	0.166277	KANK1	http://amigo.geneontology.org/amigo/term/GO:0030837
zinc ion transmembrane transporter activity	Gene Ontology	GO:0005385	1	15	0.0707706	0.166277	SLC39A4	http://amigo.geneontology.org/amigo/term/GO:0005385
regulation of establishment of cell polarity	Gene Ontology	GO:2000114	1	15	0.0707706	0.166277	KANK1	http://amigo.geneontology.org/amigo/term/GO:2000114
positive regulation of cell-cell adhesion	Gene Ontology	GO:0022409	1	15	0.0707706	0.166277	CD47	http://amigo.geneontology.org/amigo/term/GO:0022409
SMN-Sm protein complex	Gene Ontology	GO:0034719	1	15	0.0707706	0.166277	GEMIN5	http://amigo.geneontology.org/amigo/term/GO:0034719
establishment of endothelial barrier	Gene Ontology	GO:0061028	1	15	0.0707706	0.166277	RAP1A	http://amigo.geneontology.org/amigo/term/GO:0061028
tissue homeostasis	Gene Ontology	GO:0001894	1	15	0.0707706	0.166277	SCX	http://amigo.geneontology.org/amigo/term/GO:0001894
positive regulation of angiogenesis	Gene Ontology	GO:0045766	2	95	0.0730501	0.170803	ITGB8|FGF1	http://amigo.geneontology.org/amigo/term/GO:0045766
nuclear import signal receptor activity	Gene Ontology	GO:0061608	1	16	0.075025	0.171688	KPNA4	http://amigo.geneontology.org/amigo/term/GO:0061608
regulation of heart rate	Gene Ontology	GO:0002027	1	16	0.075025	0.171688	PDE4D	http://amigo.geneontology.org/amigo/term/GO:0002027
activation of protein kinase B activity	Gene Ontology	GO:0032148	1	16	0.075025	0.171688	FGF1	http://amigo.geneontology.org/amigo/term/GO:0032148
fibroblast growth factor binding	Gene Ontology	GO:0017134	1	16	0.075025	0.171688	GLG1	http://amigo.geneontology.org/amigo/term/GO:0017134
positive regulation of mRNA splicing, via spliceosome	Gene Ontology	GO:0048026	1	16	0.075025	0.171688	PRPF19	http://amigo.geneontology.org/amigo/term/GO:0048026
negative regulation of Rho protein signal transduction	Gene Ontology	GO:0035024	1	16	0.075025	0.171688	KANK1	http://amigo.geneontology.org/amigo/term/GO:0035024
cellular response to cadmium ion	Gene Ontology	GO:0071276	1	16	0.075025	0.171688	HSF1	http://amigo.geneontology.org/amigo/term/GO:0071276
B cell homeostasis	Gene Ontology	GO:0001782	1	16	0.075025	0.171688	LYN	http://amigo.geneontology.org/amigo/term/GO:0001782
neuropeptide binding	Gene Ontology	GO:0042923	1	16	0.075025	0.171688	PTGDR2	http://amigo.geneontology.org/amigo/term/GO:0042923
Golgi apparatus	Gene Ontology	GO:0005794	6	639	0.0763927	0.173976	GRINA|MYO6|TP73|AMFR|PARP10|LYN	http://amigo.geneontology.org/amigo/term/GO:0005794
negative regulation of canonical Wnt signaling pathway	Gene Ontology	GO:0090090	2	98	0.0769891	0.173976	AMFR|DACT1	http://amigo.geneontology.org/amigo/term/GO:0090090
lipid binding	Gene Ontology	GO:0008289	2	98	0.0769891	0.173976	ACOT11|FER	http://amigo.geneontology.org/amigo/term/GO:0008289
snoRNA binding	Gene Ontology	GO:0030515	1	17	0.0792599	0.173976	NUDT5	http://amigo.geneontology.org/amigo/term/GO:0030515
cell-cell adhesion mediator activity	Gene Ontology	GO:0098632	1	17	0.0792599	0.173976	CD47	http://amigo.geneontology.org/amigo/term/GO:0098632
associative learning	Gene Ontology	GO:0008306	1	17	0.0792599	0.173976	NEUROD2	http://amigo.geneontology.org/amigo/term/GO:0008306
cell adhesion mediated by integrin	Gene Ontology	GO:0033627	1	17	0.0792599	0.173976	ITGB8	http://amigo.geneontology.org/amigo/term/GO:0033627
fibronectin binding	Gene Ontology	GO:0001968	1	17	0.0792599	0.173976	CTSS	http://amigo.geneontology.org/amigo/term/GO:0001968
transferase activity, transferring acyl groups	Gene Ontology	GO:0016746	1	17	0.0792599	0.173976	LPGAT1	http://amigo.geneontology.org/amigo/term/GO:0016746
negative regulation of JNK cascade	Gene Ontology	GO:0046329	1	17	0.0792599	0.173976	DACT1	http://amigo.geneontology.org/amigo/term/GO:0046329
response to hormone	Gene Ontology	GO:0009725	1	17	0.0792599	0.173976	LYN	http://amigo.geneontology.org/amigo/term/GO:0009725
cellular zinc ion homeostasis	Gene Ontology	GO:0006882	1	17	0.0792599	0.173976	SLC39A4	http://amigo.geneontology.org/amigo/term/GO:0006882
cellular glucose homeostasis	Gene Ontology	GO:0001678	1	17	0.0792599	0.173976	NR1D1	http://amigo.geneontology.org/amigo/term/GO:0001678
regulation of focal adhesion assembly	Gene Ontology	GO:0051893	1	17	0.0792599	0.173976	PEAK1	http://amigo.geneontology.org/amigo/term/GO:0051893
cellular response to unfolded protein	Gene Ontology	GO:0034620	1	17	0.0792599	0.173976	HSF1	http://amigo.geneontology.org/amigo/term/GO:0034620
negative regulation of neurogenesis	Gene Ontology	GO:0050768	1	17	0.0792599	0.173976	PRTG	http://amigo.geneontology.org/amigo/term/GO:0050768
chemical synaptic transmission	Gene Ontology	GO:0007268	2	102	0.082343	0.175662	GLRA3|GRM7	http://amigo.geneontology.org/amigo/term/GO:0007268
site of DNA damage	Gene Ontology	GO:0090734	1	18	0.0834756	0.175662	UBQLN4	http://amigo.geneontology.org/amigo/term/GO:0090734
exocytic vesicle	Gene Ontology	GO:0070382	1	18	0.0834756	0.175662	SYT11	http://amigo.geneontology.org/amigo/term/GO:0070382
positive regulation of wound healing	Gene Ontology	GO:0090303	1	18	0.0834756	0.175662	KANK1	http://amigo.geneontology.org/amigo/term/GO:0090303
protein phosphatase regulator activity	Gene Ontology	GO:0019888	1	18	0.0834756	0.175662	PPP2R2C	http://amigo.geneontology.org/amigo/term/GO:0019888
dynein complex	Gene Ontology	GO:0030286	1	18	0.0834756	0.175662	DNAH3	http://amigo.geneontology.org/amigo/term/GO:0030286
negative regulation of double-strand break repair via homologous recombination	Gene Ontology	GO:2000042	1	18	0.0834756	0.175662	UBQLN4	http://amigo.geneontology.org/amigo/term/GO:2000042
TBP-class protein binding	Gene Ontology	GO:0017025	1	18	0.0834756	0.175662	THRA	http://amigo.geneontology.org/amigo/term/GO:0017025
neural tube development	Gene Ontology	GO:0021915	1	18	0.0834756	0.175662	DACT1	http://amigo.geneontology.org/amigo/term/GO:0021915
ankyrin binding	Gene Ontology	GO:0030506	1	18	0.0834756	0.175662	PLEC	http://amigo.geneontology.org/amigo/term/GO:0030506
regulation of dopamine secretion	Gene Ontology	GO:0014059	1	18	0.0834756	0.175662	SYT11	http://amigo.geneontology.org/amigo/term/GO:0014059
negative regulation of fibroblast proliferation	Gene Ontology	GO:0048147	1	18	0.0834756	0.175662	MORC3	http://amigo.geneontology.org/amigo/term/GO:0048147
cell-cell contact zone	Gene Ontology	GO:0044291	1	18	0.0834756	0.175662	AJAP1	http://amigo.geneontology.org/amigo/term/GO:0044291
dynein light intermediate chain binding	Gene Ontology	GO:0051959	1	18	0.0834756	0.175662	DNAH3	http://amigo.geneontology.org/amigo/term/GO:0051959
calcium-ion regulated exocytosis	Gene Ontology	GO:0017156	1	18	0.0834756	0.175662	SYT11	http://amigo.geneontology.org/amigo/term/GO:0017156
myosin binding	Gene Ontology	GO:0017022	1	18	0.0834756	0.175662	USH2A	http://amigo.geneontology.org/amigo/term/GO:0017022
cAMP binding	Gene Ontology	GO:0030552	1	18	0.0834756	0.175662	PDE4D	http://amigo.geneontology.org/amigo/term/GO:0030552
Rab GTPase binding	Gene Ontology	GO:0017137	2	103	0.083699	0.17575	RAB11FIP2|HACE1	http://amigo.geneontology.org/amigo/term/GO:0017137
protein binding	Gene Ontology	GO:0005515	3	224	0.0864111	0.178667	CTSS|FGF1|NPHP4	http://amigo.geneontology.org/amigo/term/GO:0005515
protein phosphatase inhibitor activity	Gene Ontology	GO:0004864	1	19	0.0876722	0.178667	PPP1R1B	http://amigo.geneontology.org/amigo/term/GO:0004864
cellular response to cytokine stimulus	Gene Ontology	GO:0071345	1	19	0.0876722	0.178667	FOXH1	http://amigo.geneontology.org/amigo/term/GO:0071345
double-strand break repair via nonhomologous end joining	Gene Ontology	GO:0006303	1	19	0.0876722	0.178667	PRPF19	http://amigo.geneontology.org/amigo/term/GO:0006303
protein phosphatase 1 binding	Gene Ontology	GO:0008157	1	19	0.0876722	0.178667	FER	http://amigo.geneontology.org/amigo/term/GO:0008157
proteasome core complex	Gene Ontology	GO:0005839	1	19	0.0876722	0.178667	PSMB4	http://amigo.geneontology.org/amigo/term/GO:0005839
R-SMAD binding	Gene Ontology	GO:0070412	1	19	0.0876722	0.178667	FOXH1	http://amigo.geneontology.org/amigo/term/GO:0070412
growth factor binding	Gene Ontology	GO:0019838	1	19	0.0876722	0.178667	LTBP2	http://amigo.geneontology.org/amigo/term/GO:0019838
laminin binding	Gene Ontology	GO:0043236	1	19	0.0876722	0.178667	CTSS	http://amigo.geneontology.org/amigo/term/GO:0043236
integrin complex	Gene Ontology	GO:0008305	1	19	0.0876722	0.178667	ITGB8	http://amigo.geneontology.org/amigo/term/GO:0008305
L-ascorbic acid binding	Gene Ontology	GO:0031418	1	19	0.0876722	0.178667	OGFOD1	http://amigo.geneontology.org/amigo/term/GO:0031418
negative regulation of DNA binding	Gene Ontology	GO:0043392	1	19	0.0876722	0.178667	ZFP90	http://amigo.geneontology.org/amigo/term/GO:0043392
negative regulation of peptidyl-serine phosphorylation	Gene Ontology	GO:0033137	1	19	0.0876722	0.178667	PDE4D	http://amigo.geneontology.org/amigo/term/GO:0033137
preribosome, large subunit precursor	Gene Ontology	GO:0030687	1	19	0.0876722	0.178667	BOP1	http://amigo.geneontology.org/amigo/term/GO:0030687
metal ion binding	Gene Ontology	GO:0046872	9	1164	0.0899177	0.18145	CHD5|GNAO1|CYC1|TP73|ZFP90|CMC1|CYHR1|PDE4D|ASAP1	http://amigo.geneontology.org/amigo/term/GO:0046872
positive regulation of NF-kappaB transcription factor activity	Gene Ontology	GO:0051092	2	108	0.0905801	0.18145	TNFSF11|FER	http://amigo.geneontology.org/amigo/term/GO:0051092
negative regulation of signal transduction	Gene Ontology	GO:0009968	1	20	0.0918497	0.18145	RGS7	http://amigo.geneontology.org/amigo/term/GO:0009968
positive regulation of cell cycle arrest	Gene Ontology	GO:0071158	1	20	0.0918497	0.18145	TP73	http://amigo.geneontology.org/amigo/term/GO:0071158
androgen receptor binding	Gene Ontology	GO:0050681	1	20	0.0918497	0.18145	FOXH1	http://amigo.geneontology.org/amigo/term/GO:0050681
bone resorption	Gene Ontology	GO:0045453	1	20	0.0918497	0.18145	TNFSF11	http://amigo.geneontology.org/amigo/term/GO:0045453
positive regulation of phosphatidylinositol 3-kinase activity	Gene Ontology	GO:0043552	1	20	0.0918497	0.18145	LYN	http://amigo.geneontology.org/amigo/term/GO:0043552
motile cilium assembly	Gene Ontology	GO:0044458	1	20	0.0918497	0.18145	CCDC40	http://amigo.geneontology.org/amigo/term/GO:0044458
nuclear localization sequence binding	Gene Ontology	GO:0008139	1	20	0.0918497	0.18145	KPNA4	http://amigo.geneontology.org/amigo/term/GO:0008139
membrane fusion	Gene Ontology	GO:0061025	1	20	0.0918497	0.18145	HACE1	http://amigo.geneontology.org/amigo/term/GO:0061025
histone acetyltransferase binding	Gene Ontology	GO:0035035	1	20	0.0918497	0.18145	MEF2A	http://amigo.geneontology.org/amigo/term/GO:0035035
threonine-type endopeptidase activity	Gene Ontology	GO:0004298	1	20	0.0918497	0.18145	PSMB4	http://amigo.geneontology.org/amigo/term/GO:0004298
regulation of mRNA stability	Gene Ontology	GO:0043488	1	20	0.0918497	0.18145	PUM2	http://amigo.geneontology.org/amigo/term/GO:0043488
ERK1 and ERK2 cascade	Gene Ontology	GO:0070371	1	20	0.0918497	0.18145	TNFSF11	http://amigo.geneontology.org/amigo/term/GO:0070371
transcriptionally active chromatin	Gene Ontology	GO:0035327	1	20	0.0918497	0.18145	EXOSC4	http://amigo.geneontology.org/amigo/term/GO:0035327
integral component of plasma membrane	Gene Ontology	GO:0005887	6	677	0.0941576	0.184763	PTGDR2|GLRA3|SLC52A2|CD47|SYT11|SLC39A4	http://amigo.geneontology.org/amigo/term/GO:0005887
ciliary basal body	Gene Ontology	GO:0036064	2	111	0.0947862	0.184763	DAAM1|USH2A	http://amigo.geneontology.org/amigo/term/GO:0036064
activation of MAPKK activity	Gene Ontology	GO:0000186	1	21	0.0960082	0.184763	LAMTOR2	http://amigo.geneontology.org/amigo/term/GO:0000186
G-protein beta-subunit binding	Gene Ontology	GO:0031681	1	21	0.0960082	0.184763	RGS7	http://amigo.geneontology.org/amigo/term/GO:0031681
dynein intermediate chain binding	Gene Ontology	GO:0045505	1	21	0.0960082	0.184763	DNAH3	http://amigo.geneontology.org/amigo/term/GO:0045505
positive regulation of epithelial cell migration	Gene Ontology	GO:0010634	1	21	0.0960082	0.184763	RAB25	http://amigo.geneontology.org/amigo/term/GO:0010634
establishment of cell polarity	Gene Ontology	GO:0030010	1	21	0.0960082	0.184763	RAB11FIP2	http://amigo.geneontology.org/amigo/term/GO:0030010
calcium ion import	Gene Ontology	GO:0070509	1	21	0.0960082	0.184763	CACNA1C	http://amigo.geneontology.org/amigo/term/GO:0070509
replication fork processing	Gene Ontology	GO:0031297	1	21	0.0960082	0.184763	TONSL	http://amigo.geneontology.org/amigo/term/GO:0031297
ribosomal large subunit assembly	Gene Ontology	GO:0000027	1	21	0.0960082	0.184763	BOP1	http://amigo.geneontology.org/amigo/term/GO:0000027
epidermal growth factor receptor binding	Gene Ontology	GO:0005154	1	21	0.0960082	0.184763	FER	http://amigo.geneontology.org/amigo/term/GO:0005154
T cell activation	Gene Ontology	GO:0042110	1	21	0.0960082	0.184763	AZI2	http://amigo.geneontology.org/amigo/term/GO:0042110
cellular response to reactive oxygen species	Gene Ontology	GO:0034614	1	21	0.0960082	0.184763	FER	http://amigo.geneontology.org/amigo/term/GO:0034614
protein localization to plasma membrane	Gene Ontology	GO:0072659	2	114	0.0990477	0.188973	RAB3C|RAP1A	http://amigo.geneontology.org/amigo/term/GO:0072659
antigen processing and presentation	Gene Ontology	GO:0019882	1	22	0.100148	0.188973	RAB3C	http://amigo.geneontology.org/amigo/term/GO:0019882
ephrin receptor binding	Gene Ontology	GO:0046875	1	22	0.100148	0.188973	LYN	http://amigo.geneontology.org/amigo/term/GO:0046875
tumor necrosis factor receptor binding	Gene Ontology	GO:0005164	1	22	0.100148	0.188973	TNFSF11	http://amigo.geneontology.org/amigo/term/GO:0005164
fibroblast growth factor receptor binding	Gene Ontology	GO:0005104	1	22	0.100148	0.188973	FGF1	http://amigo.geneontology.org/amigo/term/GO:0005104
proteasomal ubiquitin-independent protein catabolic process	Gene Ontology	GO:0010499	1	22	0.100148	0.188973	PSMB4	http://amigo.geneontology.org/amigo/term/GO:0010499
NAD+ ADP-ribosyltransferase activity	Gene Ontology	GO:0003950	1	22	0.100148	0.188973	PARP10	http://amigo.geneontology.org/amigo/term/GO:0003950
proteolysis involved in cellular protein catabolic process	Gene Ontology	GO:0051603	1	22	0.100148	0.188973	CTSS	http://amigo.geneontology.org/amigo/term/GO:0051603
spliceosomal snRNP assembly	Gene Ontology	GO:0000387	1	22	0.100148	0.188973	GEMIN5	http://amigo.geneontology.org/amigo/term/GO:0000387
growth factor activity	Gene Ontology	GO:0008083	2	116	0.101918	0.191196	BMP3|FGF1	http://amigo.geneontology.org/amigo/term/GO:0008083
endoplasmic reticulum membrane	Gene Ontology	GO:0005789	4	384	0.103036	0.192919	DGAT1|STARD3|SSR2|UBQLN4	http://amigo.geneontology.org/amigo/term/GO:0005789
negative regulation of G1/S transition of mitotic cell cycle	Gene Ontology	GO:2000134	1	23	0.104269	0.192987	DACT1	http://amigo.geneontology.org/amigo/term/GO:2000134
bone morphogenesis	Gene Ontology	GO:0060349	1	23	0.104269	0.192987	GLG1	http://amigo.geneontology.org/amigo/term/GO:0060349
mitotic spindle pole	Gene Ontology	GO:0097431	1	23	0.104269	0.192987	HSF1	http://amigo.geneontology.org/amigo/term/GO:0097431
filamentous actin	Gene Ontology	GO:0031941	1	23	0.104269	0.192987	MYO6	http://amigo.geneontology.org/amigo/term/GO:0031941
glutathione metabolic process	Gene Ontology	GO:0006749	1	23	0.104269	0.192987	OPLAH	http://amigo.geneontology.org/amigo/term/GO:0006749
regulation of lipid metabolic process	Gene Ontology	GO:0019216	1	23	0.104269	0.192987	NR1D1	http://amigo.geneontology.org/amigo/term/GO:0019216
protein polyubiquitination	Gene Ontology	GO:0000209	2	119	0.106267	0.195564	HACE1|AREL1	http://amigo.geneontology.org/amigo/term/GO:0000209
histone binding	Gene Ontology	GO:0042393	2	119	0.106267	0.195564	TONSL|USP3	http://amigo.geneontology.org/amigo/term/GO:0042393
activation of JUN kinase activity	Gene Ontology	GO:0007257	1	24	0.108371	0.195714	TNFSF11	http://amigo.geneontology.org/amigo/term/GO:0007257
collagen catabolic process	Gene Ontology	GO:0030574	1	24	0.108371	0.195714	CTSS	http://amigo.geneontology.org/amigo/term/GO:0030574
response to cold	Gene Ontology	GO:0009409	1	24	0.108371	0.195714	THRA	http://amigo.geneontology.org/amigo/term/GO:0009409
regulation of exocytosis	Gene Ontology	GO:0017157	1	24	0.108371	0.195714	RAB3C	http://amigo.geneontology.org/amigo/term/GO:0017157
behavioral fear response	Gene Ontology	GO:0001662	1	24	0.108371	0.195714	NEUROD2	http://amigo.geneontology.org/amigo/term/GO:0001662
podosome	Gene Ontology	GO:0002102	1	24	0.108371	0.195714	ASAP1	http://amigo.geneontology.org/amigo/term/GO:0002102
intracellular receptor signaling pathway	Gene Ontology	GO:0030522	1	24	0.108371	0.195714	NR1D1	http://amigo.geneontology.org/amigo/term/GO:0030522
thyroid gland development	Gene Ontology	GO:0030878	1	24	0.108371	0.195714	THRA	http://amigo.geneontology.org/amigo/term/GO:0030878
platelet-derived growth factor receptor signaling pathway	Gene Ontology	GO:0048008	1	24	0.108371	0.195714	FER	http://amigo.geneontology.org/amigo/term/GO:0048008
lipid storage	Gene Ontology	GO:0019915	1	24	0.108371	0.195714	DGAT1	http://amigo.geneontology.org/amigo/term/GO:0019915
ribonucleoprotein complex binding	Gene Ontology	GO:0043021	1	25	0.112454	0.201584	BOP1	http://amigo.geneontology.org/amigo/term/GO:0043021
monocyte chemotaxis	Gene Ontology	GO:0002548	1	25	0.112454	0.201584	TNFSF11	http://amigo.geneontology.org/amigo/term/GO:0002548
negative regulation of neuron projection development	Gene Ontology	GO:0010977	1	25	0.112454	0.201584	KANK1	http://amigo.geneontology.org/amigo/term/GO:0010977
establishment of protein localization	Gene Ontology	GO:0045184	1	26	0.116519	0.206198	USH2A	http://amigo.geneontology.org/amigo/term/GO:0045184
negative regulation of proteasomal ubiquitin-dependent protein catabolic process	Gene Ontology	GO:0032435	1	26	0.116519	0.206198	TLK2	http://amigo.geneontology.org/amigo/term/GO:0032435
positive regulation of cell division	Gene Ontology	GO:0051781	1	26	0.116519	0.206198	FGF1	http://amigo.geneontology.org/amigo/term/GO:0051781
activating transcription factor binding	Gene Ontology	GO:0033613	1	26	0.116519	0.206198	MEF2A	http://amigo.geneontology.org/amigo/term/GO:0033613
negative regulation of protein-containing complex assembly	Gene Ontology	GO:0031333	1	26	0.116519	0.206198	HSF1	http://amigo.geneontology.org/amigo/term/GO:0031333
cytoplasmic side of plasma membrane	Gene Ontology	GO:0009898	1	26	0.116519	0.206198	AJAP1	http://amigo.geneontology.org/amigo/term/GO:0009898
calcium ion binding	Gene Ontology	GO:0005509	5	560	0.11809	0.208233	NID2|LTBP2|SYT11|MAN1A1|SPTAN1	http://amigo.geneontology.org/amigo/term/GO:0005509
protein dimerization activity	Gene Ontology	GO:0046983	2	127	0.118099	0.208233	MEF2A|SCX	http://amigo.geneontology.org/amigo/term/GO:0046983
translation	Gene Ontology	GO:0006412	2	128	0.119601	0.209153	RPS20|MRPL22	http://amigo.geneontology.org/amigo/term/GO:0006412
positive regulation of mitotic cell cycle	Gene Ontology	GO:0045931	1	27	0.120565	0.209153	HSF1	http://amigo.geneontology.org/amigo/term/GO:0045931
regulation of protein phosphorylation	Gene Ontology	GO:0001932	1	27	0.120565	0.209153	FER	http://amigo.geneontology.org/amigo/term/GO:0001932
polyubiquitin modification-dependent protein binding	Gene Ontology	GO:0031593	1	27	0.120565	0.209153	UBQLN4	http://amigo.geneontology.org/amigo/term/GO:0031593
peptidyl-tyrosine autophosphorylation	Gene Ontology	GO:0038083	1	27	0.120565	0.209153	LYN	http://amigo.geneontology.org/amigo/term/GO:0038083
vesicle docking involved in exocytosis	Gene Ontology	GO:0006904	1	27	0.120565	0.209153	RAB3C	http://amigo.geneontology.org/amigo/term/GO:0006904
learning or memory	Gene Ontology	GO:0007611	1	27	0.120565	0.209153	THRA	http://amigo.geneontology.org/amigo/term/GO:0007611
positive regulation of TOR signaling	Gene Ontology	GO:0032008	1	27	0.120565	0.209153	LAMTOR2	http://amigo.geneontology.org/amigo/term/GO:0032008
miRNA binding	Gene Ontology	GO:0035198	1	27	0.120565	0.209153	PUM2	http://amigo.geneontology.org/amigo/term/GO:0035198
ribosome	Gene Ontology	GO:0005840	1	28	0.124593	0.212335	RPL22	http://amigo.geneontology.org/amigo/term/GO:0005840
B cell receptor signaling pathway	Gene Ontology	GO:0050853	1	28	0.124593	0.212335	LYN	http://amigo.geneontology.org/amigo/term/GO:0050853
dendrite morphogenesis	Gene Ontology	GO:0048813	1	28	0.124593	0.212335	MEF2A	http://amigo.geneontology.org/amigo/term/GO:0048813
mRNA transport	Gene Ontology	GO:0051028	1	28	0.124593	0.212335	HSF1	http://amigo.geneontology.org/amigo/term/GO:0051028
intrinsic apoptotic signaling pathway in response to DNA damage by p53 class mediator	Gene Ontology	GO:0042771	1	28	0.124593	0.212335	TP73	http://amigo.geneontology.org/amigo/term/GO:0042771
embryonic skeletal system development	Gene Ontology	GO:0048706	1	28	0.124593	0.212335	SCX	http://amigo.geneontology.org/amigo/term/GO:0048706
mesoderm formation	Gene Ontology	GO:0001707	1	28	0.124593	0.212335	SCX	http://amigo.geneontology.org/amigo/term/GO:0001707
intermediate filament cytoskeleton	Gene Ontology	GO:0045111	1	28	0.124593	0.212335	EXOSC4	http://amigo.geneontology.org/amigo/term/GO:0045111
kinesin complex	Gene Ontology	GO:0005871	1	28	0.124593	0.212335	KIFC2	http://amigo.geneontology.org/amigo/term/GO:0005871
hormone-mediated signaling pathway	Gene Ontology	GO:0009755	1	28	0.124593	0.212335	THRA	http://amigo.geneontology.org/amigo/term/GO:0009755
negative regulation of transcription, DNA-templated	Gene Ontology	GO:0045892	3	265	0.125077	0.212785	NR1D1|GON4L|SCX	http://amigo.geneontology.org/amigo/term/GO:0045892
focal adhesion	Gene Ontology	GO:0005925	2	133	0.12718	0.215982	ITGB8|PLEC	http://amigo.geneontology.org/amigo/term/GO:0005925
phosphatidylinositol-3,4,5-trisphosphate binding	Gene Ontology	GO:0005547	1	29	0.128603	0.216302	ASAP1	http://amigo.geneontology.org/amigo/term/GO:0005547
beta-tubulin binding	Gene Ontology	GO:0048487	1	29	0.128603	0.216302	SYT11	http://amigo.geneontology.org/amigo/term/GO:0048487
U2-type catalytic step 2 spliceosome	Gene Ontology	GO:0071007	1	29	0.128603	0.216302	PRPF19	http://amigo.geneontology.org/amigo/term/GO:0071007
tRNA methylation	Gene Ontology	GO:0030488	1	29	0.128603	0.216302	METTL2A	http://amigo.geneontology.org/amigo/term/GO:0030488
learning	Gene Ontology	GO:0007612	1	29	0.128603	0.216302	SYT11	http://amigo.geneontology.org/amigo/term/GO:0007612
cytokine activity	Gene Ontology	GO:0005125	2	134	0.128709	0.216302	TNFSF11|BMP3	http://amigo.geneontology.org/amigo/term/GO:0005125
RNA polymerase II cis-regulatory region sequence-specific DNA binding	Gene Ontology	GO:0000978	5	581	0.131893	0.217914	DLX5|DLX6|PLAG1|TP73|THRA	http://amigo.geneontology.org/amigo/term/GO:0000978
RNA binding	Gene Ontology	GO:0003723	4	422	0.132043	0.217914	RPL22|RPS20|CPSF1|MEX3A	http://amigo.geneontology.org/amigo/term/GO:0003723
cellular response to retinoic acid	Gene Ontology	GO:0071300	1	30	0.132594	0.217914	LYN	http://amigo.geneontology.org/amigo/term/GO:0071300
regulation of cell growth	Gene Ontology	GO:0001558	1	30	0.132594	0.217914	LAMTOR2	http://amigo.geneontology.org/amigo/term/GO:0001558
retinol metabolic process	Gene Ontology	GO:0042572	1	30	0.132594	0.217914	DGAT1	http://amigo.geneontology.org/amigo/term/GO:0042572
clathrin binding	Gene Ontology	GO:0030276	1	30	0.132594	0.217914	SYT11	http://amigo.geneontology.org/amigo/term/GO:0030276
mitotic spindle assembly	Gene Ontology	GO:0090307	1	30	0.132594	0.217914	KIFC2	http://amigo.geneontology.org/amigo/term/GO:0090307
positive regulation of protein kinase activity	Gene Ontology	GO:0045860	1	30	0.132594	0.217914	RAP1A	http://amigo.geneontology.org/amigo/term/GO:0045860
adenylate cyclase-inhibiting G protein-coupled receptor signaling pathway	Gene Ontology	GO:0007193	1	30	0.132594	0.217914	PTGDR2	http://amigo.geneontology.org/amigo/term/GO:0007193
I-kappaB kinase/NF-kappaB signaling	Gene Ontology	GO:0007249	1	30	0.132594	0.217914	AZI2	http://amigo.geneontology.org/amigo/term/GO:0007249
cellular response to cAMP	Gene Ontology	GO:0071320	1	30	0.132594	0.217914	RAP1A	http://amigo.geneontology.org/amigo/term/GO:0071320
vesicle fusion	Gene Ontology	GO:0006906	1	30	0.132594	0.217914	SYT11	http://amigo.geneontology.org/amigo/term/GO:0006906
positive regulation of MAP kinase activity	Gene Ontology	GO:0043406	1	31	0.136568	0.221437	FGF1	http://amigo.geneontology.org/amigo/term/GO:0043406
voltage-gated calcium channel activity	Gene Ontology	GO:0005245	1	31	0.136568	0.221437	CACNA1C	http://amigo.geneontology.org/amigo/term/GO:0005245
negative regulation of MAP kinase activity	Gene Ontology	GO:0043407	1	31	0.136568	0.221437	LYN	http://amigo.geneontology.org/amigo/term/GO:0043407
protein tyrosine/serine/threonine phosphatase activity	Gene Ontology	GO:0008138	1	31	0.136568	0.221437	RNGTT	http://amigo.geneontology.org/amigo/term/GO:0008138
lipopolysaccharide-mediated signaling pathway	Gene Ontology	GO:0031663	1	31	0.136568	0.221437	LYN	http://amigo.geneontology.org/amigo/term/GO:0031663
single-stranded RNA binding	Gene Ontology	GO:0003727	1	31	0.136568	0.221437	ENDOV	http://amigo.geneontology.org/amigo/term/GO:0003727
cellular response to transforming growth factor beta stimulus	Gene Ontology	GO:0071560	1	31	0.136568	0.221437	SCX	http://amigo.geneontology.org/amigo/term/GO:0071560
Hsp90 protein binding	Gene Ontology	GO:0051879	1	32	0.140523	0.226333	HSF1	http://amigo.geneontology.org/amigo/term/GO:0051879
negative regulation of phosphoprotein phosphatase activity	Gene Ontology	GO:0032515	1	32	0.140523	0.226333	PPP1R1B	http://amigo.geneontology.org/amigo/term/GO:0032515
regulation of mitotic cell cycle	Gene Ontology	GO:0007346	1	32	0.140523	0.226333	TP73	http://amigo.geneontology.org/amigo/term/GO:0007346
lipopolysaccharide binding	Gene Ontology	GO:0001530	1	32	0.140523	0.226333	PSMB4	http://amigo.geneontology.org/amigo/term/GO:0001530
protein domain specific binding	Gene Ontology	GO:0019904	2	144	0.14423	0.229996	FOXH1|THRA	http://amigo.geneontology.org/amigo/term/GO:0019904
neuron development	Gene Ontology	GO:0048666	1	33	0.14446	0.229996	NEUROD2	http://amigo.geneontology.org/amigo/term/GO:0048666
regulation of phosphoprotein phosphatase activity	Gene Ontology	GO:0043666	1	33	0.14446	0.229996	PPP2R2C	http://amigo.geneontology.org/amigo/term/GO:0043666
chondrocyte differentiation	Gene Ontology	GO:0002062	1	33	0.14446	0.229996	SCX	http://amigo.geneontology.org/amigo/term/GO:0002062
intracellular anatomical structure	Gene Ontology	GO:0005622	1	33	0.14446	0.229996	MYZAP	http://amigo.geneontology.org/amigo/term/GO:0005622
Golgi cisterna membrane	Gene Ontology	GO:0032580	1	33	0.14446	0.229996	HACE1	http://amigo.geneontology.org/amigo/term/GO:0032580
motor activity	Gene Ontology	GO:0003774	1	33	0.14446	0.229996	MYO6	http://amigo.geneontology.org/amigo/term/GO:0003774
positive regulation of phagocytosis	Gene Ontology	GO:0050766	1	34	0.14838	0.234309	CD47	http://amigo.geneontology.org/amigo/term/GO:0050766
outflow tract morphogenesis	Gene Ontology	GO:0003151	1	34	0.14838	0.234309	FOXH1	http://amigo.geneontology.org/amigo/term/GO:0003151
positive regulation of endothelial cell migration	Gene Ontology	GO:0010595	1	34	0.14838	0.234309	FGF1	http://amigo.geneontology.org/amigo/term/GO:0010595
clathrin-coated pit	Gene Ontology	GO:0005905	1	34	0.14838	0.234309	MYO6	http://amigo.geneontology.org/amigo/term/GO:0005905
drug binding	Gene Ontology	GO:0008144	1	34	0.14838	0.234309	PDE4D	http://amigo.geneontology.org/amigo/term/GO:0008144
endoplasmic reticulum	Gene Ontology	GO:0005783	5	607	0.149944	0.236394	HACE1|GRINA|LPGAT1|AMFR|SSR2	http://amigo.geneontology.org/amigo/term/GO:0005783
mRNA binding	Gene Ontology	GO:0003729	2	149	0.152132	0.237755	PUM2|NUDT21	http://amigo.geneontology.org/amigo/term/GO:0003729
retina development in camera-type eye	Gene Ontology	GO:0060041	1	35	0.152281	0.237755	NPHP4	http://amigo.geneontology.org/amigo/term/GO:0060041
protein secretion	Gene Ontology	GO:0009306	1	35	0.152281	0.237755	RAB3C	http://amigo.geneontology.org/amigo/term/GO:0009306
determination of left/right symmetry	Gene Ontology	GO:0007368	1	35	0.152281	0.237755	DAAM2	http://amigo.geneontology.org/amigo/term/GO:0007368
positive regulation of pathway-restricted SMAD protein phosphorylation	Gene Ontology	GO:0010862	1	35	0.152281	0.237755	BMP3	http://amigo.geneontology.org/amigo/term/GO:0010862
cholesterol binding	Gene Ontology	GO:0015485	1	35	0.152281	0.237755	STARD3	http://amigo.geneontology.org/amigo/term/GO:0015485
positive regulation of actin filament polymerization	Gene Ontology	GO:0030838	1	36	0.156165	0.240713	FER	http://amigo.geneontology.org/amigo/term/GO:0030838
positive regulation of tyrosine phosphorylation of STAT protein	Gene Ontology	GO:0042531	1	36	0.156165	0.240713	LYN	http://amigo.geneontology.org/amigo/term/GO:0042531
photoreceptor connecting cilium	Gene Ontology	GO:0032391	1	36	0.156165	0.240713	USH2A	http://amigo.geneontology.org/amigo/term/GO:0032391
fibroblast growth factor receptor signaling pathway	Gene Ontology	GO:0008543	1	36	0.156165	0.240713	FGF1	http://amigo.geneontology.org/amigo/term/GO:0008543
nervous system process	Gene Ontology	GO:0050877	1	36	0.156165	0.240713	GLRA3	http://amigo.geneontology.org/amigo/term/GO:0050877
intermembrane lipid transfer	Gene Ontology	GO:0120009	1	37	0.160031	0.242806	STARD3	http://amigo.geneontology.org/amigo/term/GO:0120009
protein-macromolecule adaptor activity	Gene Ontology	GO:0030674	1	37	0.160031	0.242806	AMFR	http://amigo.geneontology.org/amigo/term/GO:0030674
endoplasmic reticulum unfolded protein response	Gene Ontology	GO:0030968	1	37	0.160031	0.242806	AMFR	http://amigo.geneontology.org/amigo/term/GO:0030968
cytoplasmic translation	Gene Ontology	GO:0002181	1	37	0.160031	0.242806	RPL22	http://amigo.geneontology.org/amigo/term/GO:0002181
brush border	Gene Ontology	GO:0005903	1	37	0.160031	0.242806	PLEC	http://amigo.geneontology.org/amigo/term/GO:0005903
SMAD binding	Gene Ontology	GO:0046332	1	37	0.160031	0.242806	MEF2A	http://amigo.geneontology.org/amigo/term/GO:0046332
scaffold protein binding	Gene Ontology	GO:0097110	1	37	0.160031	0.242806	PDE4D	http://amigo.geneontology.org/amigo/term/GO:0097110
collagen fibril organization	Gene Ontology	GO:0030199	1	37	0.160031	0.242806	SCX	http://amigo.geneontology.org/amigo/term/GO:0030199
actin cytoskeleton	Gene Ontology	GO:0015629	2	156	0.163334	0.245947	FER|NCOA5	http://amigo.geneontology.org/amigo/term/GO:0015629
condensed chromosome kinetochore	Gene Ontology	GO:0000777	1	38	0.16388	0.245947	HSF1	http://amigo.geneontology.org/amigo/term/GO:0000777
protein-containing complex assembly	Gene Ontology	GO:0065003	1	38	0.16388	0.245947	GPAA1	http://amigo.geneontology.org/amigo/term/GO:0065003
negative regulation of I-kappaB kinase/NF-kappaB signaling	Gene Ontology	GO:0043124	1	38	0.16388	0.245947	NR1D1	http://amigo.geneontology.org/amigo/term/GO:0043124
heat shock protein binding	Gene Ontology	GO:0031072	1	38	0.16388	0.245947	HSF1	http://amigo.geneontology.org/amigo/term/GO:0031072
structural constituent of cytoskeleton	Gene Ontology	GO:0005200	1	38	0.16388	0.245947	PLEC	http://amigo.geneontology.org/amigo/term/GO:0005200
immune response	Gene Ontology	GO:0006955	2	158	0.166562	0.248994	TNFSF11|CTSS	http://amigo.geneontology.org/amigo/term/GO:0006955
axon cytoplasm	Gene Ontology	GO:1904115	1	39	0.167711	0.248994	PPP1R1B	http://amigo.geneontology.org/amigo/term/GO:1904115
skeletal muscle cell differentiation	Gene Ontology	GO:0035914	1	39	0.167711	0.248994	SCX	http://amigo.geneontology.org/amigo/term/GO:0035914
peptide binding	Gene Ontology	GO:0042277	1	39	0.167711	0.248994	PTGDR2	http://amigo.geneontology.org/amigo/term/GO:0042277
regulation of translation	Gene Ontology	GO:0006417	1	39	0.167711	0.248994	GEMIN5	http://amigo.geneontology.org/amigo/term/GO:0006417
cortical actin cytoskeleton	Gene Ontology	GO:0030864	1	39	0.167711	0.248994	MYZAP	http://amigo.geneontology.org/amigo/term/GO:0030864
chloride channel activity	Gene Ontology	GO:0005254	1	39	0.167711	0.248994	GLRA3	http://amigo.geneontology.org/amigo/term/GO:0005254
mediator complex	Gene Ontology	GO:0016592	1	40	0.171524	0.251569	MED27	http://amigo.geneontology.org/amigo/term/GO:0016592
myosin complex	Gene Ontology	GO:0016459	1	40	0.171524	0.251569	MYO6	http://amigo.geneontology.org/amigo/term/GO:0016459
clathrin-coated vesicle	Gene Ontology	GO:0030136	1	40	0.171524	0.251569	MYO6	http://amigo.geneontology.org/amigo/term/GO:0030136
Rac GTPase binding	Gene Ontology	GO:0048365	1	40	0.171524	0.251569	HACE1	http://amigo.geneontology.org/amigo/term/GO:0048365
cellular response to mechanical stimulus	Gene Ontology	GO:0071260	1	40	0.171524	0.251569	SCX	http://amigo.geneontology.org/amigo/term/GO:0071260
regulation of inflammatory response	Gene Ontology	GO:0050727	1	40	0.171524	0.251569	LYN	http://amigo.geneontology.org/amigo/term/GO:0050727
negative regulation of protein ubiquitination	Gene Ontology	GO:0031397	1	41	0.175321	0.255973	VPS28	http://amigo.geneontology.org/amigo/term/GO:0031397
promoter-specific chromatin binding	Gene Ontology	GO:1990841	1	41	0.175321	0.255973	HSF1	http://amigo.geneontology.org/amigo/term/GO:1990841
positive regulation of inflammatory response	Gene Ontology	GO:0050729	1	41	0.175321	0.255973	CD47	http://amigo.geneontology.org/amigo/term/GO:0050729
early endosome	Gene Ontology	GO:0005769	2	164	0.17631	0.25703	RASGEF1B|RAP1A	http://amigo.geneontology.org/amigo/term/GO:0005769
cell migration	Gene Ontology	GO:0016477	2	165	0.177944	0.258373	ITGB8|PEAK1	http://amigo.geneontology.org/amigo/term/GO:0016477
cellular response to amino acid stimulus	Gene Ontology	GO:0071230	1	42	0.1791	0.258373	LAMTOR2	http://amigo.geneontology.org/amigo/term/GO:0071230
positive regulation of interferon-gamma production	Gene Ontology	GO:0032729	1	42	0.1791	0.258373	PDE4D	http://amigo.geneontology.org/amigo/term/GO:0032729
ribosome binding	Gene Ontology	GO:0043022	1	42	0.1791	0.258373	GEMIN5	http://amigo.geneontology.org/amigo/term/GO:0043022
SNARE binding	Gene Ontology	GO:0000149	1	42	0.1791	0.258373	SYT11	http://amigo.geneontology.org/amigo/term/GO:0000149
protein destabilization	Gene Ontology	GO:0031648	1	42	0.1791	0.258373	NR1D1	http://amigo.geneontology.org/amigo/term/GO:0031648
transcription regulator complex	Gene Ontology	GO:0005667	2	168	0.182859	0.259927	SCX|MED27	http://amigo.geneontology.org/amigo/term/GO:0005667
stem cell population maintenance	Gene Ontology	GO:0019827	1	43	0.182862	0.259927	MED27	http://amigo.geneontology.org/amigo/term/GO:0019827
filopodium	Gene Ontology	GO:0030175	1	43	0.182862	0.259927	MYO6	http://amigo.geneontology.org/amigo/term/GO:0030175
protein processing	Gene Ontology	GO:0016485	1	43	0.182862	0.259927	CTSS	http://amigo.geneontology.org/amigo/term/GO:0016485
cytosolic small ribosomal subunit	Gene Ontology	GO:0022627	1	43	0.182862	0.259927	RPS20	http://amigo.geneontology.org/amigo/term/GO:0022627
regulation of circadian rhythm	Gene Ontology	GO:0042752	1	43	0.182862	0.259927	NR1D1	http://amigo.geneontology.org/amigo/term/GO:0042752
calcium-dependent phospholipid binding	Gene Ontology	GO:0005544	1	43	0.182862	0.259927	SYT11	http://amigo.geneontology.org/amigo/term/GO:0005544
protein self-association	Gene Ontology	GO:0043621	1	43	0.182862	0.259927	HSF1	http://amigo.geneontology.org/amigo/term/GO:0043621
photoreceptor inner segment	Gene Ontology	GO:0001917	1	43	0.182862	0.259927	USH2A	http://amigo.geneontology.org/amigo/term/GO:0001917
recycling endosome membrane	Gene Ontology	GO:0055038	1	43	0.182862	0.259927	SLC39A4	http://amigo.geneontology.org/amigo/term/GO:0055038
cysteine-type endopeptidase activity	Gene Ontology	GO:0004197	1	44	0.186606	0.262933	CTSS	http://amigo.geneontology.org/amigo/term/GO:0004197
vasculogenesis	Gene Ontology	GO:0001570	1	44	0.186606	0.262933	ITGB8	http://amigo.geneontology.org/amigo/term/GO:0001570
phagocytosis	Gene Ontology	GO:0006909	1	44	0.186606	0.262933	RAB11FIP2	http://amigo.geneontology.org/amigo/term/GO:0006909
nuclear receptor activity	Gene Ontology	GO:0004879	1	44	0.186606	0.262933	THRA	http://amigo.geneontology.org/amigo/term/GO:0004879
heart looping	Gene Ontology	GO:0001947	1	44	0.186606	0.262933	FOXH1	http://amigo.geneontology.org/amigo/term/GO:0001947
actin cytoskeleton reorganization	Gene Ontology	GO:0031532	1	44	0.186606	0.262933	FER	http://amigo.geneontology.org/amigo/term/GO:0031532
extracellular matrix	Gene Ontology	GO:0031012	2	172	0.189443	0.266541	GLG1|FGF1	http://amigo.geneontology.org/amigo/term/GO:0031012
negative regulation of ERK1 and ERK2 cascade	Gene Ontology	GO:0070373	1	45	0.190334	0.267051	LYN	http://amigo.geneontology.org/amigo/term/GO:0070373
cell surface	Gene Ontology	GO:0009986	3	325	0.190357	0.267051	ITGB8|CD47|AJAP1	http://amigo.geneontology.org/amigo/term/GO:0009986
RNA polymerase II transcription factor binding	Gene Ontology	GO:0001085	1	46	0.194045	0.270267	DACT1	http://amigo.geneontology.org/amigo/term/GO:0001085
cytoplasmic ribonucleoprotein granule	Gene Ontology	GO:0036464	1	46	0.194045	0.270267	USP3	http://amigo.geneontology.org/amigo/term/GO:0036464
chromatin organization	Gene Ontology	GO:0006325	1	46	0.194045	0.270267	MOS	http://amigo.geneontology.org/amigo/term/GO:0006325
calcium ion transport	Gene Ontology	GO:0006816	1	47	0.197739	0.273835	CACNA1C	http://amigo.geneontology.org/amigo/term/GO:0006816
negative regulation of transforming growth factor beta receptor signaling pathway	Gene Ontology	GO:0030512	1	47	0.197739	0.273835	GLG1	http://amigo.geneontology.org/amigo/term/GO:0030512
phagocytic vesicle	Gene Ontology	GO:0045335	1	47	0.197739	0.273835	CTSS	http://amigo.geneontology.org/amigo/term/GO:0045335
SMAD protein signal transduction	Gene Ontology	GO:0060395	1	48	0.201416	0.27734	BMP3	http://amigo.geneontology.org/amigo/term/GO:0060395
excitatory postsynaptic potential	Gene Ontology	GO:0060079	1	49	0.205076	0.279991	GLRA3	http://amigo.geneontology.org/amigo/term/GO:0060079
neutrophil chemotaxis	Gene Ontology	GO:0030593	1	49	0.205076	0.279991	PDE4D	http://amigo.geneontology.org/amigo/term/GO:0030593
negative regulation of DNA-binding transcription factor activity	Gene Ontology	GO:0043433	1	49	0.205076	0.279991	FOXH1	http://amigo.geneontology.org/amigo/term/GO:0043433
negative regulation of neuron differentiation	Gene Ontology	GO:0045665	1	49	0.205076	0.279991	HMG20A	http://amigo.geneontology.org/amigo/term/GO:0045665
cellular response to interleukin-1	Gene Ontology	GO:0071347	1	49	0.205076	0.279991	NR1D1	http://amigo.geneontology.org/amigo/term/GO:0071347
site of double-strand break	Gene Ontology	GO:0035861	1	50	0.20872	0.283367	PRPF19	http://amigo.geneontology.org/amigo/term/GO:0035861
endopeptidase activity	Gene Ontology	GO:0004175	1	50	0.20872	0.283367	PSMB4	http://amigo.geneontology.org/amigo/term/GO:0004175
autophagosome	Gene Ontology	GO:0005776	1	50	0.20872	0.283367	UBQLN4	http://amigo.geneontology.org/amigo/term/GO:0005776
protein transport	Gene Ontology	GO:0015031	2	184	0.209375	0.283859	MYO6|RAB25	http://amigo.geneontology.org/amigo/term/GO:0015031
RNA phosphodiester bond hydrolysis, endonucleolytic	Gene Ontology	GO:0090502	1	51	0.212347	0.287083	ENDOV	http://amigo.geneontology.org/amigo/term/GO:0090502
protein homodimerization activity	Gene Ontology	GO:0042803	4	514	0.213588	0.288359	STARD3|NUDT21|NUDT5|RAB11FIP2	http://amigo.geneontology.org/amigo/term/GO:0042803
neurotransmitter receptor activity	Gene Ontology	GO:0030594	1	52	0.215957	0.28994	GLRA3	http://amigo.geneontology.org/amigo/term/GO:0030594
autophagy	Gene Ontology	GO:0006914	1	52	0.215957	0.28994	SYT11	http://amigo.geneontology.org/amigo/term/GO:0006914
memory	Gene Ontology	GO:0007613	1	52	0.215957	0.28994	SYT11	http://amigo.geneontology.org/amigo/term/GO:0007613
molecular adaptor activity	Gene Ontology	GO:0060090	1	52	0.215957	0.28994	LAMTOR2	http://amigo.geneontology.org/amigo/term/GO:0060090
chromatin binding	Gene Ontology	GO:0003682	3	349	0.218544	0.292333	NUDT21|MEF2A|NCOA5	http://amigo.geneontology.org/amigo/term/GO:0003682
magnesium ion binding	Gene Ontology	GO:0000287	2	190	0.219423	0.292333	NUDT5|ENDOV	http://amigo.geneontology.org/amigo/term/GO:0000287
positive regulation of cell growth	Gene Ontology	GO:0030307	1	53	0.219551	0.292333	EXOSC4	http://amigo.geneontology.org/amigo/term/GO:0030307
endoplasmic reticulum-Golgi intermediate compartment	Gene Ontology	GO:0005793	1	53	0.219551	0.292333	MAN1A1	http://amigo.geneontology.org/amigo/term/GO:0005793
sarcolemma	Gene Ontology	GO:0042383	1	53	0.219551	0.292333	PLEC	http://amigo.geneontology.org/amigo/term/GO:0042383
positive regulation of nucleic acid-templated transcription	Gene Ontology	GO:1903508	1	54	0.223129	0.295067	MED27	http://amigo.geneontology.org/amigo/term/GO:1903508
cell cycle arrest	Gene Ontology	GO:0007050	1	54	0.223129	0.295067	TP73	http://amigo.geneontology.org/amigo/term/GO:0007050
ATPase binding	Gene Ontology	GO:0051117	1	54	0.223129	0.295067	PDE4D	http://amigo.geneontology.org/amigo/term/GO:0051117
p53 binding	Gene Ontology	GO:0002039	1	54	0.223129	0.295067	TP73	http://amigo.geneontology.org/amigo/term/GO:0002039
negative regulation of protein binding	Gene Ontology	GO:0032091	1	54	0.223129	0.295067	DACT1	http://amigo.geneontology.org/amigo/term/GO:0032091
cytoplasmic vesicle	Gene Ontology	GO:0031410	2	194	0.226145	0.29734	RAB3C|RAB25	http://amigo.geneontology.org/amigo/term/GO:0031410
GTPase activator activity	Gene Ontology	GO:0005096	2	194	0.226145	0.29734	RGS7|ASAP1	http://amigo.geneontology.org/amigo/term/GO:0005096
positive regulation of neuron differentiation	Gene Ontology	GO:0045666	1	55	0.226691	0.29734	NEUROD2	http://amigo.geneontology.org/amigo/term/GO:0045666
circadian regulation of gene expression	Gene Ontology	GO:0032922	1	55	0.226691	0.29734	NR1D1	http://amigo.geneontology.org/amigo/term/GO:0032922
retrograde transport, endosome to Golgi	Gene Ontology	GO:0042147	1	55	0.226691	0.29734	SNX6	http://amigo.geneontology.org/amigo/term/GO:0042147
canonical Wnt signaling pathway	Gene Ontology	GO:0060070	1	55	0.226691	0.29734	NID2	http://amigo.geneontology.org/amigo/term/GO:0060070
exocytosis	Gene Ontology	GO:0006887	1	56	0.230236	0.300767	RAB25	http://amigo.geneontology.org/amigo/term/GO:0006887
stress fiber	Gene Ontology	GO:0001725	1	56	0.230236	0.300767	DAAM1	http://amigo.geneontology.org/amigo/term/GO:0001725
regulation of transcription, DNA-templated	Gene Ontology	GO:0006355	3	360	0.231745	0.301713	PLAG1|SCRT1|GON4L	http://amigo.geneontology.org/amigo/term/GO:0006355
chemotaxis	Gene Ontology	GO:0006935	1	57	0.233765	0.301713	PTGDR2	http://amigo.geneontology.org/amigo/term/GO:0006935
secretory granule	Gene Ontology	GO:0030141	1	57	0.233765	0.301713	RAB27A	http://amigo.geneontology.org/amigo/term/GO:0030141
B cell differentiation	Gene Ontology	GO:0030183	1	57	0.233765	0.301713	GON4L	http://amigo.geneontology.org/amigo/term/GO:0030183
microtubule organizing center	Gene Ontology	GO:0005815	1	57	0.233765	0.301713	KIFC2	http://amigo.geneontology.org/amigo/term/GO:0005815
mitochondrial large ribosomal subunit	Gene Ontology	GO:0005762	1	57	0.233765	0.301713	MRPL22	http://amigo.geneontology.org/amigo/term/GO:0005762
transforming growth factor beta receptor signaling pathway	Gene Ontology	GO:0007179	1	57	0.233765	0.301713	FOXH1	http://amigo.geneontology.org/amigo/term/GO:0007179
ubiquitin-dependent ERAD pathway	Gene Ontology	GO:0030433	1	57	0.233765	0.301713	AMFR	http://amigo.geneontology.org/amigo/term/GO:0030433
double-strand break repair via homologous recombination	Gene Ontology	GO:0000724	1	58	0.237278	0.304219	TONSL	http://amigo.geneontology.org/amigo/term/GO:0000724
extracellular exosome	Gene Ontology	GO:0070062	1	58	0.237278	0.304219	CD47	http://amigo.geneontology.org/amigo/term/GO:0070062
GDP binding	Gene Ontology	GO:0019003	1	58	0.237278	0.304219	RAP1A	http://amigo.geneontology.org/amigo/term/GO:0019003
lipid droplet	Gene Ontology	GO:0005811	1	59	0.240776	0.307481	PRPF19	http://amigo.geneontology.org/amigo/term/GO:0005811
animal organ morphogenesis	Gene Ontology	GO:0009887	1	59	0.240776	0.307481	FGF1	http://amigo.geneontology.org/amigo/term/GO:0009887
spindle	Gene Ontology	GO:0005819	1	60	0.244257	0.310697	PRPF19	http://amigo.geneontology.org/amigo/term/GO:0005819
motile cilium	Gene Ontology	GO:0031514	1	60	0.244257	0.310697	DAAM1	http://amigo.geneontology.org/amigo/term/GO:0031514
RNA polymerase II transcription regulatory region sequence-specific DNA binding	Gene Ontology	GO:0000977	2	205	0.2447	0.310852	MEF2A|SCRT1	http://amigo.geneontology.org/amigo/term/GO:0000977
T cell receptor signaling pathway	Gene Ontology	GO:0050852	1	61	0.247722	0.313049	PDE4D	http://amigo.geneontology.org/amigo/term/GO:0050852
ruffle	Gene Ontology	GO:0001726	1	61	0.247722	0.313049	MYO6	http://amigo.geneontology.org/amigo/term/GO:0001726
nucleic acid phosphodiester bond hydrolysis	Gene Ontology	GO:0090305	1	61	0.247722	0.313049	EXOSC4	http://amigo.geneontology.org/amigo/term/GO:0090305
chromatin remodeling	Gene Ontology	GO:0006338	1	62	0.251172	0.316581	NUDT5	http://amigo.geneontology.org/amigo/term/GO:0006338
response to lipopolysaccharide	Gene Ontology	GO:0032496	1	62	0.251172	0.316581	FER	http://amigo.geneontology.org/amigo/term/GO:0032496
positive regulation of MAPK cascade	Gene Ontology	GO:0043410	1	63	0.254606	0.319661	MOS	http://amigo.geneontology.org/amigo/term/GO:0043410
phosphatidylinositol-4,5-bisphosphate binding	Gene Ontology	GO:0005546	1	63	0.254606	0.319661	ASAP1	http://amigo.geneontology.org/amigo/term/GO:0005546
post-embryonic development	Gene Ontology	GO:0009791	1	63	0.254606	0.319661	MORC3	http://amigo.geneontology.org/amigo/term/GO:0009791
kinetochore	Gene Ontology	GO:0000776	1	64	0.258024	0.321865	HSF1	http://amigo.geneontology.org/amigo/term/GO:0000776
positive regulation of DNA-binding transcription factor activity	Gene Ontology	GO:0051091	1	64	0.258024	0.321865	NEUROD2	http://amigo.geneontology.org/amigo/term/GO:0051091
ubiquitin ligase complex	Gene Ontology	GO:0000151	1	64	0.258024	0.321865	AMFR	http://amigo.geneontology.org/amigo/term/GO:0000151
ion transmembrane transport	Gene Ontology	GO:0034220	1	64	0.258024	0.321865	GLRA3	http://amigo.geneontology.org/amigo/term/GO:0034220
positive regulation of cold-induced thermogenesis	Gene Ontology	GO:0120162	1	65	0.261427	0.324264	THRA	http://amigo.geneontology.org/amigo/term/GO:0120162
cholesterol homeostasis	Gene Ontology	GO:0042632	1	65	0.261427	0.324264	NR1D1	http://amigo.geneontology.org/amigo/term/GO:0042632
basement membrane	Gene Ontology	GO:0005604	1	65	0.261427	0.324264	NID2	http://amigo.geneontology.org/amigo/term/GO:0005604
glutamatergic synapse	Gene Ontology	GO:0098978	2	215	0.261622	0.324264	RAP1A|RPL22	http://amigo.geneontology.org/amigo/term/GO:0098978
thiol-dependent ubiquitin-specific protease activity	Gene Ontology	GO:0004843	1	66	0.264814	0.327382	USP3	http://amigo.geneontology.org/amigo/term/GO:0004843
SH3 domain binding	Gene Ontology	GO:0017124	1	66	0.264814	0.327382	LYN	http://amigo.geneontology.org/amigo/term/GO:0017124
DNA-binding transcription repressor activity, RNA polymerase II-specific	Gene Ontology	GO:0001227	2	218	0.266703	0.329296	SCRT1|ZFP90	http://amigo.geneontology.org/amigo/term/GO:0001227
chaperone binding	Gene Ontology	GO:0051087	1	67	0.268186	0.329865	AMFR	http://amigo.geneontology.org/amigo/term/GO:0051087
adaptive immune response	Gene Ontology	GO:0002250	1	67	0.268186	0.329865	CTSS	http://amigo.geneontology.org/amigo/term/GO:0002250
melanosome	Gene Ontology	GO:0042470	1	68	0.271542	0.332725	RAB27A	http://amigo.geneontology.org/amigo/term/GO:0042470
phosphatidylinositol binding	Gene Ontology	GO:0035091	1	68	0.271542	0.332725	SNX6	http://amigo.geneontology.org/amigo/term/GO:0035091
regulation of membrane potential	Gene Ontology	GO:0042391	1	68	0.271542	0.332725	GLRA3	http://amigo.geneontology.org/amigo/term/GO:0042391
mitotic spindle	Gene Ontology	GO:0072686	1	69	0.274884	0.335969	KIFC2	http://amigo.geneontology.org/amigo/term/GO:0072686
integrin-mediated signaling pathway	Gene Ontology	GO:0007229	1	69	0.274884	0.335969	ITGB8	http://amigo.geneontology.org/amigo/term/GO:0007229
axoneme	Gene Ontology	GO:0005930	1	70	0.27821	0.338751	CCDC40	http://amigo.geneontology.org/amigo/term/GO:0005930
transmembrane signaling receptor activity	Gene Ontology	GO:0004888	1	72	0.284816	0.345925	GLRA3	http://amigo.geneontology.org/amigo/term/GO:0004888
mitochondrion	Gene Ontology	GO:0005739	5	774	0.285443	0.346252	CMC1|STARD3|PDPR|CYC1|MRPL22	http://amigo.geneontology.org/amigo/term/GO:0005739
endomembrane system	Gene Ontology	GO:0012505	1	73	0.288097	0.348162	LPGAT1	http://amigo.geneontology.org/amigo/term/GO:0012505
positive regulation of protein kinase B signaling	Gene Ontology	GO:0051897	1	73	0.288097	0.348162	TNFSF11	http://amigo.geneontology.org/amigo/term/GO:0051897
mitochondrial inner membrane	Gene Ontology	GO:0005743	2	231	0.288707	0.348465	CYC1|MRPL22	http://amigo.geneontology.org/amigo/term/GO:0005743
regulation of ion transmembrane transport	Gene Ontology	GO:0034765	1	74	0.291363	0.349925	CACNA1C	http://amigo.geneontology.org/amigo/term/GO:0034765
negative regulation of cell migration	Gene Ontology	GO:0030336	1	74	0.291363	0.349925	KANK1	http://amigo.geneontology.org/amigo/term/GO:0030336
negative regulation of inflammatory response	Gene Ontology	GO:0050728	1	74	0.291363	0.349925	NR1D1	http://amigo.geneontology.org/amigo/term/GO:0050728
Golgi organization	Gene Ontology	GO:0007030	1	74	0.291363	0.349925	HACE1	http://amigo.geneontology.org/amigo/term/GO:0007030
transcription by RNA polymerase II	Gene Ontology	GO:0006366	1	75	0.294614	0.352953	THRA	http://amigo.geneontology.org/amigo/term/GO:0006366
Z disc	Gene Ontology	GO:0030018	1	75	0.294614	0.352953	FBXL22	http://amigo.geneontology.org/amigo/term/GO:0030018
chloride transmembrane transport	Gene Ontology	GO:1902476	1	76	0.29785	0.35551	GLRA3	http://amigo.geneontology.org/amigo/term/GO:1902476
small GTPase mediated signal transduction	Gene Ontology	GO:0007264	1	76	0.29785	0.35551	RASGEF1B	http://amigo.geneontology.org/amigo/term/GO:0007264
cellular response to tumor necrosis factor	Gene Ontology	GO:0071356	1	76	0.29785	0.35551	NR1D1	http://amigo.geneontology.org/amigo/term/GO:0071356
guanyl-nucleotide exchange factor activity	Gene Ontology	GO:0005085	1	77	0.301071	0.358471	LAMTOR2	http://amigo.geneontology.org/amigo/term/GO:0005085
transmembrane receptor protein tyrosine kinase signaling pathway	Gene Ontology	GO:0007169	1	78	0.304278	0.3614	LYN	http://amigo.geneontology.org/amigo/term/GO:0007169
protein tyrosine phosphatase activity	Gene Ontology	GO:0004725	1	79	0.30747	0.362523	RNGTT	http://amigo.geneontology.org/amigo/term/GO:0004725
transmembrane transporter activity	Gene Ontology	GO:0022857	1	79	0.30747	0.362523	SLC22A15	http://amigo.geneontology.org/amigo/term/GO:0022857
response to bacterium	Gene Ontology	GO:0009617	1	79	0.30747	0.362523	CD47	http://amigo.geneontology.org/amigo/term/GO:0009617
centriolar satellite	Gene Ontology	GO:0034451	1	80	0.310648	0.365824	NUDT21	http://amigo.geneontology.org/amigo/term/GO:0034451
protein phosphorylation	Gene Ontology	GO:0006468	2	245	0.312323	0.36735	MOS|PRKG2	http://amigo.geneontology.org/amigo/term/GO:0006468
vesicle	Gene Ontology	GO:0031982	1	81	0.313811	0.368652	RAB3C	http://amigo.geneontology.org/amigo/term/GO:0031982
neuron projection development	Gene Ontology	GO:0031175	1	82	0.31696	0.371449	LYN	http://amigo.geneontology.org/amigo/term/GO:0031175
cellular response to leukemia inhibitory factor	Gene Ontology	GO:1990830	1	82	0.31696	0.371449	TNFSF11	http://amigo.geneontology.org/amigo/term/GO:1990830
transcription coregulator activity	Gene Ontology	GO:0003712	1	83	0.320094	0.373147	GON4L	http://amigo.geneontology.org/amigo/term/GO:0003712
synaptic vesicle	Gene Ontology	GO:0008021	1	83	0.320094	0.373147	RAB3C	http://amigo.geneontology.org/amigo/term/GO:0008021
peptidyl-tyrosine phosphorylation	Gene Ontology	GO:0018108	1	83	0.320094	0.373147	PEAK1	http://amigo.geneontology.org/amigo/term/GO:0018108
signal transduction	Gene Ontology	GO:0007165	3	432	0.320704	0.373147	MOS|GLRA3|PDE4D	http://amigo.geneontology.org/amigo/term/GO:0007165
protein heterodimerization activity	Gene Ontology	GO:0046982	2	250	0.320721	0.373147	NEUROD2|HSF1	http://amigo.geneontology.org/amigo/term/GO:0046982
integral component of endoplasmic reticulum membrane	Gene Ontology	GO:0030176	1	84	0.323214	0.375596	AMFR	http://amigo.geneontology.org/amigo/term/GO:0030176
Golgi membrane	Gene Ontology	GO:0000139	2	253	0.325749	0.377393	GLG1|HACE1	http://amigo.geneontology.org/amigo/term/GO:0000139
postsynaptic membrane	Gene Ontology	GO:0045211	1	85	0.32632	0.377393	GLRA3	http://amigo.geneontology.org/amigo/term/GO:0045211
presynapse	Gene Ontology	GO:0098793	1	86	0.329412	0.380061	RPL22	http://amigo.geneontology.org/amigo/term/GO:0098793
negative regulation of apoptotic process	Gene Ontology	GO:0043066	2	256	0.330767	0.381169	SCX|AREL1	http://amigo.geneontology.org/amigo/term/GO:0043066
positive regulation of protein phosphorylation	Gene Ontology	GO:0001934	1	87	0.33249	0.382245	FGF1	http://amigo.geneontology.org/amigo/term/GO:0001934
cellular response to lipopolysaccharide	Gene Ontology	GO:0071222	1	87	0.33249	0.382245	PDE4D	http://amigo.geneontology.org/amigo/term/GO:0071222
intracellular membrane-bounded organelle	Gene Ontology	GO:0043231	2	259	0.335775	0.385107	RAB11FIP2|SPTAN1	http://amigo.geneontology.org/amigo/term/GO:0043231
peptidyl-tyrosine dephosphorylation	Gene Ontology	GO:0035335	1	89	0.338603	0.387432	RNGTT	http://amigo.geneontology.org/amigo/term/GO:0035335
calcium ion transmembrane transport	Gene Ontology	GO:0070588	1	89	0.338603	0.387432	CACNA1C	http://amigo.geneontology.org/amigo/term/GO:0070588
glucose homeostasis	Gene Ontology	GO:0042593	1	91	0.344661	0.393434	NCOA5	http://amigo.geneontology.org/amigo/term/GO:0042593
positive regulation of transcription, DNA-templated	Gene Ontology	GO:0045893	2	266	0.347417	0.396113	NR1D1|SCX	http://amigo.geneontology.org/amigo/term/GO:0045893
protein homooligomerization	Gene Ontology	GO:0051260	1	96	0.359566	0.408042	GLRA3	http://amigo.geneontology.org/amigo/term/GO:0051260
transcription regulatory region sequence-specific DNA binding	Gene Ontology	GO:0000976	1	97	0.362506	0.410416	FOXH1	http://amigo.geneontology.org/amigo/term/GO:0000976
zinc ion binding	Gene Ontology	GO:0008270	4	664	0.365609	0.413445	MORC3|USP3|THRA|NR1D1	http://amigo.geneontology.org/amigo/term/GO:0008270
ribonucleoprotein complex	Gene Ontology	GO:1990904	1	99	0.368346	0.416055	HSF1	http://amigo.geneontology.org/amigo/term/GO:1990904
adherens junction	Gene Ontology	GO:0005912	1	100	0.371247	0.418842	AJAP1	http://amigo.geneontology.org/amigo/term/GO:0005912
microtubule cytoskeleton organization	Gene Ontology	GO:0000226	1	101	0.374134	0.421608	FER	http://amigo.geneontology.org/amigo/term/GO:0000226
centriole	Gene Ontology	GO:0005814	1	102	0.377008	0.422878	CEP104	http://amigo.geneontology.org/amigo/term/GO:0005814
ubiquitin-protein transferase activity	Gene Ontology	GO:0004842	1	105	0.385551	0.430962	HACE1	http://amigo.geneontology.org/amigo/term/GO:0004842
structural molecule activity	Gene Ontology	GO:0005198	1	105	0.385551	0.430962	PLEC	http://amigo.geneontology.org/amigo/term/GO:0005198
positive regulation of I-kappaB kinase/NF-kappaB signaling	Gene Ontology	GO:0043123	1	107	0.391182	0.436249	TNFSF11	http://amigo.geneontology.org/amigo/term/GO:0043123
vesicle-mediated transport	Gene Ontology	GO:0016192	1	107	0.391182	0.436249	SYT11	http://amigo.geneontology.org/amigo/term/GO:0016192
cilium	Gene Ontology	GO:0005929	1	108	0.393978	0.438862	CEP104	http://amigo.geneontology.org/amigo/term/GO:0005929
oxidoreductase activity	Gene Ontology	GO:0016491	1	109	0.396762	0.440947	PDPR	http://amigo.geneontology.org/amigo/term/GO:0016491
regulation of cell population proliferation	Gene Ontology	GO:0042127	1	109	0.396762	0.440947	LYN	http://amigo.geneontology.org/amigo/term/GO:0042127
protein kinase activity	Gene Ontology	GO:0004672	1	110	0.399532	0.443518	MOS	http://amigo.geneontology.org/amigo/term/GO:0004672
cell cycle	Gene Ontology	GO:0007049	1	111	0.402291	0.446068	HACE1	http://amigo.geneontology.org/amigo/term/GO:0007049
mRNA splicing, via spliceosome	Gene Ontology	GO:0000398	1	112	0.405036	0.448598	PRPF19	http://amigo.geneontology.org/amigo/term/GO:0000398
protein autophosphorylation	Gene Ontology	GO:0046777	1	113	0.407769	0.45008	PEAK1	http://amigo.geneontology.org/amigo/term/GO:0046777
heme binding	Gene Ontology	GO:0020037	1	114	0.41049	0.451953	CYC1	http://amigo.geneontology.org/amigo/term/GO:0020037
calmodulin binding	Gene Ontology	GO:0005516	1	114	0.41049	0.451953	MYO6	http://amigo.geneontology.org/amigo/term/GO:0005516
protein kinase binding	Gene Ontology	GO:0019901	2	305	0.410866	0.451953	RAB11FIP2|TP73	http://amigo.geneontology.org/amigo/term/GO:0019901
basolateral plasma membrane	Gene Ontology	GO:0016323	1	117	0.418577	0.459391	AJAP1	http://amigo.geneontology.org/amigo/term/GO:0016323
carbohydrate binding	Gene Ontology	GO:0030246	1	117	0.418577	0.459391	KLRB1	http://amigo.geneontology.org/amigo/term/GO:0030246
peptidyl-serine phosphorylation	Gene Ontology	GO:0018105	1	118	0.421249	0.461799	MORC3	http://amigo.geneontology.org/amigo/term/GO:0018105
membrane raft	Gene Ontology	GO:0045121	1	123	0.434424	0.473561	LYN	http://amigo.geneontology.org/amigo/term/GO:0045121
postsynaptic density	Gene Ontology	GO:0014069	1	124	0.437023	0.475324	SYT11	http://amigo.geneontology.org/amigo/term/GO:0014069
lamellipodium	Gene Ontology	GO:0030027	1	124	0.437023	0.475324	FER	http://amigo.geneontology.org/amigo/term/GO:0030027
cell-cell junction	Gene Ontology	GO:0005911	1	125	0.43961	0.477065	NPHP4	http://amigo.geneontology.org/amigo/term/GO:0005911
midbody	Gene Ontology	GO:0030496	1	126	0.442185	0.479323	RASGEF1B	http://amigo.geneontology.org/amigo/term/GO:0030496
protein stabilization	Gene Ontology	GO:0050821	1	128	0.447301	0.483245	MORC3	http://amigo.geneontology.org/amigo/term/GO:0050821
iron ion binding	Gene Ontology	GO:0005506	1	128	0.447301	0.483245	OGFOD1	http://amigo.geneontology.org/amigo/term/GO:0005506
trans-Golgi network	Gene Ontology	GO:0005802	1	128	0.447301	0.483245	SYT11	http://amigo.geneontology.org/amigo/term/GO:0005802
lysosomal membrane	Gene Ontology	GO:0005765	1	129	0.449841	0.485447	LAMTOR2	http://amigo.geneontology.org/amigo/term/GO:0005765
defense response to virus	Gene Ontology	GO:0051607	1	130	0.45237	0.487633	EXOSC4	http://amigo.geneontology.org/amigo/term/GO:0051607
endocytosis	Gene Ontology	GO:0006897	1	132	0.457393	0.491405	MYO6	http://amigo.geneontology.org/amigo/term/GO:0006897
cilium assembly	Gene Ontology	GO:0060271	1	132	0.457393	0.491405	ASAP1	http://amigo.geneontology.org/amigo/term/GO:0060271
positive regulation of ERK1 and ERK2 cascade	Gene Ontology	GO:0070374	1	134	0.46237	0.494557	RAP1A	http://amigo.geneontology.org/amigo/term/GO:0070374
angiogenesis	Gene Ontology	GO:0001525	1	136	0.467302	0.499281	FGF1	http://amigo.geneontology.org/amigo/term/GO:0001525
regulation of transcription by RNA polymerase II	Gene Ontology	GO:0006357	3	557	0.473805	0.504558	DLX5|DLX6|MED27	http://amigo.geneontology.org/amigo/term/GO:0006357
regulation of gene expression	Gene Ontology	GO:0010468	1	140	0.477031	0.505215	HMG20A	http://amigo.geneontology.org/amigo/term/GO:0010468
mitochondrial matrix	Gene Ontology	GO:0005759	1	144	0.486584	0.514769	PDPR	http://amigo.geneontology.org/amigo/term/GO:0005759
enzyme binding	Gene Ontology	GO:0019899	1	147	0.493635	0.521089	CPSF1	http://amigo.geneontology.org/amigo/term/GO:0019899
receptor complex	Gene Ontology	GO:0043235	1	155	0.511971	0.536932	GRM7	http://amigo.geneontology.org/amigo/term/GO:0043235
neuronal cell body	Gene Ontology	GO:0043025	1	156	0.514216	0.538703	PPP1R1B	http://amigo.geneontology.org/amigo/term/GO:0043025
ATPase activity	Gene Ontology	GO:0016887	1	159	0.520891	0.543929	KIFC2	http://amigo.geneontology.org/amigo/term/GO:0016887
transcription coactivator activity	Gene Ontology	GO:0003713	1	163	0.529648	0.552478	MED27	http://amigo.geneontology.org/amigo/term/GO:0003713
DNA-binding transcription factor activity, RNA polymerase II-specific	Gene Ontology	GO:0000981	2	389	0.536056	0.55736	DLX6|MEF2A	http://amigo.geneontology.org/amigo/term/GO:0000981
microtubule	Gene Ontology	GO:0005874	1	167	0.538247	0.559037	KIFC2	http://amigo.geneontology.org/amigo/term/GO:0005874
transcription factor binding	Gene Ontology	GO:0008134	1	169	0.542487	0.562838	TP73	http://amigo.geneontology.org/amigo/term/GO:0008134
signaling receptor binding	Gene Ontology	GO:0005102	1	171	0.546689	0.565984	LYN	http://amigo.geneontology.org/amigo/term/GO:0005102
axon	Gene Ontology	GO:0030424	1	173	0.550853	0.569078	SYT11	http://amigo.geneontology.org/amigo/term/GO:0030424
actin filament binding	Gene Ontology	GO:0051015	1	173	0.550853	0.569078	MYO6	http://amigo.geneontology.org/amigo/term/GO:0051015
microtubule binding	Gene Ontology	GO:0008017	1	188	0.580894	0.599473	KIFC2	http://amigo.geneontology.org/amigo/term/GO:0008017
cytoskeleton	Gene Ontology	GO:0005856	1	190	0.584746	0.602164	KANK1	http://amigo.geneontology.org/amigo/term/GO:0005856
inflammatory response	Gene Ontology	GO:0006954	1	190	0.584746	0.602164	CD47	http://amigo.geneontology.org/amigo/term/GO:0006954
apical plasma membrane	Gene Ontology	GO:0016324	1	192	0.588562	0.60545	USH2A	http://amigo.geneontology.org/amigo/term/GO:0016324
cell adhesion	Gene Ontology	GO:0007155	1	198	0.599805	0.615054	CD47	http://amigo.geneontology.org/amigo/term/GO:0007155
extracellular region	Gene Ontology	GO:0005576	2	454	0.619782	0.633526	FGF1|CCDC40	http://amigo.geneontology.org/amigo/term/GO:0005576
ubiquitin protein ligase binding	Gene Ontology	GO:0031625	1	213	0.626594	0.639813	SYT11	http://amigo.geneontology.org/amigo/term/GO:0031625
protein serine/threonine kinase activity	Gene Ontology	GO:0004674	1	214	0.628315	0.640895	MOS	http://amigo.geneontology.org/amigo/term/GO:0004674
apoptotic process	Gene Ontology	GO:0006915	1	216	0.631734	0.643704	MEF2A	http://amigo.geneontology.org/amigo/term/GO:0006915
intracellular protein transport	Gene Ontology	GO:0006886	1	220	0.638479	0.649892	SNX6	http://amigo.geneontology.org/amigo/term/GO:0006886
transmembrane transport	Gene Ontology	GO:0055085	1	221	0.640146	0.650076	SLC22A15	http://amigo.geneontology.org/amigo/term/GO:0055085
integral component of membrane	Gene Ontology	GO:0016021	16	3697	0.640566	0.650076	XKR4|TNFSF11|KLRB1|TMEM249|USH2A|DNAH3|DGAT1|GRINA|SLC22A15|CYC1|GLG1|SSR2|PRTG|STARD3|LPGAT1|MAN1A1	http://amigo.geneontology.org/amigo/term/GO:0016021
extracellular space	Gene Ontology	GO:0005615	4	952	0.640674	0.650076	TNFSF11|CTSS|BMP3|FGF1	http://amigo.geneontology.org/amigo/term/GO:0005615
innate immune response	Gene Ontology	GO:0045087	1	225	0.646738	0.655541	LYN	http://amigo.geneontology.org/amigo/term/GO:0045087
oxidation-reduction process	Gene Ontology	GO:0055114	2	516	0.688446	0.694183	PDPR|OGFOD1	http://amigo.geneontology.org/amigo/term/GO:0055114
protein-containing complex	Gene Ontology	GO:0032991	1	291	0.739711	0.745099	LYN	http://amigo.geneontology.org/amigo/term/GO:0032991
plasma membrane	Gene Ontology	GO:0005886	8	2339	0.850785	0.855202	DAAM1|VPS28|RGS7|RAP1A|NID2|SYT11|RAB3C|PRTG	http://amigo.geneontology.org/amigo/term/GO:0005886
membrane	Gene Ontology	GO:0016020	1	482	0.892879	0.896584	PLEC	http://amigo.geneontology.org/amigo/term/GO:0016020
G protein-coupled receptor activity	Gene Ontology	GO:0004930	1	664	0.954286	0.956261	PTGDR2	http://amigo.geneontology.org/amigo/term/GO:0004930
G protein-coupled receptor signaling pathway	Gene Ontology	GO:0007186	1	736	0.967409	0.96841	RGS7	http://amigo.geneontology.org/amigo/term/GO:0007186

## Sheet: Table S9
Table S9. QTLs Overlapped with Candidate Selected Regions
Chromosome	QTL traits	QTL start site(bp)	QTL end site (bp)	QTL information
Chr.1	Exterior_QTL	23585281	59475926	QTL_ID=3428;Name=Rump angle;Abbrev=RANG;PUBMED_ID=12605852;trait_ID=1138;trait=Rump angle;Coord_src=cM;FlankMarker=BM4307;VTO_name=rump angle;Map_Type=Linkage;P-value=0.0015
Chr.1	Meat_and_Carcass_QTL	24549201	94402650	QTL_ID=12199;Name=Oleic acid content;Abbrev=FA-C18:1;PUBMED_ID=20477785;trait_ID=1105;trait=Oleic acid content;Coord_src=cM;FlankMarker=BMS711;breed=jersey,limousin;PTO_name=meat fatty acid cis-9-C18:1 content;Map_Type=Linkage;Model=Mendelian;Test_Base=Genome-wise;Significance=Suggestive;P-value=<0.10
Chr.1	Health_QTL	31778602	62808628	QTL_ID=10506;Name=Initial packed red blood cell volume;Abbrev=PCVI;PUBMED_ID=12805560;trait_ID=1013;trait=Initial packed red blood cell volume;Coord_src=cM;FlankMarker=ILSTS104,DIK024;breed=boran,n'dama;CMO_name=hematocrit;Map_Type=Linkage;Model=Mendelian;Test_Base=Chromosome-wise;Significance=Significant;LOD-score=4.09;P-value=0.0001;Variance=14.3;Additive_Effect=-11.50
Chr.1	Exterior_QTL	39049021	53876985	QTL_ID=3579;Name=Structural soundness (legs, feet, penis, and prepuce);Abbrev=SOUND;PUBMED_ID=17183116;trait_ID=1082;trait=Structural soundness (legs, feet, penis, and prepuce);Coord_src=cM;FlankMarker=BMS4017,BMS4000;VTO_name=body conformation trait;Map_Type=Linkage;Significance=Significant;P-value=<0.05
Chr.1	Reproduction_QTL	39049021	77739137	QTL_ID=11319;Name=Fertility treatments;Abbrev=FERTRT;PUBMED_ID=19841231;trait_ID=1277;trait=Fertility treatments;Coord_src=cM;FlankMarker=BMS4017,INRA049;breed=holstein;VTO_name=female fertility trait;Map_Type=Linkage;Model=Mendelian;Test_Base=Chromosome-wise;Significance=Significant;P-value=0.041;F-Stat=1.97
Chr.1	Milk_QTL	39416131	61793436	QTL_ID=2502;Name=Milk protein yield;Abbrev=PY;PUBMED_ID=11178740;trait_ID=1042;trait=Milk protein yield;Coord_src=cM;FlankMarker=BM4307,INRA011;VTO_name=milk protein amount;PTO_name=milk protein yield;CMO_name=milk protein yield;Map_Type=Linkage;Significance=Significant;P-value=<0.05
Chr.1	Reproduction_QTL	50246903	102544700	QTL_ID=3439;Name=Conception rate;Abbrev=CONCRATE;PUBMED_ID=12605852;trait_ID=1075;trait=Conception rate;Coord_src=cM;FlankMarker=INRA073;VTO_name=fertility trait;Map_Type=Linkage;P-value=0.005
Chr.1	Meat_and_Carcass_QTL	52308051	78446695	QTL_ID=12226;Name=Linoleic acid content;Abbrev=FA-C18:2;PUBMED_ID=20416790;trait_ID=1187;trait=Linoleic acid content;Coord_src=cM;FlankMarker=TGLA57,INRA128;breed=charolais,holstein;PTO_name=meat fatty acid cis-9,cis-12-C18:2 content;Map_Type=Linkage;Model=Mendelian;Test_Base=Genome-wise;Significance=Significant;P-value=0.042;F-Stat=8.78;Variance=7.76;Dominance_Effect=0.089;Additive_Effect=-0.009
Chr.1	Production_QTL	52308051	64039165	QTL_ID=10640;Name=Body weight (mature);Abbrev=MWT;PUBMED_ID=20477797;trait_ID=1271;trait=Body weight (mature);Coord_src=cM;FlankMarker=TGLA57,TGLA57,BMS527;breed=Angus;VTO_name=body mass;CMO_name=body weight;Map_Type=Linkage;Model=Mendelian;Test_Base=Chromosome-wise;Significance=Significant;P-value=0.000501187234;Dominance_Effect=0.0071
Chr.1	Milk_QTL	60296283	144690571	QTL_ID=21533;Name=Milk alpha-casein percentage;Abbrev=MACASP;PUBMED_ID=19397519;trait_ID=1386;trait=Milk alpha-casein percentage;Coord_src=cM;breed=holstein;VTO_name=milk alpha-casein amount;PTO_name=milk alpha-casein content;CMO_name=milk alpha-casein percentage;Map_Type=Linkage;Model=-;Test_Base=Genome-wise;Significance=Significant;P-value=0.012;F-Stat=4.63
Chr.1	Health_QTL	67679502	112799170	QTL_ID=9947;Name=Infectious bovine keratoconjunctivitis susceptibility;Abbrev=IBK;PUBMED_ID=17093209;trait_ID=1245;trait=Infectious bovine keratoconjunctivitis susceptibility;Coord_src=cM;CMO_name=disease process measurement;Map_Type=Linkage;Model=Mendelian;Test_Base=Comparison-wise;Significance=Significant;P-value=0.0015;F-Stat=10.15
Chr.1	Reproduction_QTL	78446695	125412168	QTL_ID=5658;Name=Non-return rate;Abbrev=NRR;PUBMED_ID=18717969;trait_ID=1148;trait=Non-return rate;Coord_src=cM;FlankMarker=INRA073,BM1824;breed=holstein;VTO_name=fertility trait;Map_Type=Linkage;Model=Mendelian;Test_Base=Chromosome-wise;Significance=Significant;P-value=<0.01;Variance=18.0;Additive_Effect=4.86
Chr.1	Milk_QTL	79656722	125412168	QTL_ID=2508;Name=Milk protein yield;Abbrev=PY;PUBMED_ID=11178740;trait_ID=1042;trait=Milk protein yield;Coord_src=cM;FlankMarker=BM6506,BM1824;VTO_name=milk protein amount;PTO_name=milk protein yield;CMO_name=milk protein yield;Map_Type=Linkage;Significance=Significant;P-value=<0.05
Chr.1	Reproduction_QTL	93633565	110645731	QTL_ID=5659;Name=Non-return rate;Abbrev=NRR;PUBMED_ID=18717969;trait_ID=1148;trait=Non-return rate;Coord_src=cM;FlankMarker=DIK4587,BMS4028;breed=holstein;VTO_name=fertility trait;Map_Type=Linkage;Model=Mendelian;Test_Base=Chromosome-wise;Significance=Significant;P-value=<0.05
Chr.1	Milk_QTL	101673070	125104534	QTL_ID=2582;Name=Milk yield;Abbrev=MY;PUBMED_ID=12778594;trait_ID=1044;trait=Milk yield;Coord_src=cM;FlankMarker=CSSM032,CSSM019;VTO_name=milk amount;CMO_name=milk yield;Map_Type=Linkage;Significance=Significant;P-value=<0.0029;F-Stat=4.76
Chr.1	Meat_and_Carcass_QTL	102247320	125104534	QTL_ID=4819;Name=Intramuscular fat;Abbrev=EEF;PUBMED_ID=18254735;trait_ID=1103;trait=Intramuscular fat;Coord_src=cM;FlankMarker=BM864,CSSM019;VTO_name=intramuscular adipose amount;PTO_name=intramuscular fat content;Map_Type=Linkage;Model=Mendelian;Test_Base=Chromosome-wise;Significance=Significant;P-value=0.0127;F-Stat=6.61;Dominance_Effect=0.31;Additive_Effect=0.02
Chr.1	Production_QTL	102247320	114132251	QTL_ID=10645;Name=Body weight (weaning);Abbrev=WWT;PUBMED_ID=20477797;trait_ID=1063;trait=Body weight (weaning);Coord_src=cM;FlankMarker=BM864,BM864,BMS4040;breed=Angus;VTO_name=body mass;CMO_name=body weight;Map_Type=Linkage;Model=Mendelian;Test_Base=Chromosome-wise;Significance=Significant;P-value=0.001288249552;Bayes-value=2;Dominance_Effect=0.1205
Chr.1	Production_QTL	102544700	114132251	QTL_ID=1450;Name=Chest width;Abbrev=CHWDT;PUBMED_ID=ISU0026;trait_ID=1115;trait=Chest width;Coord_src=cM;FlankMarker=BMS119,BMS4019;VTO_name=chest width;Map_Type=Linkage;Significance=Significant;P-value=<0.05;F-Stat=10.05;Additive_Effect=5.3
Chr.1	Production_QTL	102544700	138435345	QTL_ID=1320;Name=Body weight (birth);Abbrev=BW;PUBMED_ID=14677852;trait_ID=1054;trait=Body weight (birth);Coord_src=cM;VTO_name=body mass;CMO_name=body weight;Map_Type=Linkage;F-Stat=10.9;Additive_Effect=2.59
Chr.1	Production_QTL	125412168	151971245	QTL_ID=10647;Name=Body weight (weaning);Abbrev=WWT;PUBMED_ID=20477797;trait_ID=1063;trait=Body weight (weaning);Coord_src=cM;FlankMarker=BM1824,BM1824,BMS4014;breed=Angus;VTO_name=body mass;CMO_name=body weight;Map_Type=Linkage;Model=Mendelian;Test_Base=Genome-wise;Significance=Significant;P-value=0.000288403150;Bayes-value=22;Dominance_Effect=0.1196
Chr.1	Production_QTL	125412168	151971245	QTL_ID=10647;Name=Body weight (weaning);Abbrev=WWT;PUBMED_ID=20477797;trait_ID=1063;trait=Body weight (weaning);Coord_src=cM;FlankMarker=BM1824,BM1824,BMS4014;breed=Angus;VTO_name=body mass;CMO_name=body weight;Map_Type=Linkage;Model=Mendelian;Test_Base=Genome-wise;Significance=Significant;P-value=0.000288403150;Bayes-value=22;Dominance_Effect=0.1196
Chr.1	Milk_QTL	130641947	151971245	QTL_ID=1513;Name=Milk fat yield;Abbrev=FY;PUBMED_ID=16533362;trait_ID=1039;trait=Milk fat yield;Coord_src=cM;FlankMarker=BM3205,BMS922;VTO_name=milk fat amount;PTO_name=milk fat yield;CMO_name=milk fat yield;Map_Type=Linkage;Significance=Significant;P-value=0.03
Chr.1	Milk_QTL	130641947	151971245	QTL_ID=1513;Name=Milk fat yield;Abbrev=FY;PUBMED_ID=16533362;trait_ID=1039;trait=Milk fat yield;Coord_src=cM;FlankMarker=BM3205,BMS922;VTO_name=milk fat amount;PTO_name=milk fat yield;CMO_name=milk fat yield;Map_Type=Linkage;Significance=Significant;P-value=0.03
Chr.1	Meat_and_Carcass_QTL	142844767	158534106	QTL_ID=10651;Name=Carcass weight;Abbrev=CWT;PUBMED_ID=20477797;trait_ID=1022;trait=Carcass weight;Coord_src=cM;FlankMarker=BMS599,BMS4014,#;breed=Angus;PTO_name=dressed carcass weight;CMO_name=carcass weight;Map_Type=Linkage;Model=Mendelian;Test_Base=Genome-wise;Significance=Significant;P-value=0.000020417379;Bayes-value=6;Dominance_Effect=0.0132
Chr.1	Meat_and_Carcass_QTL	142844767	158534106	QTL_ID=10651;Name=Carcass weight;Abbrev=CWT;PUBMED_ID=20477797;trait_ID=1022;trait=Carcass weight;Coord_src=cM;FlankMarker=BMS599,BMS4014,#;breed=Angus;PTO_name=dressed carcass weight;CMO_name=carcass weight;Map_Type=Linkage;Model=Mendelian;Test_Base=Genome-wise;Significance=Significant;P-value=0.000020417379;Bayes-value=6;Dominance_Effect=0.0132
Chr.1	Milk_QTL	145818563	158534106	QTL_ID=16060;Name=Milk fat percentage;Abbrev=FP;PUBMED_ID=21117339;trait_ID=1037;trait=Milk fat percentage;Coord_src=cM;FlankMarker=BMS4043,DIK4443;breed=jersey;VTO_name=milk fat amount;PTO_name=milk fat content;CMO_name=milk fat percentage;Map_Type=Linkage;Model=Mendelian;Test_Base=Chromosome-wise;Significance=Significant;P-value=0.0272
Chr.1	Milk_QTL	145818563	158534106	QTL_ID=16060;Name=Milk fat percentage;Abbrev=FP;PUBMED_ID=21117339;trait_ID=1037;trait=Milk fat percentage;Coord_src=cM;FlankMarker=BMS4043,DIK4443;breed=jersey;VTO_name=milk fat amount;PTO_name=milk fat content;CMO_name=milk fat percentage;Map_Type=Linkage;Model=Mendelian;Test_Base=Chromosome-wise;Significance=Significant;P-value=0.0272
Chr.3	Health_QTL	0	55767592	QTL_ID=2490;Name=Somatic cell count;Abbrev=SCC;PUBMED_ID=11845286;trait_ID=1004;trait=Somatic cell count;Coord_src=cM;FlankMarker=BMS871,INRA003;VTO_name=milk somatic cell quantity;PTO_name=milk somatic cell count;CMO_name=milk somatic cell count;Map_Type=Linkage;Significance=Significant
Chr.3	Health_QTL	0	55767592	QTL_ID=2490;Name=Somatic cell count;Abbrev=SCC;PUBMED_ID=11845286;trait_ID=1004;trait=Somatic cell count;Coord_src=cM;FlankMarker=BMS871,INRA003;VTO_name=milk somatic cell quantity;PTO_name=milk somatic cell count;CMO_name=milk somatic cell count;Map_Type=Linkage;Significance=Significant
Chr.3	Health_QTL	0	55767592	QTL_ID=2490;Name=Somatic cell count;Abbrev=SCC;PUBMED_ID=11845286;trait_ID=1004;trait=Somatic cell count;Coord_src=cM;FlankMarker=BMS871,INRA003;VTO_name=milk somatic cell quantity;PTO_name=milk somatic cell count;CMO_name=milk somatic cell count;Map_Type=Linkage;Significance=Significant
Chr.3	Health_QTL	0	55767592	QTL_ID=2490;Name=Somatic cell count;Abbrev=SCC;PUBMED_ID=11845286;trait_ID=1004;trait=Somatic cell count;Coord_src=cM;FlankMarker=BMS871,INRA003;VTO_name=milk somatic cell quantity;PTO_name=milk somatic cell count;CMO_name=milk somatic cell count;Map_Type=Linkage;Significance=Significant
Chr.3	Health_QTL	0	55767592	QTL_ID=2490;Name=Somatic cell count;Abbrev=SCC;PUBMED_ID=11845286;trait_ID=1004;trait=Somatic cell count;Coord_src=cM;FlankMarker=BMS871,INRA003;VTO_name=milk somatic cell quantity;PTO_name=milk somatic cell count;CMO_name=milk somatic cell count;Map_Type=Linkage;Significance=Significant
Chr.3	Health_QTL	0	55767592	QTL_ID=2490;Name=Somatic cell count;Abbrev=SCC;PUBMED_ID=11845286;trait_ID=1004;trait=Somatic cell count;Coord_src=cM;FlankMarker=BMS871,INRA003;VTO_name=milk somatic cell quantity;PTO_name=milk somatic cell count;CMO_name=milk somatic cell count;Map_Type=Linkage;Significance=Significant
Chr.3	Health_QTL	0	55767592	QTL_ID=2490;Name=Somatic cell count;Abbrev=SCC;PUBMED_ID=11845286;trait_ID=1004;trait=Somatic cell count;Coord_src=cM;FlankMarker=BMS871,INRA003;VTO_name=milk somatic cell quantity;PTO_name=milk somatic cell count;CMO_name=milk somatic cell count;Map_Type=Linkage;Significance=Significant
Chr.3	Health_QTL	0	55767592	QTL_ID=2490;Name=Somatic cell count;Abbrev=SCC;PUBMED_ID=11845286;trait_ID=1004;trait=Somatic cell count;Coord_src=cM;FlankMarker=BMS871,INRA003;VTO_name=milk somatic cell quantity;PTO_name=milk somatic cell count;CMO_name=milk somatic cell count;Map_Type=Linkage;Significance=Significant
Chr.3	Meat_and_Carcass_QTL	0	39458202	QTL_ID=1324;Name=Marbling score;Abbrev=MARBL;PUBMED_ID=14677852;trait_ID=1027;trait=Marbling score;Coord_src=cM;VTO_name=intramuscular adipose amount;PTO_name=intramuscular fat content;Map_Type=Linkage;F-Stat=12.2;Additive_Effect=-20.14
Chr.3	Meat_and_Carcass_QTL	0	39458202	QTL_ID=1324;Name=Marbling score;Abbrev=MARBL;PUBMED_ID=14677852;trait_ID=1027;trait=Marbling score;Coord_src=cM;VTO_name=intramuscular adipose amount;PTO_name=intramuscular fat content;Map_Type=Linkage;F-Stat=12.2;Additive_Effect=-20.14
Chr.3	Meat_and_Carcass_QTL	0	39458202	QTL_ID=1324;Name=Marbling score;Abbrev=MARBL;PUBMED_ID=14677852;trait_ID=1027;trait=Marbling score;Coord_src=cM;VTO_name=intramuscular adipose amount;PTO_name=intramuscular fat content;Map_Type=Linkage;F-Stat=12.2;Additive_Effect=-20.14
Chr.3	Meat_and_Carcass_QTL	0	39458202	QTL_ID=1324;Name=Marbling score;Abbrev=MARBL;PUBMED_ID=14677852;trait_ID=1027;trait=Marbling score;Coord_src=cM;VTO_name=intramuscular adipose amount;PTO_name=intramuscular fat content;Map_Type=Linkage;F-Stat=12.2;Additive_Effect=-20.14
Chr.3	Meat_and_Carcass_QTL	0	39458202	QTL_ID=1324;Name=Marbling score;Abbrev=MARBL;PUBMED_ID=14677852;trait_ID=1027;trait=Marbling score;Coord_src=cM;VTO_name=intramuscular adipose amount;PTO_name=intramuscular fat content;Map_Type=Linkage;F-Stat=12.2;Additive_Effect=-20.14
Chr.3	Meat_and_Carcass_QTL	0	39458202	QTL_ID=1324;Name=Marbling score;Abbrev=MARBL;PUBMED_ID=14677852;trait_ID=1027;trait=Marbling score;Coord_src=cM;VTO_name=intramuscular adipose amount;PTO_name=intramuscular fat content;Map_Type=Linkage;F-Stat=12.2;Additive_Effect=-20.14
Chr.3	Meat_and_Carcass_QTL	0	39458202	QTL_ID=1324;Name=Marbling score;Abbrev=MARBL;PUBMED_ID=14677852;trait_ID=1027;trait=Marbling score;Coord_src=cM;VTO_name=intramuscular adipose amount;PTO_name=intramuscular fat content;Map_Type=Linkage;F-Stat=12.2;Additive_Effect=-20.14
Chr.3	Meat_and_Carcass_QTL	0	39458202	QTL_ID=1324;Name=Marbling score;Abbrev=MARBL;PUBMED_ID=14677852;trait_ID=1027;trait=Marbling score;Coord_src=cM;VTO_name=intramuscular adipose amount;PTO_name=intramuscular fat content;Map_Type=Linkage;F-Stat=12.2;Additive_Effect=-20.14
Chr.3	Reproduction_QTL	0	27028868	QTL_ID=5790;Name=Non-return rate;Abbrev=NRR;PUBMED_ID=17257192;trait_ID=1148;trait=Non-return rate;Coord_src=cM;FlankMarker=BMS871,BMS2522;breed=holstein;VTO_name=fertility trait;Map_Type=Linkage;Model=Mendelian;Test_Base=Chromosome-wise;Significance=Significant;P-value=<0.01
Chr.3	Reproduction_QTL	0	40670132	QTL_ID=5663;Name=Non-return rate;Abbrev=NRR;PUBMED_ID=18717969;trait_ID=1148;trait=Non-return rate;Coord_src=cM;FlankMarker=BMS871,BL41;breed=holstein;VTO_name=fertility trait;Map_Type=Linkage;Model=Mendelian;Test_Base=Chromosome-wise;Significance=Significant;P-value=<0.05;Variance=14;Additive_Effect=4.72
Chr.3	Reproduction_QTL	0	27028868	QTL_ID=5790;Name=Non-return rate;Abbrev=NRR;PUBMED_ID=17257192;trait_ID=1148;trait=Non-return rate;Coord_src=cM;FlankMarker=BMS871,BMS2522;breed=holstein;VTO_name=fertility trait;Map_Type=Linkage;Model=Mendelian;Test_Base=Chromosome-wise;Significance=Significant;P-value=<0.01
Chr.3	Reproduction_QTL	0	40670132	QTL_ID=5663;Name=Non-return rate;Abbrev=NRR;PUBMED_ID=18717969;trait_ID=1148;trait=Non-return rate;Coord_src=cM;FlankMarker=BMS871,BL41;breed=holstein;VTO_name=fertility trait;Map_Type=Linkage;Model=Mendelian;Test_Base=Chromosome-wise;Significance=Significant;P-value=<0.05;Variance=14;Additive_Effect=4.72
Chr.3	Reproduction_QTL	0	27028868	QTL_ID=5790;Name=Non-return rate;Abbrev=NRR;PUBMED_ID=17257192;trait_ID=1148;trait=Non-return rate;Coord_src=cM;FlankMarker=BMS871,BMS2522;breed=holstein;VTO_name=fertility trait;Map_Type=Linkage;Model=Mendelian;Test_Base=Chromosome-wise;Significance=Significant;P-value=<0.01
Chr.3	Reproduction_QTL	0	40670132	QTL_ID=5663;Name=Non-return rate;Abbrev=NRR;PUBMED_ID=18717969;trait_ID=1148;trait=Non-return rate;Coord_src=cM;FlankMarker=BMS871,BL41;breed=holstein;VTO_name=fertility trait;Map_Type=Linkage;Model=Mendelian;Test_Base=Chromosome-wise;Significance=Significant;P-value=<0.05;Variance=14;Additive_Effect=4.72
Chr.3	Reproduction_QTL	0	27028868	QTL_ID=5790;Name=Non-return rate;Abbrev=NRR;PUBMED_ID=17257192;trait_ID=1148;trait=Non-return rate;Coord_src=cM;FlankMarker=BMS871,BMS2522;breed=holstein;VTO_name=fertility trait;Map_Type=Linkage;Model=Mendelian;Test_Base=Chromosome-wise;Significance=Significant;P-value=<0.01
Chr.3	Reproduction_QTL	0	40670132	QTL_ID=5663;Name=Non-return rate;Abbrev=NRR;PUBMED_ID=18717969;trait_ID=1148;trait=Non-return rate;Coord_src=cM;FlankMarker=BMS871,BL41;breed=holstein;VTO_name=fertility trait;Map_Type=Linkage;Model=Mendelian;Test_Base=Chromosome-wise;Significance=Significant;P-value=<0.05;Variance=14;Additive_Effect=4.72
Chr.3	Reproduction_QTL	0	27028868	QTL_ID=5790;Name=Non-return rate;Abbrev=NRR;PUBMED_ID=17257192;trait_ID=1148;trait=Non-return rate;Coord_src=cM;FlankMarker=BMS871,BMS2522;breed=holstein;VTO_name=fertility trait;Map_Type=Linkage;Model=Mendelian;Test_Base=Chromosome-wise;Significance=Significant;P-value=<0.01
Chr.3	Reproduction_QTL	0	40670132	QTL_ID=5663;Name=Non-return rate;Abbrev=NRR;PUBMED_ID=18717969;trait_ID=1148;trait=Non-return rate;Coord_src=cM;FlankMarker=BMS871,BL41;breed=holstein;VTO_name=fertility trait;Map_Type=Linkage;Model=Mendelian;Test_Base=Chromosome-wise;Significance=Significant;P-value=<0.05;Variance=14;Additive_Effect=4.72
Chr.3	Reproduction_QTL	0	27028868	QTL_ID=5790;Name=Non-return rate;Abbrev=NRR;PUBMED_ID=17257192;trait_ID=1148;trait=Non-return rate;Coord_src=cM;FlankMarker=BMS871,BMS2522;breed=holstein;VTO_name=fertility trait;Map_Type=Linkage;Model=Mendelian;Test_Base=Chromosome-wise;Significance=Significant;P-value=<0.01
Chr.3	Reproduction_QTL	0	40670132	QTL_ID=5663;Name=Non-return rate;Abbrev=NRR;PUBMED_ID=18717969;trait_ID=1148;trait=Non-return rate;Coord_src=cM;FlankMarker=BMS871,BL41;breed=holstein;VTO_name=fertility trait;Map_Type=Linkage;Model=Mendelian;Test_Base=Chromosome-wise;Significance=Significant;P-value=<0.05;Variance=14;Additive_Effect=4.72
Chr.3	Reproduction_QTL	0	40670132	QTL_ID=5663;Name=Non-return rate;Abbrev=NRR;PUBMED_ID=18717969;trait_ID=1148;trait=Non-return rate;Coord_src=cM;FlankMarker=BMS871,BL41;breed=holstein;VTO_name=fertility trait;Map_Type=Linkage;Model=Mendelian;Test_Base=Chromosome-wise;Significance=Significant;P-value=<0.05;Variance=14;Additive_Effect=4.72
Chr.3	Reproduction_QTL	0	40670132	QTL_ID=5663;Name=Non-return rate;Abbrev=NRR;PUBMED_ID=18717969;trait_ID=1148;trait=Non-return rate;Coord_src=cM;FlankMarker=BMS871,BL41;breed=holstein;VTO_name=fertility trait;Map_Type=Linkage;Model=Mendelian;Test_Base=Chromosome-wise;Significance=Significant;P-value=<0.05;Variance=14;Additive_Effect=4.72
Chr.3	Milk_QTL	5636886	30063392	QTL_ID=3435;Name=Milk protein percentage;Abbrev=PP;PUBMED_ID=12605852;trait_ID=1041;trait=Milk protein percentage;Coord_src=cM;FlankMarker=ILSTS096;VTO_name=milk protein amount;PTO_name=milk protein content;CMO_name=milk protein percentage;Map_Type=Linkage;P-value=0.01
Chr.3	Milk_QTL	5636886	30063392	QTL_ID=3435;Name=Milk protein percentage;Abbrev=PP;PUBMED_ID=12605852;trait_ID=1041;trait=Milk protein percentage;Coord_src=cM;FlankMarker=ILSTS096;VTO_name=milk protein amount;PTO_name=milk protein content;CMO_name=milk protein percentage;Map_Type=Linkage;P-value=0.01
Chr.3	Milk_QTL	5636886	30063392	QTL_ID=3435;Name=Milk protein percentage;Abbrev=PP;PUBMED_ID=12605852;trait_ID=1041;trait=Milk protein percentage;Coord_src=cM;FlankMarker=ILSTS096;VTO_name=milk protein amount;PTO_name=milk protein content;CMO_name=milk protein percentage;Map_Type=Linkage;P-value=0.01
Chr.3	Milk_QTL	5636886	30063392	QTL_ID=3435;Name=Milk protein percentage;Abbrev=PP;PUBMED_ID=12605852;trait_ID=1041;trait=Milk protein percentage;Coord_src=cM;FlankMarker=ILSTS096;VTO_name=milk protein amount;PTO_name=milk protein content;CMO_name=milk protein percentage;Map_Type=Linkage;P-value=0.01
Chr.3	Milk_QTL	5636886	30063392	QTL_ID=3435;Name=Milk protein percentage;Abbrev=PP;PUBMED_ID=12605852;trait_ID=1041;trait=Milk protein percentage;Coord_src=cM;FlankMarker=ILSTS096;VTO_name=milk protein amount;PTO_name=milk protein content;CMO_name=milk protein percentage;Map_Type=Linkage;P-value=0.01
Chr.3	Milk_QTL	5636886	30063392	QTL_ID=3435;Name=Milk protein percentage;Abbrev=PP;PUBMED_ID=12605852;trait_ID=1041;trait=Milk protein percentage;Coord_src=cM;FlankMarker=ILSTS096;VTO_name=milk protein amount;PTO_name=milk protein content;CMO_name=milk protein percentage;Map_Type=Linkage;P-value=0.01
Chr.3	Milk_QTL	5636886	30063392	QTL_ID=3435;Name=Milk protein percentage;Abbrev=PP;PUBMED_ID=12605852;trait_ID=1041;trait=Milk protein percentage;Coord_src=cM;FlankMarker=ILSTS096;VTO_name=milk protein amount;PTO_name=milk protein content;CMO_name=milk protein percentage;Map_Type=Linkage;P-value=0.01
Chr.3	Meat_and_Carcass_QTL	8776631	31970538	QTL_ID=10677;Name=Carcass weight;Abbrev=CWT;PUBMED_ID=20477797;trait_ID=1022;trait=Carcass weight;Coord_src=cM;FlankMarker=URB006,BMS2904,BMS482;breed=Angus;PTO_name=dressed carcass weight;CMO_name=carcass weight;Map_Type=Linkage;Model=Mendelian;Test_Base=Chromosome-wise;Significance=Significant;P-value=0.002511886432;Dominance_Effect=0.0056
Chr.3	Meat_and_Carcass_QTL	8776631	31970538	QTL_ID=10677;Name=Carcass weight;Abbrev=CWT;PUBMED_ID=20477797;trait_ID=1022;trait=Carcass weight;Coord_src=cM;FlankMarker=URB006,BMS2904,BMS482;breed=Angus;PTO_name=dressed carcass weight;CMO_name=carcass weight;Map_Type=Linkage;Model=Mendelian;Test_Base=Chromosome-wise;Significance=Significant;P-value=0.002511886432;Dominance_Effect=0.0056
Chr.3	Meat_and_Carcass_QTL	8776631	31970538	QTL_ID=10677;Name=Carcass weight;Abbrev=CWT;PUBMED_ID=20477797;trait_ID=1022;trait=Carcass weight;Coord_src=cM;FlankMarker=URB006,BMS2904,BMS482;breed=Angus;PTO_name=dressed carcass weight;CMO_name=carcass weight;Map_Type=Linkage;Model=Mendelian;Test_Base=Chromosome-wise;Significance=Significant;P-value=0.002511886432;Dominance_Effect=0.0056
Chr.3	Meat_and_Carcass_QTL	8776631	31970538	QTL_ID=10677;Name=Carcass weight;Abbrev=CWT;PUBMED_ID=20477797;trait_ID=1022;trait=Carcass weight;Coord_src=cM;FlankMarker=URB006,BMS2904,BMS482;breed=Angus;PTO_name=dressed carcass weight;CMO_name=carcass weight;Map_Type=Linkage;Model=Mendelian;Test_Base=Chromosome-wise;Significance=Significant;P-value=0.002511886432;Dominance_Effect=0.0056
Chr.3	Meat_and_Carcass_QTL	8776631	31970538	QTL_ID=10677;Name=Carcass weight;Abbrev=CWT;PUBMED_ID=20477797;trait_ID=1022;trait=Carcass weight;Coord_src=cM;FlankMarker=URB006,BMS2904,BMS482;breed=Angus;PTO_name=dressed carcass weight;CMO_name=carcass weight;Map_Type=Linkage;Model=Mendelian;Test_Base=Chromosome-wise;Significance=Significant;P-value=0.002511886432;Dominance_Effect=0.0056
Chr.3	Meat_and_Carcass_QTL	8776631	31970538	QTL_ID=10677;Name=Carcass weight;Abbrev=CWT;PUBMED_ID=20477797;trait_ID=1022;trait=Carcass weight;Coord_src=cM;FlankMarker=URB006,BMS2904,BMS482;breed=Angus;PTO_name=dressed carcass weight;CMO_name=carcass weight;Map_Type=Linkage;Model=Mendelian;Test_Base=Chromosome-wise;Significance=Significant;P-value=0.002511886432;Dominance_Effect=0.0056
Chr.3	Meat_and_Carcass_QTL	8776631	31970538	QTL_ID=10677;Name=Carcass weight;Abbrev=CWT;PUBMED_ID=20477797;trait_ID=1022;trait=Carcass weight;Coord_src=cM;FlankMarker=URB006,BMS2904,BMS482;breed=Angus;PTO_name=dressed carcass weight;CMO_name=carcass weight;Map_Type=Linkage;Model=Mendelian;Test_Base=Chromosome-wise;Significance=Significant;P-value=0.002511886432;Dominance_Effect=0.0056
Chr.3	Meat_and_Carcass_QTL	8776631	31970538	QTL_ID=10677;Name=Carcass weight;Abbrev=CWT;PUBMED_ID=20477797;trait_ID=1022;trait=Carcass weight;Coord_src=cM;FlankMarker=URB006,BMS2904,BMS482;breed=Angus;PTO_name=dressed carcass weight;CMO_name=carcass weight;Map_Type=Linkage;Model=Mendelian;Test_Base=Chromosome-wise;Significance=Significant;P-value=0.002511886432;Dominance_Effect=0.0056
Chr.3	Production_QTL	8776631	24473480	QTL_ID=10681;Name=Body weight (weaning);Abbrev=WWT;PUBMED_ID=20477797;trait_ID=1063;trait=Body weight (weaning);Coord_src=cM;FlankMarker=URB006,BMS2904,BMS2904;breed=Angus;VTO_name=body mass;CMO_name=body weight;Map_Type=Linkage;Model=Mendelian;Test_Base=Genome-wise;Significance=Significant;Dominance_Effect=0.0297
Chr.3	Production_QTL	8776631	24473480	QTL_ID=10681;Name=Body weight (weaning);Abbrev=WWT;PUBMED_ID=20477797;trait_ID=1063;trait=Body weight (weaning);Coord_src=cM;FlankMarker=URB006,BMS2904,BMS2904;breed=Angus;VTO_name=body mass;CMO_name=body weight;Map_Type=Linkage;Model=Mendelian;Test_Base=Genome-wise;Significance=Significant;Dominance_Effect=0.0297
Chr.3	Production_QTL	8776631	24473480	QTL_ID=10681;Name=Body weight (weaning);Abbrev=WWT;PUBMED_ID=20477797;trait_ID=1063;trait=Body weight (weaning);Coord_src=cM;FlankMarker=URB006,BMS2904,BMS2904;breed=Angus;VTO_name=body mass;CMO_name=body weight;Map_Type=Linkage;Model=Mendelian;Test_Base=Genome-wise;Significance=Significant;Dominance_Effect=0.0297
Chr.3	Production_QTL	8776631	24473480	QTL_ID=10681;Name=Body weight (weaning);Abbrev=WWT;PUBMED_ID=20477797;trait_ID=1063;trait=Body weight (weaning);Coord_src=cM;FlankMarker=URB006,BMS2904,BMS2904;breed=Angus;VTO_name=body mass;CMO_name=body weight;Map_Type=Linkage;Model=Mendelian;Test_Base=Genome-wise;Significance=Significant;Dominance_Effect=0.0297
Chr.3	Production_QTL	8776631	24473480	QTL_ID=10681;Name=Body weight (weaning);Abbrev=WWT;PUBMED_ID=20477797;trait_ID=1063;trait=Body weight (weaning);Coord_src=cM;FlankMarker=URB006,BMS2904,BMS2904;breed=Angus;VTO_name=body mass;CMO_name=body weight;Map_Type=Linkage;Model=Mendelian;Test_Base=Genome-wise;Significance=Significant;Dominance_Effect=0.0297
Chr.3	Production_QTL	8776631	24473480	QTL_ID=10681;Name=Body weight (weaning);Abbrev=WWT;PUBMED_ID=20477797;trait_ID=1063;trait=Body weight (weaning);Coord_src=cM;FlankMarker=URB006,BMS2904,BMS2904;breed=Angus;VTO_name=body mass;CMO_name=body weight;Map_Type=Linkage;Model=Mendelian;Test_Base=Genome-wise;Significance=Significant;Dominance_Effect=0.0297
Chr.3	Reproduction_QTL	14655903	14843799	QTL_ID=6052;Name=Interval to first estrus after calving;Abbrev=CALEST;PUBMED_ID=18650300;trait_ID=1169;trait=Interval to first estrus after calving;Coord_src=cM;breed=holstein;VTO_name=female fertility trait;Map_Type=Linkage;Model=Mendelian;Test_Base=Chromosome-wise;Significance=Significant;P-value=<0.05
Chr.3	Milk_QTL	14684088	14871984	QTL_ID=3721;Name=Milk protein percentage;Abbrev=PP;PUBMED_ID=10984164;trait_ID=1041;trait=Milk protein percentage;Coord_src=cM;FlankMarker=BMS482;VTO_name=milk protein amount;PTO_name=milk protein content;CMO_name=milk protein percentage;Map_Type=Linkage;Test_Base=-;Significance=-;P-value=0.078
Chr.3	Milk_QTL	14684088	14871984	QTL_ID=3721;Name=Milk protein percentage;Abbrev=PP;PUBMED_ID=10984164;trait_ID=1041;trait=Milk protein percentage;Coord_src=cM;FlankMarker=BMS482;VTO_name=milk protein amount;PTO_name=milk protein content;CMO_name=milk protein percentage;Map_Type=Linkage;Test_Base=-;Significance=-;P-value=0.078
Chr.3	Milk_QTL	16053851	30147945	QTL_ID=2594;Name=Milk fat percentage;Abbrev=FP;PUBMED_ID=12778594;trait_ID=1037;trait=Milk fat percentage;Coord_src=cM;FlankMarker=INRA006,UWCA7,FCGR2;VTO_name=milk fat amount;PTO_name=milk fat content;CMO_name=milk fat percentage;Map_Type=Linkage;Significance=Significant;P-value=0.0464;F-Stat=3.21;gene_ID=282229;gene_IDsrc=NCBIgene
Chr.3	Milk_QTL	16053851	30147945	QTL_ID=2594;Name=Milk fat percentage;Abbrev=FP;PUBMED_ID=12778594;trait_ID=1037;trait=Milk fat percentage;Coord_src=cM;FlankMarker=INRA006,UWCA7,FCGR2;VTO_name=milk fat amount;PTO_name=milk fat content;CMO_name=milk fat percentage;Map_Type=Linkage;Significance=Significant;P-value=0.0464;F-Stat=3.21;gene_ID=282229;gene_IDsrc=NCBIgene
Chr.3	Milk_QTL	16053851	30147945	QTL_ID=2594;Name=Milk fat percentage;Abbrev=FP;PUBMED_ID=12778594;trait_ID=1037;trait=Milk fat percentage;Coord_src=cM;FlankMarker=INRA006,UWCA7,FCGR2;VTO_name=milk fat amount;PTO_name=milk fat content;CMO_name=milk fat percentage;Map_Type=Linkage;Significance=Significant;P-value=0.0464;F-Stat=3.21;gene_ID=282229;gene_IDsrc=NCBIgene
Chr.3	Milk_QTL	16053851	30147945	QTL_ID=2594;Name=Milk fat percentage;Abbrev=FP;PUBMED_ID=12778594;trait_ID=1037;trait=Milk fat percentage;Coord_src=cM;FlankMarker=INRA006,UWCA7,FCGR2;VTO_name=milk fat amount;PTO_name=milk fat content;CMO_name=milk fat percentage;Map_Type=Linkage;Significance=Significant;P-value=0.0464;F-Stat=3.21;gene_ID=282229;gene_IDsrc=NCBIgene
Chr.3	Milk_QTL	19071464	58529666	QTL_ID=2437;Name=Milk protein yield;Abbrev=PY;PUBMED_ID=11015574;trait_ID=1042;trait=Milk protein yield;Coord_src=cM;FlankMarker=ILSTS096;VTO_name=milk protein amount;PTO_name=milk protein yield;CMO_name=milk protein yield;Map_Type=Linkage;P-value=0.0056
Chr.3	Milk_QTL	19071464	58529666	QTL_ID=2437;Name=Milk protein yield;Abbrev=PY;PUBMED_ID=11015574;trait_ID=1042;trait=Milk protein yield;Coord_src=cM;FlankMarker=ILSTS096;VTO_name=milk protein amount;PTO_name=milk protein yield;CMO_name=milk protein yield;Map_Type=Linkage;P-value=0.0056
Chr.3	Milk_QTL	19071464	58529666	QTL_ID=2437;Name=Milk protein yield;Abbrev=PY;PUBMED_ID=11015574;trait_ID=1042;trait=Milk protein yield;Coord_src=cM;FlankMarker=ILSTS096;VTO_name=milk protein amount;PTO_name=milk protein yield;CMO_name=milk protein yield;Map_Type=Linkage;P-value=0.0056
Chr.3	Milk_QTL	19071464	58529666	QTL_ID=2437;Name=Milk protein yield;Abbrev=PY;PUBMED_ID=11015574;trait_ID=1042;trait=Milk protein yield;Coord_src=cM;FlankMarker=ILSTS096;VTO_name=milk protein amount;PTO_name=milk protein yield;CMO_name=milk protein yield;Map_Type=Linkage;P-value=0.0056
Chr.3	Milk_QTL	19071464	58529666	QTL_ID=2437;Name=Milk protein yield;Abbrev=PY;PUBMED_ID=11015574;trait_ID=1042;trait=Milk protein yield;Coord_src=cM;FlankMarker=ILSTS096;VTO_name=milk protein amount;PTO_name=milk protein yield;CMO_name=milk protein yield;Map_Type=Linkage;P-value=0.0056
Chr.3	Milk_QTL	19268755	19456651	QTL_ID=10135;Name=Milk protein yield;Abbrev=PY;PUBMED_ID=12487475;trait_ID=1042;trait=Milk protein yield;Coord_src=cM;breed=holstein;VTO_name=milk protein amount;PTO_name=milk protein yield;CMO_name=milk protein yield;Map_Type=Linkage;Model=Mendelian;Test_Base=Comparison-wise;Significance=Significant;P-value=3.9E-8;Additive_Effect=-8.8
Chr.3	Production_QTL	19729101	54489898	QTL_ID=1326;Name=Body weight (birth);Abbrev=BW;PUBMED_ID=14677852;trait_ID=1054;trait=Body weight (birth);Coord_src=cM;VTO_name=body mass;CMO_name=body weight;Map_Type=Linkage;F-Stat=13.0;Additive_Effect=1.89
Chr.3	Production_QTL	19729101	54489898	QTL_ID=1326;Name=Body weight (birth);Abbrev=BW;PUBMED_ID=14677852;trait_ID=1054;trait=Body weight (birth);Coord_src=cM;VTO_name=body mass;CMO_name=body weight;Map_Type=Linkage;F-Stat=13.0;Additive_Effect=1.89
Chr.3	Production_QTL	19729101	54489898	QTL_ID=1326;Name=Body weight (birth);Abbrev=BW;PUBMED_ID=14677852;trait_ID=1054;trait=Body weight (birth);Coord_src=cM;VTO_name=body mass;CMO_name=body weight;Map_Type=Linkage;F-Stat=13.0;Additive_Effect=1.89
Chr.3	Production_QTL	19729101	54489898	QTL_ID=1326;Name=Body weight (birth);Abbrev=BW;PUBMED_ID=14677852;trait_ID=1054;trait=Body weight (birth);Coord_src=cM;VTO_name=body mass;CMO_name=body weight;Map_Type=Linkage;F-Stat=13.0;Additive_Effect=1.89
Chr.3	Milk_QTL	19832443	20020340	QTL_ID=10137;Name=Milk protein yield;Abbrev=PY;PUBMED_ID=12487475;trait_ID=1042;trait=Milk protein yield;Coord_src=cM;breed=holstein;VTO_name=milk protein amount;PTO_name=milk protein yield;CMO_name=milk protein yield;Map_Type=Linkage;Model=Mendelian;Test_Base=Comparison-wise;Significance=Significant;P-value=0.000006;Additive_Effect=-7.6
Chr.3	Milk_QTL	20386737	67266839	QTL_ID=2443;Name=Milk protein percentage;Abbrev=PP;PUBMED_ID=11015574;trait_ID=1041;trait=Milk protein percentage;Coord_src=cM;FlankMarker=TGLA263;VTO_name=milk protein amount;PTO_name=milk protein content;CMO_name=milk protein percentage;Map_Type=Linkage;P-value=0.0049
Chr.3	Milk_QTL	20386737	67266839	QTL_ID=2443;Name=Milk protein percentage;Abbrev=PP;PUBMED_ID=11015574;trait_ID=1041;trait=Milk protein percentage;Coord_src=cM;FlankMarker=TGLA263;VTO_name=milk protein amount;PTO_name=milk protein content;CMO_name=milk protein percentage;Map_Type=Linkage;P-value=0.0049
Chr.3	Milk_QTL	20386737	67266839	QTL_ID=2443;Name=Milk protein percentage;Abbrev=PP;PUBMED_ID=11015574;trait_ID=1041;trait=Milk protein percentage;Coord_src=cM;FlankMarker=TGLA263;VTO_name=milk protein amount;PTO_name=milk protein content;CMO_name=milk protein percentage;Map_Type=Linkage;P-value=0.0049
Chr.3	Milk_QTL	21241665	25751174	QTL_ID=2655;Name=Milk fat yield;Abbrev=FY;PUBMED_ID=14762090;trait_ID=1039;trait=Milk fat yield;Coord_src=cM;FlankMarker=RM019,ILSTS096;VTO_name=milk fat amount;PTO_name=milk fat yield;CMO_name=milk fat yield;Map_Type=Linkage;Significance=Significant;F-Stat=10.9
Chr.3	Meat_and_Carcass_QTL	21608063	43216126	QTL_ID=1325;Name=Fat thickness at the 12th rib;Abbrev=FATTH;PUBMED_ID=14677852;trait_ID=1275;trait=Fat thickness at the 12th rib;Coord_src=cM;VTO_name=subcutaneous adipose thickness;CMO_name=back fat thickness;Map_Type=Linkage;F-Stat=10.7;Additive_Effect=-0.13
Chr.3	Meat_and_Carcass_QTL	21608063	43216126	QTL_ID=1325;Name=Fat thickness at the 12th rib;Abbrev=FATTH;PUBMED_ID=14677852;trait_ID=1275;trait=Fat thickness at the 12th rib;Coord_src=cM;VTO_name=subcutaneous adipose thickness;CMO_name=back fat thickness;Map_Type=Linkage;F-Stat=10.7;Additive_Effect=-0.13
Chr.3	Meat_and_Carcass_QTL	21608063	43216126	QTL_ID=1325;Name=Fat thickness at the 12th rib;Abbrev=FATTH;PUBMED_ID=14677852;trait_ID=1275;trait=Fat thickness at the 12th rib;Coord_src=cM;VTO_name=subcutaneous adipose thickness;CMO_name=back fat thickness;Map_Type=Linkage;F-Stat=10.7;Additive_Effect=-0.13
Chr.3	Milk_QTL	21617457	21805354	QTL_ID=10383;Name=Milk protein percentage;Abbrev=PP;PUBMED_ID=14762092;trait_ID=1041;trait=Milk protein percentage;Coord_src=cM;breed=holstein;VTO_name=milk protein amount;PTO_name=milk protein content;CMO_name=milk protein percentage;Map_Type=Linkage;Model=Mendelian;Test_Base=Chromosome-wise;Significance=Significant;P-value=0.007
Chr.3	Milk_QTL	22669676	27291923	QTL_ID=10384;Name=Milk protein percentage;Abbrev=PP;PUBMED_ID=14762092;trait_ID=1041;trait=Milk protein percentage;Coord_src=cM;breed=holstein;VTO_name=milk protein amount;PTO_name=milk protein content;CMO_name=milk protein percentage;Map_Type=Linkage;Model=Mendelian;Test_Base=Chromosome-wise;Significance=Significant;P-value=0.048
Chr.3	Exterior_QTL	24473480	31970538	QTL_ID=1679;Name=Teat placement - front;Abbrev=FTPL;PUBMED_ID=16167984;trait_ID=1697;trait=Teat placement - front;Coord_src=cM;FlankMarker=BMS2904,BMS482;VTO_name=udder morphology trait;Map_Type=Linkage;Test_Base=-;Significance=-;F-Stat=19.52;Additive_Effect=-0.76
Chr.3	Exterior_QTL	24473480	31970538	QTL_ID=1679;Name=Teat placement - front;Abbrev=FTPL;PUBMED_ID=16167984;trait_ID=1697;trait=Teat placement - front;Coord_src=cM;FlankMarker=BMS2904,BMS482;VTO_name=udder morphology trait;Map_Type=Linkage;Test_Base=-;Significance=-;F-Stat=19.52;Additive_Effect=-0.76
Chr.3	Meat_and_Carcass_QTL	24473480	43253705	QTL_ID=10682;Name=Carcass weight;Abbrev=CWT;PUBMED_ID=20477797;trait_ID=1022;trait=Carcass weight;Coord_src=cM;FlankMarker=BMS2904,BMS482,BM723;breed=Angus;PTO_name=dressed carcass weight;CMO_name=carcass weight;Map_Type=Linkage;Model=Mendelian;Test_Base=Genome-wise;Significance=Significant;P-value=0.001096478196;Dominance_Effect=0.0261
Chr.3	Meat_and_Carcass_QTL	24473480	43253705	QTL_ID=10682;Name=Carcass weight;Abbrev=CWT;PUBMED_ID=20477797;trait_ID=1022;trait=Carcass weight;Coord_src=cM;FlankMarker=BMS2904,BMS482,BM723;breed=Angus;PTO_name=dressed carcass weight;CMO_name=carcass weight;Map_Type=Linkage;Model=Mendelian;Test_Base=Genome-wise;Significance=Significant;P-value=0.001096478196;Dominance_Effect=0.0261
Chr.3	Milk_QTL	29123911	55241482	QTL_ID=2442;Name=Milk fat percentage;Abbrev=FP;PUBMED_ID=11015574;trait_ID=1037;trait=Milk fat percentage;Coord_src=cM;FlankMarker=TGLA263;VTO_name=milk fat amount;PTO_name=milk fat content;CMO_name=milk fat percentage;Map_Type=Linkage;P-value=0.00005
Chr.3	Milk_QTL	31425639	63867797	QTL_ID=2584;Name=Milk yield;Abbrev=MY;PUBMED_ID=12778594;trait_ID=1044;trait=Milk yield;Coord_src=cM;FlankMarker=INRA025,HUJ246;VTO_name=milk amount;CMO_name=milk yield;Map_Type=Linkage;Significance=Significant;P-value=<0.0029;F-Stat=5.05
Chr.3	Reproduction_QTL	82044875	95545217	QTL_ID=16062;Name=Calf size;Abbrev=CALFSZ;PUBMED_ID=21117339;trait_ID=1168;trait=Calf size;Coord_src=cM;FlankMarker=HUJII77,BM7225;breed=jersey;CMO_name=size of newly born offspring;Map_Type=Linkage;Model=Mendelian;Test_Base=Chromosome-wise;Significance=Significant;P-value=0.0016
Chr.3	Health_QTL	82045815	111422446	QTL_ID=2489;Name=Clinical mastitis;Abbrev=CM;PUBMED_ID=11845286;trait_ID=1146;trait=Clinical mastitis;Coord_src=cM;FlankMarker=HUJJII77,BM2924;CMO_name=disease incidence/prevalence measurement;Map_Type=Linkage;Significance=Significant;P-value=0.014;gene_ID=19122;gene_IDsrc=NCBIgene
Chr.3	Meat_and_Carcass_QTL	88142107	109449536	QTL_ID=10699;Name=Carcass weight;Abbrev=CWT;PUBMED_ID=20477797;trait_ID=1022;trait=Carcass weight;Coord_src=cM;FlankMarker=BMS2145,BM7225,BMS896;breed=Angus;PTO_name=dressed carcass weight;CMO_name=carcass weight;Map_Type=Linkage;Model=Mendelian;Test_Base=Chromosome-wise;Significance=Significant;P-value=0.000245470892;Bayes-value=6;Dominance_Effect=0.0415
Chr.3	Production_QTL	88142107	95545217	QTL_ID=10698;Name=Body weight (yearling);Abbrev=W365;PUBMED_ID=20477797;trait_ID=1064;trait=Body weight (yearling);Coord_src=cM;FlankMarker=BMS2145,BMS2145,BM7225;breed=Angus;VTO_name=body mass;CMO_name=body weight;Map_Type=Linkage;Model=Mendelian;Test_Base=Chromosome-wise;Significance=Significant;P-value=0.005370317964;Bayes-value=5;Dominance_Effect=0.0274
Chr.4	Production_QTL	4163490	28463861	QTL_ID=1557;Name=Body depth;Abbrev=BD;PUBMED_ID=16230715;trait_ID=1131;trait=Body depth;Coord_src=cM;FlankMarker=BMC1410,RM188;VTO_name=chest depth;Map_Type=Linkage;Significance=Significant;F-Stat=2.54
Chr.4	Meat_and_Carcass_QTL	7878604	34398836	QTL_ID=2545;Name=Tenderness score;Abbrev=TEND;PUBMED_ID=11325189;trait_ID=1030;trait=Tenderness score;Coord_src=cM;FlankMarker=BL1024,BMS1237;PTO_name=meat tenderness;Map_Type=Linkage;Significance=Suggestive;F-Stat=12.2
Chr.4	Meat_and_Carcass_QTL	7878604	34398836	QTL_ID=2545;Name=Tenderness score;Abbrev=TEND;PUBMED_ID=11325189;trait_ID=1030;trait=Tenderness score;Coord_src=cM;FlankMarker=BL1024,BMS1237;PTO_name=meat tenderness;Map_Type=Linkage;Significance=Suggestive;F-Stat=12.2
Chr.4	Health_QTL	12550521	51252965	QTL_ID=66167;Name=Immunoglobulin G level;Abbrev=SIGG;PUBMED_ID=21138580;trait_ID=1197;trait=Immunoglobulin G level;Coord_src=cM;FlankMarker=BMS1788,MAF50;breed=charolais,holstein;VTO_name=blood immunoglobulin G amount;CMO_name=blood immunoglobulin G level;Map_Type=Linkage;Model=Mendelian;Test_Base=Chromosome-wise;Significance=Significant;P-value=<0.05;F-Stat=5.17;Variance=1.18;Dominance_Effect=0.…
Chr.4	Health_QTL	12550521	51252965	QTL_ID=66167;Name=Immunoglobulin G level;Abbrev=SIGG;PUBMED_ID=21138580;trait_ID=1197;trait=Immunoglobulin G level;Coord_src=cM;FlankMarker=BMS1788,MAF50;breed=charolais,holstein;VTO_name=blood immunoglobulin G amount;CMO_name=blood immunoglobulin G level;Map_Type=Linkage;Model=Mendelian;Test_Base=Chromosome-wise;Significance=Significant;P-value=<0.05;F-Stat=5.17;Variance=1.18;Dominance_Effect=0.…
Chr.4	Production_QTL	12550521	28463861	QTL_ID=10704;Name=Body weight (birth);Abbrev=BW;PUBMED_ID=20477797;trait_ID=1054;trait=Body weight (birth);Coord_src=cM;FlankMarker=BMS1788,BMS1788,BMS827;breed=Angus;VTO_name=body mass;CMO_name=body weight;Map_Type=Linkage;Model=Mendelian;Test_Base=Genome-wise;Significance=Significant;P-value=0.000263026799;Dominance_Effect=0.013
Chr.4	Meat_and_Carcass_QTL	17014263	41034399	QTL_ID=2543;Name=Carcass weight;Abbrev=CWT;PUBMED_ID=11325189;trait_ID=1022;trait=Carcass weight;Coord_src=cM;PTO_name=dressed carcass weight;CMO_name=carcass weight;Map_Type=Linkage;F-Stat=17.6;Additive_Effect=15.3
Chr.4	Production_QTL	22018458	45037755	QTL_ID=2544;Name=Average daily gain;Abbrev=ADG;PUBMED_ID=11325189;trait_ID=1053;trait=Average daily gain;Coord_src=cM;VTO_name=postnatal growth trait;CMO_name=average daily body weight gain;Map_Type=Linkage;F-Stat=17.1;Additive_Effect=0.08
Chr.4	Health_QTL	28463861	52534039	QTL_ID=2730;Name=Somatic cell score;Abbrev=SCS;PUBMED_ID=9691050;trait_ID=1005;trait=Somatic cell score;Coord_src=cM;FlankMarker=RM188,TGLA116;VTO_name=milk somatic cell quantity;PTO_name=milk somatic cell count;CMO_name=milk somatic cell score;Map_Type=Linkage;Significance=Significant;F-Stat=3.44
Chr.4	Production_QTL	28463861	30815832	QTL_ID=10705;Name=Height (mature);Abbrev=MHT;PUBMED_ID=20477797;trait_ID=1272;trait=Height (mature);Coord_src=cM;FlankMarker=BMS827,BMS827,BMS1172;breed=Angus;VTO_name=body height;CMO_name=body height;Map_Type=Linkage;Model=Mendelian;Test_Base=Chromosome-wise;Significance=Significant;P-value=0.000234422882;Dominance_Effect=0.0369
Chr.5	Health_QTL	11185304	103882522	QTL_ID=9915;Name=Tick resistance;Abbrev=TICKR;PUBMED_ID=17894560;trait_ID=1238;trait=Tick resistance;Coord_src=cM;breed=gir,holstein;VTO_name=response to parasitic infection trait;Map_Type=Linkage;Model=Mendelian;Test_Base=Chromosome-wise;Significance=Significant;LOD-score=2.815;P-value=<0.05;F-Stat=6.63
Chr.5	Milk_QTL	15055438	103528276	QTL_ID=9996;Name=Milk yield;Abbrev=MY;PUBMED_ID=19793271;trait_ID=1044;trait=Milk yield;Coord_src=cM;FlankMarker=BM2830;VTO_name=milk amount;CMO_name=milk yield;Map_Type=Linkage;Model=Mendelian;Test_Base=-;Significance=Significant;P-value=0.035;Likelihood_Ratio=4.42
Chr.5	Milk_QTL	17889402	109284767	QTL_ID=21534;Name=Milk alpha-lactalbumin percentage;Abbrev=MALACTP;PUBMED_ID=19397519;trait_ID=1420;trait=Milk alpha-lactalbumin percentage;Coord_src=cM;breed=holstein;VTO_name=milk alpha-lactalbumin amount;PTO_name=egg albumen flavor trait;CMO_name=milk alpha-lactalbumin percentage;Map_Type=Linkage;Model=-;Test_Base=Genome-wise;Significance=Significant;P-value=0.043;F-Stat=4.46
Chr.5	Milk_QTL	17889402	109284767	QTL_ID=21534;Name=Milk alpha-lactalbumin percentage;Abbrev=MALACTP;PUBMED_ID=19397519;trait_ID=1420;trait=Milk alpha-lactalbumin percentage;Coord_src=cM;breed=holstein;VTO_name=milk alpha-lactalbumin amount;PTO_name=egg albumen flavor trait;CMO_name=milk alpha-lactalbumin percentage;Map_Type=Linkage;Model=-;Test_Base=Genome-wise;Significance=Significant;P-value=0.043;F-Stat=4.46
Chr.5	Milk_QTL	31882104	117786662	QTL_ID=9993;Name=Milk yield;Abbrev=MY;PUBMED_ID=19793271;trait_ID=1044;trait=Milk yield;Coord_src=cM;VTO_name=milk amount;CMO_name=milk yield;Map_Type=Linkage;Model=Mendelian;Test_Base=Chromosome-wise;Significance=Significant;P-value=0.03
Chr.5	Milk_QTL	31882104	117786662	QTL_ID=9993;Name=Milk yield;Abbrev=MY;PUBMED_ID=19793271;trait_ID=1044;trait=Milk yield;Coord_src=cM;VTO_name=milk amount;CMO_name=milk yield;Map_Type=Linkage;Model=Mendelian;Test_Base=Chromosome-wise;Significance=Significant;P-value=0.03
Chr.5	Production_QTL	47823156	113358592	QTL_ID=3422;Name=Rump length;Abbrev=RUMLGT;PUBMED_ID=12605852;trait_ID=1122;trait=Rump length;Coord_src=cM;FlankMarker=BM315;VTO_name=rump morphology trait;Map_Type=Linkage;P-value=0.0027
Chr.5	Production_QTL	47823156	113358592	QTL_ID=3422;Name=Rump length;Abbrev=RUMLGT;PUBMED_ID=12605852;trait_ID=1122;trait=Rump length;Coord_src=cM;FlankMarker=BM315;VTO_name=rump morphology trait;Map_Type=Linkage;P-value=0.0027
Chr.5	Production_QTL	59336138	109816136	QTL_ID=3424;Name=Rump width;Abbrev=RUMWD;PUBMED_ID=12605852;trait_ID=1150;trait=Rump width;Coord_src=cM;FlankMarker=BM315;VTO_name=rump width;Map_Type=Linkage;P-value=0.0003
Chr.5	Production_QTL	59336138	109816136	QTL_ID=3424;Name=Rump width;Abbrev=RUMWD;PUBMED_ID=12605852;trait_ID=1150;trait=Rump width;Coord_src=cM;FlankMarker=BM315;VTO_name=rump width;Map_Type=Linkage;P-value=0.0003
Chr.5	Milk_QTL	70973105	107779223	QTL_ID=2585;Name=Milk yield;Abbrev=MY;PUBMED_ID=12778594;trait_ID=1044;trait=Milk yield;Coord_src=cM;FlankMarker=BM1819,ETH152;VTO_name=milk amount;CMO_name=milk yield;Map_Type=Linkage;Significance=Significant;P-value=<0.0029;F-Stat=4.56
Chr.5	Production_QTL	79705260	115129820	QTL_ID=37682;Name=Body weight (18 months);Abbrev=BW;PUBMED_ID=ISU0074;trait_ID=1392;trait=Body weight (18 months);Coord_src=cM;FlankMarker=IGF1,BM6026,RM500,CSSM34;breed=romosinuano;VTO_name=body mass;CMO_name=body weight;Map_Type=Linkage;Model=Sex-specific;Test_Base=Experiment-wise;Significance=Significant;P-value=0.05;F-Stat=1.91;Likelihood_Ratio=18.97
Chr.5	Production_QTL	79705260	115129820	QTL_ID=37682;Name=Body weight (18 months);Abbrev=BW;PUBMED_ID=ISU0074;trait_ID=1392;trait=Body weight (18 months);Coord_src=cM;FlankMarker=IGF1,BM6026,RM500,CSSM34;breed=romosinuano;VTO_name=body mass;CMO_name=body weight;Map_Type=Linkage;Model=Sex-specific;Test_Base=Experiment-wise;Significance=Significant;P-value=0.05;F-Stat=1.91;Likelihood_Ratio=18.97
Chr.5	Reproduction_QTL	80449175	103528276	QTL_ID=10741;Name=Calving ease;Abbrev=CALEASE;PUBMED_ID=20477797;trait_ID=1073;trait=Calving ease;Coord_src=cM;FlankMarker=BMS1248,BM315,BM2830;breed=Angus;VTO_name=parturition trait;Map_Type=Linkage;Model=Mendelian;Test_Base=Genome-wise;Significance=Significant;P-value=0.005888436554;Bayes-value=5;Dominance_Effect=0.0436
Chr.5	Reproduction_QTL	86790172	111587364	QTL_ID=10570;Name=Ovulation rate;Abbrev=OVR;PUBMED_ID=10656928;trait_ID=1111;trait=Ovulation rate;Coord_src=cM;breed=holstein;VTO_name=ovulation trait;Map_Type=Linkage;Model=Mendelian;Test_Base=Comparison-wise;Significance=Significant;P-value=<0.00002
Chr.5	Reproduction_QTL	86790172	111587364	QTL_ID=10570;Name=Ovulation rate;Abbrev=OVR;PUBMED_ID=10656928;trait_ID=1111;trait=Ovulation rate;Coord_src=cM;breed=holstein;VTO_name=ovulation trait;Map_Type=Linkage;Model=Mendelian;Test_Base=Comparison-wise;Significance=Significant;P-value=<0.00002
Chr.5	Exterior_QTL	91306803	103528276	QTL_ID=1561;Name=Udder attachment;Abbrev=UA;PUBMED_ID=16230715;trait_ID=1133;trait=Udder attachment;Coord_src=cM;FlankMarker=BM315,BM2830;VTO_name=udder morphology trait;Map_Type=Linkage;Significance=Significant;F-Stat=3.56
Chr.5	Production_QTL	91306803	114244206	QTL_ID=3445;Name=Chest depth;Abbrev=CHDPT;PUBMED_ID=12605852;trait_ID=1117;trait=Chest depth;Coord_src=cM;FlankMarker=BM315;VTO_name=chest depth;Map_Type=Linkage;P-value=0.01
Chr.5	Production_QTL	91306803	118672276	QTL_ID=3420;Name=Hip height;Abbrev=HIPHT;PUBMED_ID=12605852;trait_ID=1113;trait=Hip height;Coord_src=cM;FlankMarker=BM315;VTO_name=body height;CMO_name=body height at hip;Map_Type=Linkage;P-value=<0.00001
Chr.5	Production_QTL	91306803	114244206	QTL_ID=3445;Name=Chest depth;Abbrev=CHDPT;PUBMED_ID=12605852;trait_ID=1117;trait=Chest depth;Coord_src=cM;FlankMarker=BM315;VTO_name=chest depth;Map_Type=Linkage;P-value=0.01
Chr.5	Production_QTL	91306803	118672276	QTL_ID=3420;Name=Hip height;Abbrev=HIPHT;PUBMED_ID=12605852;trait_ID=1113;trait=Hip height;Coord_src=cM;FlankMarker=BM315;VTO_name=body height;CMO_name=body height at hip;Map_Type=Linkage;P-value=<0.00001
Chr.5	Health_QTL	91572487	107779223	QTL_ID=66172;Name=ConA-induced cell proliferation;Abbrev=CONA;PUBMED_ID=21138580;trait_ID=1610;trait=ConA-induced cell proliferation;Coord_src=cM;FlankMarker=ILSTS034,ETH152;breed=charolais,holstein;CMO_name=mitogen-stimulated white blood cell radioactive nucleoside incorporation;Map_Type=Linkage;Model=Mendelian;Test_Base=Chromosome-wise;Significance=Significant;P-value=<0.05;F-Stat=5.76;Variance…
Chr.5	Meat_and_Carcass_QTL	93520838	110701750	QTL_ID=10751;Name=Fat thickness at the 12th rib;Abbrev=FATTH;PUBMED_ID=20477797;trait_ID=1275;trait=Fat thickness at the 12th rib;Coord_src=cM;FlankMarker=BMS1658,BMS597,BMS597;breed=Angus;VTO_name=subcutaneous adipose thickness;CMO_name=back fat thickness;Map_Type=Linkage;Model=Mendelian;Test_Base=Chromosome-wise;Significance=Significant;P-value=0.000288403150;Dominance_Effect=0.006
Chr.5	Meat_and_Carcass_QTL	93520838	110701750	QTL_ID=10751;Name=Fat thickness at the 12th rib;Abbrev=FATTH;PUBMED_ID=20477797;trait_ID=1275;trait=Fat thickness at the 12th rib;Coord_src=cM;FlankMarker=BMS1658,BMS597,BMS597;breed=Angus;VTO_name=subcutaneous adipose thickness;CMO_name=back fat thickness;Map_Type=Linkage;Model=Mendelian;Test_Base=Chromosome-wise;Significance=Significant;P-value=0.000288403150;Dominance_Effect=0.006
Chr.5	Production_QTL	93520838	103528276	QTL_ID=10745;Name=Height (mature);Abbrev=MHT;PUBMED_ID=20477797;trait_ID=1272;trait=Height (mature);Coord_src=cM;FlankMarker=BMS1658,BMS1658,BM2830;breed=Angus;VTO_name=body height;CMO_name=body height;Map_Type=Linkage;Model=Mendelian;Test_Base=Chromosome-wise;Significance=Significant;P-value=0.001513561248;Dominance_Effect=0.051
Chr.5	Production_QTL	93520838	107779223	QTL_ID=10747;Name=Body weight (mature);Abbrev=MWT;PUBMED_ID=20477797;trait_ID=1271;trait=Body weight (mature);Coord_src=cM;FlankMarker=BMS1658,BM2830,ETH152;breed=Angus;VTO_name=body mass;CMO_name=body weight;Map_Type=Linkage;Model=Mendelian;Test_Base=Genome-wise;Significance=Significant;P-value=0.000066069345;Bayes-value=221;Dominance_Effect=0.1405
Chr.5	Milk_QTL	98745961	107779223	QTL_ID=2717;Name=Milk fat percentage;Abbrev=FP;PUBMED_ID=12487480;trait_ID=1037;trait=Milk fat percentage;Coord_src=cM;FlankMarker=UW48,ETH152;VTO_name=milk fat amount;PTO_name=milk fat content;CMO_name=milk fat percentage;Map_Type=Linkage;Significance=Significant;P-value=0.009;F-Stat=4.90
Chr.5	Meat_and_Carcass_QTL	103528276	110701750	QTL_ID=10748;Name=Longissimus muscle area;Abbrev=LMA;PUBMED_ID=20477797;trait_ID=1090;trait=Longissimus muscle area;Coord_src=cM;FlankMarker=BM2830,BM2830,BMS597;breed=Angus;VTO_name=longissimus thoracis muscle area;Map_Type=Linkage;Model=Mendelian;Test_Base=Genome-wise;Significance=Significant;P-value=0.000011220185;Dominance_Effect=0.0238
Chr.5	Exterior_QTL	107779223	112915785	QTL_ID=1560;Name=Teat placement - front;Abbrev=FTPL;PUBMED_ID=16230715;trait_ID=1697;trait=Teat placement - front;Coord_src=cM;FlankMarker=BM43,URB060;VTO_name=udder morphology trait;Map_Type=Linkage;Test_Base=-;Significance=-;F-Stat=3.67
Chr.6	Health_QTL	13235678	111495252	QTL_ID=10439;Name=Somatic cell score;Abbrev=SCS;PUBMED_ID=15514072;trait_ID=1005;trait=Somatic cell score;Coord_src=cM;breed=holstein;VTO_name=milk somatic cell quantity;PTO_name=milk somatic cell count;CMO_name=milk somatic cell score;Map_Type=Linkage;Model=Mendelian;Test_Base=Chromosome-wise;Significance=Significant;P-value=0.0440;F-Stat=2.0
Chr.6	Health_QTL	13235678	111495252	QTL_ID=10439;Name=Somatic cell score;Abbrev=SCS;PUBMED_ID=15514072;trait_ID=1005;trait=Somatic cell score;Coord_src=cM;breed=holstein;VTO_name=milk somatic cell quantity;PTO_name=milk somatic cell count;CMO_name=milk somatic cell score;Map_Type=Linkage;Model=Mendelian;Test_Base=Chromosome-wise;Significance=Significant;P-value=0.0440;F-Stat=2.0
Chr.6	Health_QTL	13235678	111495252	QTL_ID=10439;Name=Somatic cell score;Abbrev=SCS;PUBMED_ID=15514072;trait_ID=1005;trait=Somatic cell score;Coord_src=cM;breed=holstein;VTO_name=milk somatic cell quantity;PTO_name=milk somatic cell count;CMO_name=milk somatic cell score;Map_Type=Linkage;Model=Mendelian;Test_Base=Chromosome-wise;Significance=Significant;P-value=0.0440;F-Stat=2.0
Chr.6	Health_QTL	13235678	111495252	QTL_ID=10439;Name=Somatic cell score;Abbrev=SCS;PUBMED_ID=15514072;trait_ID=1005;trait=Somatic cell score;Coord_src=cM;breed=holstein;VTO_name=milk somatic cell quantity;PTO_name=milk somatic cell count;CMO_name=milk somatic cell score;Map_Type=Linkage;Model=Mendelian;Test_Base=Chromosome-wise;Significance=Significant;P-value=0.0440;F-Stat=2.0
Chr.6	Health_QTL	13235678	111495252	QTL_ID=10439;Name=Somatic cell score;Abbrev=SCS;PUBMED_ID=15514072;trait_ID=1005;trait=Somatic cell score;Coord_src=cM;breed=holstein;VTO_name=milk somatic cell quantity;PTO_name=milk somatic cell count;CMO_name=milk somatic cell score;Map_Type=Linkage;Model=Mendelian;Test_Base=Chromosome-wise;Significance=Significant;P-value=0.0440;F-Stat=2.0
Chr.6	Milk_QTL	73628940	113073015	QTL_ID=3412;Name=Milk protein percentage;Abbrev=PP;PUBMED_ID=12605852;trait_ID=1041;trait=Milk protein percentage;Coord_src=cM;FlankMarker=INRAK;VTO_name=milk protein amount;PTO_name=milk protein content;CMO_name=milk protein percentage;Map_Type=Linkage;P-value=0.0004
Chr.6	Milk_QTL	73628940	113073015	QTL_ID=3412;Name=Milk protein percentage;Abbrev=PP;PUBMED_ID=12605852;trait_ID=1041;trait=Milk protein percentage;Coord_src=cM;FlankMarker=INRAK;VTO_name=milk protein amount;PTO_name=milk protein content;CMO_name=milk protein percentage;Map_Type=Linkage;P-value=0.0004
Chr.6	Milk_QTL	73628940	113073015	QTL_ID=3412;Name=Milk protein percentage;Abbrev=PP;PUBMED_ID=12605852;trait_ID=1041;trait=Milk protein percentage;Coord_src=cM;FlankMarker=INRAK;VTO_name=milk protein amount;PTO_name=milk protein content;CMO_name=milk protein percentage;Map_Type=Linkage;P-value=0.0004
Chr.6	Milk_QTL	73628940	113073015	QTL_ID=3412;Name=Milk protein percentage;Abbrev=PP;PUBMED_ID=12605852;trait_ID=1041;trait=Milk protein percentage;Coord_src=cM;FlankMarker=INRAK;VTO_name=milk protein amount;PTO_name=milk protein content;CMO_name=milk protein percentage;Map_Type=Linkage;P-value=0.0004
Chr.6	Milk_QTL	73628940	113073015	QTL_ID=3412;Name=Milk protein percentage;Abbrev=PP;PUBMED_ID=12605852;trait_ID=1041;trait=Milk protein percentage;Coord_src=cM;FlankMarker=INRAK;VTO_name=milk protein amount;PTO_name=milk protein content;CMO_name=milk protein percentage;Map_Type=Linkage;P-value=0.0004
Chr.6	Meat_and_Carcass_QTL	78318402	103431130	QTL_ID=10776;Name=Longissimus muscle area;Abbrev=LMA;PUBMED_ID=20477797;trait_ID=1090;trait=Longissimus muscle area;Coord_src=cM;FlankMarker=CSN3,BM8124,BMS5029;breed=Angus;VTO_name=longissimus thoracis muscle area;Map_Type=Linkage;Model=Mendelian;Test_Base=Chromosome-wise;Significance=Significant;P-value=0.000758577575;Dominance_Effect=0.0066
Chr.6	Meat_and_Carcass_QTL	78318402	103431130	QTL_ID=10776;Name=Longissimus muscle area;Abbrev=LMA;PUBMED_ID=20477797;trait_ID=1090;trait=Longissimus muscle area;Coord_src=cM;FlankMarker=CSN3,BM8124,BMS5029;breed=Angus;VTO_name=longissimus thoracis muscle area;Map_Type=Linkage;Model=Mendelian;Test_Base=Chromosome-wise;Significance=Significant;P-value=0.000758577575;Dominance_Effect=0.0066
Chr.6	Meat_and_Carcass_QTL	78318402	103431130	QTL_ID=10776;Name=Longissimus muscle area;Abbrev=LMA;PUBMED_ID=20477797;trait_ID=1090;trait=Longissimus muscle area;Coord_src=cM;FlankMarker=CSN3,BM8124,BMS5029;breed=Angus;VTO_name=longissimus thoracis muscle area;Map_Type=Linkage;Model=Mendelian;Test_Base=Chromosome-wise;Significance=Significant;P-value=0.000758577575;Dominance_Effect=0.0066
Chr.6	Meat_and_Carcass_QTL	78318402	103431130	QTL_ID=10776;Name=Longissimus muscle area;Abbrev=LMA;PUBMED_ID=20477797;trait_ID=1090;trait=Longissimus muscle area;Coord_src=cM;FlankMarker=CSN3,BM8124,BMS5029;breed=Angus;VTO_name=longissimus thoracis muscle area;Map_Type=Linkage;Model=Mendelian;Test_Base=Chromosome-wise;Significance=Significant;P-value=0.000758577575;Dominance_Effect=0.0066
Chr.6	Meat_and_Carcass_QTL	78318402	103431130	QTL_ID=10776;Name=Longissimus muscle area;Abbrev=LMA;PUBMED_ID=20477797;trait_ID=1090;trait=Longissimus muscle area;Coord_src=cM;FlankMarker=CSN3,BM8124,BMS5029;breed=Angus;VTO_name=longissimus thoracis muscle area;Map_Type=Linkage;Model=Mendelian;Test_Base=Chromosome-wise;Significance=Significant;P-value=0.000758577575;Dominance_Effect=0.0066
Chr.6	Exterior_QTL	82254044	104307665	QTL_ID=1569;Name=Teat length;Abbrev=TLGTH;PUBMED_ID=16230715;trait_ID=1096;trait=Teat length;Coord_src=cM;FlankMarker=BMS5021,BMC4203;VTO_name=nipple length;CMO_name=teat length;Map_Type=Linkage;Significance=Significant;F-Stat=3.16
Chr.6	Exterior_QTL	82254044	104307665	QTL_ID=1569;Name=Teat length;Abbrev=TLGTH;PUBMED_ID=16230715;trait_ID=1096;trait=Teat length;Coord_src=cM;FlankMarker=BMS5021,BMC4203;VTO_name=nipple length;CMO_name=teat length;Map_Type=Linkage;Significance=Significant;F-Stat=3.16
Chr.6	Exterior_QTL	82254044	104307665	QTL_ID=1569;Name=Teat length;Abbrev=TLGTH;PUBMED_ID=16230715;trait_ID=1096;trait=Teat length;Coord_src=cM;FlankMarker=BMS5021,BMC4203;VTO_name=nipple length;CMO_name=teat length;Map_Type=Linkage;Significance=Significant;F-Stat=3.16
Chr.6	Exterior_QTL	82254044	104307665	QTL_ID=1569;Name=Teat length;Abbrev=TLGTH;PUBMED_ID=16230715;trait_ID=1096;trait=Teat length;Coord_src=cM;FlankMarker=BMS5021,BMC4203;VTO_name=nipple length;CMO_name=teat length;Map_Type=Linkage;Significance=Significant;F-Stat=3.16
Chr.6	Exterior_QTL	82254044	104307665	QTL_ID=1569;Name=Teat length;Abbrev=TLGTH;PUBMED_ID=16230715;trait_ID=1096;trait=Teat length;Coord_src=cM;FlankMarker=BMS5021,BMC4203;VTO_name=nipple length;CMO_name=teat length;Map_Type=Linkage;Significance=Significant;F-Stat=3.16
Chr.6	Milk_QTL	85006364	111495252	QTL_ID=2430;Name=Milk yield;Abbrev=MY;PUBMED_ID=10376304;trait_ID=1044;trait=Milk yield;Coord_src=cM;FlankMarker=AFR227,BM2320;VTO_name=milk amount;CMO_name=milk yield;Map_Type=Linkage;Significance=Significant;F-Stat=2.26
Chr.6	Milk_QTL	85006364	111495252	QTL_ID=2430;Name=Milk yield;Abbrev=MY;PUBMED_ID=10376304;trait_ID=1044;trait=Milk yield;Coord_src=cM;FlankMarker=AFR227,BM2320;VTO_name=milk amount;CMO_name=milk yield;Map_Type=Linkage;Significance=Significant;F-Stat=2.26
Chr.6	Milk_QTL	85006364	111495252	QTL_ID=2430;Name=Milk yield;Abbrev=MY;PUBMED_ID=10376304;trait_ID=1044;trait=Milk yield;Coord_src=cM;FlankMarker=AFR227,BM2320;VTO_name=milk amount;CMO_name=milk yield;Map_Type=Linkage;Significance=Significant;F-Stat=2.26
Chr.6	Milk_QTL	85006364	111495252	QTL_ID=2430;Name=Milk yield;Abbrev=MY;PUBMED_ID=10376304;trait_ID=1044;trait=Milk yield;Coord_src=cM;FlankMarker=AFR227,BM2320;VTO_name=milk amount;CMO_name=milk yield;Map_Type=Linkage;Significance=Significant;F-Stat=2.26
Chr.6	Milk_QTL	85006364	111495252	QTL_ID=2430;Name=Milk yield;Abbrev=MY;PUBMED_ID=10376304;trait_ID=1044;trait=Milk yield;Coord_src=cM;FlankMarker=AFR227,BM2320;VTO_name=milk amount;CMO_name=milk yield;Map_Type=Linkage;Significance=Significant;F-Stat=2.26
Chr.6	Reproduction_QTL	85655000	111495252	QTL_ID=11315;Name=Retained placenta;Abbrev=RETPL;PUBMED_ID=19841231;trait_ID=1276;trait=Retained placenta;Coord_src=cM;FlankMarker=BM4311,BM2320;breed=holstein;VTO_name=parturition trait;Map_Type=Linkage;Model=Mendelian;Test_Base=Chromosome-wise;Significance=Significant;P-value=0.011;F-Stat=2.18
Chr.6	Reproduction_QTL	85655000	111495252	QTL_ID=11315;Name=Retained placenta;Abbrev=RETPL;PUBMED_ID=19841231;trait_ID=1276;trait=Retained placenta;Coord_src=cM;FlankMarker=BM4311,BM2320;breed=holstein;VTO_name=parturition trait;Map_Type=Linkage;Model=Mendelian;Test_Base=Chromosome-wise;Significance=Significant;P-value=0.011;F-Stat=2.18
Chr.6	Reproduction_QTL	85655000	111495252	QTL_ID=11315;Name=Retained placenta;Abbrev=RETPL;PUBMED_ID=19841231;trait_ID=1276;trait=Retained placenta;Coord_src=cM;FlankMarker=BM4311,BM2320;breed=holstein;VTO_name=parturition trait;Map_Type=Linkage;Model=Mendelian;Test_Base=Chromosome-wise;Significance=Significant;P-value=0.011;F-Stat=2.18
Chr.6	Reproduction_QTL	85655000	111495252	QTL_ID=11315;Name=Retained placenta;Abbrev=RETPL;PUBMED_ID=19841231;trait_ID=1276;trait=Retained placenta;Coord_src=cM;FlankMarker=BM4311,BM2320;breed=holstein;VTO_name=parturition trait;Map_Type=Linkage;Model=Mendelian;Test_Base=Chromosome-wise;Significance=Significant;P-value=0.011;F-Stat=2.18
Chr.6	Reproduction_QTL	85655000	111495252	QTL_ID=11315;Name=Retained placenta;Abbrev=RETPL;PUBMED_ID=19841231;trait_ID=1276;trait=Retained placenta;Coord_src=cM;FlankMarker=BM4311,BM2320;breed=holstein;VTO_name=parturition trait;Map_Type=Linkage;Model=Mendelian;Test_Base=Chromosome-wise;Significance=Significant;P-value=0.011;F-Stat=2.18
Chr.6	Exterior_QTL	86329932	111495252	QTL_ID=10286;Name=Udder height;Abbrev=UHT;PUBMED_ID=15377635;trait_ID=1139;trait=Udder height;Coord_src=cM;FlankMarker=BP7,BM2320;breed=holstein;VTO_name=udder morphology trait;CMO_name=udder height;Map_Type=Linkage;Model=n/a;Significance=Significant;P-value=0.002
Chr.6	Exterior_QTL	86329932	111495252	QTL_ID=10286;Name=Udder height;Abbrev=UHT;PUBMED_ID=15377635;trait_ID=1139;trait=Udder height;Coord_src=cM;FlankMarker=BP7,BM2320;breed=holstein;VTO_name=udder morphology trait;CMO_name=udder height;Map_Type=Linkage;Model=n/a;Significance=Significant;P-value=0.002
Chr.6	Exterior_QTL	86329932	111495252	QTL_ID=10286;Name=Udder height;Abbrev=UHT;PUBMED_ID=15377635;trait_ID=1139;trait=Udder height;Coord_src=cM;FlankMarker=BP7,BM2320;breed=holstein;VTO_name=udder morphology trait;CMO_name=udder height;Map_Type=Linkage;Model=n/a;Significance=Significant;P-value=0.002
Chr.6	Exterior_QTL	86329932	111495252	QTL_ID=10286;Name=Udder height;Abbrev=UHT;PUBMED_ID=15377635;trait_ID=1139;trait=Udder height;Coord_src=cM;FlankMarker=BP7,BM2320;breed=holstein;VTO_name=udder morphology trait;CMO_name=udder height;Map_Type=Linkage;Model=n/a;Significance=Significant;P-value=0.002
Chr.6	Exterior_QTL	86329932	111495252	QTL_ID=10286;Name=Udder height;Abbrev=UHT;PUBMED_ID=15377635;trait_ID=1139;trait=Udder height;Coord_src=cM;FlankMarker=BP7,BM2320;breed=holstein;VTO_name=udder morphology trait;CMO_name=udder height;Map_Type=Linkage;Model=n/a;Significance=Significant;P-value=0.002
Chr.6	Milk_QTL	86329932	104307665	QTL_ID=1518;Name=Milk fat yield;Abbrev=FY;PUBMED_ID=16533362;trait_ID=1039;trait=Milk fat yield;Coord_src=cM;FlankMarker=BP7,BMC4203;VTO_name=milk fat amount;PTO_name=milk fat yield;CMO_name=milk fat yield;Map_Type=Linkage;Significance=Significant;P-value=<0.01
Chr.6	Milk_QTL	86329932	104307665	QTL_ID=1518;Name=Milk fat yield;Abbrev=FY;PUBMED_ID=16533362;trait_ID=1039;trait=Milk fat yield;Coord_src=cM;FlankMarker=BP7,BMC4203;VTO_name=milk fat amount;PTO_name=milk fat yield;CMO_name=milk fat yield;Map_Type=Linkage;Significance=Significant;P-value=<0.01
Chr.6	Milk_QTL	86329932	104307665	QTL_ID=1518;Name=Milk fat yield;Abbrev=FY;PUBMED_ID=16533362;trait_ID=1039;trait=Milk fat yield;Coord_src=cM;FlankMarker=BP7,BMC4203;VTO_name=milk fat amount;PTO_name=milk fat yield;CMO_name=milk fat yield;Map_Type=Linkage;Significance=Significant;P-value=<0.01
Chr.6	Milk_QTL	86329932	104307665	QTL_ID=1518;Name=Milk fat yield;Abbrev=FY;PUBMED_ID=16533362;trait_ID=1039;trait=Milk fat yield;Coord_src=cM;FlankMarker=BP7,BMC4203;VTO_name=milk fat amount;PTO_name=milk fat yield;CMO_name=milk fat yield;Map_Type=Linkage;Significance=Significant;P-value=<0.01
Chr.6	Milk_QTL	86329932	104307665	QTL_ID=1518;Name=Milk fat yield;Abbrev=FY;PUBMED_ID=16533362;trait_ID=1039;trait=Milk fat yield;Coord_src=cM;FlankMarker=BP7,BMC4203;VTO_name=milk fat amount;PTO_name=milk fat yield;CMO_name=milk fat yield;Map_Type=Linkage;Significance=Significant;P-value=<0.01
Chr.6	Milk_QTL	87048690	111495252	QTL_ID=3742;Name=Milk fat yield;Abbrev=FY;PUBMED_ID=11167525;trait_ID=1039;trait=Milk fat yield;Coord_src=cM;FlankMarker=BMS511,BM2320;VTO_name=milk fat amount;PTO_name=milk fat yield;CMO_name=milk fat yield;Map_Type=Linkage;Test_Base=-;Significance=-;F-Stat=0.33;Additive_Effect=-1.9
Chr.6	Milk_QTL	87048690	111495252	QTL_ID=3742;Name=Milk fat yield;Abbrev=FY;PUBMED_ID=11167525;trait_ID=1039;trait=Milk fat yield;Coord_src=cM;FlankMarker=BMS511,BM2320;VTO_name=milk fat amount;PTO_name=milk fat yield;CMO_name=milk fat yield;Map_Type=Linkage;Test_Base=-;Significance=-;F-Stat=0.33;Additive_Effect=-1.9
Chr.6	Milk_QTL	87048690	111495252	QTL_ID=3742;Name=Milk fat yield;Abbrev=FY;PUBMED_ID=11167525;trait_ID=1039;trait=Milk fat yield;Coord_src=cM;FlankMarker=BMS511,BM2320;VTO_name=milk fat amount;PTO_name=milk fat yield;CMO_name=milk fat yield;Map_Type=Linkage;Test_Base=-;Significance=-;F-Stat=0.33;Additive_Effect=-1.9
Chr.6	Milk_QTL	87048690	111495252	QTL_ID=3742;Name=Milk fat yield;Abbrev=FY;PUBMED_ID=11167525;trait_ID=1039;trait=Milk fat yield;Coord_src=cM;FlankMarker=BMS511,BM2320;VTO_name=milk fat amount;PTO_name=milk fat yield;CMO_name=milk fat yield;Map_Type=Linkage;Test_Base=-;Significance=-;F-Stat=0.33;Additive_Effect=-1.9
Chr.6	Milk_QTL	87048690	111495252	QTL_ID=3742;Name=Milk fat yield;Abbrev=FY;PUBMED_ID=11167525;trait_ID=1039;trait=Milk fat yield;Coord_src=cM;FlankMarker=BMS511,BM2320;VTO_name=milk fat amount;PTO_name=milk fat yield;CMO_name=milk fat yield;Map_Type=Linkage;Test_Base=-;Significance=-;F-Stat=0.33;Additive_Effect=-1.9
Chr.6	Meat_and_Carcass_QTL	88880649	103431130	QTL_ID=10777;Name=Marbling score;Abbrev=MARBL;PUBMED_ID=20477797;trait_ID=1027;trait=Marbling score;Coord_src=cM;FlankMarker=BM8124,BM8124,BMS5029;breed=Angus;VTO_name=intramuscular adipose amount;PTO_name=intramuscular fat content;Map_Type=Linkage;Model=Mendelian;Test_Base=Genome-wise;Significance=Significant;P-value=0.002238721139;Bayes-value=18;Dominance_Effect=0.0124
Chr.6	Meat_and_Carcass_QTL	88880649	117806304	QTL_ID=10779;Name=Carcass weight;Abbrev=CWT;PUBMED_ID=20477797;trait_ID=1022;trait=Carcass weight;Coord_src=cM;FlankMarker=BM8124,BMC4203,#;breed=Angus;PTO_name=dressed carcass weight;CMO_name=carcass weight;Map_Type=Linkage;Model=Mendelian;Test_Base=Chromosome-wise;Significance=Significant;P-value=0.000398107171;Dominance_Effect=0.0108
Chr.6	Meat_and_Carcass_QTL	88880649	103431130	QTL_ID=10777;Name=Marbling score;Abbrev=MARBL;PUBMED_ID=20477797;trait_ID=1027;trait=Marbling score;Coord_src=cM;FlankMarker=BM8124,BM8124,BMS5029;breed=Angus;VTO_name=intramuscular adipose amount;PTO_name=intramuscular fat content;Map_Type=Linkage;Model=Mendelian;Test_Base=Genome-wise;Significance=Significant;P-value=0.002238721139;Bayes-value=18;Dominance_Effect=0.0124
Chr.6	Meat_and_Carcass_QTL	88880649	117806304	QTL_ID=10779;Name=Carcass weight;Abbrev=CWT;PUBMED_ID=20477797;trait_ID=1022;trait=Carcass weight;Coord_src=cM;FlankMarker=BM8124,BMC4203,#;breed=Angus;PTO_name=dressed carcass weight;CMO_name=carcass weight;Map_Type=Linkage;Model=Mendelian;Test_Base=Chromosome-wise;Significance=Significant;P-value=0.000398107171;Dominance_Effect=0.0108
Chr.6	Meat_and_Carcass_QTL	88880649	103431130	QTL_ID=10777;Name=Marbling score;Abbrev=MARBL;PUBMED_ID=20477797;trait_ID=1027;trait=Marbling score;Coord_src=cM;FlankMarker=BM8124,BM8124,BMS5029;breed=Angus;VTO_name=intramuscular adipose amount;PTO_name=intramuscular fat content;Map_Type=Linkage;Model=Mendelian;Test_Base=Genome-wise;Significance=Significant;P-value=0.002238721139;Bayes-value=18;Dominance_Effect=0.0124
Chr.6	Meat_and_Carcass_QTL	88880649	117806304	QTL_ID=10779;Name=Carcass weight;Abbrev=CWT;PUBMED_ID=20477797;trait_ID=1022;trait=Carcass weight;Coord_src=cM;FlankMarker=BM8124,BMC4203,#;breed=Angus;PTO_name=dressed carcass weight;CMO_name=carcass weight;Map_Type=Linkage;Model=Mendelian;Test_Base=Chromosome-wise;Significance=Significant;P-value=0.000398107171;Dominance_Effect=0.0108
Chr.6	Meat_and_Carcass_QTL	88880649	103431130	QTL_ID=10777;Name=Marbling score;Abbrev=MARBL;PUBMED_ID=20477797;trait_ID=1027;trait=Marbling score;Coord_src=cM;FlankMarker=BM8124,BM8124,BMS5029;breed=Angus;VTO_name=intramuscular adipose amount;PTO_name=intramuscular fat content;Map_Type=Linkage;Model=Mendelian;Test_Base=Genome-wise;Significance=Significant;P-value=0.002238721139;Bayes-value=18;Dominance_Effect=0.0124
Chr.6	Meat_and_Carcass_QTL	88880649	117806304	QTL_ID=10779;Name=Carcass weight;Abbrev=CWT;PUBMED_ID=20477797;trait_ID=1022;trait=Carcass weight;Coord_src=cM;FlankMarker=BM8124,BMC4203,#;breed=Angus;PTO_name=dressed carcass weight;CMO_name=carcass weight;Map_Type=Linkage;Model=Mendelian;Test_Base=Chromosome-wise;Significance=Significant;P-value=0.000398107171;Dominance_Effect=0.0108
Chr.6	Meat_and_Carcass_QTL	88880649	103431130	QTL_ID=10777;Name=Marbling score;Abbrev=MARBL;PUBMED_ID=20477797;trait_ID=1027;trait=Marbling score;Coord_src=cM;FlankMarker=BM8124,BM8124,BMS5029;breed=Angus;VTO_name=intramuscular adipose amount;PTO_name=intramuscular fat content;Map_Type=Linkage;Model=Mendelian;Test_Base=Genome-wise;Significance=Significant;P-value=0.002238721139;Bayes-value=18;Dominance_Effect=0.0124
Chr.6	Meat_and_Carcass_QTL	88880649	117806304	QTL_ID=10779;Name=Carcass weight;Abbrev=CWT;PUBMED_ID=20477797;trait_ID=1022;trait=Carcass weight;Coord_src=cM;FlankMarker=BM8124,BMC4203,#;breed=Angus;PTO_name=dressed carcass weight;CMO_name=carcass weight;Map_Type=Linkage;Model=Mendelian;Test_Base=Chromosome-wise;Significance=Significant;P-value=0.000398107171;Dominance_Effect=0.0108
Chr.6	Reproduction_QTL	88880649	104307665	QTL_ID=1681;Name=Calving ease;Abbrev=CALEASE;PUBMED_ID=16167984;trait_ID=1073;trait=Calving ease;Coord_src=cM;FlankMarker=BM8124,BMC4203;VTO_name=parturition trait;Map_Type=Linkage;Significance=Significant;F-Stat=16.70;Additive_Effect=1.15
Chr.6	Reproduction_QTL	88880649	104307665	QTL_ID=1681;Name=Calving ease;Abbrev=CALEASE;PUBMED_ID=16167984;trait_ID=1073;trait=Calving ease;Coord_src=cM;FlankMarker=BM8124,BMC4203;VTO_name=parturition trait;Map_Type=Linkage;Significance=Significant;F-Stat=16.70;Additive_Effect=1.15
Chr.6	Reproduction_QTL	88880649	104307665	QTL_ID=1681;Name=Calving ease;Abbrev=CALEASE;PUBMED_ID=16167984;trait_ID=1073;trait=Calving ease;Coord_src=cM;FlankMarker=BM8124,BMC4203;VTO_name=parturition trait;Map_Type=Linkage;Significance=Significant;F-Stat=16.70;Additive_Effect=1.15
Chr.6	Reproduction_QTL	88880649	104307665	QTL_ID=1681;Name=Calving ease;Abbrev=CALEASE;PUBMED_ID=16167984;trait_ID=1073;trait=Calving ease;Coord_src=cM;FlankMarker=BM8124,BMC4203;VTO_name=parturition trait;Map_Type=Linkage;Significance=Significant;F-Stat=16.70;Additive_Effect=1.15
Chr.6	Reproduction_QTL	88880649	104307665	QTL_ID=1681;Name=Calving ease;Abbrev=CALEASE;PUBMED_ID=16167984;trait_ID=1073;trait=Calving ease;Coord_src=cM;FlankMarker=BM8124,BMC4203;VTO_name=parturition trait;Map_Type=Linkage;Significance=Significant;F-Stat=16.70;Additive_Effect=1.15
Chr.6	Milk_QTL	90283105	109479221	QTL_ID=3437;Name=Milking speed;Abbrev=MSPD;PUBMED_ID=12605852;trait_ID=1099;trait=Milking speed;Coord_src=cM;FlankMarker=BM2320;VTO_name=milk flow trait;Map_Type=Linkage;Test_Base=chromosome-wise;P-value=0.008
Chr.6	Milk_QTL	90283105	109479221	QTL_ID=3437;Name=Milking speed;Abbrev=MSPD;PUBMED_ID=12605852;trait_ID=1099;trait=Milking speed;Coord_src=cM;FlankMarker=BM2320;VTO_name=milk flow trait;Map_Type=Linkage;Test_Base=chromosome-wise;P-value=0.008
Chr.6	Milk_QTL	90283105	109479221	QTL_ID=3437;Name=Milking speed;Abbrev=MSPD;PUBMED_ID=12605852;trait_ID=1099;trait=Milking speed;Coord_src=cM;FlankMarker=BM2320;VTO_name=milk flow trait;Map_Type=Linkage;Test_Base=chromosome-wise;P-value=0.008
Chr.6	Milk_QTL	90283105	109479221	QTL_ID=3437;Name=Milking speed;Abbrev=MSPD;PUBMED_ID=12605852;trait_ID=1099;trait=Milking speed;Coord_src=cM;FlankMarker=BM2320;VTO_name=milk flow trait;Map_Type=Linkage;Test_Base=chromosome-wise;P-value=0.008
Chr.6	Milk_QTL	90283105	109479221	QTL_ID=3437;Name=Milking speed;Abbrev=MSPD;PUBMED_ID=12605852;trait_ID=1099;trait=Milking speed;Coord_src=cM;FlankMarker=BM2320;VTO_name=milk flow trait;Map_Type=Linkage;Test_Base=chromosome-wise;P-value=0.008
Chr.6	Milk_QTL	93789245	104307665	QTL_ID=19929;Name=Milk lactose content;Abbrev=MLC;PUBMED_ID=22058003;trait_ID=1378;trait=Milk lactose content;Coord_src=cM;breed=gir;VTO_name=milk lactose amount;PTO_name=milk lactose content;Map_Type=Linkage;Model=Mendelian;Test_Base=Chromosome-wise;Significance=Significant;P-value=<0.01;F-Stat=9.02
Chr.6	Milk_QTL	93789245	104307665	QTL_ID=19929;Name=Milk lactose content;Abbrev=MLC;PUBMED_ID=22058003;trait_ID=1378;trait=Milk lactose content;Coord_src=cM;breed=gir;VTO_name=milk lactose amount;PTO_name=milk lactose content;Map_Type=Linkage;Model=Mendelian;Test_Base=Chromosome-wise;Significance=Significant;P-value=<0.01;F-Stat=9.02
Chr.6	Milk_QTL	93789245	104307665	QTL_ID=19929;Name=Milk lactose content;Abbrev=MLC;PUBMED_ID=22058003;trait_ID=1378;trait=Milk lactose content;Coord_src=cM;breed=gir;VTO_name=milk lactose amount;PTO_name=milk lactose content;Map_Type=Linkage;Model=Mendelian;Test_Base=Chromosome-wise;Significance=Significant;P-value=<0.01;F-Stat=9.02
Chr.6	Milk_QTL	93789245	104307665	QTL_ID=19929;Name=Milk lactose content;Abbrev=MLC;PUBMED_ID=22058003;trait_ID=1378;trait=Milk lactose content;Coord_src=cM;breed=gir;VTO_name=milk lactose amount;PTO_name=milk lactose content;Map_Type=Linkage;Model=Mendelian;Test_Base=Chromosome-wise;Significance=Significant;P-value=<0.01;F-Stat=9.02
Chr.6	Milk_QTL	93789245	104307665	QTL_ID=19929;Name=Milk lactose content;Abbrev=MLC;PUBMED_ID=22058003;trait_ID=1378;trait=Milk lactose content;Coord_src=cM;breed=gir;VTO_name=milk lactose amount;PTO_name=milk lactose content;Map_Type=Linkage;Model=Mendelian;Test_Base=Chromosome-wise;Significance=Significant;P-value=<0.01;F-Stat=9.02
Chr.6	Meat_and_Carcass_QTL	102716789	102881084	QTL_ID=223742;Name=Longissimus muscle area;Abbrev=LMA;PUBMED_ID=32180796;trait_ID=1090;trait=Longissimus muscle area;Coord_src=Reported Coordinates;breed=Tropical Composite;VTO_name=longissimus thoracis muscle area;Map_Type=Genome;Model=-;Test_Base=-;Significance=Significant;Variance=>1.0%
Chr.7	Milk_QTL	0	93365497	QTL_ID=21539;Name=Milk beta-casein percentage;Abbrev=MBCASP;PUBMED_ID=19397519;trait_ID=1418;trait=Milk beta-casein percentage;Coord_src=cM;breed=holstein;VTO_name=milk beta-casein amount;PTO_name=milk beta-casein content;CMO_name=milk beta-casein percentage;Map_Type=Linkage;Model=-;Test_Base=Genome-wise;Significance=Suggestive;P-value=0.038;F-Stat=2.98
Chr.7	Milk_QTL	0	93365497	QTL_ID=21539;Name=Milk beta-casein percentage;Abbrev=MBCASP;PUBMED_ID=19397519;trait_ID=1418;trait=Milk beta-casein percentage;Coord_src=cM;breed=holstein;VTO_name=milk beta-casein amount;PTO_name=milk beta-casein content;CMO_name=milk beta-casein percentage;Map_Type=Linkage;Model=-;Test_Base=Genome-wise;Significance=Suggestive;P-value=0.038;F-Stat=2.98
Chr.7	Health_QTL	4574337	94754136	QTL_ID=9916;Name=Tick resistance;Abbrev=TICKR;PUBMED_ID=17894560;trait_ID=1238;trait=Tick resistance;Coord_src=cM;breed=gir,holstein;VTO_name=response to parasitic infection trait;Map_Type=Linkage;Model=Mendelian;Test_Base=Chromosome-wise;Significance=Suggestive;LOD-score=1.935;P-value=<0.10;F-Stat=4.52
Chr.7	Health_QTL	4574337	94754136	QTL_ID=9916;Name=Tick resistance;Abbrev=TICKR;PUBMED_ID=17894560;trait_ID=1238;trait=Tick resistance;Coord_src=cM;breed=gir,holstein;VTO_name=response to parasitic infection trait;Map_Type=Linkage;Model=Mendelian;Test_Base=Chromosome-wise;Significance=Suggestive;LOD-score=1.935;P-value=<0.10;F-Stat=4.52
Chr.7	Exterior_QTL	11435844	98021520	QTL_ID=3449;Name=Heel depth;Abbrev=HDPTH;PUBMED_ID=12605852;trait_ID=1151;trait=Heel depth;Coord_src=cM;FlankMarker=BM741;VTO_name=heel depth;Map_Type=Linkage;P-value=0.008
Chr.7	Exterior_QTL	11435844	98021520	QTL_ID=3449;Name=Heel depth;Abbrev=HDPTH;PUBMED_ID=12605852;trait_ID=1151;trait=Heel depth;Coord_src=cM;FlankMarker=BM741;VTO_name=heel depth;Map_Type=Linkage;P-value=0.008
Chr.7	Reproduction_QTL	20421150	57996066	QTL_ID=9927;Name=Sperm motility;Abbrev=SPMOT;PUBMED_ID=19630877;trait_ID=1084;trait=Sperm motility;Coord_src=cM;breed=holstein;VTO_name=sperm motility trait;Map_Type=Linkage;Model=Mendelian;Test_Base=Comparison-wise;Significance=Significant;P-value=0.0402;Likelihood_Ratio=6.43
Chr.7	Exterior_QTL	20739719	69693300	QTL_ID=7132;Name=Social separation--Vocalization;Abbrev=SSVO;PUBMED_ID=18784067;trait_ID=1236;trait=Social separation--Vocalization;Coord_src=cM;FlankMarker=RM006,BM1853;breed=charolais,holstein;VTO_name=conspecific interaction trait;Map_Type=Linkage;Model=Mendelian;Test_Base=Chromosome-wise;Significance=Significant;P-value=0.0499;F-Stat=4.59;Variance=3.77;Dominance_Effect=1.04;Additive_Effect=0.…
Chr.7	Exterior_QTL	20739719	69693300	QTL_ID=7132;Name=Social separation--Vocalization;Abbrev=SSVO;PUBMED_ID=18784067;trait_ID=1236;trait=Social separation--Vocalization;Coord_src=cM;FlankMarker=RM006,BM1853;breed=charolais,holstein;VTO_name=conspecific interaction trait;Map_Type=Linkage;Model=Mendelian;Test_Base=Chromosome-wise;Significance=Significant;P-value=0.0499;F-Stat=4.59;Variance=3.77;Dominance_Effect=1.04;Additive_Effect=0.…
Chr.7	Meat_and_Carcass_QTL	35941224	57996066	QTL_ID=1327;Name=Fat thickness at the 12th rib;Abbrev=FATTH;PUBMED_ID=14677852;trait_ID=1275;trait=Fat thickness at the 12th rib;Coord_src=cM;VTO_name=subcutaneous adipose thickness;CMO_name=back fat thickness;Map_Type=Linkage;F-Stat=15.0;Additive_Effect=-0.18
Chr.7	Milk_QTL	42475992	80867754	QTL_ID=3434;Name=Milk fat percentage;Abbrev=FP;PUBMED_ID=12605852;trait_ID=1037;trait=Milk fat percentage;Coord_src=cM;FlankMarker=INRABER19;VTO_name=milk fat amount;PTO_name=milk fat content;CMO_name=milk fat percentage;Map_Type=Linkage;P-value=0.004;gene_ID=19122;gene_IDsrc=NCBIgene
Chr.7	Milk_QTL	42475992	80867754	QTL_ID=3434;Name=Milk fat percentage;Abbrev=FP;PUBMED_ID=12605852;trait_ID=1037;trait=Milk fat percentage;Coord_src=cM;FlankMarker=INRABER19;VTO_name=milk fat amount;PTO_name=milk fat content;CMO_name=milk fat percentage;Map_Type=Linkage;P-value=0.004;gene_ID=19122;gene_IDsrc=NCBIgene
Chr.7	Reproduction_QTL	42582181	63052342	QTL_ID=4656;Name=Stillbirth;Abbrev=SB;PUBMED_ID=18420641;trait_ID=1153;trait=Stillbirth;Coord_src=cM;FlankMarker=BMS2258;VTO_name=stillborn offspring quantity;Map_Type=Linkage;Model=Mendelian;Test_Base=Chromosome-wise;Significance=Significant;P-value=0.003
Chr.7	Milk_QTL	45678028	103902811	QTL_ID=10290;Name=Milking speed;Abbrev=MSPD;PUBMED_ID=15377635;trait_ID=1099;trait=Milking speed;Coord_src=cM;FlankMarker=TGLA164;breed=holstein;VTO_name=milk flow trait;Map_Type=Linkage;Model=n/a;Significance=Significant;P-value=0.010
Chr.7	Milk_QTL	45678028	103902811	QTL_ID=10290;Name=Milking speed;Abbrev=MSPD;PUBMED_ID=15377635;trait_ID=1099;trait=Milking speed;Coord_src=cM;FlankMarker=TGLA164;breed=holstein;VTO_name=milk flow trait;Map_Type=Linkage;Model=n/a;Significance=Significant;P-value=0.010
Chr.7	Milk_QTL	45678028	103902811	QTL_ID=10290;Name=Milking speed;Abbrev=MSPD;PUBMED_ID=15377635;trait_ID=1099;trait=Milking speed;Coord_src=cM;FlankMarker=TGLA164;breed=holstein;VTO_name=milk flow trait;Map_Type=Linkage;Model=n/a;Significance=Significant;P-value=0.010
Chr.7	Health_QTL	46772601	58845585	QTL_ID=10516;Name=PCVF minus PCVM;Abbrev=PCVFM;PUBMED_ID=12805560;trait_ID=1017;trait=PCVF minus PCVM;Coord_src=cM;FlankMarker=BM7247,DIK050;breed=boran,n'dama;CMO_name=hematocrit;Map_Type=Linkage;Model=Mendelian;Test_Base=Chromosome-wise;Significance=Significant;LOD-score=2.08;P-value=0.0280;Variance=10.0
Chr.7	Health_QTL	50840495	63052342	QTL_ID=2667;Name=Somatic cell score;Abbrev=SCS;PUBMED_ID=14762090;trait_ID=1005;trait=Somatic cell score;Coord_src=cM;FlankMarker=BM6117,BMS2258;VTO_name=milk somatic cell quantity;PTO_name=milk somatic cell count;CMO_name=milk somatic cell score;Map_Type=Linkage;Significance=Significant;F-Stat=8.8
Chr.7	Meat_and_Carcass_QTL	53340043	74087932	QTL_ID=10798;Name=Longissimus muscle area;Abbrev=LMA;PUBMED_ID=20477797;trait_ID=1090;trait=Longissimus muscle area;Coord_src=cM;FlankMarker=BMS2840,BMS2258,BMS1331;breed=Angus;VTO_name=longissimus thoracis muscle area;Map_Type=Linkage;Model=Mendelian;Test_Base=Chromosome-wise;Significance=Significant;P-value=0.001174897555;Dominance_Effect=0.007
Chr.7	Meat_and_Carcass_QTL	53340043	74087932	QTL_ID=10798;Name=Longissimus muscle area;Abbrev=LMA;PUBMED_ID=20477797;trait_ID=1090;trait=Longissimus muscle area;Coord_src=cM;FlankMarker=BMS2840,BMS2258,BMS1331;breed=Angus;VTO_name=longissimus thoracis muscle area;Map_Type=Linkage;Model=Mendelian;Test_Base=Chromosome-wise;Significance=Significant;P-value=0.001174897555;Dominance_Effect=0.007
Chr.7	Production_QTL	53340043	63052342	QTL_ID=10797;Name=Body weight (weaning);Abbrev=WWT;PUBMED_ID=20477797;trait_ID=1063;trait=Body weight (weaning);Coord_src=cM;FlankMarker=BMS2840,BMS2258,BMS2258;breed=Angus;VTO_name=body mass;CMO_name=body weight;Map_Type=Linkage;Model=Mendelian;Test_Base=Genome-wise;Significance=Significant;Bayes-value=32;Dominance_Effect=0.0405
Chr.7	Milk_QTL	57996066	73516140	QTL_ID=3410;Name=Milk protein yield;Abbrev=PY;PUBMED_ID=12605852;trait_ID=1042;trait=Milk protein yield;Coord_src=cM;FlankMarker=INRABERN1;VTO_name=milk protein amount;PTO_name=milk protein yield;CMO_name=milk protein yield;Map_Type=Linkage;P-value=0.0029;gene_ID=19122;gene_IDsrc=NCBIgene
Chr.7	Milk_QTL	57996066	75149832	QTL_ID=3432;Name=Milk yield;Abbrev=MY;PUBMED_ID=12605852;trait_ID=1044;trait=Milk yield;Coord_src=cM;FlankMarker=INRABER19;VTO_name=milk amount;CMO_name=milk yield;Map_Type=Linkage;P-value=0.009;gene_ID=19122;gene_IDsrc=NCBIgene
Chr.7	Meat_and_Carcass_QTL	63052342	69693300	QTL_ID=10799;Name=Marbling score;Abbrev=MARBL;PUBMED_ID=20477797;trait_ID=1027;trait=Marbling score;Coord_src=cM;FlankMarker=BMS2258,BM1853,BM1853;breed=Angus;VTO_name=intramuscular adipose amount;PTO_name=intramuscular fat content;Map_Type=Linkage;Model=Mendelian;Test_Base=Chromosome-wise;Significance=Significant;P-value=0.001023292992;Dominance_Effect=0.0307
Chr.7	Meat_and_Carcass_QTL	63052342	74087932	QTL_ID=10800;Name=Carcass weight;Abbrev=CWT;PUBMED_ID=20477797;trait_ID=1022;trait=Carcass weight;Coord_src=cM;FlankMarker=BMS2258,BM1853,BMS1331;breed=Angus;PTO_name=dressed carcass weight;CMO_name=carcass weight;Map_Type=Linkage;Model=Mendelian;Test_Base=Chromosome-wise;Significance=Significant;P-value=0.002754228703;Dominance_Effect=0.0131
Chr.7	Production_QTL	63052342	67365289	QTL_ID=2665;Name=Length of productive life;Abbrev=PL;PUBMED_ID=14762090;trait_ID=1067;trait=Length of productive life;Coord_src=cM;FlankMarker=BMS2258,INRA192;VTO_name=life span trait;Map_Type=Linkage;Significance=Significant;F-Stat=9.9
Chr.7	Reproduction_QTL	63052342	78360036	QTL_ID=5004;Name=Heat intensity;Abbrev=HTINT;PUBMED_ID=19389971;trait_ID=1154;trait=Heat intensity;Coord_src=cM;FlankMarker=BMS2258,AE129;breed=holstein;VTO_name=estrus intensity;Map_Type=Linkage;Model=Mendelian;Test_Base=Chromosome-wise;Significance=Significant;P-value=0.006
Chr.7	Health_QTL	63055610	78360036	QTL_ID=2698;Name=Somatic cell count;Abbrev=SCC;PUBMED_ID=12613879;trait_ID=1004;trait=Somatic cell count;Coord_src=cM;FlankMarker=BMS2258,OARAE129;VTO_name=milk somatic cell quantity;PTO_name=milk somatic cell count;CMO_name=milk somatic cell count;Map_Type=Linkage;Significance=Significant;P-value=0.025;gene_ID=100308992;gene_IDsrc=NCBIgene
Chr.7	Production_QTL	82583130	109293994	QTL_ID=10810;Name=Body weight (birth);Abbrev=BW;PUBMED_ID=20477797;trait_ID=1054;trait=Body weight (birth);Coord_src=cM;FlankMarker=BM9065,BMS1979,BMS1247;breed=Angus;VTO_name=body mass;CMO_name=body weight;Map_Type=Linkage;Model=Mendelian;Test_Base=Genome-wise;Significance=Significant;P-value=0.006025595861;Dominance_Effect=0.024
Chr.7	Production_QTL	82583130	109293994	QTL_ID=10810;Name=Body weight (birth);Abbrev=BW;PUBMED_ID=20477797;trait_ID=1054;trait=Body weight (birth);Coord_src=cM;FlankMarker=BM9065,BMS1979,BMS1247;breed=Angus;VTO_name=body mass;CMO_name=body weight;Map_Type=Linkage;Model=Mendelian;Test_Base=Genome-wise;Significance=Significant;P-value=0.006025595861;Dominance_Effect=0.024
Chr.7	Meat_and_Carcass_QTL	103085965	110682633	QTL_ID=10812;Name=Marbling score;Abbrev=MARBL;PUBMED_ID=20477797;trait_ID=1027;trait=Marbling score;Coord_src=cM;FlankMarker=BMS1979,BMS1247,BL1043;breed=Angus;VTO_name=intramuscular adipose amount;PTO_name=intramuscular fat content;Map_Type=Linkage;Model=Mendelian;Test_Base=Chromosome-wise;Significance=Significant;P-value=0.002951209227;Dominance_Effect=0.0285
Chr.7	Meat_and_Carcass_QTL	103085965	110682633	QTL_ID=10812;Name=Marbling score;Abbrev=MARBL;PUBMED_ID=20477797;trait_ID=1027;trait=Marbling score;Coord_src=cM;FlankMarker=BMS1979,BMS1247,BL1043;breed=Angus;VTO_name=intramuscular adipose amount;PTO_name=intramuscular fat content;Map_Type=Linkage;Model=Mendelian;Test_Base=Chromosome-wise;Significance=Significant;P-value=0.002951209227;Dominance_Effect=0.0285
Chr.8	Production_QTL	881180	9992581	QTL_ID=10821;Name=Body weight (weaning);Abbrev=WWT;PUBMED_ID=20477797;trait_ID=1063;trait=Body weight (weaning);Coord_src=cM;FlankMarker=#,IDVGA11,IDVGA11;breed=Angus;VTO_name=body mass;CMO_name=body weight;Map_Type=Linkage;Model=Mendelian;Test_Base=Genome-wise;Significance=Significant;Bayes-value=28;Dominance_Effect=0.1745
Chr.8	Production_QTL	881180	18628145	QTL_ID=10820;Name=Height (mature);Abbrev=MHT;PUBMED_ID=20477797;trait_ID=1272;trait=Height (mature);Coord_src=cM;FlankMarker=#,IDVGA11,RM372;breed=Angus;VTO_name=body height;CMO_name=body height;Map_Type=Linkage;Model=Mendelian;Test_Base=Genome-wise;Significance=Significant;P-value=0.013182567386;Bayes-value=21;Dominance_Effect=0.0738
Chr.8	Production_QTL	881180	9992581	QTL_ID=10821;Name=Body weight (weaning);Abbrev=WWT;PUBMED_ID=20477797;trait_ID=1063;trait=Body weight (weaning);Coord_src=cM;FlankMarker=#,IDVGA11,IDVGA11;breed=Angus;VTO_name=body mass;CMO_name=body weight;Map_Type=Linkage;Model=Mendelian;Test_Base=Genome-wise;Significance=Significant;Bayes-value=28;Dominance_Effect=0.1745
Chr.8	Production_QTL	881180	18628145	QTL_ID=10820;Name=Height (mature);Abbrev=MHT;PUBMED_ID=20477797;trait_ID=1272;trait=Height (mature);Coord_src=cM;FlankMarker=#,IDVGA11,RM372;breed=Angus;VTO_name=body height;CMO_name=body height;Map_Type=Linkage;Model=Mendelian;Test_Base=Genome-wise;Significance=Significant;P-value=0.013182567386;Bayes-value=21;Dominance_Effect=0.0738
Chr.8	Meat_and_Carcass_QTL	2365087	15861240	QTL_ID=2547;Name=Marbling score;Abbrev=MARBL;PUBMED_ID=11325189;trait_ID=1027;trait=Marbling score;Coord_src=cM;FlankMarker=BMS1864;VTO_name=intramuscular adipose amount;PTO_name=intramuscular fat content;Map_Type=Linkage;Significance=Suggestive;F-Stat=13.4;Additive_Effect=29.9
Chr.8	Meat_and_Carcass_QTL	2365087	15861240	QTL_ID=2547;Name=Marbling score;Abbrev=MARBL;PUBMED_ID=11325189;trait_ID=1027;trait=Marbling score;Coord_src=cM;FlankMarker=BMS1864;VTO_name=intramuscular adipose amount;PTO_name=intramuscular fat content;Map_Type=Linkage;Significance=Suggestive;F-Stat=13.4;Additive_Effect=29.9
Chr.8	Meat_and_Carcass_QTL	5287080	26435400	QTL_ID=2546;Name=Fat thickness at the 12th rib;Abbrev=FATTH;PUBMED_ID=11325189;trait_ID=1275;trait=Fat thickness at the 12th rib;Coord_src=cM;VTO_name=subcutaneous adipose thickness;CMO_name=back fat thickness;Map_Type=Linkage;F-Stat=13.1;Additive_Effect=0.16
Chr.8	Meat_and_Carcass_QTL	5287080	26435400	QTL_ID=2546;Name=Fat thickness at the 12th rib;Abbrev=FATTH;PUBMED_ID=11325189;trait_ID=1275;trait=Fat thickness at the 12th rib;Coord_src=cM;VTO_name=subcutaneous adipose thickness;CMO_name=back fat thickness;Map_Type=Linkage;F-Stat=13.1;Additive_Effect=0.16
Chr.8	Reproduction_QTL	24012155	47804015	QTL_ID=11443;Name=Stillbirth;Abbrev=SB;PUBMED_ID=12613879;trait_ID=1153;trait=Stillbirth;Coord_src=cM;FlankMarker=MCM64;breed=holstein;VTO_name=stillborn offspring quantity;Map_Type=Linkage;Model=Mendelian;Test_Base=Chromosome-wise;Significance=Significant;P-value=0.035
Chr.8	Milk_QTL	24673040	51108440	QTL_ID=3438;Name=Milking speed;Abbrev=MSPD;PUBMED_ID=12605852;trait_ID=1099;trait=Milking speed;Coord_src=cM;FlankMarker=BMS678;VTO_name=milk flow trait;Map_Type=Linkage;P-value=0.008
Chr.8	Production_QTL	25140065	55540775	QTL_ID=7089;Name=Body length (birth);Abbrev=BL;PUBMED_ID=18791160;trait_ID=1230;trait=Body length (birth);Coord_src=cM;FlankMarker=DIK106,HUJ174;breed=charolais,holstein;VTO_name=body length;CMO_name=body length;Map_Type=Linkage;Model=Mendelian;Test_Base=Chromosome-wise;Significance=Significant;P-value=0.029;F-Stat=5.49;Variance=10.3;Dominance_Effect=-13.91;Additive_Effect=-17.64
Chr.8	Production_QTL	36657088	44155929	QTL_ID=10827;Name=Body weight (mature);Abbrev=MWT;PUBMED_ID=20477797;trait_ID=1271;trait=Body weight (mature);Coord_src=cM;FlankMarker=BMS678,BM4006,BM4006;breed=Angus;VTO_name=body mass;CMO_name=body weight;Map_Type=Linkage;Model=Mendelian;Test_Base=Genome-wise;Significance=Significant;Bayes-value=56;Dominance_Effect=0.0283
Chr.8	Production_QTL	36657088	58184315	QTL_ID=10825;Name=Body weight (birth);Abbrev=BW;PUBMED_ID=20477797;trait_ID=1054;trait=Body weight (birth);Coord_src=cM;FlankMarker=BMS678,BMS678,BMS2072;breed=Angus;VTO_name=body mass;CMO_name=body weight;Map_Type=Linkage;Model=Mendelian;Test_Base=Genome-wise;Significance=Significant;P-value=0.000186208714;Dominance_Effect=0.0348
Chr.8	Health_QTL	41485954	48147675	QTL_ID=10521;Name=Percentage decrease in PCV up to day 100 after challenge;Abbrev=PCVD100;PUBMED_ID=12805560;trait_ID=1020;trait=Percentage decrease in PCV up to day 100 after challenge;Coord_src=cM;FlankMarker=CSSM037,TGLA13;breed=boran,n'dama;CMO_name=hematocrit;Map_Type=Linkage;Model=Mendelian;Test_Base=Chromosome-wise;Significance=Significant;LOD-score=1.89;P-value=0.0300;Variance=7.1;Additiv…
Chr.8	Health_QTL	41486835	74759311	QTL_ID=2497;Name=Clinical mastitis;Abbrev=CM;PUBMED_ID=11845286;trait_ID=1146;trait=Clinical mastitis;Coord_src=cM;FlankMarker=CSSM37,HEL9;CMO_name=disease incidence/prevalence measurement;Map_Type=Linkage;Significance=Significant;P-value=0.0141;gene_ID=19122;gene_IDsrc=NCBIgene
Chr.9	Meat_and_Carcass_QTL	4885783	38584881	QTL_ID=10849;Name=Longissimus muscle area;Abbrev=LMA;PUBMED_ID=20477797;trait_ID=1090;trait=Longissimus muscle area;Coord_src=cM;FlankMarker=BM757,BM1227,BMS817;breed=Angus;VTO_name=longissimus thoracis muscle area;Map_Type=Linkage;Model=Mendelian;Test_Base=Genome-wise;Significance=Significant;P-value=0.000000380189;Bayes-value=16;Dominance_Effect=0.0002
Chr.9	Meat_and_Carcass_QTL	4885783	38584881	QTL_ID=10849;Name=Longissimus muscle area;Abbrev=LMA;PUBMED_ID=20477797;trait_ID=1090;trait=Longissimus muscle area;Coord_src=cM;FlankMarker=BM757,BM1227,BMS817;breed=Angus;VTO_name=longissimus thoracis muscle area;Map_Type=Linkage;Model=Mendelian;Test_Base=Genome-wise;Significance=Significant;P-value=0.000000380189;Bayes-value=16;Dominance_Effect=0.0002
Chr.9	Meat_and_Carcass_QTL	4885783	38584881	QTL_ID=10849;Name=Longissimus muscle area;Abbrev=LMA;PUBMED_ID=20477797;trait_ID=1090;trait=Longissimus muscle area;Coord_src=cM;FlankMarker=BM757,BM1227,BMS817;breed=Angus;VTO_name=longissimus thoracis muscle area;Map_Type=Linkage;Model=Mendelian;Test_Base=Genome-wise;Significance=Significant;P-value=0.000000380189;Bayes-value=16;Dominance_Effect=0.0002
Chr.9	Health_QTL	11580914	23852141	QTL_ID=4981;Name=Clinical mastitis;Abbrev=CM;PUBMED_ID=18832229;trait_ID=1146;trait=Clinical mastitis;Coord_src=cM;FlankMarker=ETH225,ILSTS037;breed=holstein;CMO_name=disease incidence/prevalence measurement;Map_Type=Linkage;Model=Mendelian;Test_Base=Chromosome-wise;Significance=Significant;P-value=0.001
Chr.9	Health_QTL	11580914	23852141	QTL_ID=4981;Name=Clinical mastitis;Abbrev=CM;PUBMED_ID=18832229;trait_ID=1146;trait=Clinical mastitis;Coord_src=cM;FlankMarker=ETH225,ILSTS037;breed=holstein;CMO_name=disease incidence/prevalence measurement;Map_Type=Linkage;Model=Mendelian;Test_Base=Chromosome-wise;Significance=Significant;P-value=0.001
Chr.9	Milk_QTL	11580914	70439207	QTL_ID=3747;Name=Milk fat yield;Abbrev=FY;PUBMED_ID=11167525;trait_ID=1039;trait=Milk fat yield;Coord_src=cM;FlankMarker=ETH225,TGLA73;VTO_name=milk fat amount;PTO_name=milk fat yield;CMO_name=milk fat yield;Map_Type=Linkage;Test_Base=-;Significance=-;F-Stat=4.54;Additive_Effect=-6.71
Chr.9	Milk_QTL	11580914	70439207	QTL_ID=3747;Name=Milk fat yield;Abbrev=FY;PUBMED_ID=11167525;trait_ID=1039;trait=Milk fat yield;Coord_src=cM;FlankMarker=ETH225,TGLA73;VTO_name=milk fat amount;PTO_name=milk fat yield;CMO_name=milk fat yield;Map_Type=Linkage;Test_Base=-;Significance=-;F-Stat=4.54;Additive_Effect=-6.71
Chr.9	Milk_QTL	11580914	70439207	QTL_ID=3747;Name=Milk fat yield;Abbrev=FY;PUBMED_ID=11167525;trait_ID=1039;trait=Milk fat yield;Coord_src=cM;FlankMarker=ETH225,TGLA73;VTO_name=milk fat amount;PTO_name=milk fat yield;CMO_name=milk fat yield;Map_Type=Linkage;Test_Base=-;Significance=-;F-Stat=4.54;Additive_Effect=-6.71
Chr.9	Milk_QTL	11580914	70439207	QTL_ID=3747;Name=Milk fat yield;Abbrev=FY;PUBMED_ID=11167525;trait_ID=1039;trait=Milk fat yield;Coord_src=cM;FlankMarker=ETH225,TGLA73;VTO_name=milk fat amount;PTO_name=milk fat yield;CMO_name=milk fat yield;Map_Type=Linkage;Test_Base=-;Significance=-;F-Stat=4.54;Additive_Effect=-6.71
Chr.9	Milk_QTL	11580914	70439207	QTL_ID=3747;Name=Milk fat yield;Abbrev=FY;PUBMED_ID=11167525;trait_ID=1039;trait=Milk fat yield;Coord_src=cM;FlankMarker=ETH225,TGLA73;VTO_name=milk fat amount;PTO_name=milk fat yield;CMO_name=milk fat yield;Map_Type=Linkage;Test_Base=-;Significance=-;F-Stat=4.54;Additive_Effect=-6.71
Chr.9	Reproduction_QTL	11844323	15786375	QTL_ID=11352;Name=Dystocia;Abbrev=DYST;PUBMED_ID=19912419;trait_ID=1279;trait=Dystocia;Coord_src=cM;FlankMarker=CSSM025;breed=holstein;VTO_name=parturition trait;Map_Type=Linkage;Model=Mendelian;Test_Base=Chromosome-wise;Significance=Suggestive;P-value=0.086
Chr.9	Reproduction_QTL	11844323	15786375	QTL_ID=11352;Name=Dystocia;Abbrev=DYST;PUBMED_ID=19912419;trait_ID=1279;trait=Dystocia;Coord_src=cM;FlankMarker=CSSM025;breed=holstein;VTO_name=parturition trait;Map_Type=Linkage;Model=Mendelian;Test_Base=Chromosome-wise;Significance=Suggestive;P-value=0.086
Chr.9	Meat_and_Carcass_QTL	15495717	15677378	QTL_ID=4534;Name=Marbling score;Abbrev=MARBL;PUBMED_ID=17347893;trait_ID=1027;trait=Marbling score;Coord_src=cM;VTO_name=intramuscular adipose amount;PTO_name=intramuscular fat content;Map_Type=Linkage;Test_Base=Chromosome-wise;P-value=<0.001;F-Stat=38.1
Chr.9	Meat_and_Carcass_QTL	15495717	15677378	QTL_ID=4534;Name=Marbling score;Abbrev=MARBL;PUBMED_ID=17347893;trait_ID=1027;trait=Marbling score;Coord_src=cM;VTO_name=intramuscular adipose amount;PTO_name=intramuscular fat content;Map_Type=Linkage;Test_Base=Chromosome-wise;P-value=<0.001;F-Stat=38.1
Chr.9	Milk_QTL	19801092	94009774	QTL_ID=21540;Name=Milk alpha-casein percentage;Abbrev=MACASP;PUBMED_ID=19397519;trait_ID=1386;trait=Milk alpha-casein percentage;Coord_src=cM;breed=holstein;VTO_name=milk alpha-casein amount;PTO_name=milk alpha-casein content;CMO_name=milk alpha-casein percentage;Map_Type=Linkage;Model=-;Test_Base=Genome-wise;Significance=Suggestive;P-value=0.027;F-Stat=4.4
Chr.9	Milk_QTL	19801092	94009774	QTL_ID=21540;Name=Milk alpha-casein percentage;Abbrev=MACASP;PUBMED_ID=19397519;trait_ID=1386;trait=Milk alpha-casein percentage;Coord_src=cM;breed=holstein;VTO_name=milk alpha-casein amount;PTO_name=milk alpha-casein content;CMO_name=milk alpha-casein percentage;Map_Type=Linkage;Model=-;Test_Base=Genome-wise;Significance=Suggestive;P-value=0.027;F-Stat=4.4
Chr.9	Milk_QTL	19801092	94009774	QTL_ID=21540;Name=Milk alpha-casein percentage;Abbrev=MACASP;PUBMED_ID=19397519;trait_ID=1386;trait=Milk alpha-casein percentage;Coord_src=cM;breed=holstein;VTO_name=milk alpha-casein amount;PTO_name=milk alpha-casein content;CMO_name=milk alpha-casein percentage;Map_Type=Linkage;Model=-;Test_Base=Genome-wise;Significance=Suggestive;P-value=0.027;F-Stat=4.4
Chr.9	Meat_and_Carcass_QTL	21917447	45097442	QTL_ID=4507;Name=Marbling score;Abbrev=MARBL;PUBMED_ID=17453646;trait_ID=1027;trait=Marbling score;Coord_src=cM;FlankMarker=BM1227,DIK2741;VTO_name=intramuscular adipose amount;PTO_name=intramuscular fat content;Map_Type=Linkage;Test_Base=Chromosome-wise;Significance=Significant;P-value=<0.01
Chr.9	Production_QTL	21917447	38584881	QTL_ID=10852;Name=Body weight (weaning);Abbrev=WWT;PUBMED_ID=20477797;trait_ID=1063;trait=Body weight (weaning);Coord_src=cM;FlankMarker=BM1227,BM1227,BMS817;breed=Angus;VTO_name=body mass;CMO_name=body weight;Map_Type=Linkage;Model=Mendelian;Test_Base=Genome-wise;Significance=Significant;P-value=0.001819700859;Dominance_Effect=0.0007
Chr.9	Milk_QTL	24615119	39792929	QTL_ID=3737;Name=Milk yield;Abbrev=MY;PUBMED_ID=11167525;trait_ID=1044;trait=Milk yield;Coord_src=cM;FlankMarker=BMS555;VTO_name=milk amount;CMO_name=milk yield;Map_Type=Linkage;Test_Base=-;Significance=-;F-Stat=1.69;Additive_Effect=-168.18
Chr.9	Milk_QTL	24615119	45406266	QTL_ID=3738;Name=Milk yield;Abbrev=MY;PUBMED_ID=11167525;trait_ID=1044;trait=Milk yield;Coord_src=cM;FlankMarker=UWCA9;VTO_name=milk amount;CMO_name=milk yield;Map_Type=Linkage;Test_Base=-;Significance=-;F-Stat=6.91;Additive_Effect=177.98
Chr.9	Milk_QTL	24615119	45406266	QTL_ID=3738;Name=Milk yield;Abbrev=MY;PUBMED_ID=11167525;trait_ID=1044;trait=Milk yield;Coord_src=cM;FlankMarker=UWCA9;VTO_name=milk amount;CMO_name=milk yield;Map_Type=Linkage;Test_Base=-;Significance=-;F-Stat=6.91;Additive_Effect=177.98
Chr.9	Exterior_QTL	28084852	45406266	QTL_ID=7135;Name=Social separation--Vocalization;Abbrev=SSVO;PUBMED_ID=18784067;trait_ID=1236;trait=Social separation--Vocalization;Coord_src=cM;FlankMarker=BM2504,UWCA9;breed=charolais,holstein;VTO_name=conspecific interaction trait;Map_Type=Linkage;Model=Mendelian;Test_Base=Chromosome-wise;Significance=Significant;P-value=0.0299;F-Stat=5.1;Variance=4.34;Dominance_Effect=-0.24;Additive_Effect=-0…
Chr.9	Exterior_QTL	28084852	45406266	QTL_ID=7135;Name=Social separation--Vocalization;Abbrev=SSVO;PUBMED_ID=18784067;trait_ID=1236;trait=Social separation--Vocalization;Coord_src=cM;FlankMarker=BM2504,UWCA9;breed=charolais,holstein;VTO_name=conspecific interaction trait;Map_Type=Linkage;Model=Mendelian;Test_Base=Chromosome-wise;Significance=Significant;P-value=0.0299;F-Stat=5.1;Variance=4.34;Dominance_Effect=-0.24;Additive_Effect=-0…
Chr.9	Reproduction_QTL	28084852	35187813	QTL_ID=4659;Name=Calf size;Abbrev=CALFSZ;PUBMED_ID=18420641;trait_ID=1168;trait=Calf size;Coord_src=cM;FlankMarker=BM2504,BMS1267;CMO_name=size of newly born offspring;Map_Type=Linkage;Model=Mendelian;Test_Base=Chromosome-wise;Significance=-;P-value=0.027
Chr.9	Exterior_QTL	30728025	74499340	QTL_ID=10292;Name=Udder cleft;Abbrev=UC;PUBMED_ID=15377635;trait_ID=1130;trait=Udder cleft;Coord_src=cM;FlankMarker=CSSM056;breed=holstein;VTO_name=udder cleft morphology trait;Map_Type=Linkage;Model=n/a;Significance=Significant;P-value=0.002
Chr.9	Exterior_QTL	30728025	74499340	QTL_ID=10292;Name=Udder cleft;Abbrev=UC;PUBMED_ID=15377635;trait_ID=1130;trait=Udder cleft;Coord_src=cM;FlankMarker=CSSM056;breed=holstein;VTO_name=udder cleft morphology trait;Map_Type=Linkage;Model=n/a;Significance=Significant;P-value=0.002
Chr.9	Exterior_QTL	30728025	74499340	QTL_ID=10292;Name=Udder cleft;Abbrev=UC;PUBMED_ID=15377635;trait_ID=1130;trait=Udder cleft;Coord_src=cM;FlankMarker=CSSM056;breed=holstein;VTO_name=udder cleft morphology trait;Map_Type=Linkage;Model=n/a;Significance=Significant;P-value=0.002
Chr.9	Exterior_QTL	36332280	50865192	QTL_ID=3441;Name=Udder balance;Abbrev=UBAL;PUBMED_ID=12605852;trait_ID=1751;trait=Udder balance;Coord_src=cM;FlankMarker=UWCA9;Map_Type=Linkage;Test_Base=-;Significance=-;P-value=0.006
Chr.9	Milk_QTL	38584881	45406266	QTL_ID=1687;Name=Milk fat yield;Abbrev=FY;PUBMED_ID=16167984;trait_ID=1039;trait=Milk fat yield;Coord_src=cM;FlankMarker=BMS817,UWCA9;VTO_name=milk fat amount;PTO_name=milk fat yield;CMO_name=milk fat yield;Map_Type=Linkage;Significance=Significant;F-Stat=15.60;Additive_Effect=11.41
Chr.9	Reproduction_QTL	38584881	51846163	QTL_ID=10854;Name=Scrotal circumference;Abbrev=SCRCIR;PUBMED_ID=20477797;trait_ID=1270;trait=Scrotal circumference;Coord_src=cM;FlankMarker=BMS817,BMS817,BMS434;breed=Angus;VTO_name=scrotum circumference;Map_Type=Linkage;Model=Mendelian;Test_Base=Chromosome-wise;Significance=Significant;P-value=0.000549540874;Bayes-value=12;Dominance_Effect=0.0465
Chr.9	Health_QTL	39792929	74081518	QTL_ID=10085;Name=Clinical mastitis;Abbrev=CM;PUBMED_ID=18462482;trait_ID=1146;trait=Clinical mastitis;Coord_src=cM;FlankMarker=BM7209;breed=ayrshire,Swedish Red-and-White;CMO_name=disease incidence/prevalence measurement;Map_Type=Linkage;Model=Mendelian;Significance=Significant;P-value=<0.01;Likelihood_Ratio=15.3
Chr.9	Health_QTL	39792929	74081518	QTL_ID=10085;Name=Clinical mastitis;Abbrev=CM;PUBMED_ID=18462482;trait_ID=1146;trait=Clinical mastitis;Coord_src=cM;FlankMarker=BM7209;breed=ayrshire,Swedish Red-and-White;CMO_name=disease incidence/prevalence measurement;Map_Type=Linkage;Model=Mendelian;Significance=Significant;P-value=<0.01;Likelihood_Ratio=15.3
Chr.9	Milk_QTL	39792929	45406266	QTL_ID=3754;Name=Milk protein yield;Abbrev=PY;PUBMED_ID=11167525;trait_ID=1042;trait=Milk protein yield;Coord_src=cM;FlankMarker=UWCA9;VTO_name=milk protein amount;PTO_name=milk protein yield;CMO_name=milk protein yield;Map_Type=Linkage;Test_Base=-;Significance=-;F-Stat=7.47;Additive_Effect=5.95
Chr.9	Milk_QTL	39792929	45406266	QTL_ID=3754;Name=Milk protein yield;Abbrev=PY;PUBMED_ID=11167525;trait_ID=1042;trait=Milk protein yield;Coord_src=cM;FlankMarker=UWCA9;VTO_name=milk protein amount;PTO_name=milk protein yield;CMO_name=milk protein yield;Map_Type=Linkage;Test_Base=-;Significance=-;F-Stat=7.47;Additive_Effect=5.95
Chr.9	Milk_QTL	39792929	70439207	QTL_ID=3745;Name=Milk fat yield;Abbrev=FY;PUBMED_ID=11167525;trait_ID=1039;trait=Milk fat yield;Coord_src=cM;FlankMarker=BMS555;VTO_name=milk fat amount;PTO_name=milk fat yield;CMO_name=milk fat yield;Map_Type=Linkage;Test_Base=-;Significance=-;F-Stat=0.74;Additive_Effect=-3.12
Chr.9	Milk_QTL	39792929	70439207	QTL_ID=3745;Name=Milk fat yield;Abbrev=FY;PUBMED_ID=11167525;trait_ID=1039;trait=Milk fat yield;Coord_src=cM;FlankMarker=BMS555;VTO_name=milk fat amount;PTO_name=milk fat yield;CMO_name=milk fat yield;Map_Type=Linkage;Test_Base=-;Significance=-;F-Stat=0.74;Additive_Effect=-3.12
Chr.9	Health_QTL	41536879	82637770	QTL_ID=10076;Name=Clinical mastitis;Abbrev=CM;PUBMED_ID=18462482;trait_ID=1146;trait=Clinical mastitis;Coord_src=cM;FlankMarker=INRA084;breed=ayrshire,Swedish Red-and-White;CMO_name=disease incidence/prevalence measurement;Map_Type=Linkage;Model=Mendelian;Significance=Significant;P-value=<0.05;Likelihood_Ratio=13.4
Chr.9	Health_QTL	41536879	82637770	QTL_ID=10076;Name=Clinical mastitis;Abbrev=CM;PUBMED_ID=18462482;trait_ID=1146;trait=Clinical mastitis;Coord_src=cM;FlankMarker=INRA084;breed=ayrshire,Swedish Red-and-White;CMO_name=disease incidence/prevalence measurement;Map_Type=Linkage;Model=Mendelian;Significance=Significant;P-value=<0.05;Likelihood_Ratio=13.4
Chr.9	Meat_and_Carcass_QTL	41782122	69031332	QTL_ID=4906;Name=Marbling score;Abbrev=MARBL;PUBMED_ID=14677852;trait_ID=1027;trait=Marbling score;Coord_src=cM;VTO_name=intramuscular adipose amount;PTO_name=intramuscular fat content;Map_Type=Linkage;Model=Mendelian;Test_Base=Genome-wise;Significance=Suggestive;F-Stat=14;Additive_Effect=-21.7
Chr.9	Meat_and_Carcass_QTL	41782122	69031332	QTL_ID=4906;Name=Marbling score;Abbrev=MARBL;PUBMED_ID=14677852;trait_ID=1027;trait=Marbling score;Coord_src=cM;VTO_name=intramuscular adipose amount;PTO_name=intramuscular fat content;Map_Type=Linkage;Model=Mendelian;Test_Base=Genome-wise;Significance=Suggestive;F-Stat=14;Additive_Effect=-21.7
Chr.9	Milk_QTL	44261800	56623858	QTL_ID=2558;Name=Milk protein percentage;Abbrev=PP;PUBMED_ID=11417712;trait_ID=1041;trait=Milk protein percentage;Coord_src=cM;FlankMarker=ILSTS013,BMC701;VTO_name=milk protein amount;PTO_name=milk protein content;CMO_name=milk protein percentage;Map_Type=Linkage;Significance=Significant;P-value=0.063
Chr.9	Production_QTL	44261800	72900719	QTL_ID=4483;Name=Average daily gain;Abbrev=ADG;PUBMED_ID=17596127;trait_ID=1053;trait=Average daily gain;Coord_src=cM;FlankMarker=ILSTS013,BMS1724;VTO_name=postnatal growth trait;CMO_name=average daily body weight gain;Map_Type=Linkage;Test_Base=Genome-wise;Significance=-;P-value=0.002;F-Stat=16.3;Additive_Effect=0.076
Chr.9	Production_QTL	44261800	72900719	QTL_ID=4483;Name=Average daily gain;Abbrev=ADG;PUBMED_ID=17596127;trait_ID=1053;trait=Average daily gain;Coord_src=cM;FlankMarker=ILSTS013,BMS1724;VTO_name=postnatal growth trait;CMO_name=average daily body weight gain;Map_Type=Linkage;Test_Base=Genome-wise;Significance=-;P-value=0.002;F-Stat=16.3;Additive_Effect=0.076
Chr.9	Milk_QTL	45097442	70439207	QTL_ID=10217;Name=Milk fat yield;Abbrev=FY;PUBMED_ID=7713441;trait_ID=1039;trait=Milk fat yield;Coord_src=cM;FlankMarker=TGLA261,TGLA73;breed=holstein;VTO_name=milk fat amount;PTO_name=milk fat yield;CMO_name=milk fat yield;Map_Type=Linkage;Model=Mendelian;Test_Base=Genome-wise;Significance=Significant;LOD-score=>3.0
Chr.9	Milk_QTL	45097442	70439207	QTL_ID=10217;Name=Milk fat yield;Abbrev=FY;PUBMED_ID=7713441;trait_ID=1039;trait=Milk fat yield;Coord_src=cM;FlankMarker=TGLA261,TGLA73;breed=holstein;VTO_name=milk fat amount;PTO_name=milk fat yield;CMO_name=milk fat yield;Map_Type=Linkage;Model=Mendelian;Test_Base=Genome-wise;Significance=Significant;LOD-score=>3.0
Chr.9	Health_QTL	45406266	70439207	QTL_ID=1745;Name=General disease susceptibility;Abbrev=GDR;PUBMED_ID=15328290;trait_ID=1147;trait=General disease susceptibility;Coord_src=cM;FlankMarker=UWCA9,TGLA73;CMO_name=disease process measurement;Map_Type=Linkage;Significance=Significant;P-value=<0.01
Chr.9	Health_QTL	45406266	76524864	QTL_ID=66185;Name=FMDV peptide-induced cell proliferation;Abbrev=FMDVCP;PUBMED_ID=21138580;trait_ID=1611;trait=FMDV peptide-induced cell proliferation;Coord_src=cM;FlankMarker=UWCA9,MM12E6;breed=charolais,holstein;CMO_name=mitogen-stimulated white blood cell radioactive nucleoside incorporation;Map_Type=Linkage;Model=Mendelian;Test_Base=Chromosome-wise;Significance=Significant;P-value=<0.05;F-Sta…
Chr.9	Milk_QTL	45411716	70439207	QTL_ID=1522;Name=Milk protein yield;Abbrev=PY;PUBMED_ID=16533362;trait_ID=1042;trait=Milk protein yield;Coord_src=cM;FlankMarker=UCWA9,BM6436;VTO_name=milk protein amount;PTO_name=milk protein yield;CMO_name=milk protein yield;Map_Type=Linkage;Significance=Significant;P-value=0.02;gene_ID=19122;gene_IDsrc=NCBIgene
Chr.9	Meat_and_Carcass_QTL	46250992	90058639	QTL_ID=12155;Name=Liver weight;Abbrev=LIVWT;PUBMED_ID=20477785;trait_ID=1345;trait=Liver weight;Coord_src=cM;FlankMarker=BMS1148;breed=jersey,limousin;VTO_name=liver mass;CMO_name=liver weight;Map_Type=Linkage;Model=Mendelian;Test_Base=Genome-wise;Significance=Significant;P-value=<0.05
Chr.9	Meat_and_Carcass_QTL	51846163	72900719	QTL_ID=10857;Name=Longissimus muscle area;Abbrev=LMA;PUBMED_ID=20477797;trait_ID=1090;trait=Longissimus muscle area;Coord_src=cM;FlankMarker=BMS434,BMC701,BMS1724;breed=Angus;VTO_name=longissimus thoracis muscle area;Map_Type=Linkage;Model=Mendelian;Test_Base=Genome-wise;Significance=Significant;P-value=0.000288403150;Dominance_Effect=0.031
Chr.9	Milk_QTL	56623858	70439207	QTL_ID=2553;Name=Milk yield;Abbrev=MY;PUBMED_ID=11417712;trait_ID=1044;trait=Milk yield;Coord_src=cM;FlankMarker=BMC701,BM6436;VTO_name=milk amount;CMO_name=milk yield;Map_Type=Linkage;Significance=Significant;P-value=0.027
Chr.9	Reproduction_QTL	56623858	64898535	QTL_ID=10858;Name=Scrotal circumference;Abbrev=SCRCIR;PUBMED_ID=20477797;trait_ID=1270;trait=Scrotal circumference;Coord_src=cM;FlankMarker=BMC701,BMS2377,BMS2377;breed=Angus;VTO_name=scrotum circumference;Map_Type=Linkage;Model=Mendelian;Test_Base=Chromosome-wise;Significance=Significant;P-value=0.000549540874;Dominance_Effect=0.0063
Chr.9	Meat_and_Carcass_QTL	57223341	83564244	QTL_ID=4907;Name=Retail product yield;Abbrev=YIELD;PUBMED_ID=14677852;trait_ID=1062;trait=Retail product yield;Coord_src=cM;PTO_name=retail product yield;Map_Type=Linkage;Model=Mendelian;Test_Base=Genome-wise;Significance=Significant;F-Stat=20.5;Additive_Effect=-1.46
Chr.10	Milk_QTL	0	103308717	QTL_ID=10102;Name=Milk protein yield;Abbrev=PY;PUBMED_ID=18298934;trait_ID=1042;trait=Milk protein yield;Coord_src=cM;FlankMarker=DIK5169,DIK2016;breed=holstein;VTO_name=milk protein amount;PTO_name=milk protein yield;CMO_name=milk protein yield;Map_Type=Linkage;Model=n/a;Test_Base=Comparison-wise;Significance=Significant;P-value=<0.05;Likelihood_Ratio=8.6
Chr.10	Milk_QTL	0	103308717	QTL_ID=10102;Name=Milk protein yield;Abbrev=PY;PUBMED_ID=18298934;trait_ID=1042;trait=Milk protein yield;Coord_src=cM;FlankMarker=DIK5169,DIK2016;breed=holstein;VTO_name=milk protein amount;PTO_name=milk protein yield;CMO_name=milk protein yield;Map_Type=Linkage;Model=n/a;Test_Base=Comparison-wise;Significance=Significant;P-value=<0.05;Likelihood_Ratio=8.6
Chr.10	Milk_QTL	0	103308717	QTL_ID=10102;Name=Milk protein yield;Abbrev=PY;PUBMED_ID=18298934;trait_ID=1042;trait=Milk protein yield;Coord_src=cM;FlankMarker=DIK5169,DIK2016;breed=holstein;VTO_name=milk protein amount;PTO_name=milk protein yield;CMO_name=milk protein yield;Map_Type=Linkage;Model=n/a;Test_Base=Comparison-wise;Significance=Significant;P-value=<0.05;Likelihood_Ratio=8.6
Chr.10	Milk_QTL	0	103308717	QTL_ID=10102;Name=Milk protein yield;Abbrev=PY;PUBMED_ID=18298934;trait_ID=1042;trait=Milk protein yield;Coord_src=cM;FlankMarker=DIK5169,DIK2016;breed=holstein;VTO_name=milk protein amount;PTO_name=milk protein yield;CMO_name=milk protein yield;Map_Type=Linkage;Model=n/a;Test_Base=Comparison-wise;Significance=Significant;P-value=<0.05;Likelihood_Ratio=8.6
Chr.10	Milk_QTL	0	103308717	QTL_ID=10102;Name=Milk protein yield;Abbrev=PY;PUBMED_ID=18298934;trait_ID=1042;trait=Milk protein yield;Coord_src=cM;FlankMarker=DIK5169,DIK2016;breed=holstein;VTO_name=milk protein amount;PTO_name=milk protein yield;CMO_name=milk protein yield;Map_Type=Linkage;Model=n/a;Test_Base=Comparison-wise;Significance=Significant;P-value=<0.05;Likelihood_Ratio=8.6
Chr.10	Milk_QTL	0	103308717	QTL_ID=10102;Name=Milk protein yield;Abbrev=PY;PUBMED_ID=18298934;trait_ID=1042;trait=Milk protein yield;Coord_src=cM;FlankMarker=DIK5169,DIK2016;breed=holstein;VTO_name=milk protein amount;PTO_name=milk protein yield;CMO_name=milk protein yield;Map_Type=Linkage;Model=n/a;Test_Base=Comparison-wise;Significance=Significant;P-value=<0.05;Likelihood_Ratio=8.6
Chr.10	Milk_QTL	0	103308717	QTL_ID=10102;Name=Milk protein yield;Abbrev=PY;PUBMED_ID=18298934;trait_ID=1042;trait=Milk protein yield;Coord_src=cM;FlankMarker=DIK5169,DIK2016;breed=holstein;VTO_name=milk protein amount;PTO_name=milk protein yield;CMO_name=milk protein yield;Map_Type=Linkage;Model=n/a;Test_Base=Comparison-wise;Significance=Significant;P-value=<0.05;Likelihood_Ratio=8.6
Chr.10	Milk_QTL	0	103308717	QTL_ID=10102;Name=Milk protein yield;Abbrev=PY;PUBMED_ID=18298934;trait_ID=1042;trait=Milk protein yield;Coord_src=cM;FlankMarker=DIK5169,DIK2016;breed=holstein;VTO_name=milk protein amount;PTO_name=milk protein yield;CMO_name=milk protein yield;Map_Type=Linkage;Model=n/a;Test_Base=Comparison-wise;Significance=Significant;P-value=<0.05;Likelihood_Ratio=8.6
Chr.10	Milk_QTL	0	103308717	QTL_ID=10102;Name=Milk protein yield;Abbrev=PY;PUBMED_ID=18298934;trait_ID=1042;trait=Milk protein yield;Coord_src=cM;FlankMarker=DIK5169,DIK2016;breed=holstein;VTO_name=milk protein amount;PTO_name=milk protein yield;CMO_name=milk protein yield;Map_Type=Linkage;Model=n/a;Test_Base=Comparison-wise;Significance=Significant;P-value=<0.05;Likelihood_Ratio=8.6
Chr.10	Milk_QTL	0	103308717	QTL_ID=10102;Name=Milk protein yield;Abbrev=PY;PUBMED_ID=18298934;trait_ID=1042;trait=Milk protein yield;Coord_src=cM;FlankMarker=DIK5169,DIK2016;breed=holstein;VTO_name=milk protein amount;PTO_name=milk protein yield;CMO_name=milk protein yield;Map_Type=Linkage;Model=n/a;Test_Base=Comparison-wise;Significance=Significant;P-value=<0.05;Likelihood_Ratio=8.6
Chr.10	Milk_QTL	0	103308717	QTL_ID=10102;Name=Milk protein yield;Abbrev=PY;PUBMED_ID=18298934;trait_ID=1042;trait=Milk protein yield;Coord_src=cM;FlankMarker=DIK5169,DIK2016;breed=holstein;VTO_name=milk protein amount;PTO_name=milk protein yield;CMO_name=milk protein yield;Map_Type=Linkage;Model=n/a;Test_Base=Comparison-wise;Significance=Significant;P-value=<0.05;Likelihood_Ratio=8.6
Chr.10	Milk_QTL	0	103308717	QTL_ID=10102;Name=Milk protein yield;Abbrev=PY;PUBMED_ID=18298934;trait_ID=1042;trait=Milk protein yield;Coord_src=cM;FlankMarker=DIK5169,DIK2016;breed=holstein;VTO_name=milk protein amount;PTO_name=milk protein yield;CMO_name=milk protein yield;Map_Type=Linkage;Model=n/a;Test_Base=Comparison-wise;Significance=Significant;P-value=<0.05;Likelihood_Ratio=8.6
Chr.10	Milk_QTL	0	103308717	QTL_ID=10102;Name=Milk protein yield;Abbrev=PY;PUBMED_ID=18298934;trait_ID=1042;trait=Milk protein yield;Coord_src=cM;FlankMarker=DIK5169,DIK2016;breed=holstein;VTO_name=milk protein amount;PTO_name=milk protein yield;CMO_name=milk protein yield;Map_Type=Linkage;Model=n/a;Test_Base=Comparison-wise;Significance=Significant;P-value=<0.05;Likelihood_Ratio=8.6
Chr.10	Milk_QTL	0	103308717	QTL_ID=10102;Name=Milk protein yield;Abbrev=PY;PUBMED_ID=18298934;trait_ID=1042;trait=Milk protein yield;Coord_src=cM;FlankMarker=DIK5169,DIK2016;breed=holstein;VTO_name=milk protein amount;PTO_name=milk protein yield;CMO_name=milk protein yield;Map_Type=Linkage;Model=n/a;Test_Base=Comparison-wise;Significance=Significant;P-value=<0.05;Likelihood_Ratio=8.6
Chr.10	Milk_QTL	0	103308717	QTL_ID=10102;Name=Milk protein yield;Abbrev=PY;PUBMED_ID=18298934;trait_ID=1042;trait=Milk protein yield;Coord_src=cM;FlankMarker=DIK5169,DIK2016;breed=holstein;VTO_name=milk protein amount;PTO_name=milk protein yield;CMO_name=milk protein yield;Map_Type=Linkage;Model=n/a;Test_Base=Comparison-wise;Significance=Significant;P-value=<0.05;Likelihood_Ratio=8.6
Chr.10	Milk_QTL	0	103308717	QTL_ID=10102;Name=Milk protein yield;Abbrev=PY;PUBMED_ID=18298934;trait_ID=1042;trait=Milk protein yield;Coord_src=cM;FlankMarker=DIK5169,DIK2016;breed=holstein;VTO_name=milk protein amount;PTO_name=milk protein yield;CMO_name=milk protein yield;Map_Type=Linkage;Model=n/a;Test_Base=Comparison-wise;Significance=Significant;P-value=<0.05;Likelihood_Ratio=8.6
Chr.10	Milk_QTL	17939889	48497703	QTL_ID=10219;Name=Milk fat yield;Abbrev=FY;PUBMED_ID=7713441;trait_ID=1039;trait=Milk fat yield;Coord_src=cM;FlankMarker=TGLA131;breed=holstein;VTO_name=milk fat amount;PTO_name=milk fat yield;CMO_name=milk fat yield;Map_Type=Linkage;Model=Mendelian;Test_Base=Genome-wise;Significance=Significant;LOD-score=>3.0
Chr.10	Milk_QTL	17939889	48497703	QTL_ID=10219;Name=Milk fat yield;Abbrev=FY;PUBMED_ID=7713441;trait_ID=1039;trait=Milk fat yield;Coord_src=cM;FlankMarker=TGLA131;breed=holstein;VTO_name=milk fat amount;PTO_name=milk fat yield;CMO_name=milk fat yield;Map_Type=Linkage;Model=Mendelian;Test_Base=Genome-wise;Significance=Significant;LOD-score=>3.0
Chr.10	Meat_and_Carcass_QTL	20879144	52158727	QTL_ID=4824;Name=Muscle pH;Abbrev=PH;PUBMED_ID=18254735;trait_ID=1181;trait=Muscle pH;Coord_src=cM;FlankMarker=BMS528,BM888;VTO_name=muscle pH;PTO_name=meat pH;Map_Type=Linkage;Model=Mendelian;Test_Base=Chromosome-wise;Significance=Significant;P-value=0.0324;F-Stat=5.73;Dominance_Effect=0.03;Additive_Effect=-0.02
Chr.10	Meat_and_Carcass_QTL	20879144	52158727	QTL_ID=4824;Name=Muscle pH;Abbrev=PH;PUBMED_ID=18254735;trait_ID=1181;trait=Muscle pH;Coord_src=cM;FlankMarker=BMS528,BM888;VTO_name=muscle pH;PTO_name=meat pH;Map_Type=Linkage;Model=Mendelian;Test_Base=Chromosome-wise;Significance=Significant;P-value=0.0324;F-Stat=5.73;Dominance_Effect=0.03;Additive_Effect=-0.02
Chr.10	Meat_and_Carcass_QTL	20879144	52158727	QTL_ID=4824;Name=Muscle pH;Abbrev=PH;PUBMED_ID=18254735;trait_ID=1181;trait=Muscle pH;Coord_src=cM;FlankMarker=BMS528,BM888;VTO_name=muscle pH;PTO_name=meat pH;Map_Type=Linkage;Model=Mendelian;Test_Base=Chromosome-wise;Significance=Significant;P-value=0.0324;F-Stat=5.73;Dominance_Effect=0.03;Additive_Effect=-0.02
Chr.10	Reproduction_QTL	20879144	51750015	QTL_ID=10871;Name=Calving ease;Abbrev=CALEASE;PUBMED_ID=20477797;trait_ID=1073;trait=Calving ease;Coord_src=cM;FlankMarker=BMS528,BMS2742,BMS419;breed=Angus;VTO_name=parturition trait;Map_Type=Linkage;Model=Mendelian;Test_Base=Chromosome-wise;Significance=Significant;P-value=0.003981071706;Bayes-value=1;Dominance_Effect=0.0221
Chr.10	Reproduction_QTL	20879144	51750015	QTL_ID=10871;Name=Calving ease;Abbrev=CALEASE;PUBMED_ID=20477797;trait_ID=1073;trait=Calving ease;Coord_src=cM;FlankMarker=BMS528,BMS2742,BMS419;breed=Angus;VTO_name=parturition trait;Map_Type=Linkage;Model=Mendelian;Test_Base=Chromosome-wise;Significance=Significant;P-value=0.003981071706;Bayes-value=1;Dominance_Effect=0.0221
Chr.10	Reproduction_QTL	20879144	51750015	QTL_ID=10871;Name=Calving ease;Abbrev=CALEASE;PUBMED_ID=20477797;trait_ID=1073;trait=Calving ease;Coord_src=cM;FlankMarker=BMS528,BMS2742,BMS419;breed=Angus;VTO_name=parturition trait;Map_Type=Linkage;Model=Mendelian;Test_Base=Chromosome-wise;Significance=Significant;P-value=0.003981071706;Bayes-value=1;Dominance_Effect=0.0221
Chr.10	Exterior_QTL	21479169	110613374	QTL_ID=10294;Name=Udder attachment;Abbrev=UA;PUBMED_ID=15377635;trait_ID=1133;trait=Udder attachment;Coord_src=cM;FlankMarker=BM1237;breed=holstein;VTO_name=udder morphology trait;Map_Type=Linkage;Model=n/a;Significance=Significant;P-value=0.004
Chr.10	Exterior_QTL	21479169	110613374	QTL_ID=10294;Name=Udder attachment;Abbrev=UA;PUBMED_ID=15377635;trait_ID=1133;trait=Udder attachment;Coord_src=cM;FlankMarker=BM1237;breed=holstein;VTO_name=udder morphology trait;Map_Type=Linkage;Model=n/a;Significance=Significant;P-value=0.004
Chr.10	Exterior_QTL	21479169	110613374	QTL_ID=10294;Name=Udder attachment;Abbrev=UA;PUBMED_ID=15377635;trait_ID=1133;trait=Udder attachment;Coord_src=cM;FlankMarker=BM1237;breed=holstein;VTO_name=udder morphology trait;Map_Type=Linkage;Model=n/a;Significance=Significant;P-value=0.004
Chr.10	Exterior_QTL	21479169	110613374	QTL_ID=10294;Name=Udder attachment;Abbrev=UA;PUBMED_ID=15377635;trait_ID=1133;trait=Udder attachment;Coord_src=cM;FlankMarker=BM1237;breed=holstein;VTO_name=udder morphology trait;Map_Type=Linkage;Model=n/a;Significance=Significant;P-value=0.004
Chr.10	Exterior_QTL	21479169	110613374	QTL_ID=10294;Name=Udder attachment;Abbrev=UA;PUBMED_ID=15377635;trait_ID=1133;trait=Udder attachment;Coord_src=cM;FlankMarker=BM1237;breed=holstein;VTO_name=udder morphology trait;Map_Type=Linkage;Model=n/a;Significance=Significant;P-value=0.004
Chr.10	Exterior_QTL	21479169	110613374	QTL_ID=10294;Name=Udder attachment;Abbrev=UA;PUBMED_ID=15377635;trait_ID=1133;trait=Udder attachment;Coord_src=cM;FlankMarker=BM1237;breed=holstein;VTO_name=udder morphology trait;Map_Type=Linkage;Model=n/a;Significance=Significant;P-value=0.004
Chr.10	Exterior_QTL	21479169	110613374	QTL_ID=10294;Name=Udder attachment;Abbrev=UA;PUBMED_ID=15377635;trait_ID=1133;trait=Udder attachment;Coord_src=cM;FlankMarker=BM1237;breed=holstein;VTO_name=udder morphology trait;Map_Type=Linkage;Model=n/a;Significance=Significant;P-value=0.004
Chr.10	Exterior_QTL	21479169	110613374	QTL_ID=10294;Name=Udder attachment;Abbrev=UA;PUBMED_ID=15377635;trait_ID=1133;trait=Udder attachment;Coord_src=cM;FlankMarker=BM1237;breed=holstein;VTO_name=udder morphology trait;Map_Type=Linkage;Model=n/a;Significance=Significant;P-value=0.004
Chr.10	Exterior_QTL	21479169	110613374	QTL_ID=10294;Name=Udder attachment;Abbrev=UA;PUBMED_ID=15377635;trait_ID=1133;trait=Udder attachment;Coord_src=cM;FlankMarker=BM1237;breed=holstein;VTO_name=udder morphology trait;Map_Type=Linkage;Model=n/a;Significance=Significant;P-value=0.004
Chr.10	Exterior_QTL	21479169	110613374	QTL_ID=10294;Name=Udder attachment;Abbrev=UA;PUBMED_ID=15377635;trait_ID=1133;trait=Udder attachment;Coord_src=cM;FlankMarker=BM1237;breed=holstein;VTO_name=udder morphology trait;Map_Type=Linkage;Model=n/a;Significance=Significant;P-value=0.004
Chr.10	Exterior_QTL	21479169	110613374	QTL_ID=10294;Name=Udder attachment;Abbrev=UA;PUBMED_ID=15377635;trait_ID=1133;trait=Udder attachment;Coord_src=cM;FlankMarker=BM1237;breed=holstein;VTO_name=udder morphology trait;Map_Type=Linkage;Model=n/a;Significance=Significant;P-value=0.004
Chr.10	Exterior_QTL	21479169	110613374	QTL_ID=10294;Name=Udder attachment;Abbrev=UA;PUBMED_ID=15377635;trait_ID=1133;trait=Udder attachment;Coord_src=cM;FlankMarker=BM1237;breed=holstein;VTO_name=udder morphology trait;Map_Type=Linkage;Model=n/a;Significance=Significant;P-value=0.004
Chr.10	Exterior_QTL	21479169	110613374	QTL_ID=10294;Name=Udder attachment;Abbrev=UA;PUBMED_ID=15377635;trait_ID=1133;trait=Udder attachment;Coord_src=cM;FlankMarker=BM1237;breed=holstein;VTO_name=udder morphology trait;Map_Type=Linkage;Model=n/a;Significance=Significant;P-value=0.004
Chr.10	Exterior_QTL	21479169	110613374	QTL_ID=10294;Name=Udder attachment;Abbrev=UA;PUBMED_ID=15377635;trait_ID=1133;trait=Udder attachment;Coord_src=cM;FlankMarker=BM1237;breed=holstein;VTO_name=udder morphology trait;Map_Type=Linkage;Model=n/a;Significance=Significant;P-value=0.004
Chr.10	Exterior_QTL	21479169	110613374	QTL_ID=10294;Name=Udder attachment;Abbrev=UA;PUBMED_ID=15377635;trait_ID=1133;trait=Udder attachment;Coord_src=cM;FlankMarker=BM1237;breed=holstein;VTO_name=udder morphology trait;Map_Type=Linkage;Model=n/a;Significance=Significant;P-value=0.004
Chr.10	Exterior_QTL	21479169	110613374	QTL_ID=10294;Name=Udder attachment;Abbrev=UA;PUBMED_ID=15377635;trait_ID=1133;trait=Udder attachment;Coord_src=cM;FlankMarker=BM1237;breed=holstein;VTO_name=udder morphology trait;Map_Type=Linkage;Model=n/a;Significance=Significant;P-value=0.004
Chr.10	Milk_QTL	27479423	98525906	QTL_ID=21541;Name=Milk alpha-casein percentage;Abbrev=MACASP;PUBMED_ID=19397519;trait_ID=1386;trait=Milk alpha-casein percentage;Coord_src=cM;breed=holstein;VTO_name=milk alpha-casein amount;PTO_name=milk alpha-casein content;CMO_name=milk alpha-casein percentage;Map_Type=Linkage;Model=-;Test_Base=Genome-wise;Significance=Suggestive;P-value=0.027;F-Stat=4.41
Chr.10	Milk_QTL	27479423	98525906	QTL_ID=21541;Name=Milk alpha-casein percentage;Abbrev=MACASP;PUBMED_ID=19397519;trait_ID=1386;trait=Milk alpha-casein percentage;Coord_src=cM;breed=holstein;VTO_name=milk alpha-casein amount;PTO_name=milk alpha-casein content;CMO_name=milk alpha-casein percentage;Map_Type=Linkage;Model=-;Test_Base=Genome-wise;Significance=Suggestive;P-value=0.027;F-Stat=4.41
Chr.10	Milk_QTL	27479423	98525906	QTL_ID=21541;Name=Milk alpha-casein percentage;Abbrev=MACASP;PUBMED_ID=19397519;trait_ID=1386;trait=Milk alpha-casein percentage;Coord_src=cM;breed=holstein;VTO_name=milk alpha-casein amount;PTO_name=milk alpha-casein content;CMO_name=milk alpha-casein percentage;Map_Type=Linkage;Model=-;Test_Base=Genome-wise;Significance=Suggestive;P-value=0.027;F-Stat=4.41
Chr.10	Milk_QTL	27479423	98525906	QTL_ID=21541;Name=Milk alpha-casein percentage;Abbrev=MACASP;PUBMED_ID=19397519;trait_ID=1386;trait=Milk alpha-casein percentage;Coord_src=cM;breed=holstein;VTO_name=milk alpha-casein amount;PTO_name=milk alpha-casein content;CMO_name=milk alpha-casein percentage;Map_Type=Linkage;Model=-;Test_Base=Genome-wise;Significance=Suggestive;P-value=0.027;F-Stat=4.41
Chr.10	Milk_QTL	27479423	98525906	QTL_ID=21541;Name=Milk alpha-casein percentage;Abbrev=MACASP;PUBMED_ID=19397519;trait_ID=1386;trait=Milk alpha-casein percentage;Coord_src=cM;breed=holstein;VTO_name=milk alpha-casein amount;PTO_name=milk alpha-casein content;CMO_name=milk alpha-casein percentage;Map_Type=Linkage;Model=-;Test_Base=Genome-wise;Significance=Suggestive;P-value=0.027;F-Stat=4.41
Chr.10	Milk_QTL	27479423	98525906	QTL_ID=21541;Name=Milk alpha-casein percentage;Abbrev=MACASP;PUBMED_ID=19397519;trait_ID=1386;trait=Milk alpha-casein percentage;Coord_src=cM;breed=holstein;VTO_name=milk alpha-casein amount;PTO_name=milk alpha-casein content;CMO_name=milk alpha-casein percentage;Map_Type=Linkage;Model=-;Test_Base=Genome-wise;Significance=Suggestive;P-value=0.027;F-Stat=4.41
Chr.10	Milk_QTL	27479423	98525906	QTL_ID=21541;Name=Milk alpha-casein percentage;Abbrev=MACASP;PUBMED_ID=19397519;trait_ID=1386;trait=Milk alpha-casein percentage;Coord_src=cM;breed=holstein;VTO_name=milk alpha-casein amount;PTO_name=milk alpha-casein content;CMO_name=milk alpha-casein percentage;Map_Type=Linkage;Model=-;Test_Base=Genome-wise;Significance=Suggestive;P-value=0.027;F-Stat=4.41
Chr.10	Milk_QTL	27479423	98525906	QTL_ID=21541;Name=Milk alpha-casein percentage;Abbrev=MACASP;PUBMED_ID=19397519;trait_ID=1386;trait=Milk alpha-casein percentage;Coord_src=cM;breed=holstein;VTO_name=milk alpha-casein amount;PTO_name=milk alpha-casein content;CMO_name=milk alpha-casein percentage;Map_Type=Linkage;Model=-;Test_Base=Genome-wise;Significance=Suggestive;P-value=0.027;F-Stat=4.41
Chr.10	Milk_QTL	27479423	98525906	QTL_ID=21541;Name=Milk alpha-casein percentage;Abbrev=MACASP;PUBMED_ID=19397519;trait_ID=1386;trait=Milk alpha-casein percentage;Coord_src=cM;breed=holstein;VTO_name=milk alpha-casein amount;PTO_name=milk alpha-casein content;CMO_name=milk alpha-casein percentage;Map_Type=Linkage;Model=-;Test_Base=Genome-wise;Significance=Suggestive;P-value=0.027;F-Stat=4.41
Chr.10	Milk_QTL	27479423	98525906	QTL_ID=21541;Name=Milk alpha-casein percentage;Abbrev=MACASP;PUBMED_ID=19397519;trait_ID=1386;trait=Milk alpha-casein percentage;Coord_src=cM;breed=holstein;VTO_name=milk alpha-casein amount;PTO_name=milk alpha-casein content;CMO_name=milk alpha-casein percentage;Map_Type=Linkage;Model=-;Test_Base=Genome-wise;Significance=Suggestive;P-value=0.027;F-Stat=4.41
Chr.10	Milk_QTL	27479423	98525906	QTL_ID=21541;Name=Milk alpha-casein percentage;Abbrev=MACASP;PUBMED_ID=19397519;trait_ID=1386;trait=Milk alpha-casein percentage;Coord_src=cM;breed=holstein;VTO_name=milk alpha-casein amount;PTO_name=milk alpha-casein content;CMO_name=milk alpha-casein percentage;Map_Type=Linkage;Model=-;Test_Base=Genome-wise;Significance=Suggestive;P-value=0.027;F-Stat=4.41
Chr.10	Milk_QTL	27479423	98525906	QTL_ID=21541;Name=Milk alpha-casein percentage;Abbrev=MACASP;PUBMED_ID=19397519;trait_ID=1386;trait=Milk alpha-casein percentage;Coord_src=cM;breed=holstein;VTO_name=milk alpha-casein amount;PTO_name=milk alpha-casein content;CMO_name=milk alpha-casein percentage;Map_Type=Linkage;Model=-;Test_Base=Genome-wise;Significance=Suggestive;P-value=0.027;F-Stat=4.41
Chr.10	Milk_QTL	27479423	98525906	QTL_ID=21541;Name=Milk alpha-casein percentage;Abbrev=MACASP;PUBMED_ID=19397519;trait_ID=1386;trait=Milk alpha-casein percentage;Coord_src=cM;breed=holstein;VTO_name=milk alpha-casein amount;PTO_name=milk alpha-casein content;CMO_name=milk alpha-casein percentage;Map_Type=Linkage;Model=-;Test_Base=Genome-wise;Significance=Suggestive;P-value=0.027;F-Stat=4.41
Chr.10	Milk_QTL	27479423	98525906	QTL_ID=21541;Name=Milk alpha-casein percentage;Abbrev=MACASP;PUBMED_ID=19397519;trait_ID=1386;trait=Milk alpha-casein percentage;Coord_src=cM;breed=holstein;VTO_name=milk alpha-casein amount;PTO_name=milk alpha-casein content;CMO_name=milk alpha-casein percentage;Map_Type=Linkage;Model=-;Test_Base=Genome-wise;Significance=Suggestive;P-value=0.027;F-Stat=4.41
Chr.10	Milk_QTL	27479423	98525906	QTL_ID=21541;Name=Milk alpha-casein percentage;Abbrev=MACASP;PUBMED_ID=19397519;trait_ID=1386;trait=Milk alpha-casein percentage;Coord_src=cM;breed=holstein;VTO_name=milk alpha-casein amount;PTO_name=milk alpha-casein content;CMO_name=milk alpha-casein percentage;Map_Type=Linkage;Model=-;Test_Base=Genome-wise;Significance=Suggestive;P-value=0.027;F-Stat=4.41
Chr.10	Milk_QTL	27479423	98525906	QTL_ID=21541;Name=Milk alpha-casein percentage;Abbrev=MACASP;PUBMED_ID=19397519;trait_ID=1386;trait=Milk alpha-casein percentage;Coord_src=cM;breed=holstein;VTO_name=milk alpha-casein amount;PTO_name=milk alpha-casein content;CMO_name=milk alpha-casein percentage;Map_Type=Linkage;Model=-;Test_Base=Genome-wise;Significance=Suggestive;P-value=0.027;F-Stat=4.41
Chr.10	Exterior_QTL	27488119	46871547	QTL_ID=1580;Name=Strength;Abbrev=STR;PUBMED_ID=16230715;trait_ID=1135;trait=Strength;Coord_src=cM;FlankMarker=BL1035,BM875;VTO_name=chest width;Map_Type=Linkage;Significance=Significant;F-Stat=2.83
Chr.10	Exterior_QTL	27488119	46871547	QTL_ID=1580;Name=Strength;Abbrev=STR;PUBMED_ID=16230715;trait_ID=1135;trait=Strength;Coord_src=cM;FlankMarker=BL1035,BM875;VTO_name=chest width;Map_Type=Linkage;Significance=Significant;F-Stat=2.83
Chr.10	Production_QTL	30496942	51750015	QTL_ID=10873;Name=Body weight (yearling);Abbrev=W365;PUBMED_ID=20477797;trait_ID=1064;trait=Body weight (yearling);Coord_src=cM;FlankMarker=SPS113,BMS2742,BMS419;breed=Angus;VTO_name=body mass;CMO_name=body weight;Map_Type=Linkage;Model=Mendelian;Test_Base=Genome-wise;Significance=Significant;P-value=0.016982436525;Bayes-value=8;Dominance_Effect=0.1355
Chr.10	Production_QTL	30496942	51750015	QTL_ID=10873;Name=Body weight (yearling);Abbrev=W365;PUBMED_ID=20477797;trait_ID=1064;trait=Body weight (yearling);Coord_src=cM;FlankMarker=SPS113,BMS2742,BMS419;breed=Angus;VTO_name=body mass;CMO_name=body weight;Map_Type=Linkage;Model=Mendelian;Test_Base=Genome-wise;Significance=Significant;P-value=0.016982436525;Bayes-value=8;Dominance_Effect=0.1355
Chr.10	Production_QTL	30496942	51750015	QTL_ID=10873;Name=Body weight (yearling);Abbrev=W365;PUBMED_ID=20477797;trait_ID=1064;trait=Body weight (yearling);Coord_src=cM;FlankMarker=SPS113,BMS2742,BMS419;breed=Angus;VTO_name=body mass;CMO_name=body weight;Map_Type=Linkage;Model=Mendelian;Test_Base=Genome-wise;Significance=Significant;P-value=0.016982436525;Bayes-value=8;Dominance_Effect=0.1355
Chr.10	Meat_and_Carcass_QTL	37958127	52158727	QTL_ID=7093;Name=Subcutaneous fat;Abbrev=SUBFAT;PUBMED_ID=18791160;trait_ID=1029;trait=Subcutaneous fat;Coord_src=cM;FlankMarker=TGLA378,BM888;breed=charolais,holstein;VTO_name=subcutaneous adipose amount;Map_Type=Linkage;Model=Mendelian;Test_Base=Chromosome-wise;Significance=Significant;P-value=0.01;F-Stat=7.3;Variance=6.06;Dominance_Effect=-0.83;Additive_Effect=-0.5
Chr.10	Meat_and_Carcass_QTL	37958127	52158727	QTL_ID=7093;Name=Subcutaneous fat;Abbrev=SUBFAT;PUBMED_ID=18791160;trait_ID=1029;trait=Subcutaneous fat;Coord_src=cM;FlankMarker=TGLA378,BM888;breed=charolais,holstein;VTO_name=subcutaneous adipose amount;Map_Type=Linkage;Model=Mendelian;Test_Base=Chromosome-wise;Significance=Significant;P-value=0.01;F-Stat=7.3;Variance=6.06;Dominance_Effect=-0.83;Additive_Effect=-0.5
Chr.10	Meat_and_Carcass_QTL	37958127	52158727	QTL_ID=7093;Name=Subcutaneous fat;Abbrev=SUBFAT;PUBMED_ID=18791160;trait_ID=1029;trait=Subcutaneous fat;Coord_src=cM;FlankMarker=TGLA378,BM888;breed=charolais,holstein;VTO_name=subcutaneous adipose amount;Map_Type=Linkage;Model=Mendelian;Test_Base=Chromosome-wise;Significance=Significant;P-value=0.01;F-Stat=7.3;Variance=6.06;Dominance_Effect=-0.83;Additive_Effect=-0.5
Chr.10	Reproduction_QTL	37963344	53784883	QTL_ID=2704;Name=Non-return rate;Abbrev=NRR;PUBMED_ID=12613879;trait_ID=1148;trait=Non-return rate;Coord_src=cM;FlankMarker=TGLA378,TGLA102;VTO_name=fertility trait;Map_Type=Linkage;Significance=Significant;P-value=0.041
Chr.10	Reproduction_QTL	37963344	53784883	QTL_ID=2704;Name=Non-return rate;Abbrev=NRR;PUBMED_ID=12613879;trait_ID=1148;trait=Non-return rate;Coord_src=cM;FlankMarker=TGLA378,TGLA102;VTO_name=fertility trait;Map_Type=Linkage;Significance=Significant;P-value=0.041
Chr.10	Reproduction_QTL	37963344	53784883	QTL_ID=2704;Name=Non-return rate;Abbrev=NRR;PUBMED_ID=12613879;trait_ID=1148;trait=Non-return rate;Coord_src=cM;FlankMarker=TGLA378,TGLA102;VTO_name=fertility trait;Map_Type=Linkage;Significance=Significant;P-value=0.041
Chr.10	Reproduction_QTL	37963344	53784883	QTL_ID=2704;Name=Non-return rate;Abbrev=NRR;PUBMED_ID=12613879;trait_ID=1148;trait=Non-return rate;Coord_src=cM;FlankMarker=TGLA378,TGLA102;VTO_name=fertility trait;Map_Type=Linkage;Significance=Significant;P-value=0.041
Chr.10	Reproduction_QTL	37963344	53784883	QTL_ID=2704;Name=Non-return rate;Abbrev=NRR;PUBMED_ID=12613879;trait_ID=1148;trait=Non-return rate;Coord_src=cM;FlankMarker=TGLA378,TGLA102;VTO_name=fertility trait;Map_Type=Linkage;Significance=Significant;P-value=0.041
Chr.10	Production_QTL	38479888	51750015	QTL_ID=10872;Name=Body weight (mature);Abbrev=MWT;PUBMED_ID=20477797;trait_ID=1271;trait=Body weight (mature);Coord_src=cM;FlankMarker=BMS2742,BMS2742,BMS419;breed=Angus;VTO_name=body mass;CMO_name=body weight;Map_Type=Linkage;Model=Mendelian;Test_Base=Chromosome-wise;Significance=Significant;P-value=0.000257039578;Dominance_Effect=0.1376
Chr.10	Production_QTL	38479888	51750015	QTL_ID=10872;Name=Body weight (mature);Abbrev=MWT;PUBMED_ID=20477797;trait_ID=1271;trait=Body weight (mature);Coord_src=cM;FlankMarker=BMS2742,BMS2742,BMS419;breed=Angus;VTO_name=body mass;CMO_name=body weight;Map_Type=Linkage;Model=Mendelian;Test_Base=Chromosome-wise;Significance=Significant;P-value=0.000257039578;Dominance_Effect=0.1376
Chr.10	Production_QTL	38479888	51750015	QTL_ID=10872;Name=Body weight (mature);Abbrev=MWT;PUBMED_ID=20477797;trait_ID=1271;trait=Body weight (mature);Coord_src=cM;FlankMarker=BMS2742,BMS2742,BMS419;breed=Angus;VTO_name=body mass;CMO_name=body weight;Map_Type=Linkage;Model=Mendelian;Test_Base=Chromosome-wise;Significance=Significant;P-value=0.000257039578;Dominance_Effect=0.1376
Chr.10	Production_Association	44941031	45114951	QTL_ID=25043;Name=Body length;Abbrev=BL;PUBMED_ID=24462757;trait_ID=1114;trait=Body length;Coord_src=cM;breed=Qinchuan;VTO_name=body length;CMO_name=body length;Map_Type=Linkage;Model=Mendelian;Test_Base=-;Significance=Significant;P-value=<0.001;gene_ID=526104;gene_IDsrc=NCBIgene
Chr.10	Health_QTL	46871547	78698981	QTL_ID=12221;Name=Tick resistance;Abbrev=TICKR;PUBMED_ID=20433753;trait_ID=1238;trait=Tick resistance;Coord_src=cM;breed=gir,holstein;VTO_name=response to parasitic infection trait;Map_Type=Linkage;Model=Mendelian;Test_Base=Chromosome-wise;Significance=Significant;P-value=<0.01;F-Stat=12.2;Variance=4.00;Dominance_Effect=0.18;Additive_Effect=0.37
Chr.10	Health_QTL	46871547	78698981	QTL_ID=12221;Name=Tick resistance;Abbrev=TICKR;PUBMED_ID=20433753;trait_ID=1238;trait=Tick resistance;Coord_src=cM;breed=gir,holstein;VTO_name=response to parasitic infection trait;Map_Type=Linkage;Model=Mendelian;Test_Base=Chromosome-wise;Significance=Significant;P-value=<0.01;F-Stat=12.2;Variance=4.00;Dominance_Effect=0.18;Additive_Effect=0.37
Chr.10	Health_QTL	46871547	78698981	QTL_ID=12221;Name=Tick resistance;Abbrev=TICKR;PUBMED_ID=20433753;trait_ID=1238;trait=Tick resistance;Coord_src=cM;breed=gir,holstein;VTO_name=response to parasitic infection trait;Map_Type=Linkage;Model=Mendelian;Test_Base=Chromosome-wise;Significance=Significant;P-value=<0.01;F-Stat=12.2;Variance=4.00;Dominance_Effect=0.18;Additive_Effect=0.37
Chr.10	Health_QTL	46871547	78698981	QTL_ID=12221;Name=Tick resistance;Abbrev=TICKR;PUBMED_ID=20433753;trait_ID=1238;trait=Tick resistance;Coord_src=cM;breed=gir,holstein;VTO_name=response to parasitic infection trait;Map_Type=Linkage;Model=Mendelian;Test_Base=Chromosome-wise;Significance=Significant;P-value=<0.01;F-Stat=12.2;Variance=4.00;Dominance_Effect=0.18;Additive_Effect=0.37
Chr.10	Health_QTL	46871547	78698981	QTL_ID=12221;Name=Tick resistance;Abbrev=TICKR;PUBMED_ID=20433753;trait_ID=1238;trait=Tick resistance;Coord_src=cM;breed=gir,holstein;VTO_name=response to parasitic infection trait;Map_Type=Linkage;Model=Mendelian;Test_Base=Chromosome-wise;Significance=Significant;P-value=<0.01;F-Stat=12.2;Variance=4.00;Dominance_Effect=0.18;Additive_Effect=0.37
Chr.10	Health_QTL	46871547	78698981	QTL_ID=12221;Name=Tick resistance;Abbrev=TICKR;PUBMED_ID=20433753;trait_ID=1238;trait=Tick resistance;Coord_src=cM;breed=gir,holstein;VTO_name=response to parasitic infection trait;Map_Type=Linkage;Model=Mendelian;Test_Base=Chromosome-wise;Significance=Significant;P-value=<0.01;F-Stat=12.2;Variance=4.00;Dominance_Effect=0.18;Additive_Effect=0.37
Chr.10	Health_QTL	46871547	78698981	QTL_ID=12221;Name=Tick resistance;Abbrev=TICKR;PUBMED_ID=20433753;trait_ID=1238;trait=Tick resistance;Coord_src=cM;breed=gir,holstein;VTO_name=response to parasitic infection trait;Map_Type=Linkage;Model=Mendelian;Test_Base=Chromosome-wise;Significance=Significant;P-value=<0.01;F-Stat=12.2;Variance=4.00;Dominance_Effect=0.18;Additive_Effect=0.37
Chr.10	Health_QTL	46871547	78698981	QTL_ID=12221;Name=Tick resistance;Abbrev=TICKR;PUBMED_ID=20433753;trait_ID=1238;trait=Tick resistance;Coord_src=cM;breed=gir,holstein;VTO_name=response to parasitic infection trait;Map_Type=Linkage;Model=Mendelian;Test_Base=Chromosome-wise;Significance=Significant;P-value=<0.01;F-Stat=12.2;Variance=4.00;Dominance_Effect=0.18;Additive_Effect=0.37
Chr.10	Health_QTL	46871547	78698981	QTL_ID=12221;Name=Tick resistance;Abbrev=TICKR;PUBMED_ID=20433753;trait_ID=1238;trait=Tick resistance;Coord_src=cM;breed=gir,holstein;VTO_name=response to parasitic infection trait;Map_Type=Linkage;Model=Mendelian;Test_Base=Chromosome-wise;Significance=Significant;P-value=<0.01;F-Stat=12.2;Variance=4.00;Dominance_Effect=0.18;Additive_Effect=0.37
Chr.10	Health_QTL	46871547	78698981	QTL_ID=12221;Name=Tick resistance;Abbrev=TICKR;PUBMED_ID=20433753;trait_ID=1238;trait=Tick resistance;Coord_src=cM;breed=gir,holstein;VTO_name=response to parasitic infection trait;Map_Type=Linkage;Model=Mendelian;Test_Base=Chromosome-wise;Significance=Significant;P-value=<0.01;F-Stat=12.2;Variance=4.00;Dominance_Effect=0.18;Additive_Effect=0.37
Chr.10	Health_QTL	46871547	78698981	QTL_ID=12221;Name=Tick resistance;Abbrev=TICKR;PUBMED_ID=20433753;trait_ID=1238;trait=Tick resistance;Coord_src=cM;breed=gir,holstein;VTO_name=response to parasitic infection trait;Map_Type=Linkage;Model=Mendelian;Test_Base=Chromosome-wise;Significance=Significant;P-value=<0.01;F-Stat=12.2;Variance=4.00;Dominance_Effect=0.18;Additive_Effect=0.37
Chr.10	Production_QTL	51750015	68698558	QTL_ID=10875;Name=Height (yearling);Abbrev=YRLHT;PUBMED_ID=20477797;trait_ID=1269;trait=Height (yearling);Coord_src=cM;FlankMarker=BMS419,INRA037,INRA037;breed=Angus;VTO_name=body height;CMO_name=body height;Map_Type=Linkage;Model=Mendelian;Test_Base=Chromosome-wise;Significance=Significant;P-value=0.006456542290;Dominance_Effect=0.0125
Chr.10	Production_QTL	51750015	68698558	QTL_ID=10875;Name=Height (yearling);Abbrev=YRLHT;PUBMED_ID=20477797;trait_ID=1269;trait=Height (yearling);Coord_src=cM;FlankMarker=BMS419,INRA037,INRA037;breed=Angus;VTO_name=body height;CMO_name=body height;Map_Type=Linkage;Model=Mendelian;Test_Base=Chromosome-wise;Significance=Significant;P-value=0.006456542290;Dominance_Effect=0.0125
Chr.10	Production_QTL	51750015	68698558	QTL_ID=10875;Name=Height (yearling);Abbrev=YRLHT;PUBMED_ID=20477797;trait_ID=1269;trait=Height (yearling);Coord_src=cM;FlankMarker=BMS419,INRA037,INRA037;breed=Angus;VTO_name=body height;CMO_name=body height;Map_Type=Linkage;Model=Mendelian;Test_Base=Chromosome-wise;Significance=Significant;P-value=0.006456542290;Dominance_Effect=0.0125
Chr.10	Production_QTL	51750015	68698558	QTL_ID=10875;Name=Height (yearling);Abbrev=YRLHT;PUBMED_ID=20477797;trait_ID=1269;trait=Height (yearling);Coord_src=cM;FlankMarker=BMS419,INRA037,INRA037;breed=Angus;VTO_name=body height;CMO_name=body height;Map_Type=Linkage;Model=Mendelian;Test_Base=Chromosome-wise;Significance=Significant;P-value=0.006456542290;Dominance_Effect=0.0125
Chr.10	Production_QTL	51750015	68698558	QTL_ID=10875;Name=Height (yearling);Abbrev=YRLHT;PUBMED_ID=20477797;trait_ID=1269;trait=Height (yearling);Coord_src=cM;FlankMarker=BMS419,INRA037,INRA037;breed=Angus;VTO_name=body height;CMO_name=body height;Map_Type=Linkage;Model=Mendelian;Test_Base=Chromosome-wise;Significance=Significant;P-value=0.006456542290;Dominance_Effect=0.0125
Chr.10	Production_QTL	51750015	68698558	QTL_ID=10875;Name=Height (yearling);Abbrev=YRLHT;PUBMED_ID=20477797;trait_ID=1269;trait=Height (yearling);Coord_src=cM;FlankMarker=BMS419,INRA037,INRA037;breed=Angus;VTO_name=body height;CMO_name=body height;Map_Type=Linkage;Model=Mendelian;Test_Base=Chromosome-wise;Significance=Significant;P-value=0.006456542290;Dominance_Effect=0.0125
Chr.10	Exterior_QTL	52158727	67663731	QTL_ID=7136;Name=Social separation--Walking/running;Abbrev=SSWR;PUBMED_ID=18784067;trait_ID=1234;trait=Social separation--Walking/running;Coord_src=cM;FlankMarker=BM888,CSRM60;breed=charolais,holstein;VTO_name=conspecific interaction trait;Map_Type=Linkage;Model=Mendelian;Test_Base=Chromosome-wise;Significance=Significant;P-value=0.0379;F-Stat=4.81;Variance=4.18;Dominance_Effect=30.16;Additive_Ef…
Chr.10	Exterior_QTL	52158727	67663731	QTL_ID=7136;Name=Social separation--Walking/running;Abbrev=SSWR;PUBMED_ID=18784067;trait_ID=1234;trait=Social separation--Walking/running;Coord_src=cM;FlankMarker=BM888,CSRM60;breed=charolais,holstein;VTO_name=conspecific interaction trait;Map_Type=Linkage;Model=Mendelian;Test_Base=Chromosome-wise;Significance=Significant;P-value=0.0379;F-Stat=4.81;Variance=4.18;Dominance_Effect=30.16;Additive_Ef…
Chr.10	Exterior_QTL	52158727	67663731	QTL_ID=7136;Name=Social separation--Walking/running;Abbrev=SSWR;PUBMED_ID=18784067;trait_ID=1234;trait=Social separation--Walking/running;Coord_src=cM;FlankMarker=BM888,CSRM60;breed=charolais,holstein;VTO_name=conspecific interaction trait;Map_Type=Linkage;Model=Mendelian;Test_Base=Chromosome-wise;Significance=Significant;P-value=0.0379;F-Stat=4.81;Variance=4.18;Dominance_Effect=30.16;Additive_Ef…
Chr.10	Exterior_QTL	52158727	67663731	QTL_ID=7136;Name=Social separation--Walking/running;Abbrev=SSWR;PUBMED_ID=18784067;trait_ID=1234;trait=Social separation--Walking/running;Coord_src=cM;FlankMarker=BM888,CSRM60;breed=charolais,holstein;VTO_name=conspecific interaction trait;Map_Type=Linkage;Model=Mendelian;Test_Base=Chromosome-wise;Significance=Significant;P-value=0.0379;F-Stat=4.81;Variance=4.18;Dominance_Effect=30.16;Additive_Ef…
Chr.10	Exterior_QTL	52158727	67663731	QTL_ID=7136;Name=Social separation--Walking/running;Abbrev=SSWR;PUBMED_ID=18784067;trait_ID=1234;trait=Social separation--Walking/running;Coord_src=cM;FlankMarker=BM888,CSRM60;breed=charolais,holstein;VTO_name=conspecific interaction trait;Map_Type=Linkage;Model=Mendelian;Test_Base=Chromosome-wise;Significance=Significant;P-value=0.0379;F-Stat=4.81;Variance=4.18;Dominance_Effect=30.16;Additive_Ef…
Chr.10	Exterior_QTL	52158727	67663731	QTL_ID=7136;Name=Social separation--Walking/running;Abbrev=SSWR;PUBMED_ID=18784067;trait_ID=1234;trait=Social separation--Walking/running;Coord_src=cM;FlankMarker=BM888,CSRM60;breed=charolais,holstein;VTO_name=conspecific interaction trait;Map_Type=Linkage;Model=Mendelian;Test_Base=Chromosome-wise;Significance=Significant;P-value=0.0379;F-Stat=4.81;Variance=4.18;Dominance_Effect=30.16;Additive_Ef…
Chr.10	Milk_QTL	53791840	67663731	QTL_ID=2554;Name=Milk yield;Abbrev=MY;PUBMED_ID=11417712;trait_ID=1044;trait=Milk yield;Coord_src=cM;FlankMarker=TGLA102,CSRM60;VTO_name=milk amount;CMO_name=milk yield;Map_Type=Linkage;Significance=Significant;P-value=0.050
Chr.10	Milk_QTL	53791840	67663731	QTL_ID=2554;Name=Milk yield;Abbrev=MY;PUBMED_ID=11417712;trait_ID=1044;trait=Milk yield;Coord_src=cM;FlankMarker=TGLA102,CSRM60;VTO_name=milk amount;CMO_name=milk yield;Map_Type=Linkage;Significance=Significant;P-value=0.050
Chr.10	Milk_QTL	53791840	67663731	QTL_ID=2554;Name=Milk yield;Abbrev=MY;PUBMED_ID=11417712;trait_ID=1044;trait=Milk yield;Coord_src=cM;FlankMarker=TGLA102,CSRM60;VTO_name=milk amount;CMO_name=milk yield;Map_Type=Linkage;Significance=Significant;P-value=0.050
Chr.10	Milk_QTL	53791840	67663731	QTL_ID=2554;Name=Milk yield;Abbrev=MY;PUBMED_ID=11417712;trait_ID=1044;trait=Milk yield;Coord_src=cM;FlankMarker=TGLA102,CSRM60;VTO_name=milk amount;CMO_name=milk yield;Map_Type=Linkage;Significance=Significant;P-value=0.050
Chr.10	Health_QTL	57393732	78368532	QTL_ID=3436;Name=Somatic cell score;Abbrev=SCS;PUBMED_ID=12605852;trait_ID=1005;trait=Somatic cell score;Coord_src=cM;FlankMarker=DIK020;VTO_name=milk somatic cell quantity;PTO_name=milk somatic cell count;CMO_name=milk somatic cell score;Map_Type=Linkage;P-value=0.009
Chr.10	Health_QTL	57393732	78368532	QTL_ID=3436;Name=Somatic cell score;Abbrev=SCS;PUBMED_ID=12605852;trait_ID=1005;trait=Somatic cell score;Coord_src=cM;FlankMarker=DIK020;VTO_name=milk somatic cell quantity;PTO_name=milk somatic cell count;CMO_name=milk somatic cell score;Map_Type=Linkage;P-value=0.009
Chr.10	Health_QTL	57393732	78368532	QTL_ID=3436;Name=Somatic cell score;Abbrev=SCS;PUBMED_ID=12605852;trait_ID=1005;trait=Somatic cell score;Coord_src=cM;FlankMarker=DIK020;VTO_name=milk somatic cell quantity;PTO_name=milk somatic cell count;CMO_name=milk somatic cell score;Map_Type=Linkage;P-value=0.009
Chr.10	Health_QTL	57393732	78368532	QTL_ID=3436;Name=Somatic cell score;Abbrev=SCS;PUBMED_ID=12605852;trait_ID=1005;trait=Somatic cell score;Coord_src=cM;FlankMarker=DIK020;VTO_name=milk somatic cell quantity;PTO_name=milk somatic cell count;CMO_name=milk somatic cell score;Map_Type=Linkage;P-value=0.009
Chr.10	Exterior_QTL	67663731	95047498	QTL_ID=1579;Name=Udder attachment;Abbrev=UA;PUBMED_ID=16230715;trait_ID=1133;trait=Udder attachment;Coord_src=cM;FlankMarker=CSRM60,BMS2614;VTO_name=udder morphology trait;Map_Type=Linkage;Significance=Significant;F-Stat=2.71
Chr.10	Exterior_QTL	67663731	95047498	QTL_ID=1579;Name=Udder attachment;Abbrev=UA;PUBMED_ID=16230715;trait_ID=1133;trait=Udder attachment;Coord_src=cM;FlankMarker=CSRM60,BMS2614;VTO_name=udder morphology trait;Map_Type=Linkage;Significance=Significant;F-Stat=2.71
Chr.10	Exterior_QTL	67663731	95047498	QTL_ID=1579;Name=Udder attachment;Abbrev=UA;PUBMED_ID=16230715;trait_ID=1133;trait=Udder attachment;Coord_src=cM;FlankMarker=CSRM60,BMS2614;VTO_name=udder morphology trait;Map_Type=Linkage;Significance=Significant;F-Stat=2.71
Chr.10	Exterior_QTL	67663731	95047498	QTL_ID=1579;Name=Udder attachment;Abbrev=UA;PUBMED_ID=16230715;trait_ID=1133;trait=Udder attachment;Coord_src=cM;FlankMarker=CSRM60,BMS2614;VTO_name=udder morphology trait;Map_Type=Linkage;Significance=Significant;F-Stat=2.71
Chr.10	Exterior_QTL	67663731	95047498	QTL_ID=1579;Name=Udder attachment;Abbrev=UA;PUBMED_ID=16230715;trait_ID=1133;trait=Udder attachment;Coord_src=cM;FlankMarker=CSRM60,BMS2614;VTO_name=udder morphology trait;Map_Type=Linkage;Significance=Significant;F-Stat=2.71
Chr.10	Exterior_QTL	67663731	95047498	QTL_ID=1579;Name=Udder attachment;Abbrev=UA;PUBMED_ID=16230715;trait_ID=1133;trait=Udder attachment;Coord_src=cM;FlankMarker=CSRM60,BMS2614;VTO_name=udder morphology trait;Map_Type=Linkage;Significance=Significant;F-Stat=2.71
Chr.10	Exterior_QTL	67663731	95047498	QTL_ID=1579;Name=Udder attachment;Abbrev=UA;PUBMED_ID=16230715;trait_ID=1133;trait=Udder attachment;Coord_src=cM;FlankMarker=CSRM60,BMS2614;VTO_name=udder morphology trait;Map_Type=Linkage;Significance=Significant;F-Stat=2.71
Chr.10	Meat_and_Carcass_QTL	67663731	73211792	QTL_ID=12245;Name=Docosahexaenoic acid content;Abbrev=FA-C22:6;PUBMED_ID=20416790;trait_ID=1364;trait=Docosahexaenoic acid content;Coord_src=cM;FlankMarker=CSRM60,MNB-78;breed=charolais,holstein;PTO_name=meat fatty acid C22:6 content;Map_Type=Linkage;Model=Mendelian;Test_Base=Chromosome-wise;Significance=Significant;P-value=0.0157;F-Stat=6.58;Variance=5.82
Chr.10	Meat_and_Carcass_QTL	67663731	73211792	QTL_ID=12245;Name=Docosahexaenoic acid content;Abbrev=FA-C22:6;PUBMED_ID=20416790;trait_ID=1364;trait=Docosahexaenoic acid content;Coord_src=cM;FlankMarker=CSRM60,MNB-78;breed=charolais,holstein;PTO_name=meat fatty acid C22:6 content;Map_Type=Linkage;Model=Mendelian;Test_Base=Chromosome-wise;Significance=Significant;P-value=0.0157;F-Stat=6.58;Variance=5.82
Chr.10	Meat_and_Carcass_QTL	67663731	73211792	QTL_ID=12245;Name=Docosahexaenoic acid content;Abbrev=FA-C22:6;PUBMED_ID=20416790;trait_ID=1364;trait=Docosahexaenoic acid content;Coord_src=cM;FlankMarker=CSRM60,MNB-78;breed=charolais,holstein;PTO_name=meat fatty acid C22:6 content;Map_Type=Linkage;Model=Mendelian;Test_Base=Chromosome-wise;Significance=Significant;P-value=0.0157;F-Stat=6.58;Variance=5.82
Chr.10	Meat_and_Carcass_QTL	67663731	73211792	QTL_ID=12245;Name=Docosahexaenoic acid content;Abbrev=FA-C22:6;PUBMED_ID=20416790;trait_ID=1364;trait=Docosahexaenoic acid content;Coord_src=cM;FlankMarker=CSRM60,MNB-78;breed=charolais,holstein;PTO_name=meat fatty acid C22:6 content;Map_Type=Linkage;Model=Mendelian;Test_Base=Chromosome-wise;Significance=Significant;P-value=0.0157;F-Stat=6.58;Variance=5.82
Chr.10	Reproduction_QTL	67663731	87655881	QTL_ID=11444;Name=Dystocia;Abbrev=DYST;PUBMED_ID=12613879;trait_ID=1279;trait=Dystocia;Coord_src=cM;FlankMarker=CSRM60,BP31;breed=holstein;VTO_name=parturition trait;Map_Type=Linkage;Model=Mendelian;Test_Base=Chromosome-wise;Significance=Significant;P-value=0.014
Chr.10	Reproduction_QTL	67663731	89916846	QTL_ID=11353;Name=Dystocia;Abbrev=DYST;PUBMED_ID=19912419;trait_ID=1279;trait=Dystocia;Coord_src=cM;FlankMarker=CSRM60,CSSM046;breed=holstein;VTO_name=parturition trait;Map_Type=Linkage;Model=Mendelian;Test_Base=Chromosome-wise;Significance=Significant;P-value=0.023
Chr.10	Reproduction_QTL	67663731	87655881	QTL_ID=11444;Name=Dystocia;Abbrev=DYST;PUBMED_ID=12613879;trait_ID=1279;trait=Dystocia;Coord_src=cM;FlankMarker=CSRM60,BP31;breed=holstein;VTO_name=parturition trait;Map_Type=Linkage;Model=Mendelian;Test_Base=Chromosome-wise;Significance=Significant;P-value=0.014
Chr.10	Reproduction_QTL	67663731	89916846	QTL_ID=11353;Name=Dystocia;Abbrev=DYST;PUBMED_ID=19912419;trait_ID=1279;trait=Dystocia;Coord_src=cM;FlankMarker=CSRM60,CSSM046;breed=holstein;VTO_name=parturition trait;Map_Type=Linkage;Model=Mendelian;Test_Base=Chromosome-wise;Significance=Significant;P-value=0.023
Chr.10	Reproduction_QTL	67663731	87655881	QTL_ID=11444;Name=Dystocia;Abbrev=DYST;PUBMED_ID=12613879;trait_ID=1279;trait=Dystocia;Coord_src=cM;FlankMarker=CSRM60,BP31;breed=holstein;VTO_name=parturition trait;Map_Type=Linkage;Model=Mendelian;Test_Base=Chromosome-wise;Significance=Significant;P-value=0.014
Chr.10	Reproduction_QTL	67663731	89916846	QTL_ID=11353;Name=Dystocia;Abbrev=DYST;PUBMED_ID=19912419;trait_ID=1279;trait=Dystocia;Coord_src=cM;FlankMarker=CSRM60,CSSM046;breed=holstein;VTO_name=parturition trait;Map_Type=Linkage;Model=Mendelian;Test_Base=Chromosome-wise;Significance=Significant;P-value=0.023
Chr.10	Reproduction_QTL	67663731	87655881	QTL_ID=11444;Name=Dystocia;Abbrev=DYST;PUBMED_ID=12613879;trait_ID=1279;trait=Dystocia;Coord_src=cM;FlankMarker=CSRM60,BP31;breed=holstein;VTO_name=parturition trait;Map_Type=Linkage;Model=Mendelian;Test_Base=Chromosome-wise;Significance=Significant;P-value=0.014
[truncated: 680 more rows]
