# Supplementary figures and images for: Assessing Genomic Diversity and Signatures of Selection in Chinese Red Steppe Cattle Using High-Density SNP Array
Source: MDPI journal article supplement (doi:10.3390/ani13101717), 2023-05-22

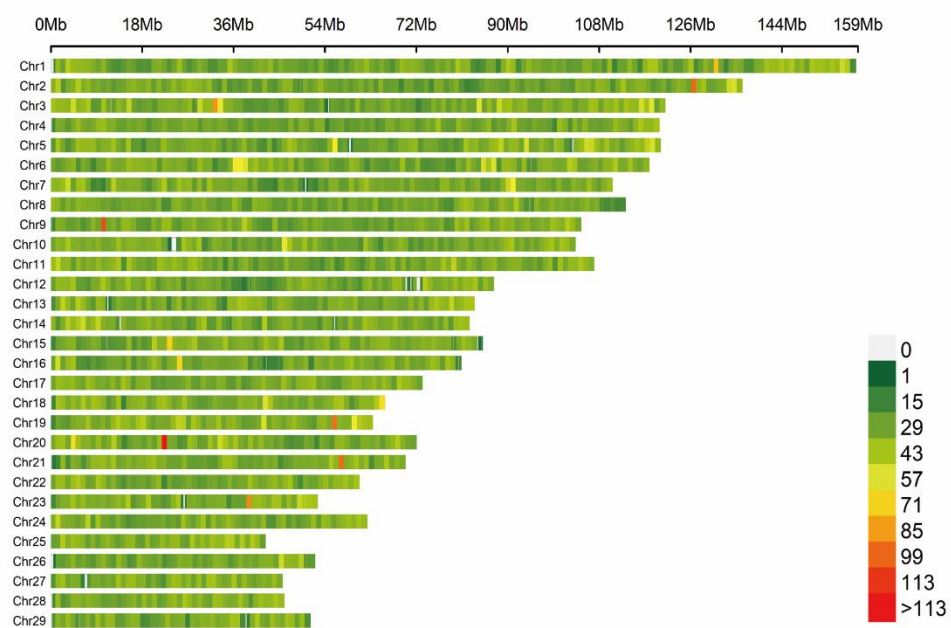

Fig.S1 Density distribution map of SNPs on chromosome within 1 Mb window size

Supplement: s1 [file s1]
